# Supplementary material for: Unsupervised AI reveals insect species-specific genome signatures
Source: PeerJ journal article supplement (doi:10.7717/peerj.17025), 2024-03-06
Supplement: Data_S1.pdf [file Data_S1.pdf]

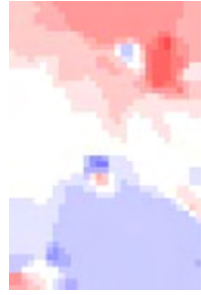

AAAAC+GTTT

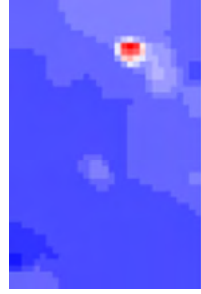

AAAAG+CTTT

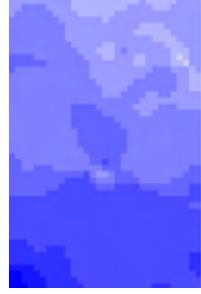

AAAAT+ATTT

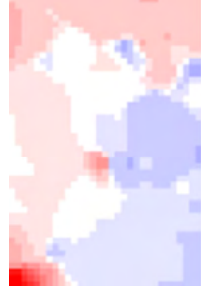

AAACA+TGTT

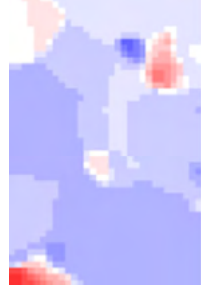

AAACC+GGTT

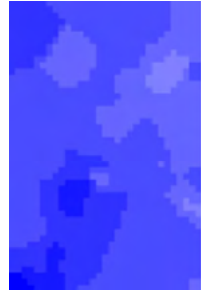

AAACG+CGTT

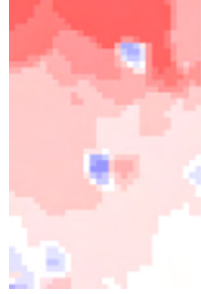

AAACT+AGTT

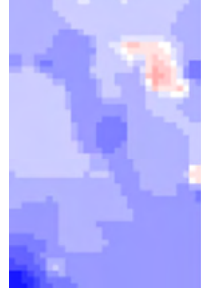

AAAGA+TC TT

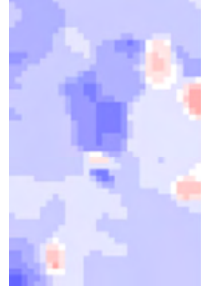

AAAGC+GCTT

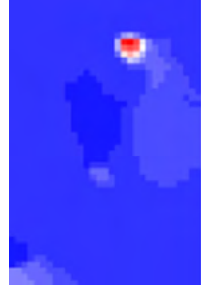

AAAGG+CCTT

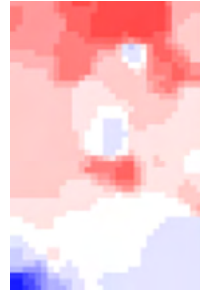

AAAGT+ACTT

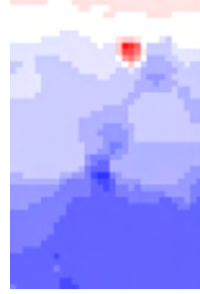

AAATA+TATT

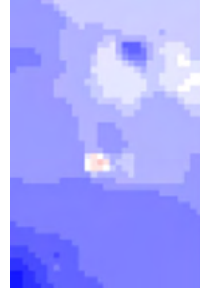

AAATC+GATT

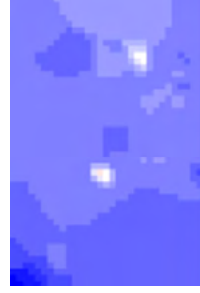

AAATG+CATT

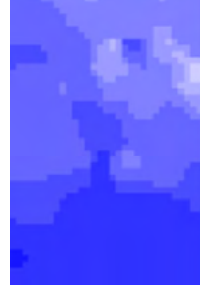

AAATT+AATT

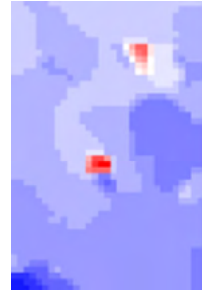

AACAA+TTGTT

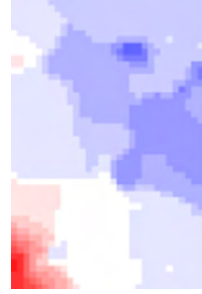

AACAC+GTGTT

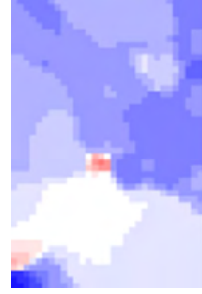

AACAG+CTGTT

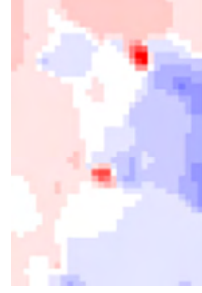

AACAT+ATGTT

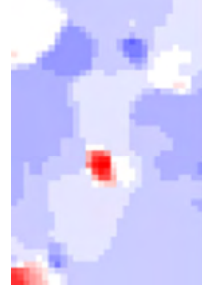

AACCA+TGGTT

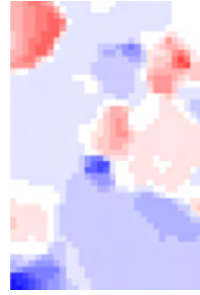

AACCC+GGTT

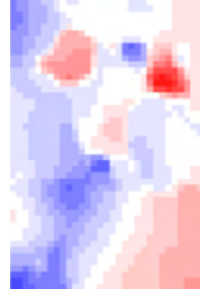

AACCG+CGTT

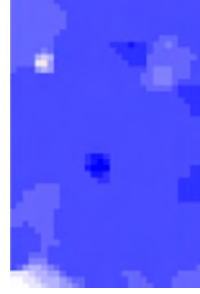

AACCT+AGGTT

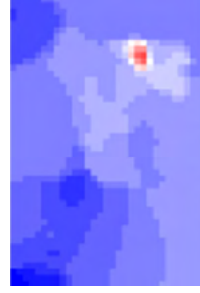

AACGA+TCGTT

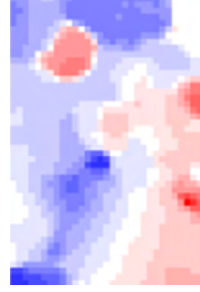

AACGC+GCGTT

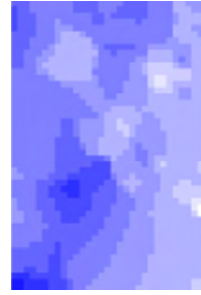

AACGG+CCGTT

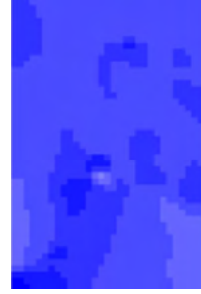

AACGT+ACGTT

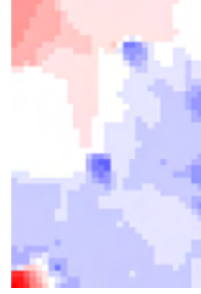

AACTA+TAGTT

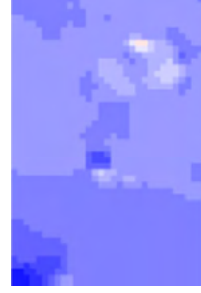

AACTC+GAGTT

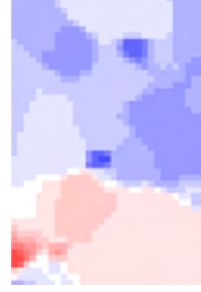

AACAG+CTCCT

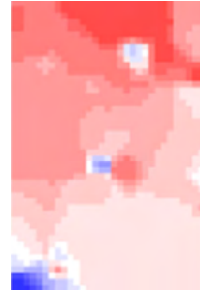

AACTT+AAGTT

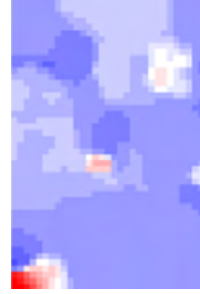

AAGAA+TTCTT

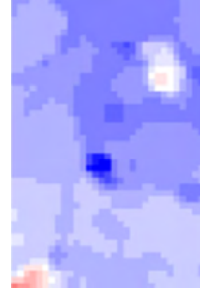

AAGAC+GTCCT

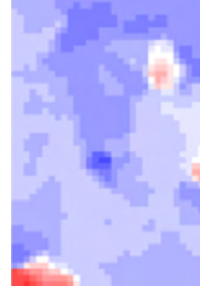

AAGAG+CTCCT

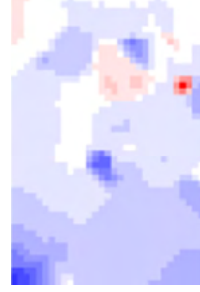

AAGAT+ATCCT





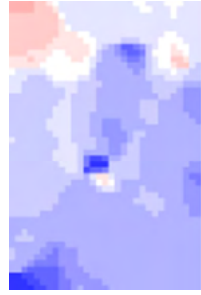

ACTAA+TTAGT

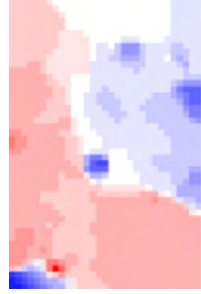

ACTAC+GTAGT

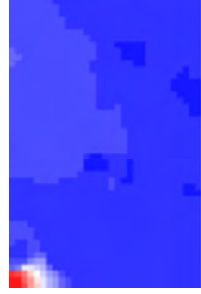

ACTAG+CTAGT

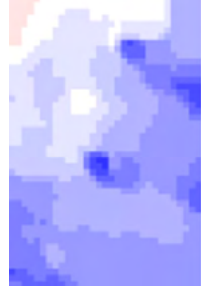

ACTAT+ATAGT

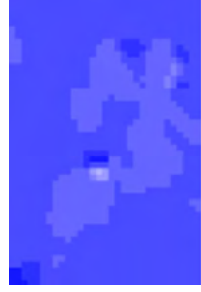

ACTCA+TGAGT

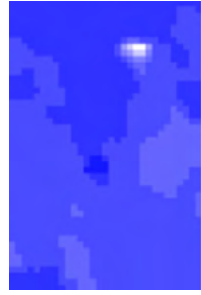

ACTCC+GGAGT

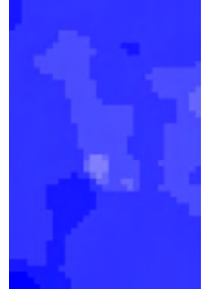

ACTCG+CGAGT

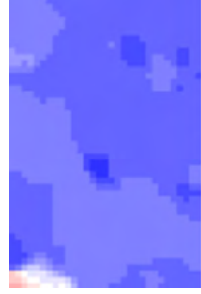

ACTCT+AGAGT

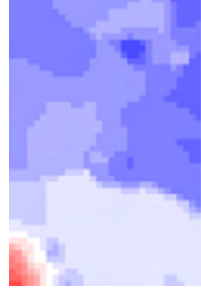

ACTGA+TCAGT

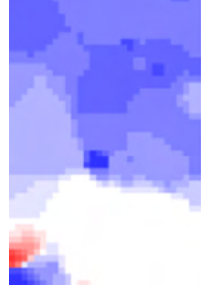

ACTGC+GCAGT

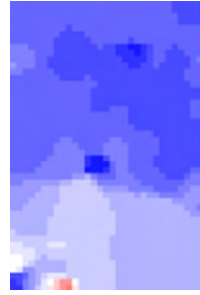

ACTGG+CCAGT

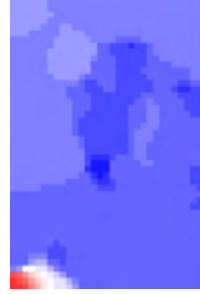

ACTTA+TAAGT

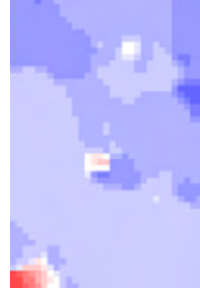

ACTTC+GAAGT

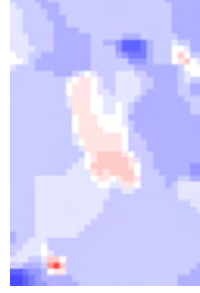

ACTTG+CAAGT

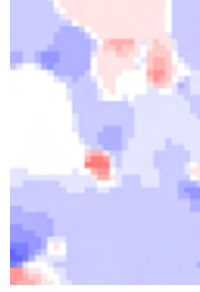

AGAAA+TTTCT

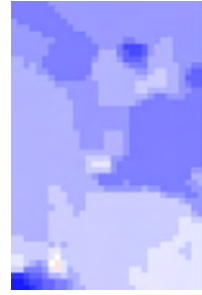

AGAAC+GTTCT

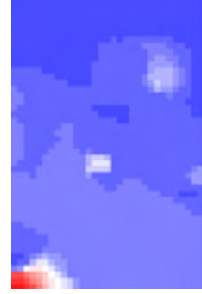

AGAAG+CTTCT

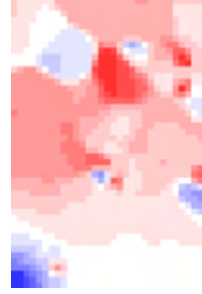

AGAAT+ATTCT

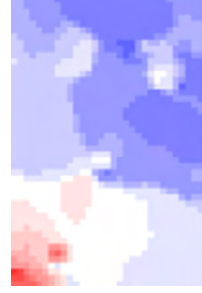

AGACA+TGCTCT

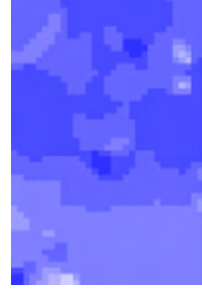

AGACC+GGTCT

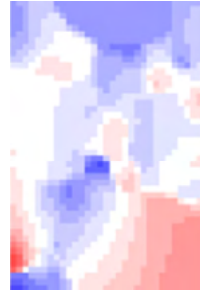

AGACG+CGTCT

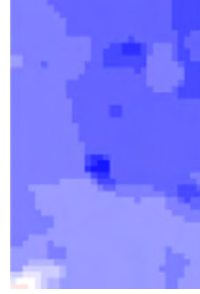

AGACT+AGTCT

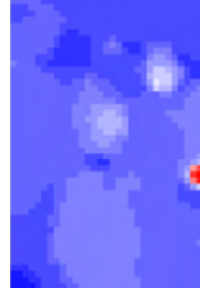

AGAGA+TCTCT

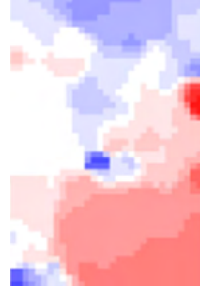

AGAGC+GCTCT

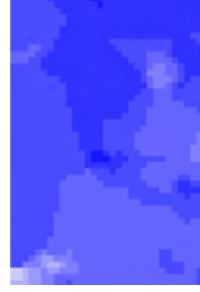

AGAGG+CCTCT

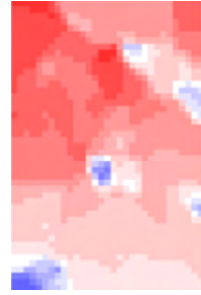

AGATA+TATCT

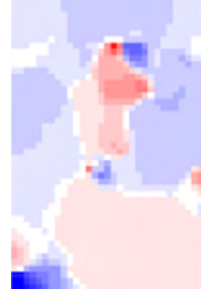

AGATC+GATCT

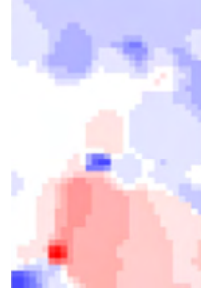

AGATG+CATCT

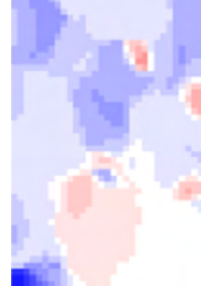

AGCAA+TTGCT

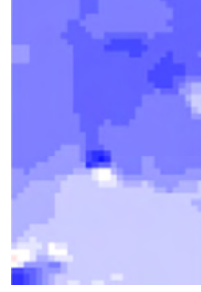

AGCAC+GTGCT

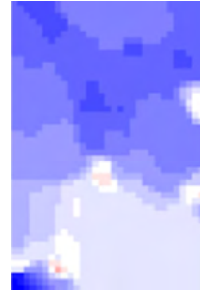

AGCAG+CTGCT

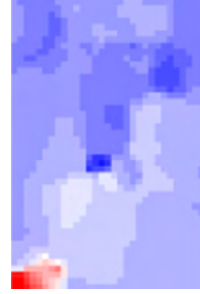

AGCAT+ATGCT

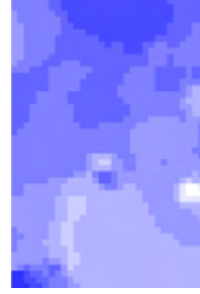

AGCCA+TGGCT

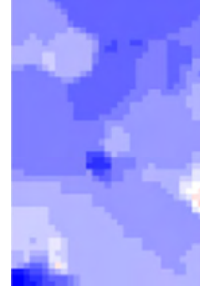

AGCCC+GGGCT

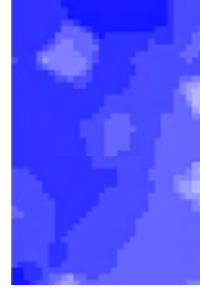

AGCCG+CGGCT

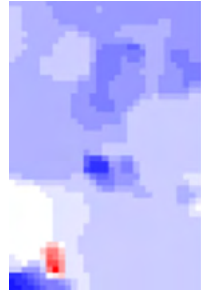

AGCCT+AGGCT

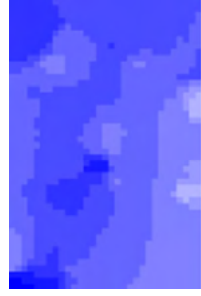

AGCGA+TCGCT

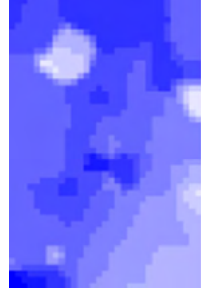

AGCGC+CCGCT

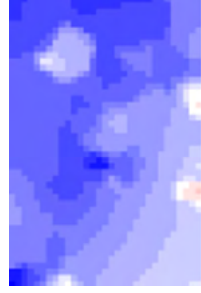

AGCGG+CCGCT

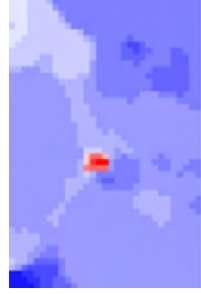

AGCTA+TAGCT

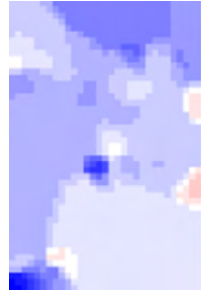

AGCTC+GAGCT

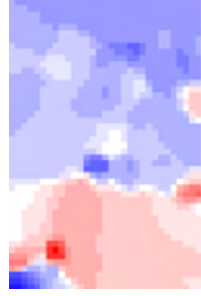

AGCTG+CAGCT

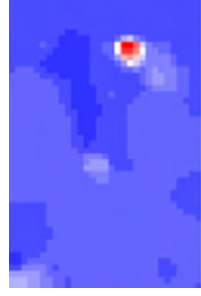

AGGAA+TTCCT

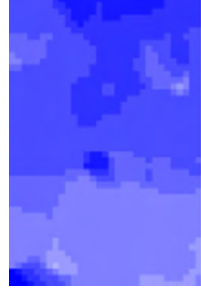

AGGAC+GTCCT

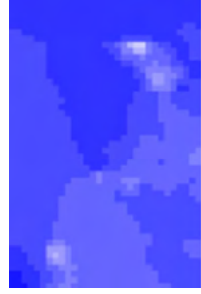

AGGAG+CTCCT

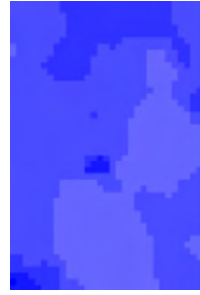

AGGAT+ATCCT

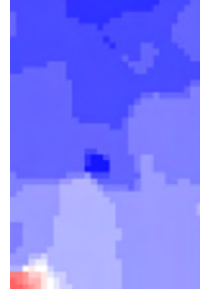

AGGCA+TGCCT

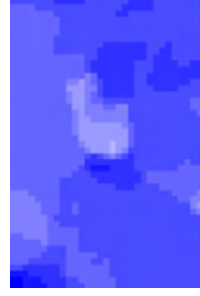

AGGCC+GGCCT

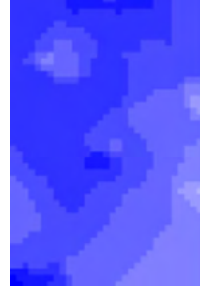

AGGCG+CGCCT

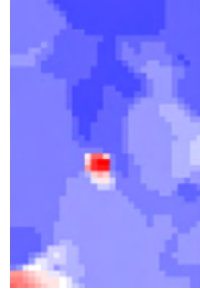

AGGGA+TCCCT

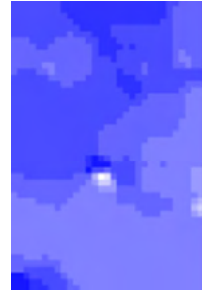

AGGGC+GCCCT

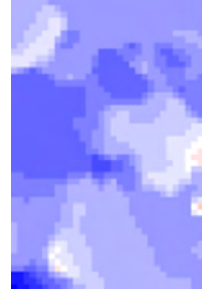

AGGGG+CCCCT

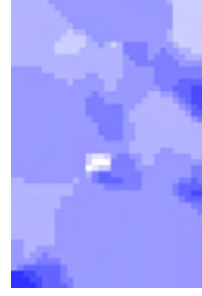

AGGTA+TACCT

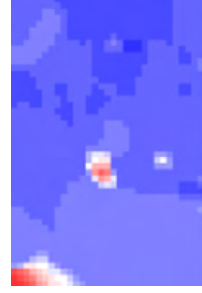

AGGTC+GACCT

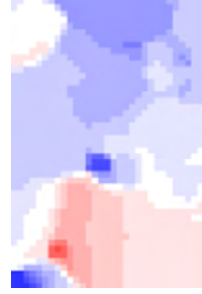

AGGTG+CACCT

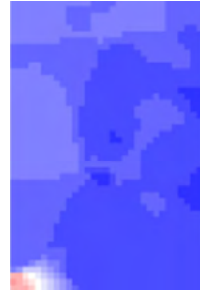

AGTAA+TTACT

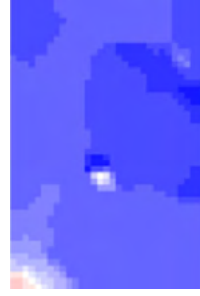

AGTAC+GTACT

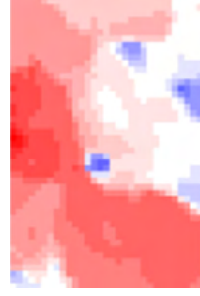

AGTAG+CTACT

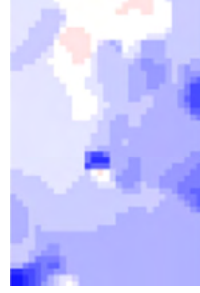

AGTAT+ATACT

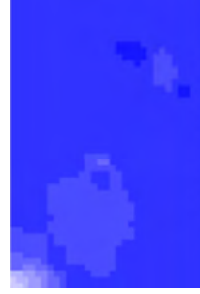

AGTCA+TGACT

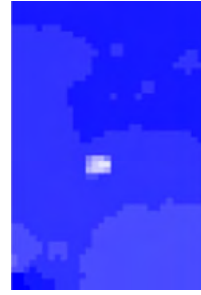

AGTCC+GGACT

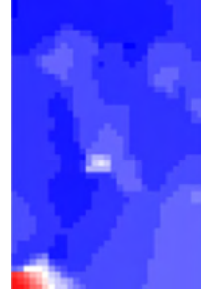

AGTCG+CGACT

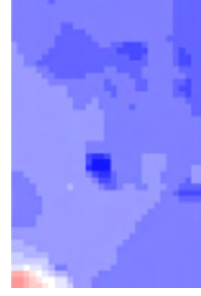

AGTGA+TCACT

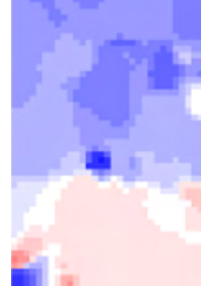

AGTGC+GCACT

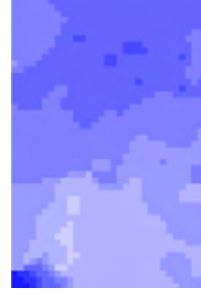

AGTGG+CCACT

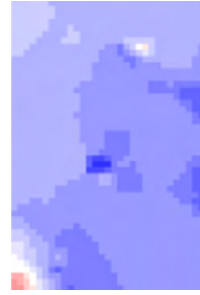

AGTTA+TAACT

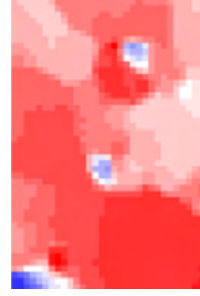

AGTTC+GAACT

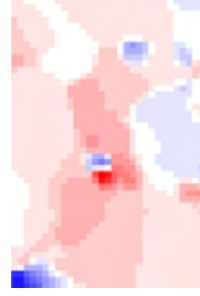

AGTTG+CAACT

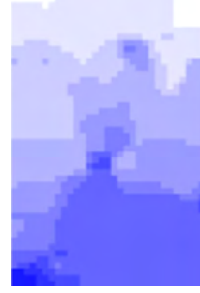

ATAAA+TTTAT

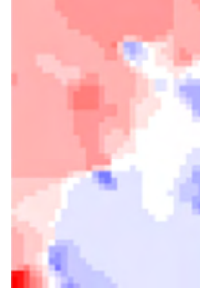

ATAAC+GTTAT



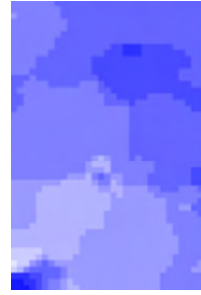

ATGTG+CACAT

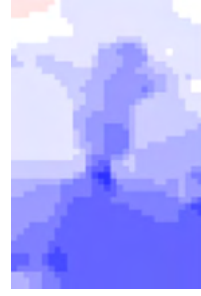

ATTAA+TTAAT

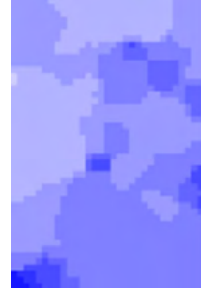

ATTAC+GTAAT

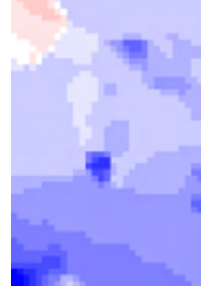

ATTAG+CTAAT

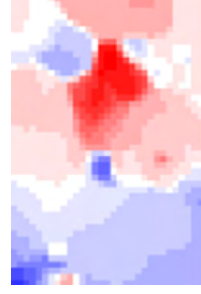

ATTCA+TGAAT

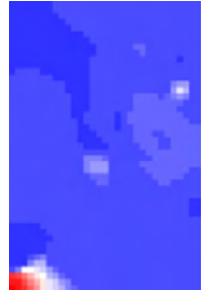

ATTCC+GGAAT

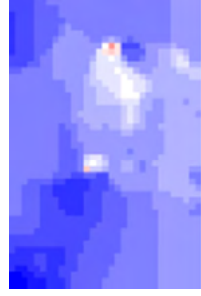

ATTCG+CGAAT

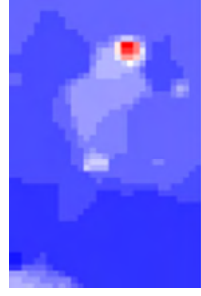

ATTGA+TCAAT

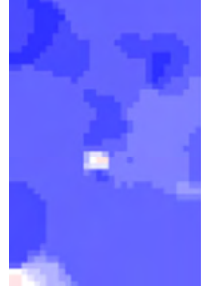

ATTGC+GCAAT

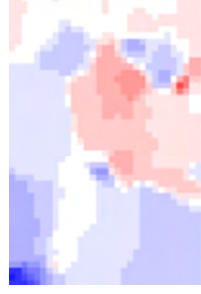

ATTGG+CCAAT

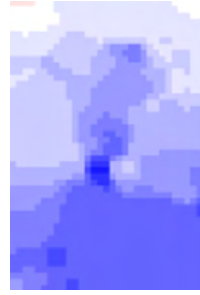

ATTTA+TAAAT

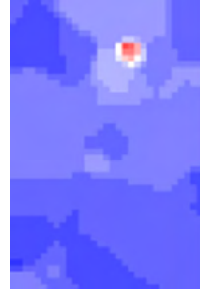

ATTTC+GAAAT

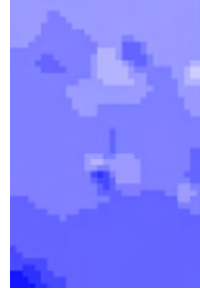

ATTTG+CAAAT

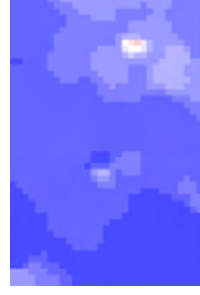

CAAAA+TTTTG

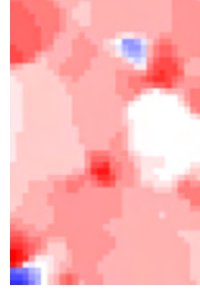

CAAAC+GTTTG

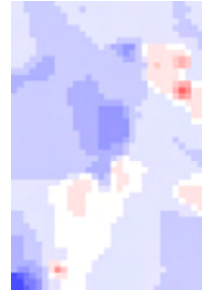

CAAAG+CTTTG

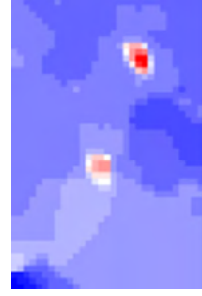

CAACA+TGTTG

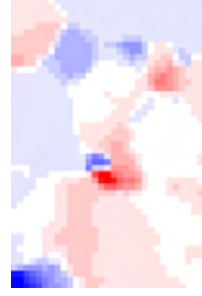

CAACC+GGTTG

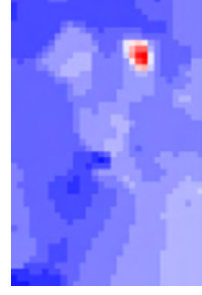

CAACG+CGTTG

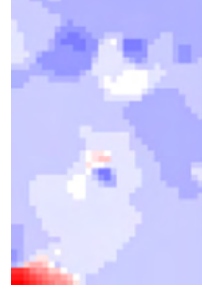

CAAGA+TCTTG

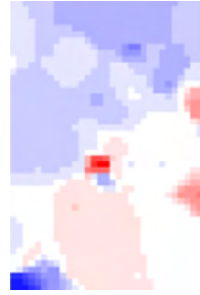

CAAGC+GCTTG

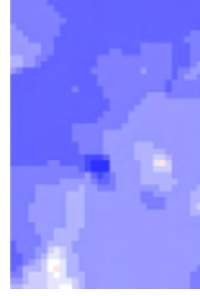

CAAGG+CCTTG

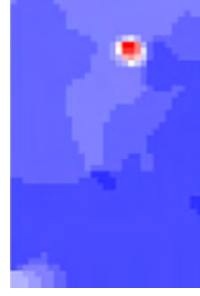

CAATA+TATTG

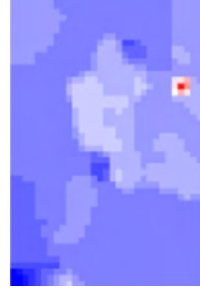

CAATC+GATTG

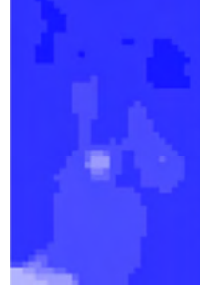

CAATG+CATTG

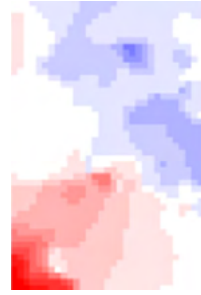

CACAA+TTGTG

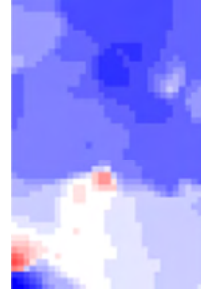

CACAC+GTGTG

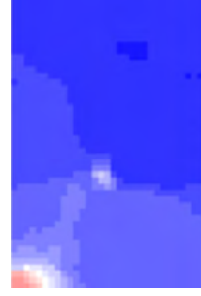

CACAG+CTGTG

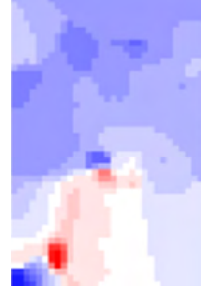

CACCA+TGGTG

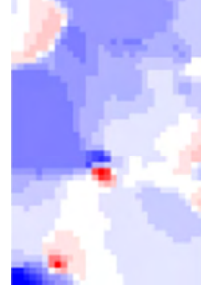

CACCC+GGGTG

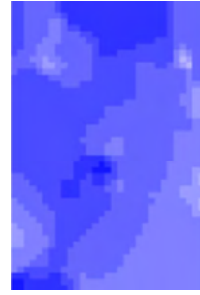

CACCG+CGGTG

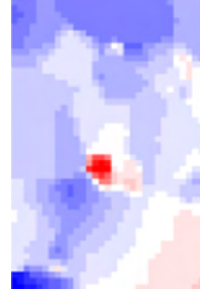

CACGA+TCGTG

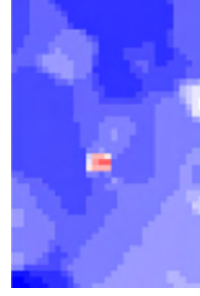

CACGC+GCGTG

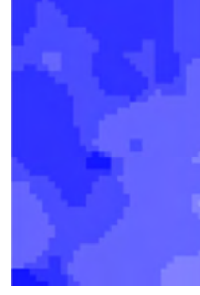

CACGG+CCGTG

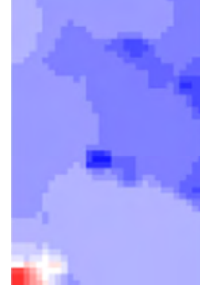

CACTA+TAGTG

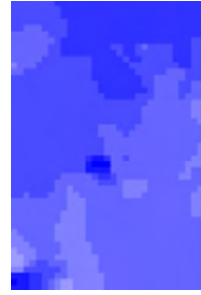

CACTC+GAGTG

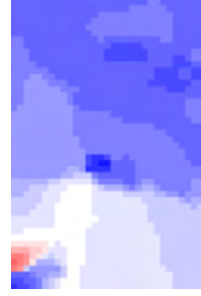

CACTG+CAGTG

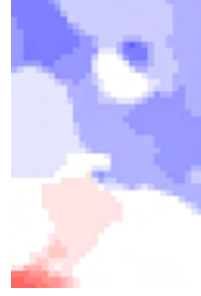

CAGAA+TTCTG

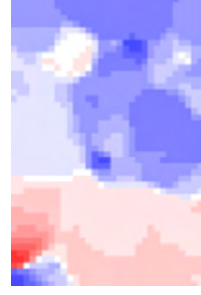

CAGAC+GTCTG

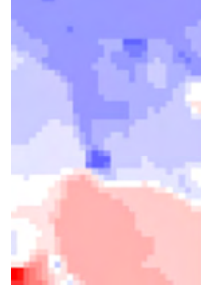

CAGAG+CTCTG

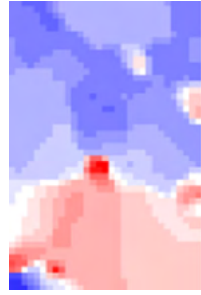

CAGCA+TGCTG

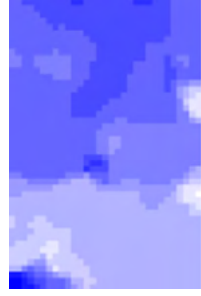

CAGCC+GGCTG

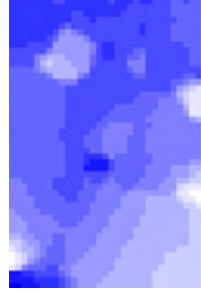

CAGCG+CGCTG

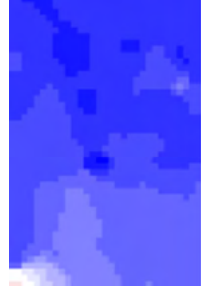

CAGGA+TCCTG

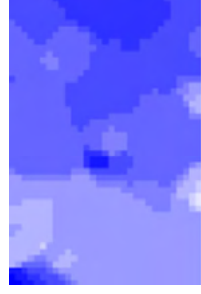

CAGGC+GCCTG

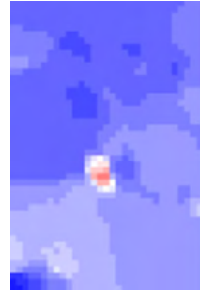

CAGGG+CCCTG

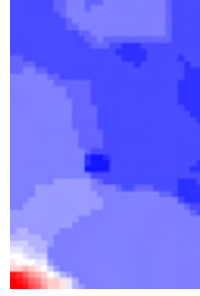

CAGTA+TACTG

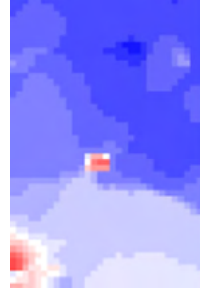

CAGTC+GACTG

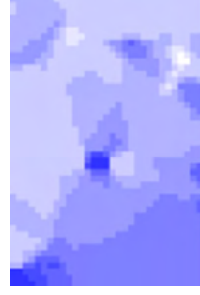

CATAA+TTATG

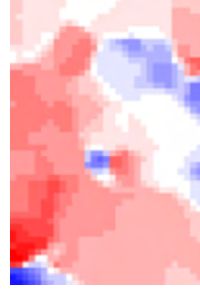

CATAC+GTATG

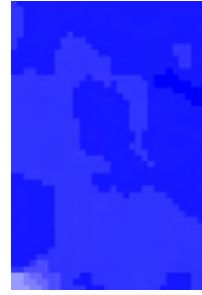

CATAG+CTATG

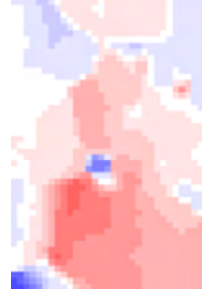

CATCA+TGATG

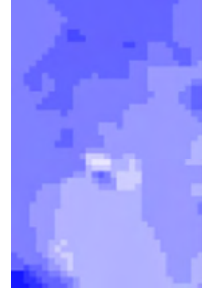

CATCC+GGATG

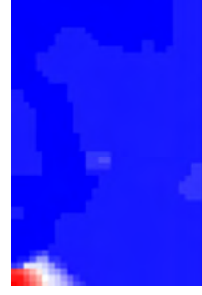

CATCG+CGATG

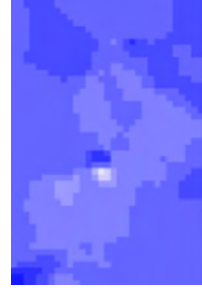

CATGA+TCATG

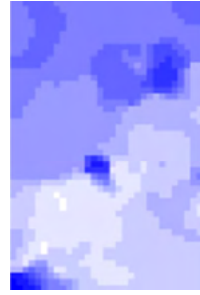

CATGC+GCATG

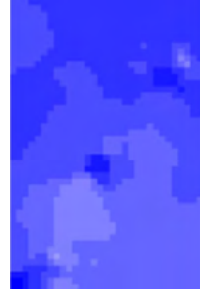

CATGG+CCATG

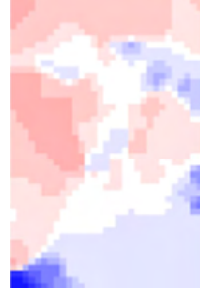

CATT+TAATG

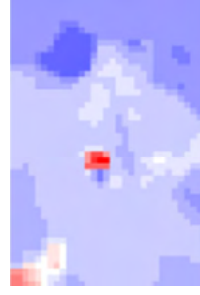

CATT+GAATG

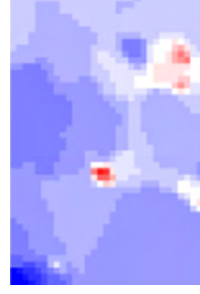

CAAAA+TTTTGG

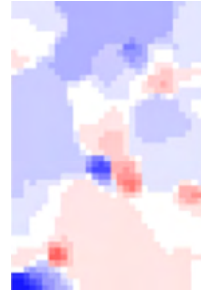

CCAAC+GTTGG

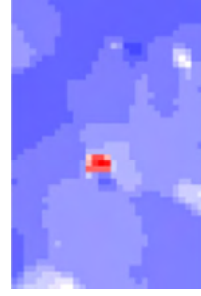

CCAAG+CTTGG

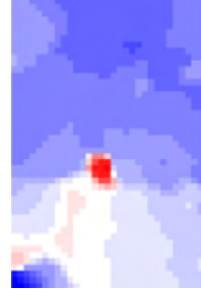

CCACA+TGTGG

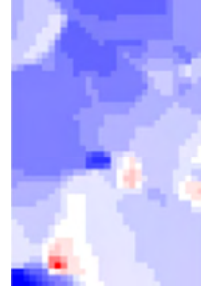

CCACC+GGTGG

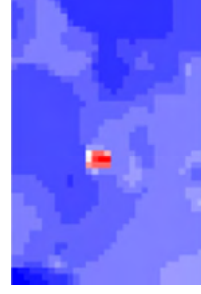

CCACG+CGTGG

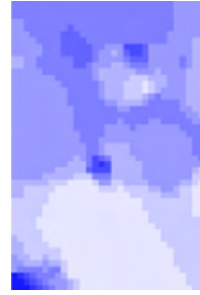

CCAGA+TCTGG

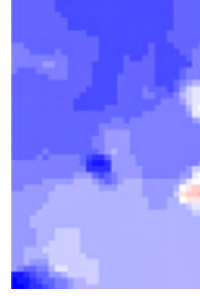

CCAGC+GCTGG

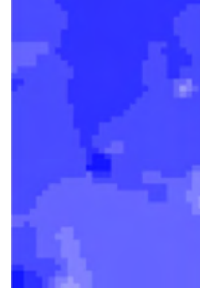

CCAGG+CCTGG

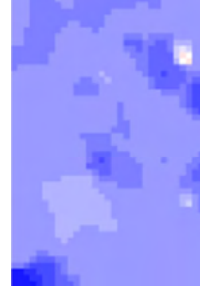

CCATA+TATGG

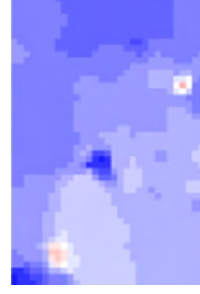

CCATC+GATGG



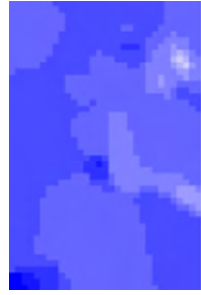

CCCAA+TTGGG

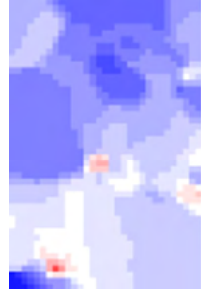

CCCAC+GTGGG

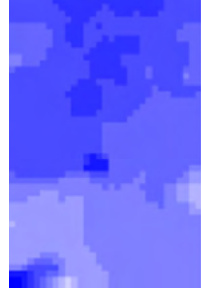

CCCAG+CTGGG

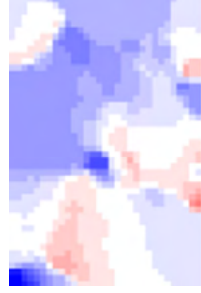

CCCCA+TGGGG

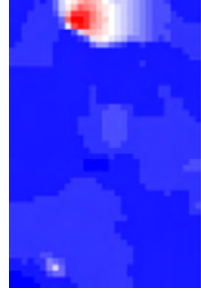

CCCCC+GGGGG

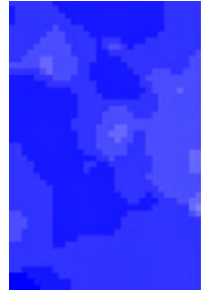

CCCCG+CGGGG

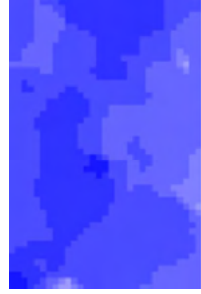

CCCGA+TGGGG

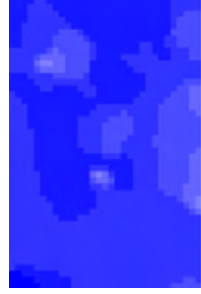

CCCCG+GCGGG

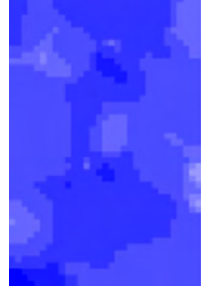

CCCCG+CCGGG

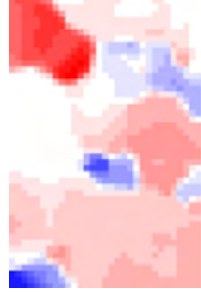

CCCTA+TAGGG

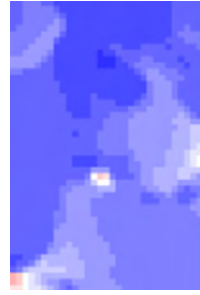

CCCTC+GAGGG

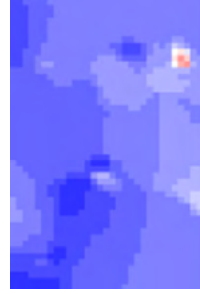

CCGAA+TTCGG

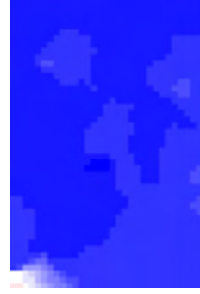

CCGAC+GTCGG

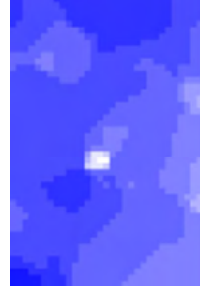

CCGAG+CTCGG

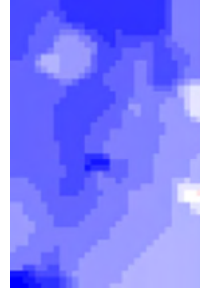

CCGCA+TGC GG

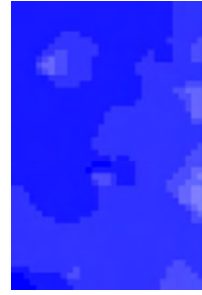

CCGCC+GGCGG

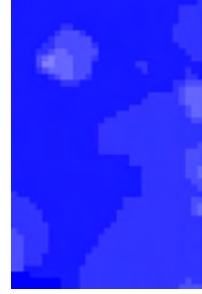

CCGCG+CGCGG

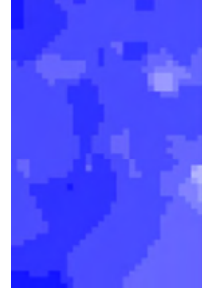

CCGGA+TCCGG

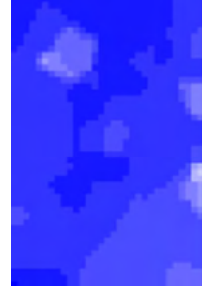

CCGGC+GCCGG

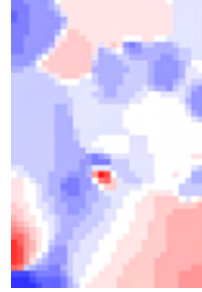

CCGTA+TAGGG

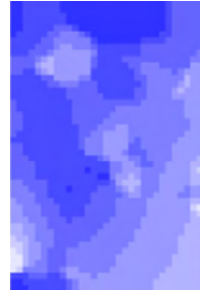

CCGTC+GACGG

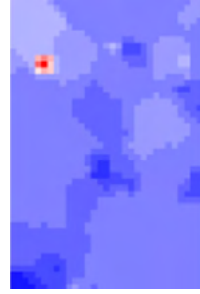

CCTAA+TTAGG

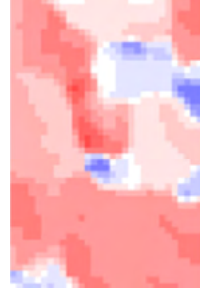

CCTAC+GTAGG

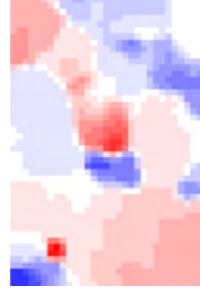

CCTAG+CTAGG

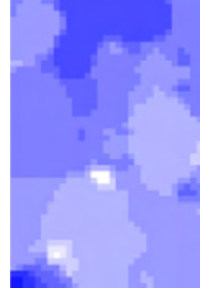

CCTCA+TGAGG

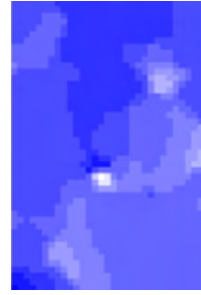

CCTCC+GGAGG

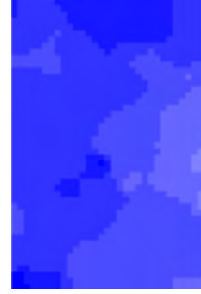

CCTCG+CGAGG

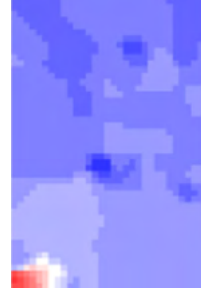

CCTGA+TCAGG

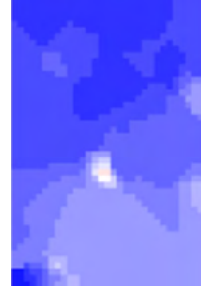

CCTGC+GCAGG

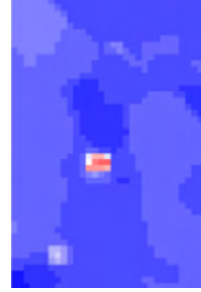

CCTTA+TAAGG

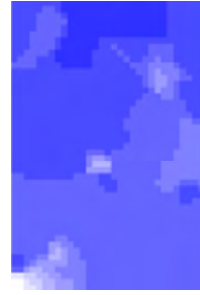

CCTTC+GAAGG

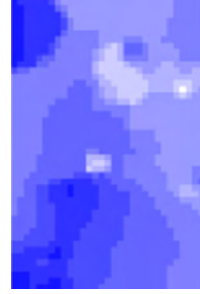

CGAAA+TTTCG

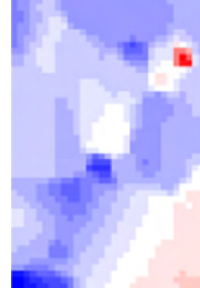

CGAAC+GTTCC

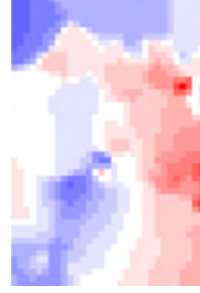

CGAAG+CTTCC

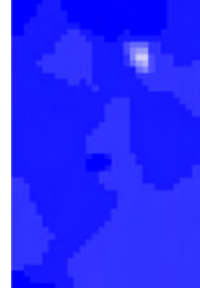

CGACA+TGTCG



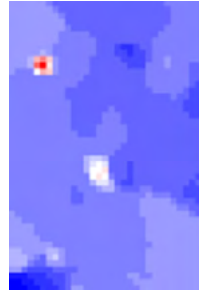

CTAAC+GTTAG

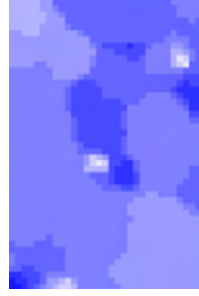

CTAAG+CTTAG

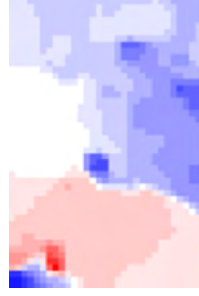

CTACA+TGTAG

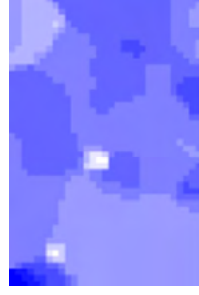

CTACC+GGTAG

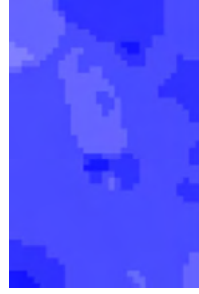

CTAGA+TCTAG

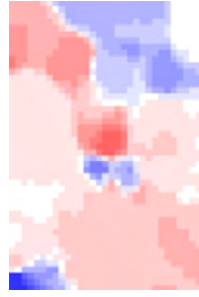

CTAGC+GCTAG

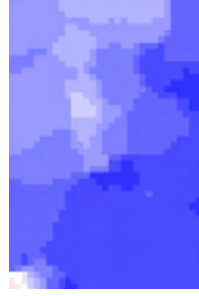

CTATA+TATAG

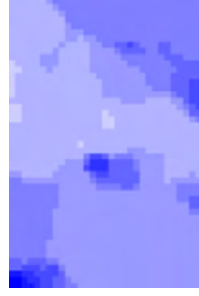

CTATC+GATAG

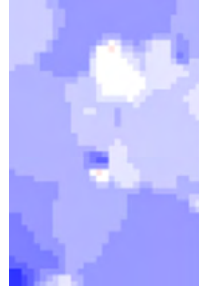

CTCAA+TTGAG

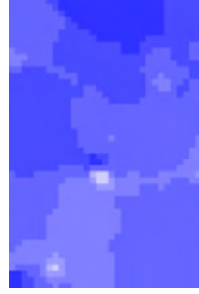

CTCAC+GTGAG

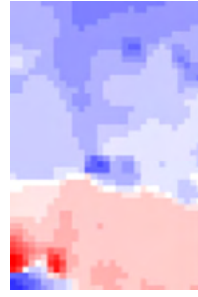

CTCAG+CTGAG

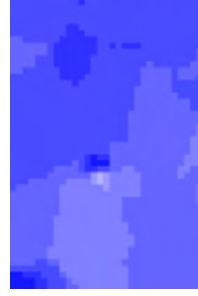

CTCCA+TGGAG

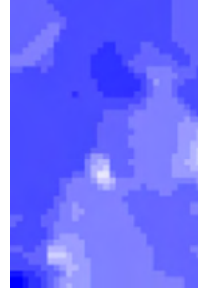

CTCTC+GAGAG

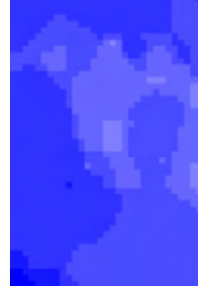

CTCCC+GGGAG

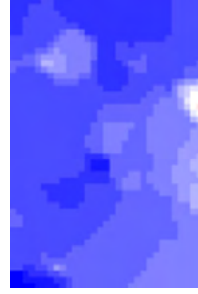

CTCGC+GCGAG

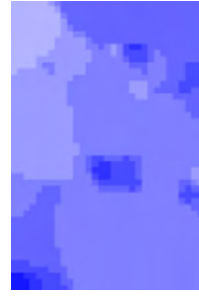

CTCTA+TAGAG

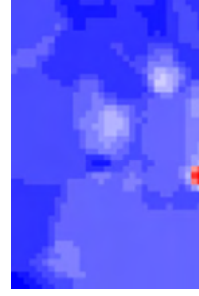

CTCTC+GAGAG

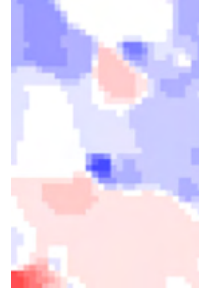

CTGAA+TTCAG

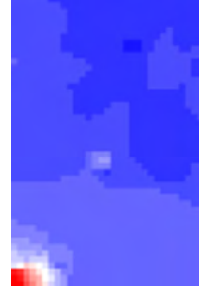

CTGAC+GTCAG

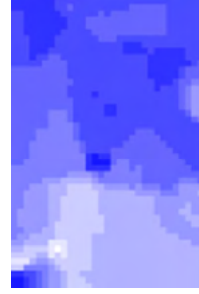

CTGCA+TGCAG

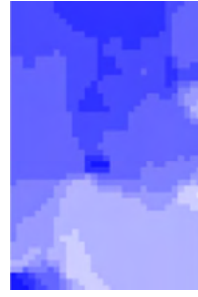

CTGCC+GGCAG

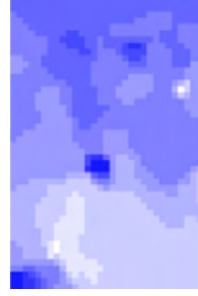

CTGGA+TCCAG

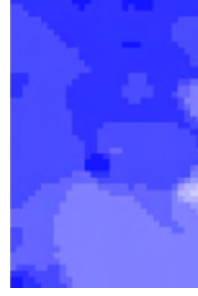

CTGGC+GCCAG

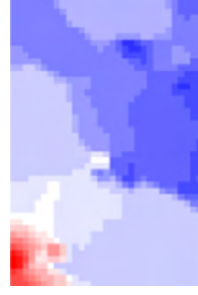

CTGTA+TACAG

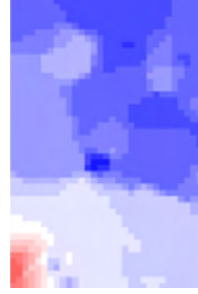

CTGTC+GACAG

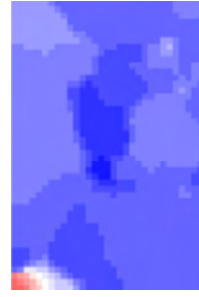

CTTAA+TTAAG

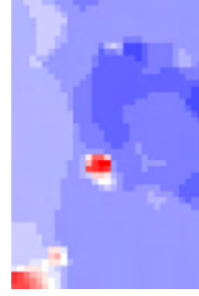

CTTAC+GTAAG

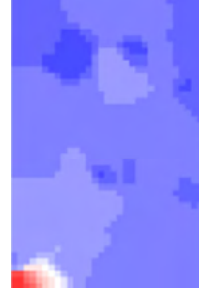

CTTCA+TGAAG

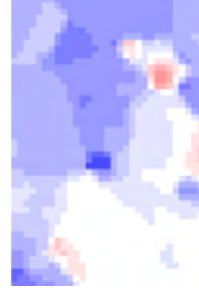

CTTCC+GGAAG

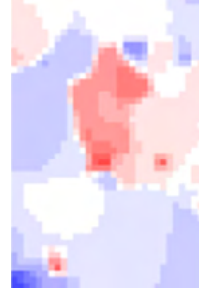

CTTGA+TCAAG

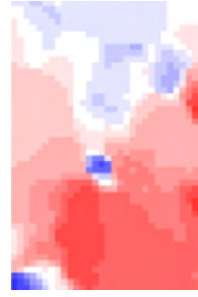

CTTGC+GCAAG

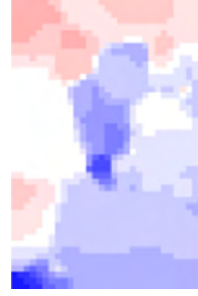

CTTTA+TAAAG

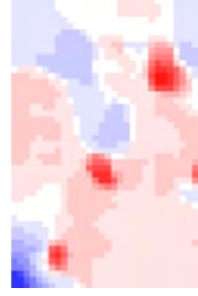

CTTTC+GAAAG

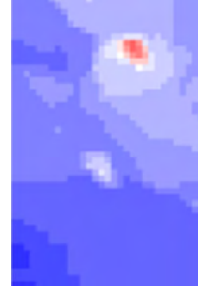

GAAAA+TTTTTC

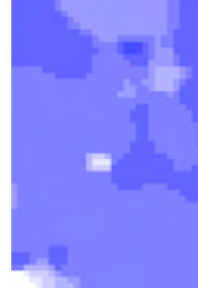

GAAAC+GTTTC

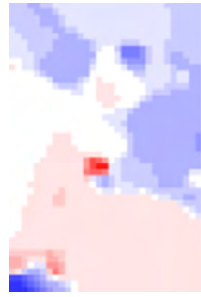

GAACA+TGTTTC

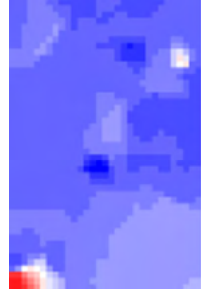

GAACC+GGTTC

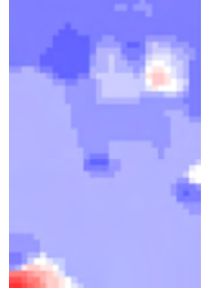

GAAGA+TCCTTC

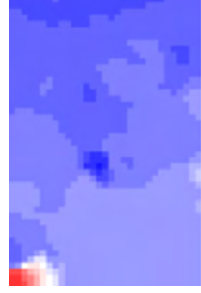

GAAGC+GCTTC

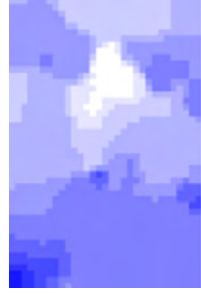

GAATA+TATTC

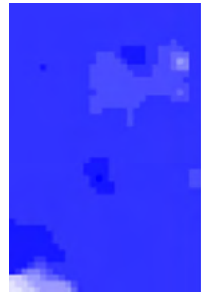

GAATC+GATTC

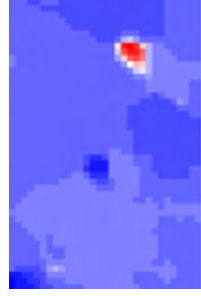

GACAA+TTGTC

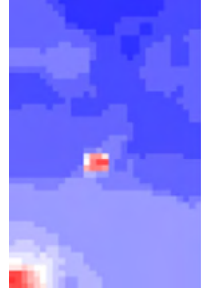

GACAC+GTGTC

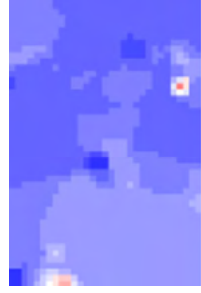

GACCA+TGGTC

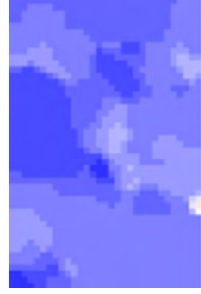

GACCC+GGGTC

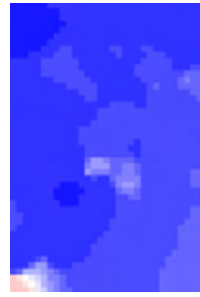

GACGA+TCGTC

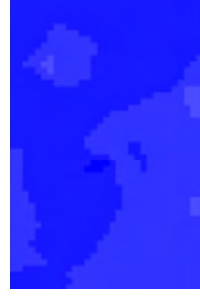

GACGC+GCGTC

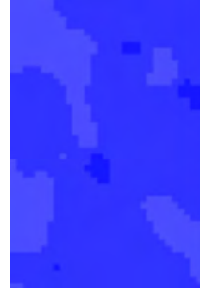

GACTA+TAGTC

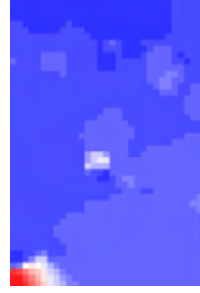

GACTC+GAGTC

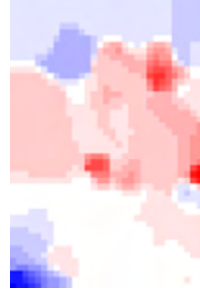

GAGAA+TTCTC

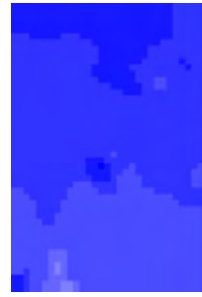

GAGAC+GTCTC

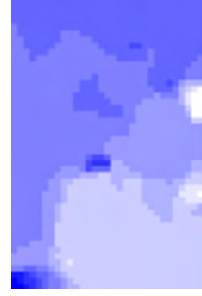

GAGCA+TGCTC

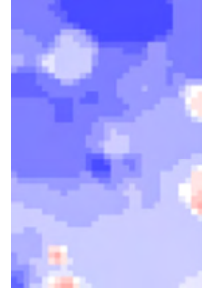

GAGCC+GGCTC

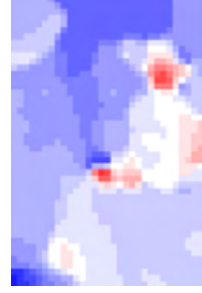

GAGGA+TCCTC

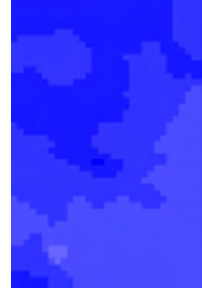

GAGGC+GCCTC

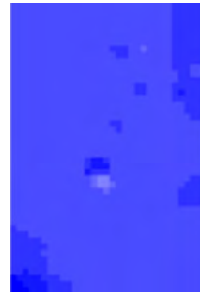

GAGTA+TACTC

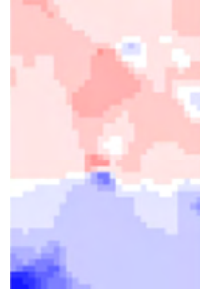

GATAA+TTATC

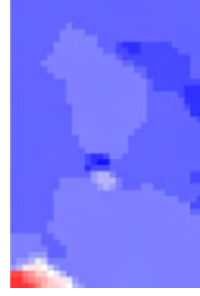

GATAC+GTATC

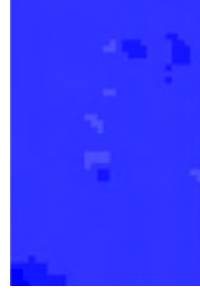

GATCA+TGATC

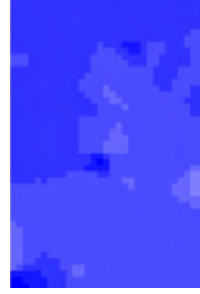

GATCC+GGATC

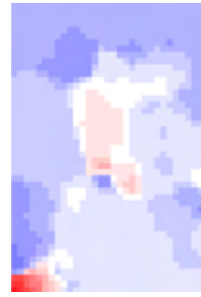

GATGA+TCATC

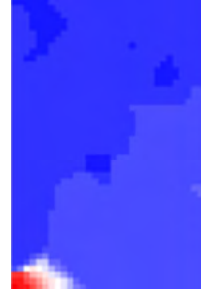

GATGC+GCATC

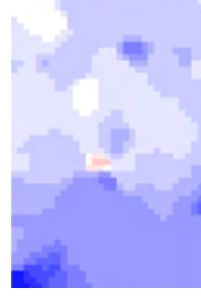

GATTA+TAATC

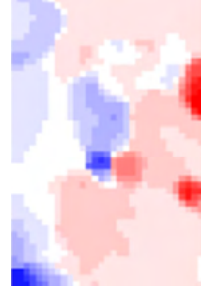

GCAAA+TTTGC

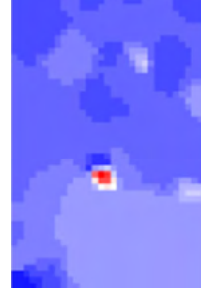

GCAAC+GTTGC

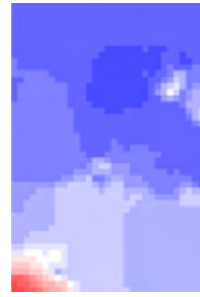

GCACA+TGTGC

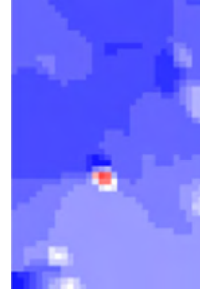

GCACC+GGTGC

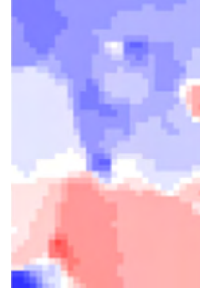

GCAGA+TCTGC

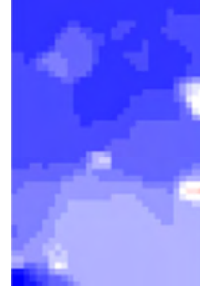

GCAGC+GCTGC

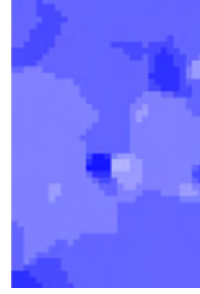

GCATA+TATGC



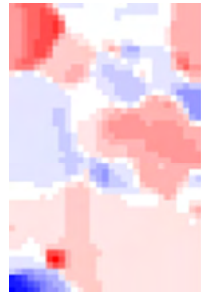

GGGTA+TACCC

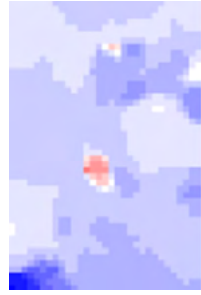

GGTAA+TTACC

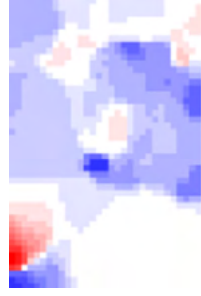

GGTAC+GTACC

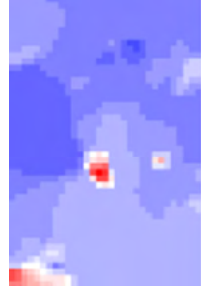

GGTCa+TGACC

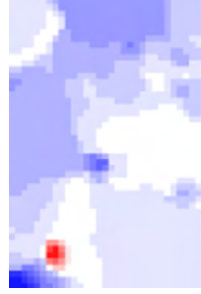

GGTGA+TCACC

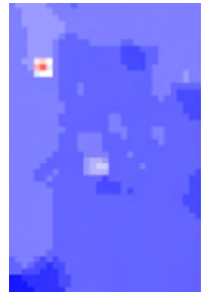

GGTTA+TAACC

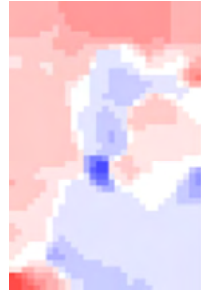

GTAAA+TTTAC

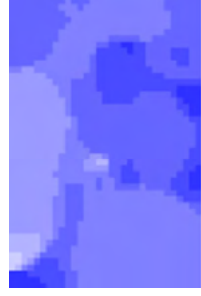

GTAAC+GTTAC

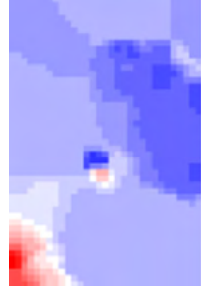

GTACA+TGTAC

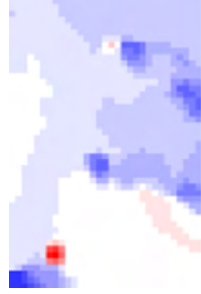

GTAGA+TCTAC

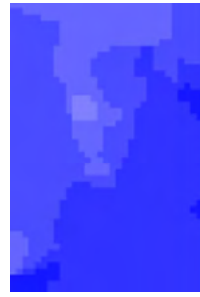

GTATA+TATAC

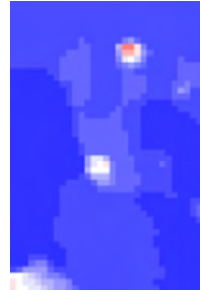

GTCAA+TTGAC

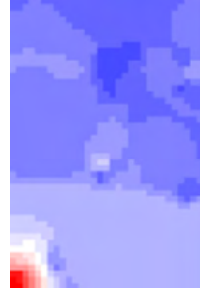

GTCAC+GTGAC

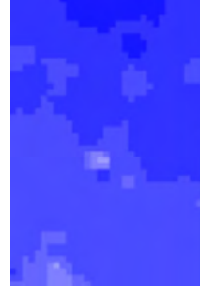

GTCCA+TGGAC

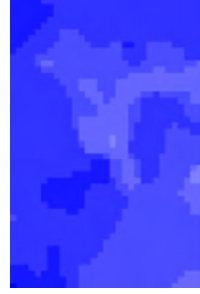

GTCGA+TCGAC

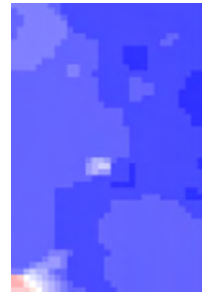

GTCCTA+TAGAC

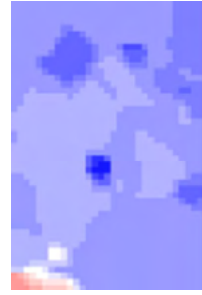

GTGAA+TTCAC

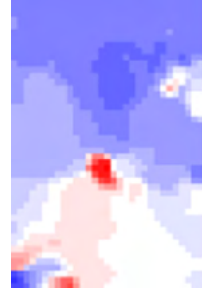

GTGCA+TGCAC

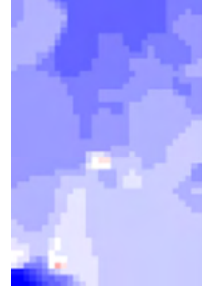

GTGGA+TCCAC

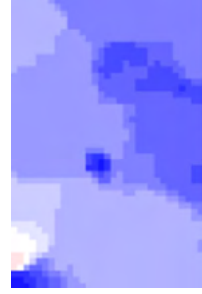

GTGTA+TACAC

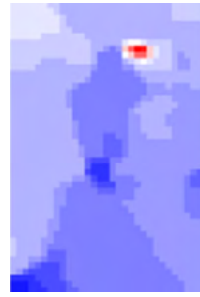

GTTAA+TTAAC

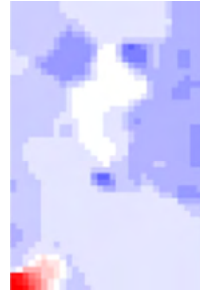

GTTCA+TGAAC

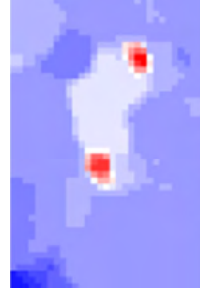

GTTGA+TCAAC

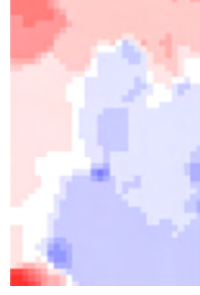

GTTTA+TAAAC

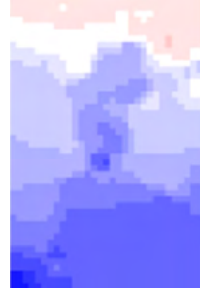

TAAAA+TTTTA

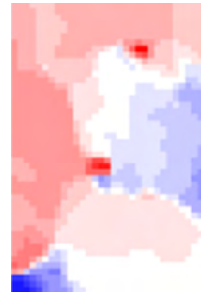

TAACA+TGTTA

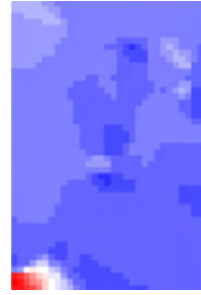

TAAGA+TCTTA

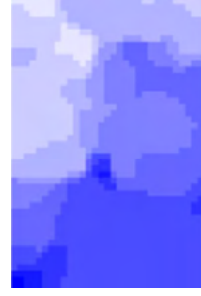

TAATA+TATTA

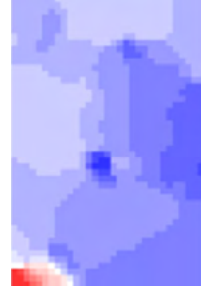

TACAA+TTGTA

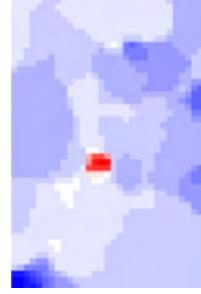

TACCA+TGGTA

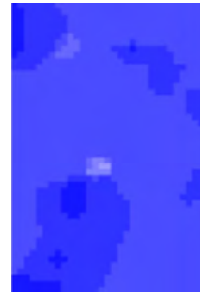

TACGA+TCGTA

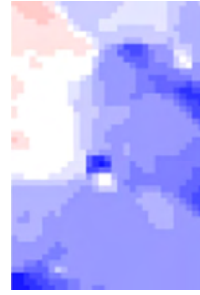

TACTA+TAGTA

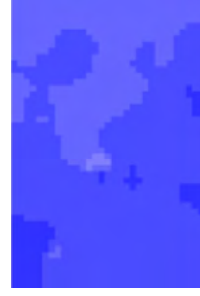

TAGAA+TTCTA

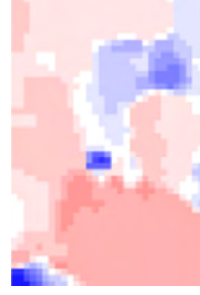

TAGCA+TGCTA

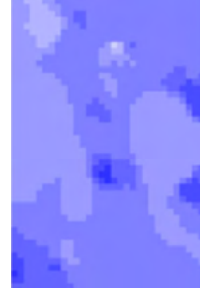

TAGGA+TCCTA
