# Supplementary material for: Unsupervised AI reveals insect species-specific genome signatures
Source: PeerJ journal article supplement (doi:10.7717/peerj.17025), 2024-03-06
Supplement: Data_S2.pdf [file Data_S2.pdf]

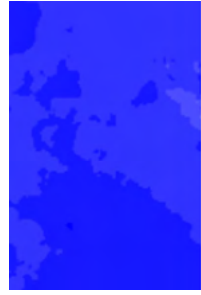

AAAAG+CTTTT

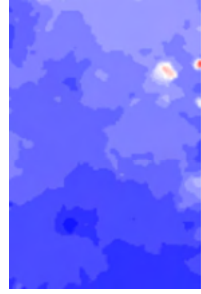

AAAAT+ATTTT

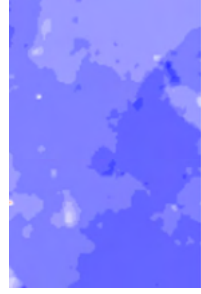

AAACA+TGTTT

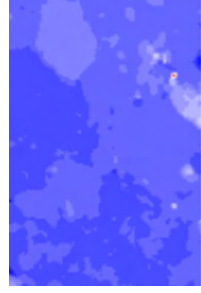

AAACC+GGTTT

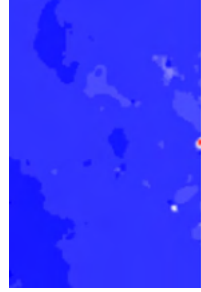

AAACG+CGTTT

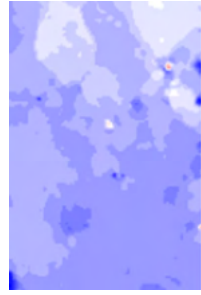

AAACT+AGTTT

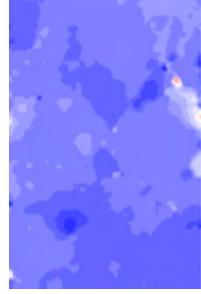

AAAGA+TCTTT

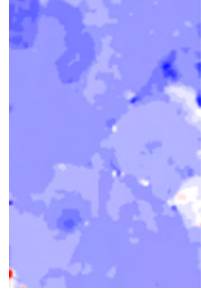

AAAGC+GCTTT

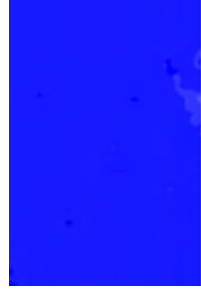

AAAGG+CCTTT

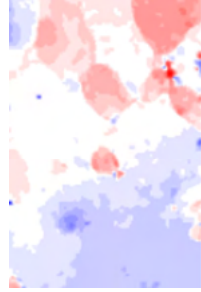

AAAGT+ACTTT

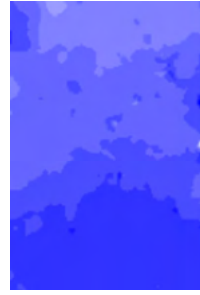

AAATA+TATTT

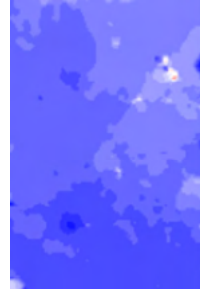

AAATC+GATTT

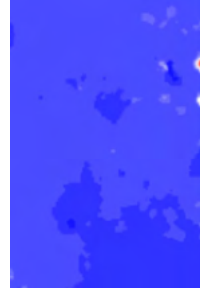

AAATG+CATTT

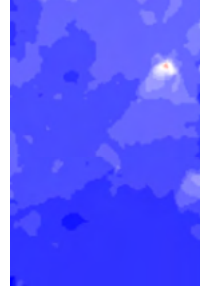

AAATT+AAATTT

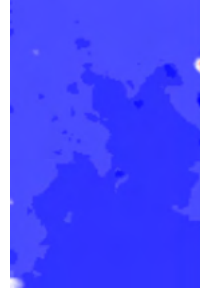

AACAA+TTGTT

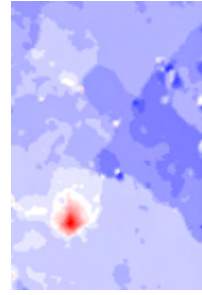

AACAC+GTGTT

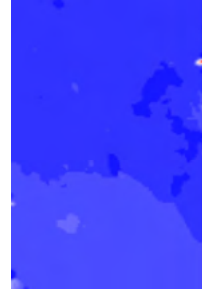

AACAG+CTGTT

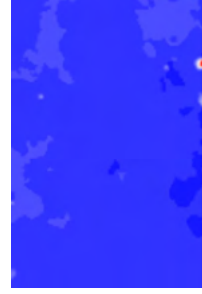

AACAT+ATGTT

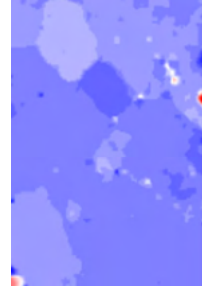

AACCA+TGGTT

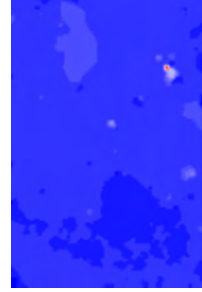

AACCC+GGGTT

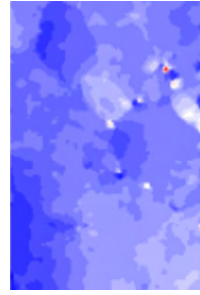

AACCG+CGGTT

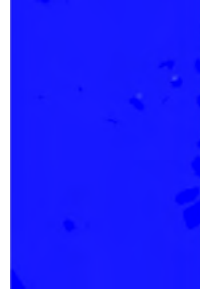

AACCT+AGGTT

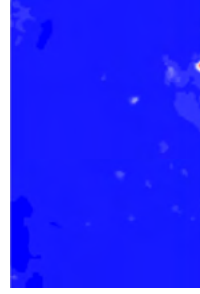

AACGA+TCGTT

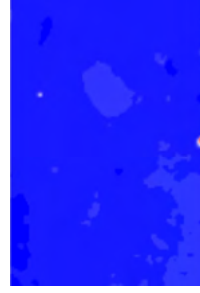

AACGC+GCGTT

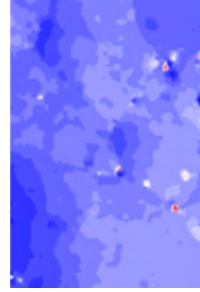

AACGG+CCGTT

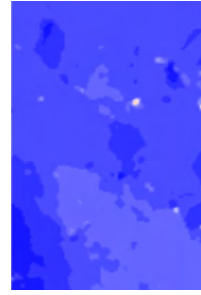

AACGT+ACGTT

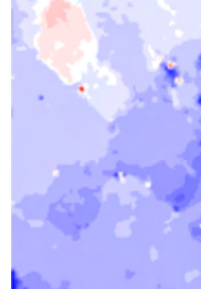

AACTA+TAGTT

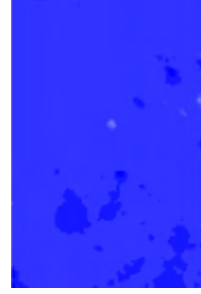

AACTC+GAGTT

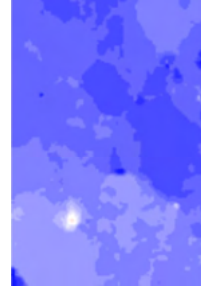

AACCT+AAAGTT

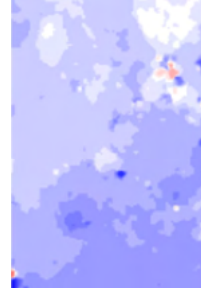

AACCA+TGCTT

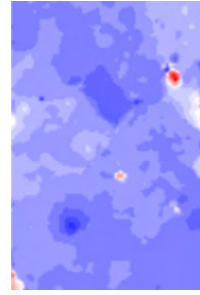

AAGAA+TTCTT

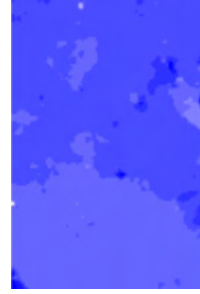

AAGAC+GTCCT

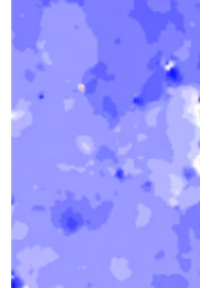

AAGAG+CTCCT

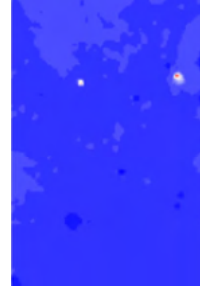

AAGAT+ATCCT







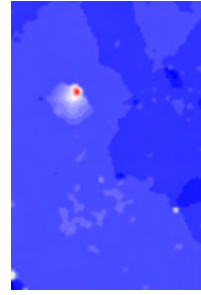

ACTAC+GTAGT

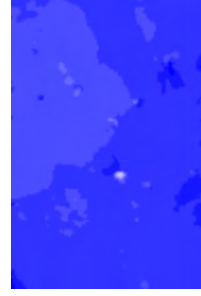

ACTAG+CTAGT

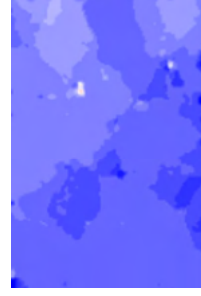

ACTAT+ATAGT

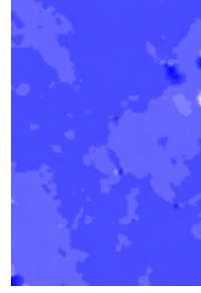

ACTCA+TGAGT

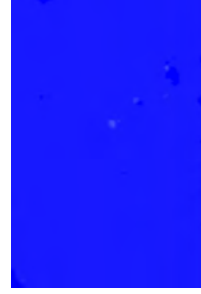

ACTCC+GGAGT

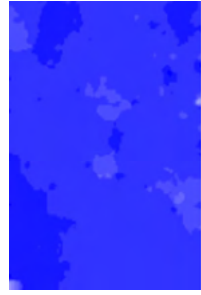

ACTCG+CGAGT

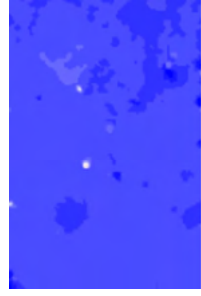

ACTCT+AGAGT

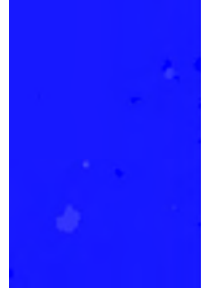

ACTGA+TCAGT

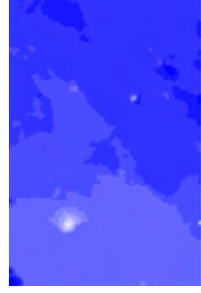

ACTGC+GCAGT

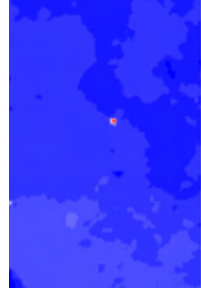

ACTGG+CCAGT

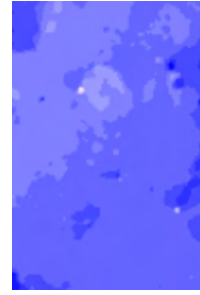

ACTTA+TAAGT

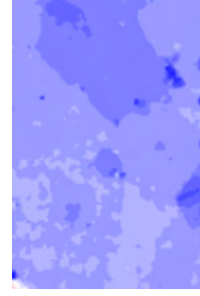

ACTTC+GAAGT

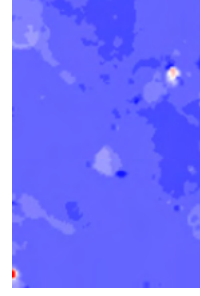

ACTTG+CAAGT

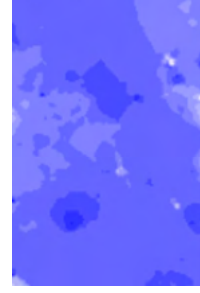

AGAAA+TTTCT

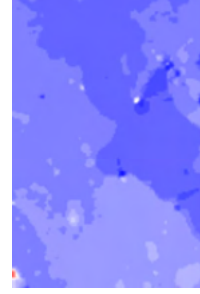

AGAAC+GTTCT

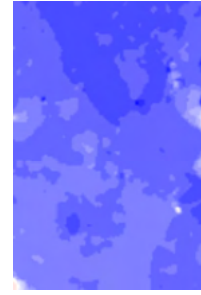

AGAAG+CTTCT

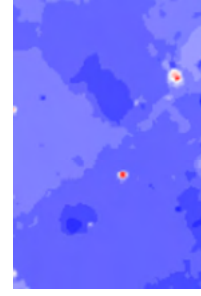

AGAAT+ATTCT

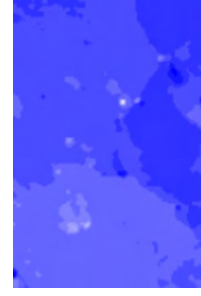

AGACA+TGTCT

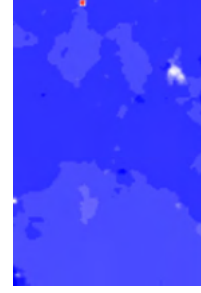

AGACC+GGTCT

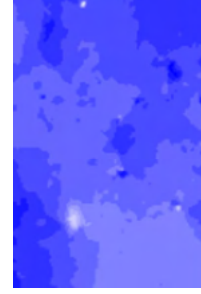

AGACG+CGTCT

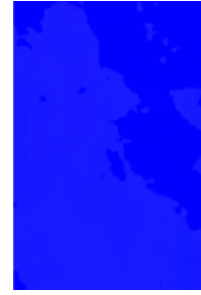

AGACT+AGTCT

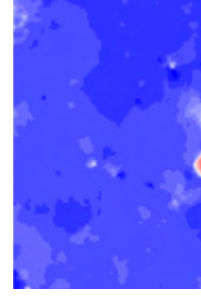

AGAGA+TCTCT

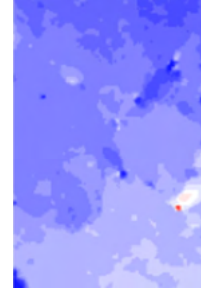

AGAGC+GCTCT

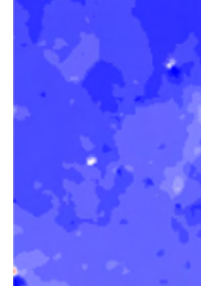

AGAGG+CCTCT

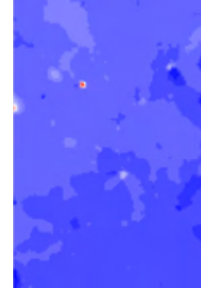

AGATA+TATCT

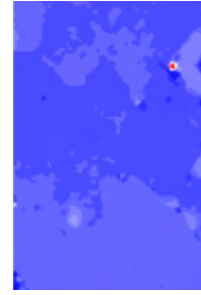

AGATC+GATCT

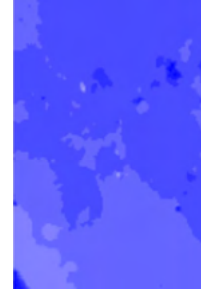

AGATG+CATCT

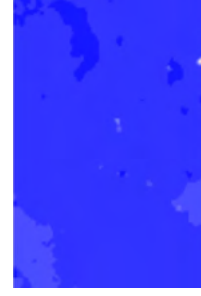

AGCAA+TTGCT

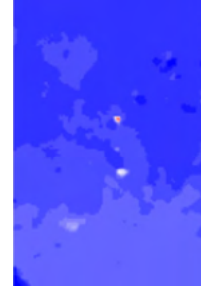

AGCAC+GTGCT

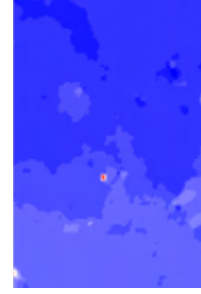

AGCAG+CTGCT

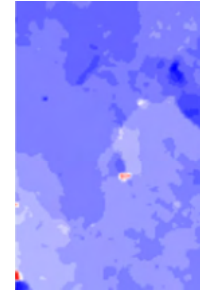

AGCAT+ATGCT

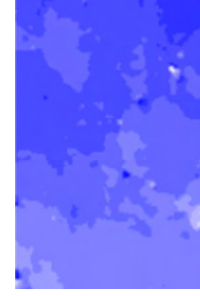

AGCCA+TGGCT

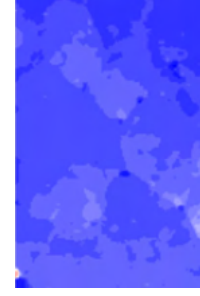

AGCCG+GGGCT

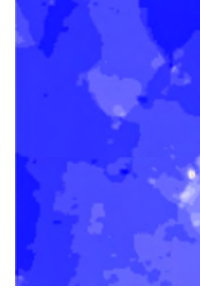

AGCCG+CGGCT

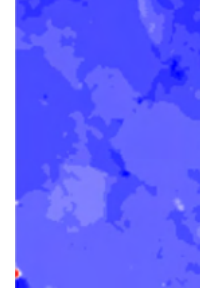

AGCCT+AGGCT



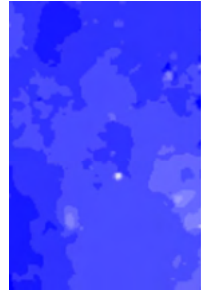

AGCGA+TCGCT

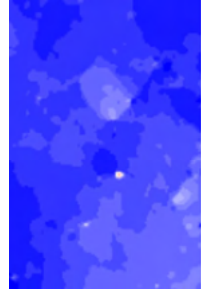

AGCGC+GCGCT

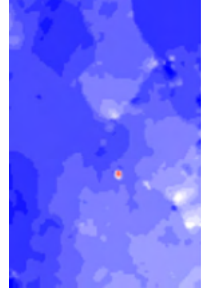

AGCGG+CCGCT

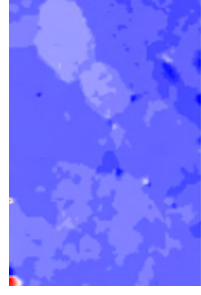

AGCTA+TAGCT

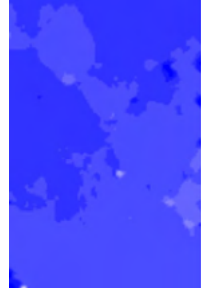

AGCTC+GAGCT

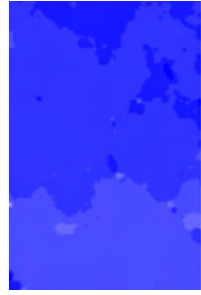

AGCTG+CAGCT

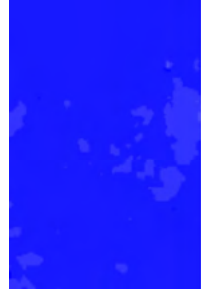

AGGAA+TTCCT

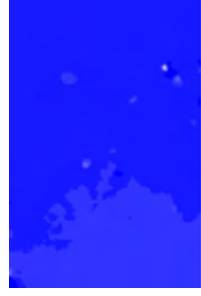

AGGAC+GTCCT

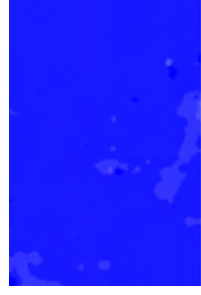

AGGAG+CTCCT

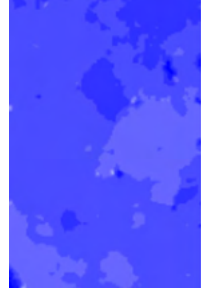

AGGAT+ATCCT

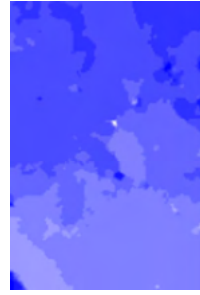

AGGCA+TGCCT

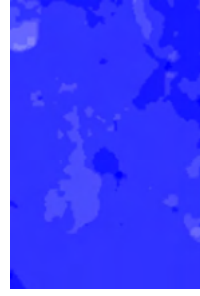

AGGCC+GGCCT

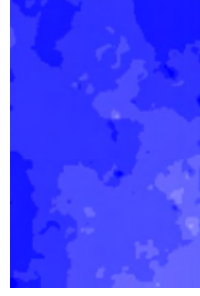

AGGCG+CGCCT

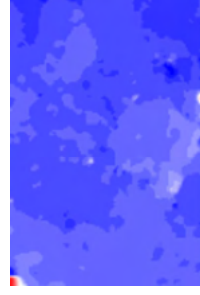

AGGGA+TCCCT

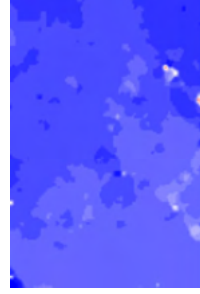

AGGGC+GCCCT

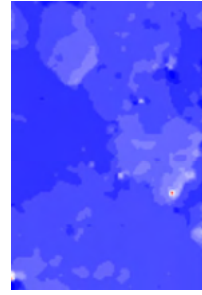

AGGGG+CCCCT

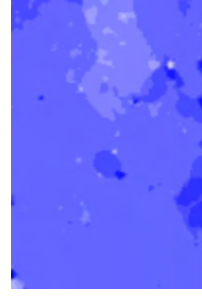

AGGTA+TACCT

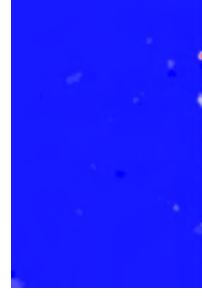

AGGTC+GACCT

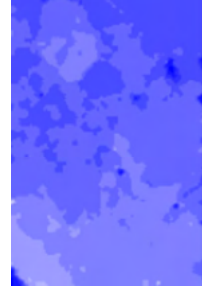

AGGTG+CACCT

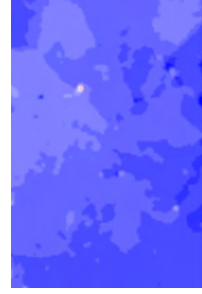

AGTAA+TTACT

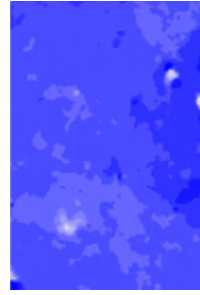

AGTAC+GTACT

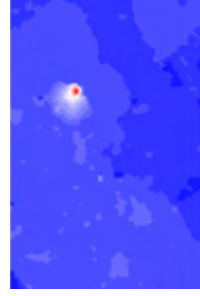

AGTAG+CTACT

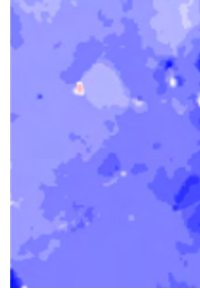

AGTAT+ATACT

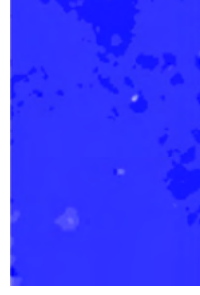

AGTCA+TGACT

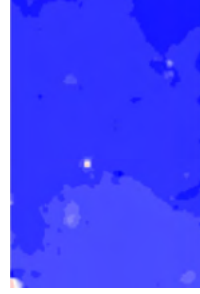

AGTCC+GGACT

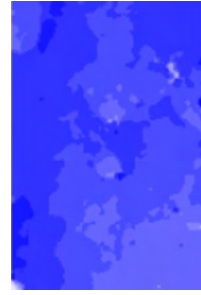

AGTCG+CGACT

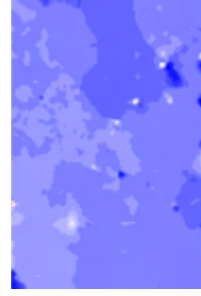

AGTGA+TCACT

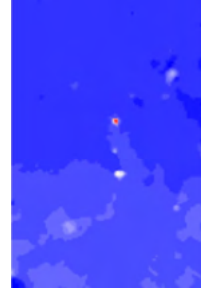

AGTGC+GCACCT

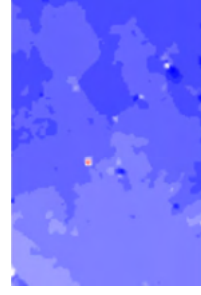

AGTGG+CCACT

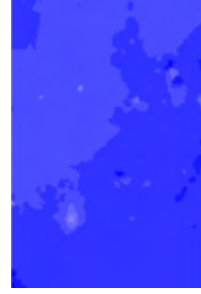

AGTTA+TAACCT

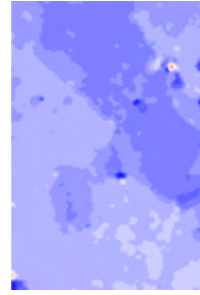

AGTTC+GAACCT

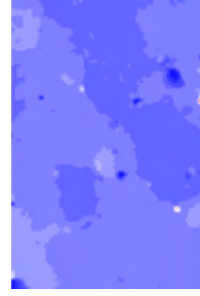

AGTTG+CAACCT

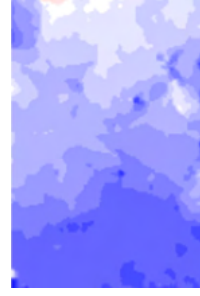

ATAAA+TTTAT

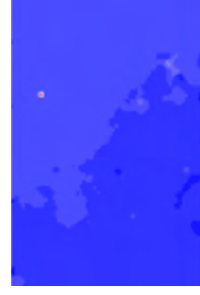

ATAAC+GTTAT

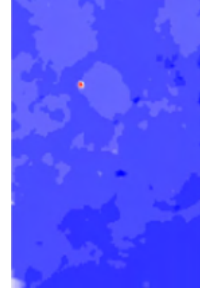

ATAAG+CTTAT







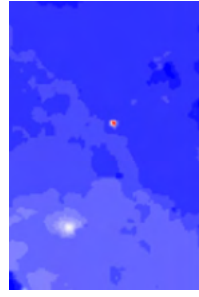

CACTG+CAGTG

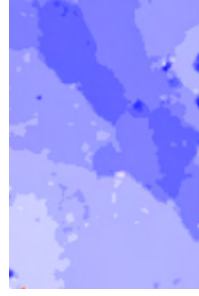

CAGAA+TTCTG

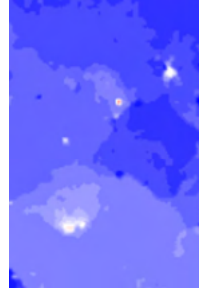

CAGAC+GTCTG

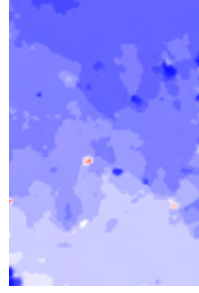

CAGAG+CTCTG

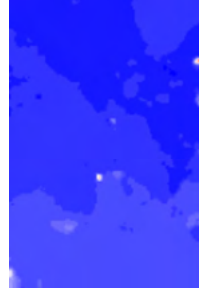

CAGCA+TGCTG

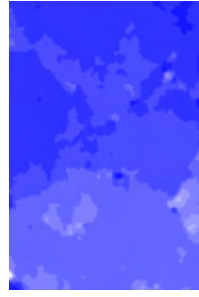

CAGCC+GGCTG

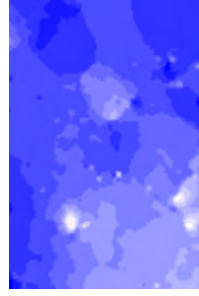

CAGCG+CGCTG

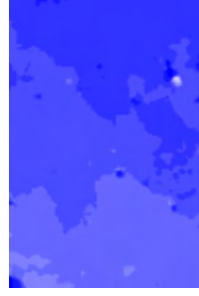

CAGGA+TCCTG

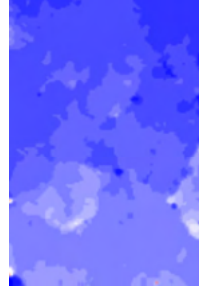

CAGGC+GCCTG

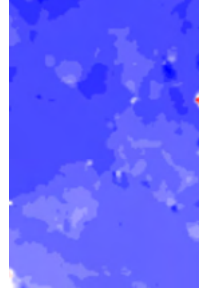

CAGGG+CCCTG

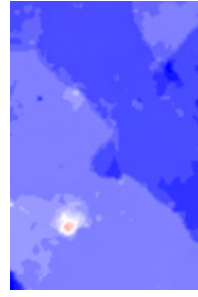

CAGTA+TACTG

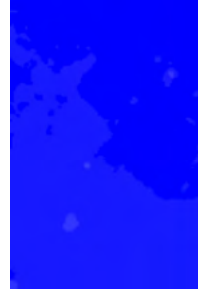

CAGTC+GACTG

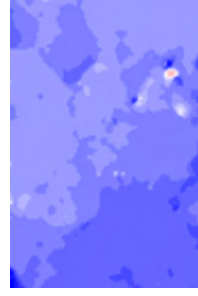

CATAA+TTATG

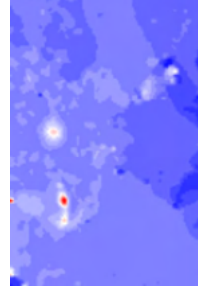

CATAC+GTATG

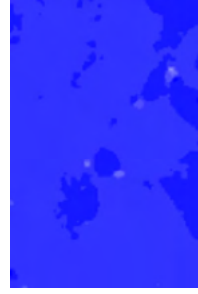

CATAG+CTATG

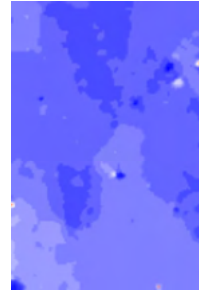

CATCA+TGATG

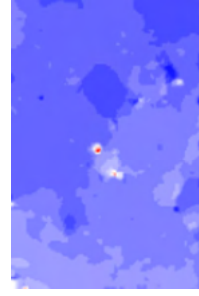

CATCC+GGATG

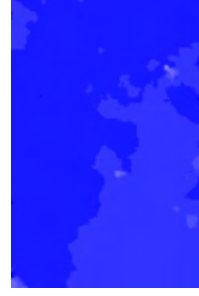

CATCG+CGATG

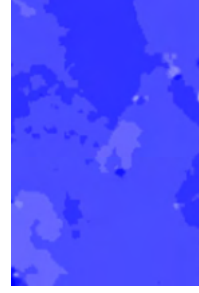

CATGA+TCATG

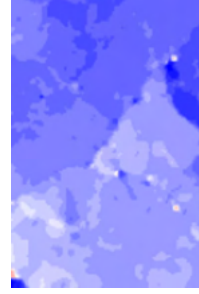

CATGC+GCATG

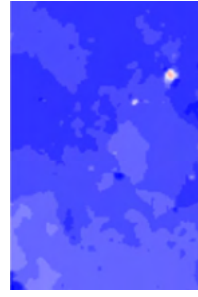

CATGG+CCATG

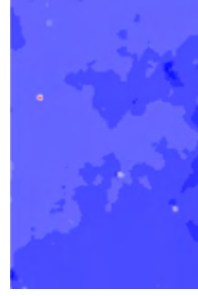

CATT+TAATG

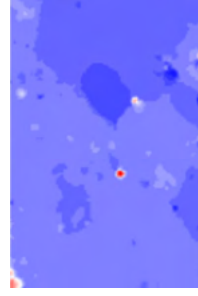

CATTG+GAATG

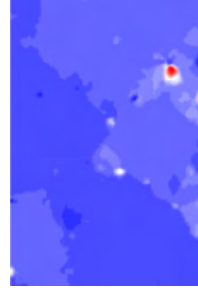

CAAAA+TTTGG

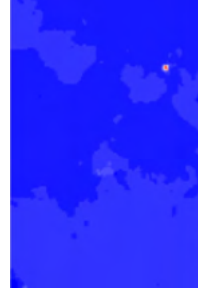

CCAAC+GTTGG

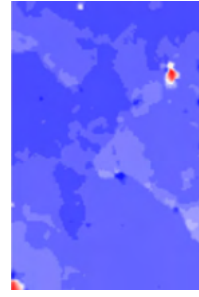

CCAAG+CTTGG

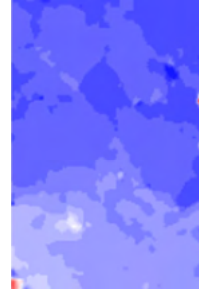

CCACA+TGTGG

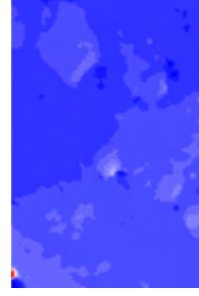

CCACC+GGTGG

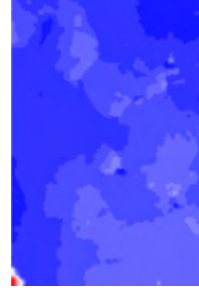

CCACG+CGTGG

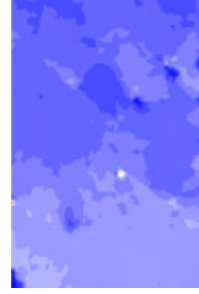

CCAGA+TCTGG

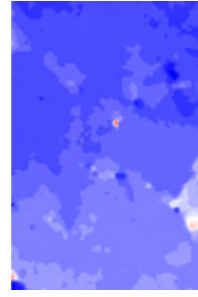

CCAGC+GCTGG

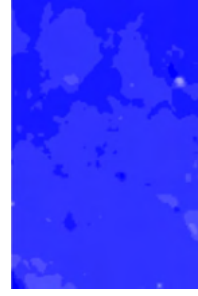

CCAGG+CCTGG

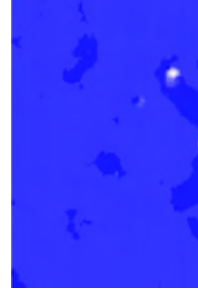

CCATA+TATGG

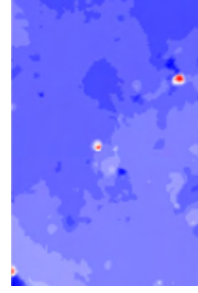

CCATC+GATGG

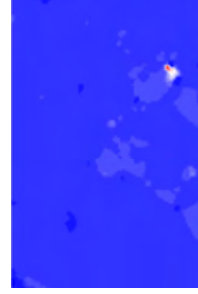

CCCAA+TTGGG



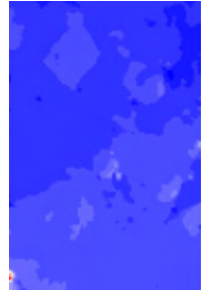

CCCCAC+GTGGG

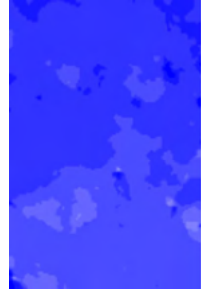

CCCAG+CTGGG

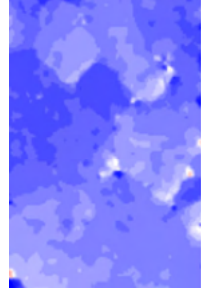

CCCCATA+TGGGG

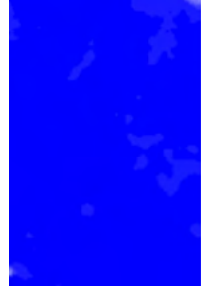

CCCCC+GGGGG

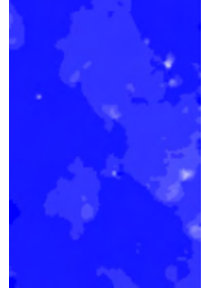

CCCCCG+CGGGG

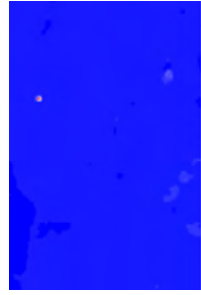

CCCGA+TCGGG

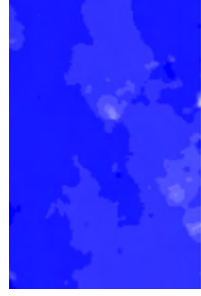

CCCGC+GCGGG

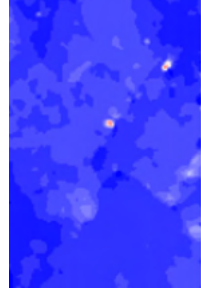

CCCAG+CCGGG

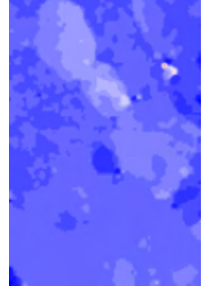

CCCTA+TAGGG

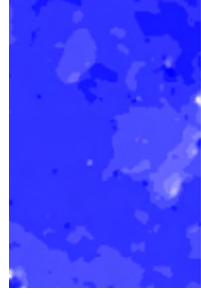

CCCTC+GAGGG

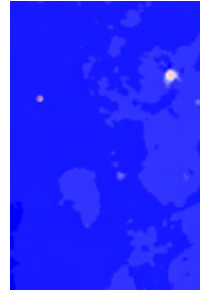

CCGAA+TTCGG

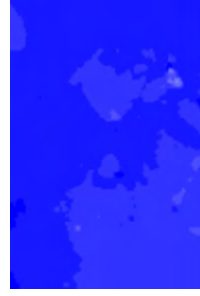

CCGAC+GTCGG

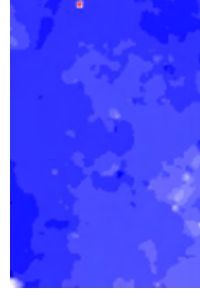

CCGAG+CTCGG

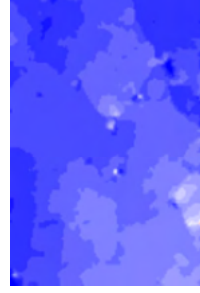

CCGCA+TGC GG

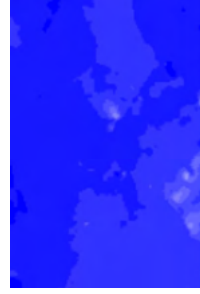

CCGCC+GGC GG

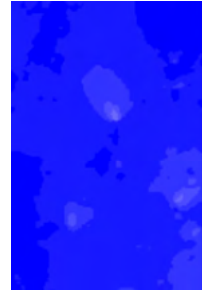

CCGCG+CGCGG

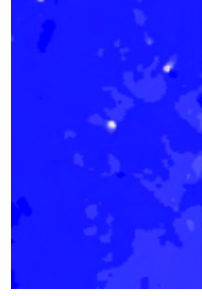

CCGGA+TCCGG

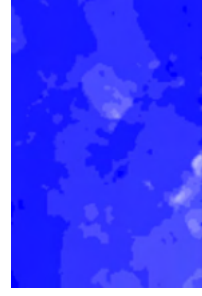

CCGGC+GCCGG

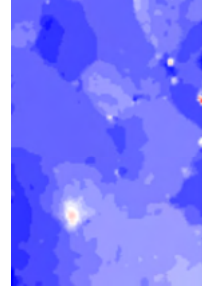

CCGTA+TACGG

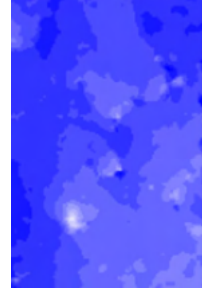

CCGTC+GACGG

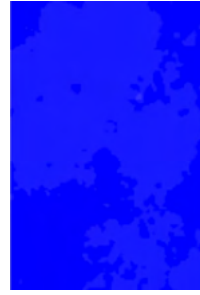

CCTAA+TTAGG

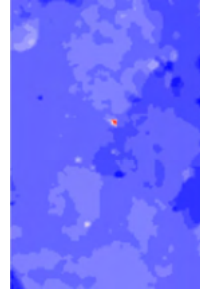

CCTAC+GTAGG

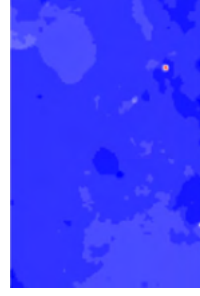

CCTAG+CTAGG

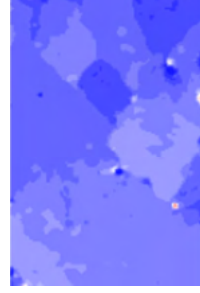

CCTCA+TGAGG

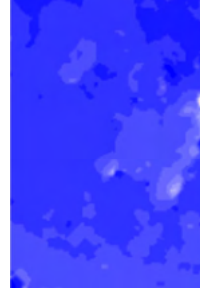

CCTCC+GGAGG

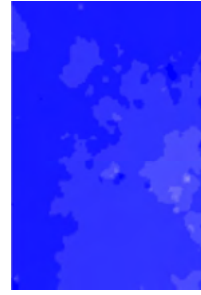

CCTCG+CGAGG

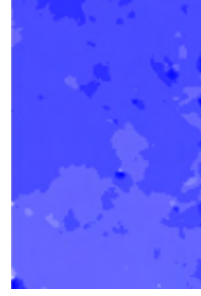

CCTGA+TCAGG

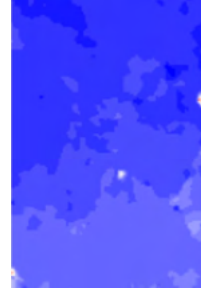

CCTGC+GCAGG

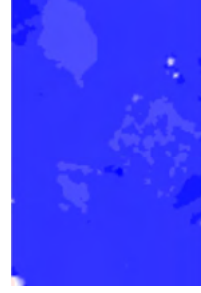

CCTTA+TAAGG

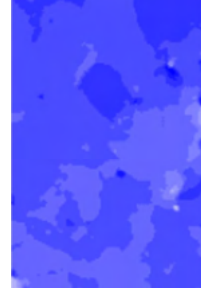

CCTTC+GAAGG

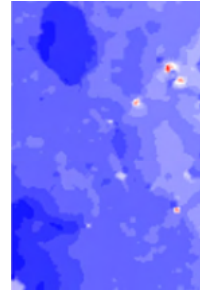

CGAAA+TTTCG

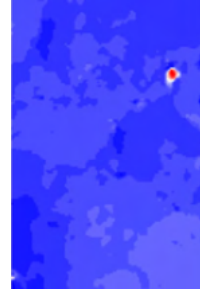

CGAAC+GTTCC

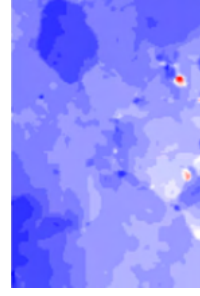

CGAAG+CTTCC

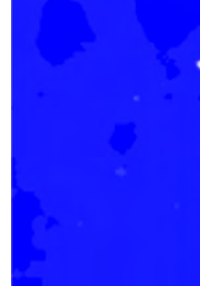

CGACA+TGTCG

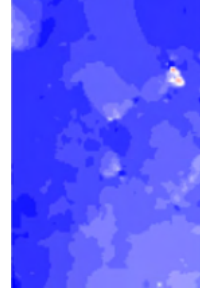

CGACC+GGTCC

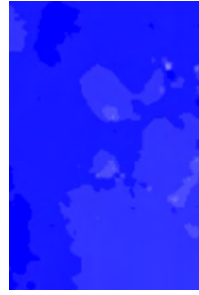

CGACG+CGTCC

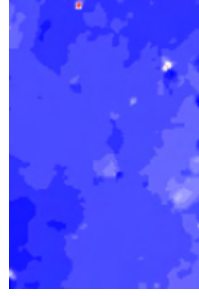

CGAGA+TCTCG

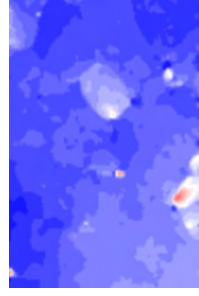

CGAGC+GCTCG

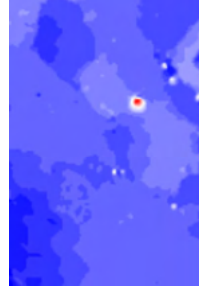

CGATA+TATCG

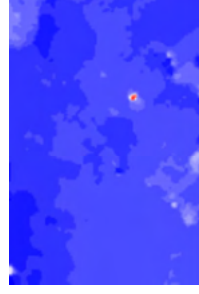

CGATC+GATCG

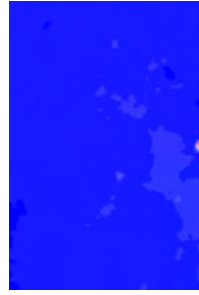

CGCAA+TTGCG

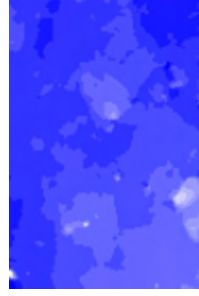

CGCAC+GTGCG

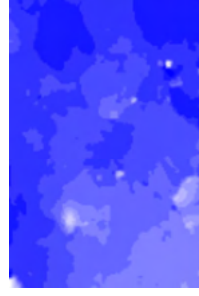

CGCAG+CTGCG

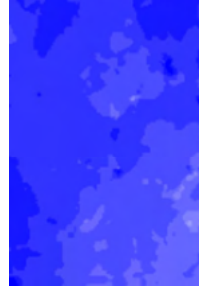

CGCCA+TGGCG

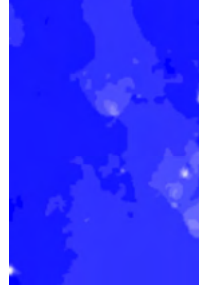

CGCCC+GGGCG

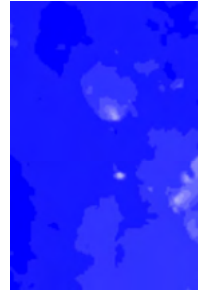

CGCCG+CGGCG

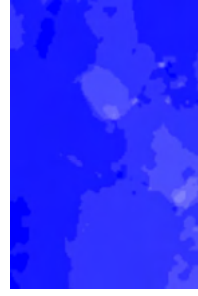

CGCGA+TCGCG

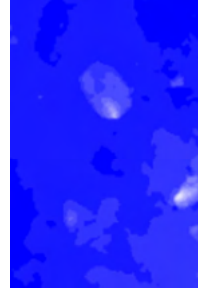

CGCGC+GCGCG

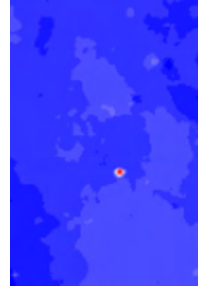

CGCTA+TAGCG

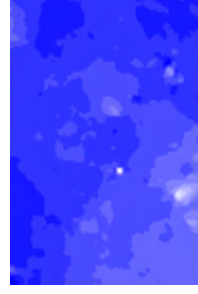

CGCTC+GAGCG

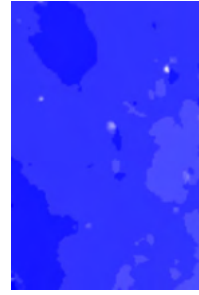

CGGAA+TTCCG

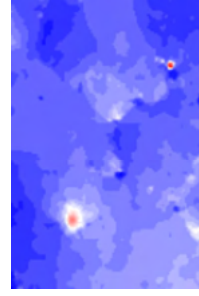

CGGAC+GTCCG

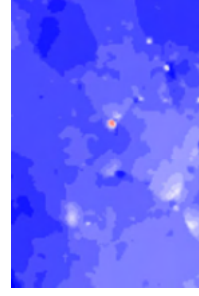

CGGAG+CTCCG

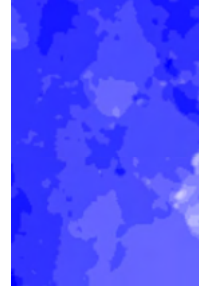

CGGCA+TGCCG

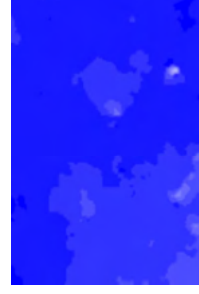

CGGCC+GGCCG

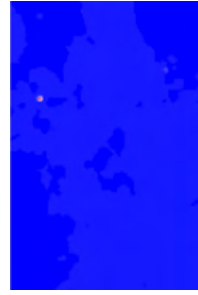

CGGGA+TCCCG

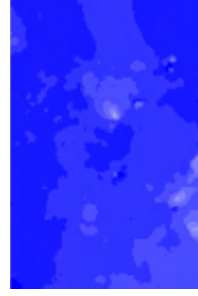

CGGGC+GCCCG

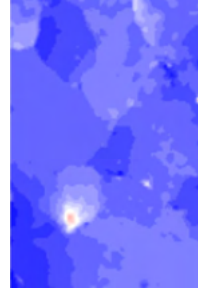

CGGTA+TACCG

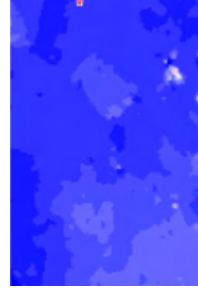

CGGTC+GACCG

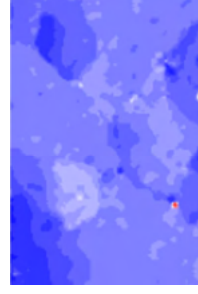

CGTAA+TTACG

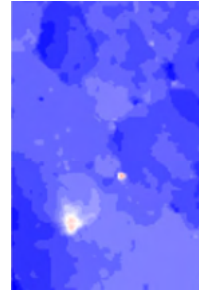

CGTAC+GTACG

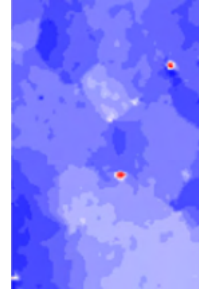

CGTAG+CTACG

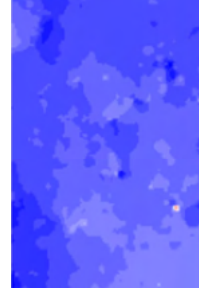

CGTCA+TGACG

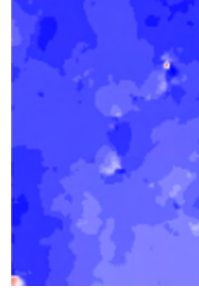

CGTCC+GGACG

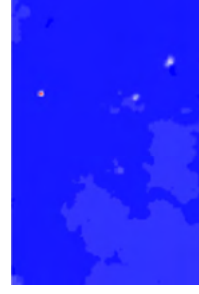

CGTGA+TCACG

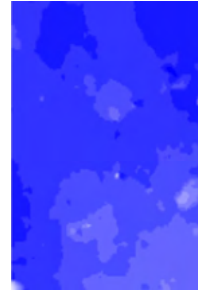

CGTGC+GCACG

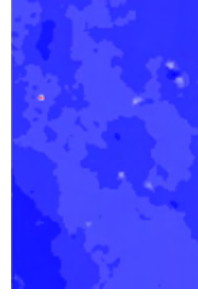

CGTTA+TAACG

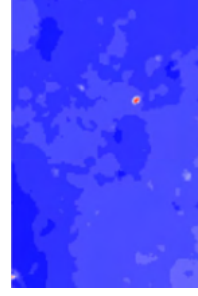

CGTTC+GAACG

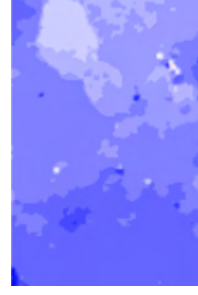

CTAAA+TTTAG

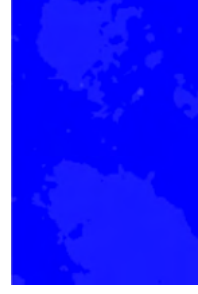

CTAAC+GTTAG











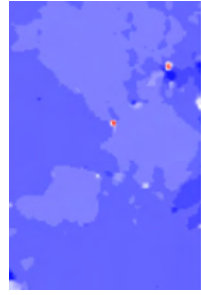

GGTAA+TTACC

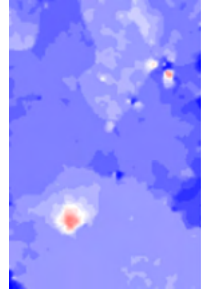

GGTAC+GTACC

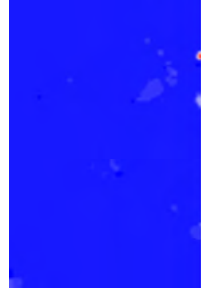

GGTCa+TGACC

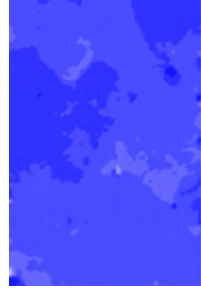

GGTGA+TCACC

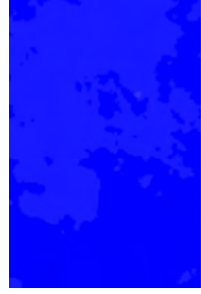

GGTTA+TAACC

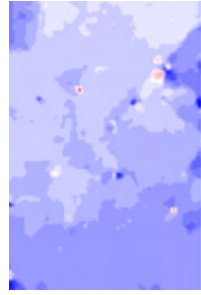

GTAAA+TTTAC

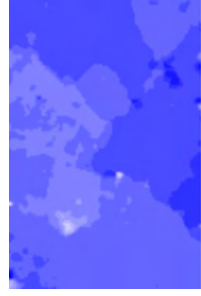

GTAAC+GTTAC

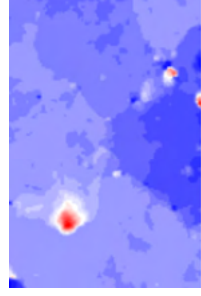

GTACA+TGTAC

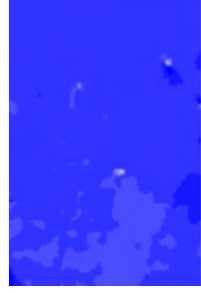

GTAGA+TCTAC

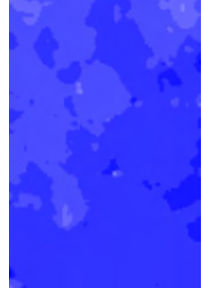

GTATA+TATAC

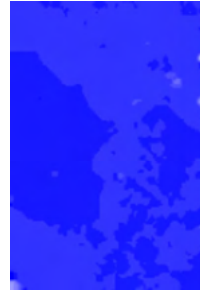

GTCAA+TTGAC

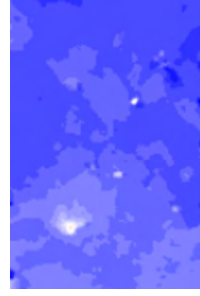

GTCAC+GTGAC

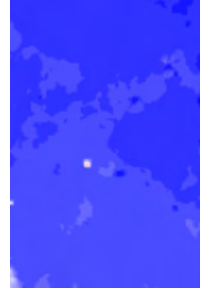

GTCCA+TGGAC

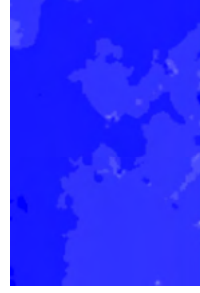

GTCGA+TCGAC

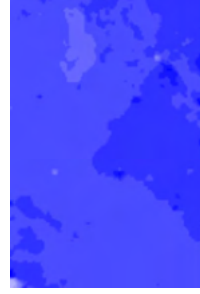

GTCTA+TAGAC

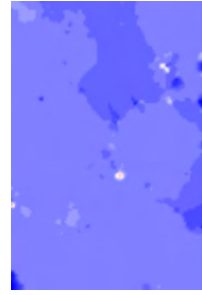

GTGAA+TTCAC

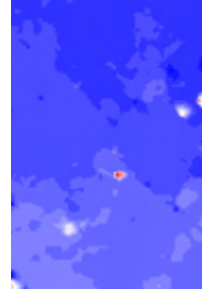

GTGCA+TGCAC

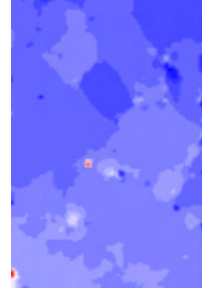

GTGGA+TCCAC

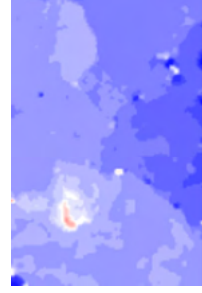

GTGTA+TACAC

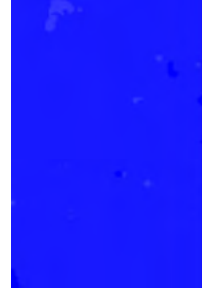

GTTAA+TTAAC

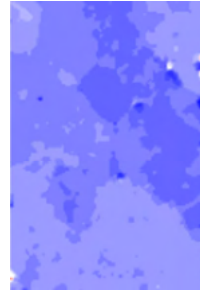

GTTCA+TGAAC

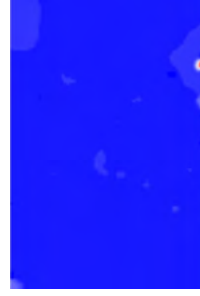

GTTGA+TCAAC

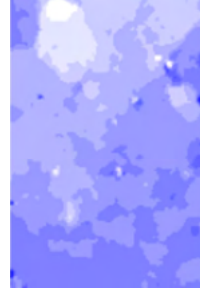

GTTTA+TAAAC

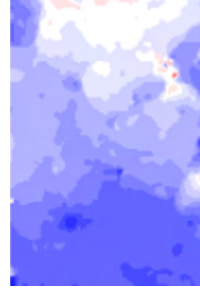

TAAAA+TTTTA

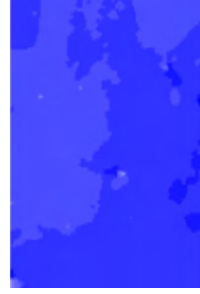

TAACA+TGTTA

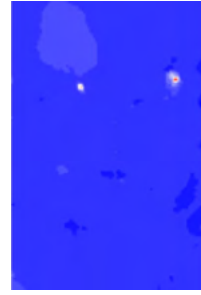

TAAGA+TCTTA

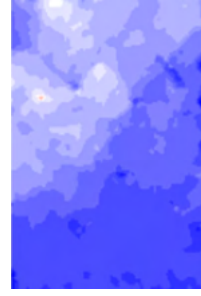

TAATA+TATTA

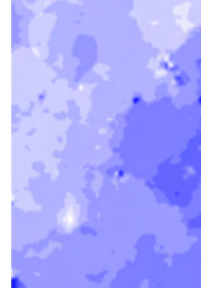

TACAA+TTGTA

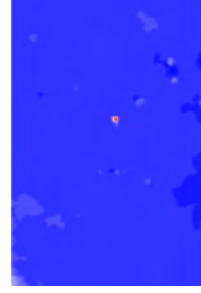

TACCA+TGGTA

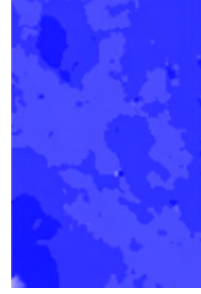

TACGA+TCGTA

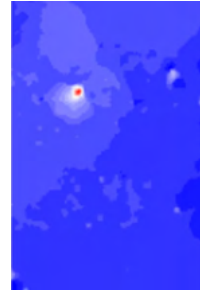

TACTA+TAGTA

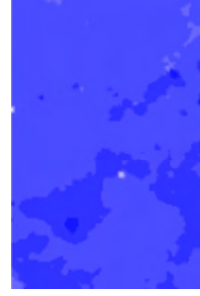

TAGAA+TTCTA

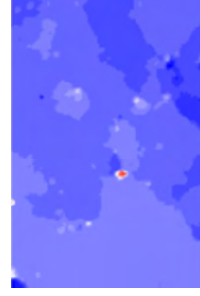

TAGCA+TGCTA

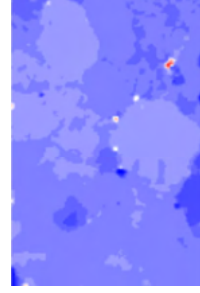

TAGGA+TCCTA

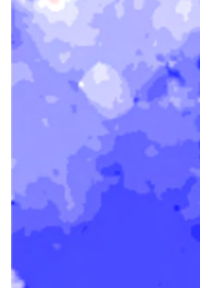

TATAA+TTATA



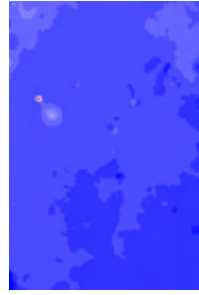

TATCA+TGATA

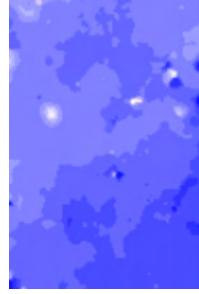

TATGA+TCATA

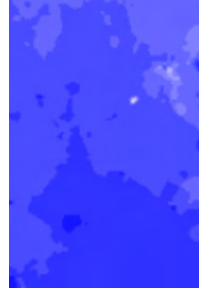

TCAAA+TTTTGA

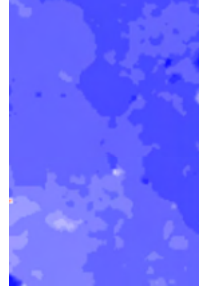

TCACA+TGTGA

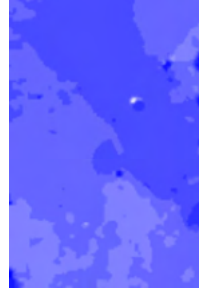

TCAGA+TCTGA

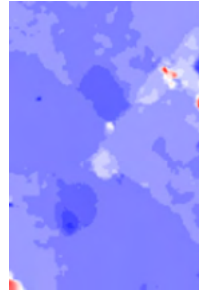

TCCAA+TTGGA

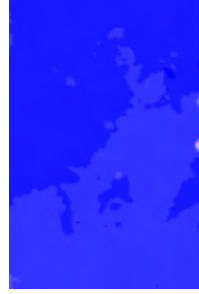

TCCCA+TGGGA

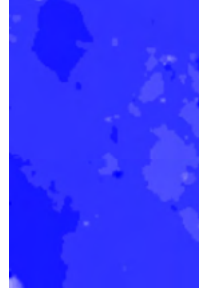

TCCGA+TCGGA

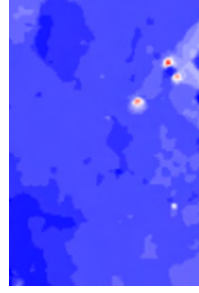

TCGAA+TTCGA

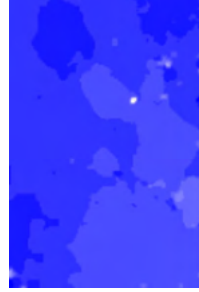

TCGCA+TGC GA

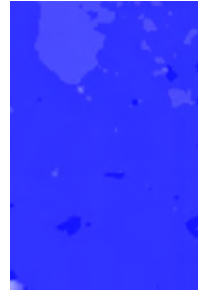

TCTAA+TTAGA

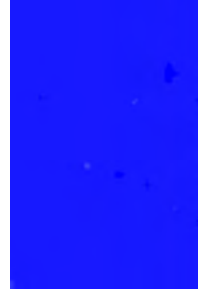

TCTCA+TGAGA

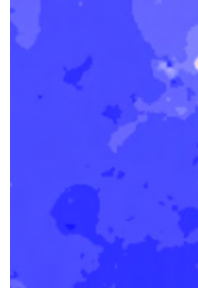

TGAAA+TTTTCA

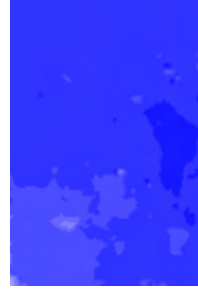

TGACA+TG TCA

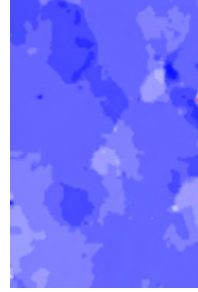

TGCAA+TTGCA

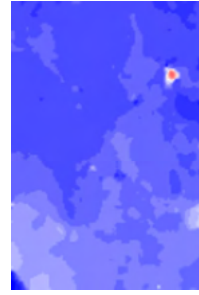

TGCCA+TGGCA

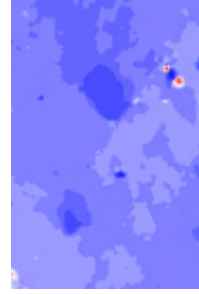

TGGAA+TTCCA

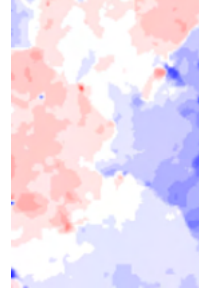

TGTAA+TTACA

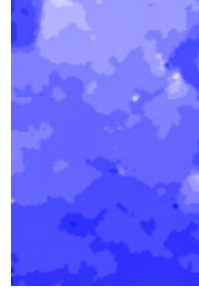

TTAAA+TTTTAA

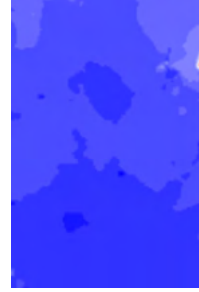

TTCAA+TTGAA

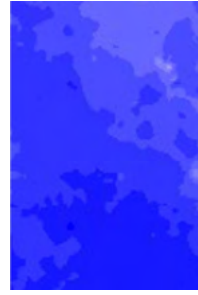

AAAAA+TTTTT

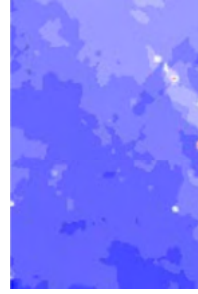

AAAAC+GTTTT
