# Supplementary material for: Unsupervised AI reveals insect species-specific genome signatures
Source: PeerJ journal article supplement (doi:10.7717/peerj.17025), 2024-03-06
Supplement: Data_S3.pdf [file Data_S3.pdf]

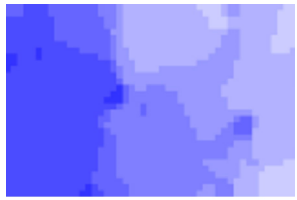

AATAA+TTATT

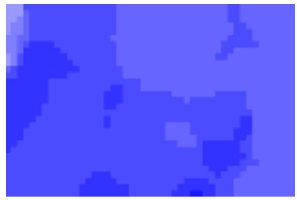

AATAC+GTATT

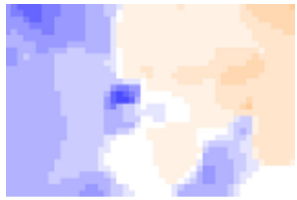

AATAG+CTATT

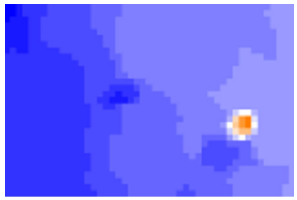

AATAT+ATATT

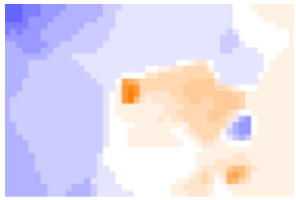

AATCA+TGATT

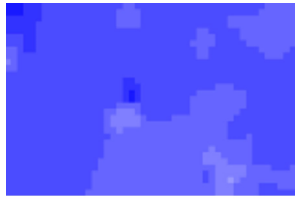

AATCC+GGATT

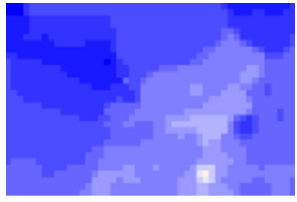

AATCG+CGATT

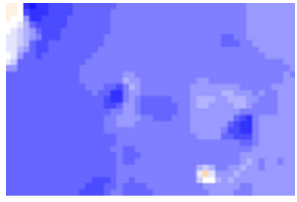

AATCT+AGATT

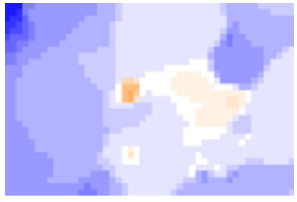

AATGA+TCATT

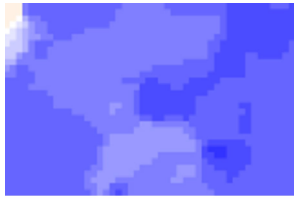

AATGC+GCATT

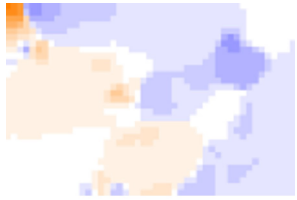

AATGG+CCATT

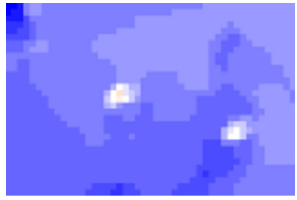

AATGT+ACATT

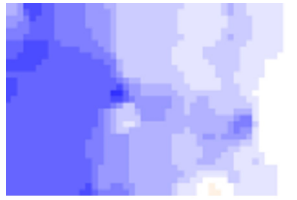

AATTA+TAATT

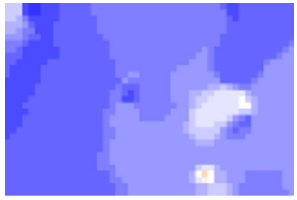

AATTC+GAATT

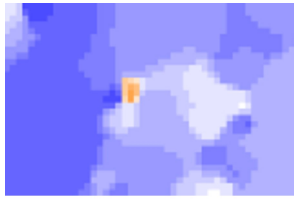

AATTG+CAATT

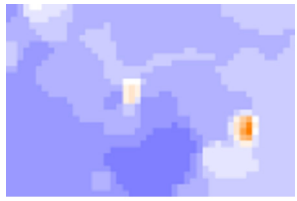

ACAAA+TTTGT

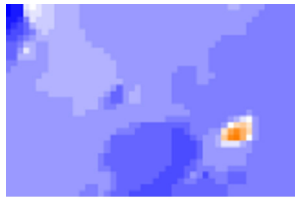

ACAAC+GTTGT

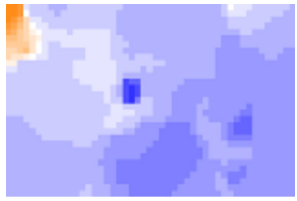

ACAAG+CTTGT

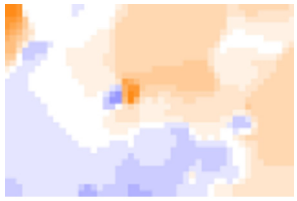

ACAAT+ATTGT

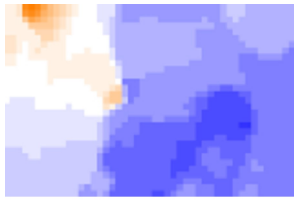

ACACA+TGTGT

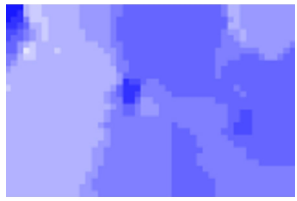

ACACC+GGTGT

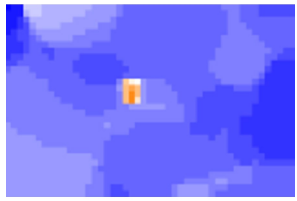

ACACG+CGTGT

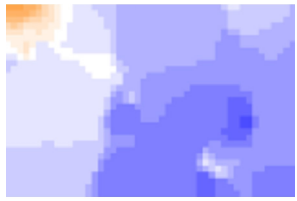

ACACT+AGTGT

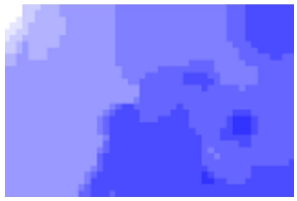

ACAGA+TCTGT

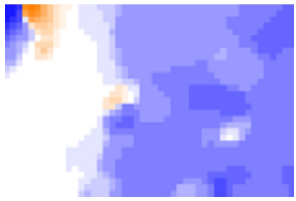

ACAGC+GCTGT

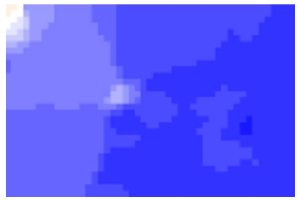

ACAGG+CCTGT

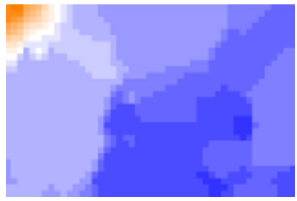

ACAGT+ACTGT

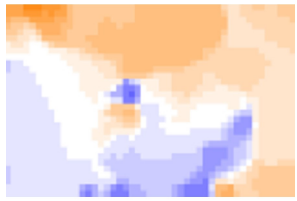

ACATA+TATGT

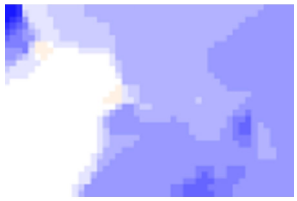

ACATC+GATGT

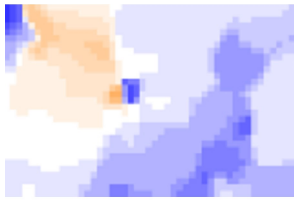

ACATG+CATGT

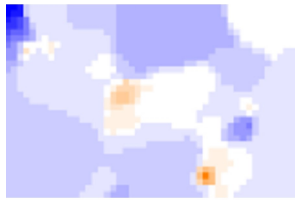

ACCAA+TTGGT

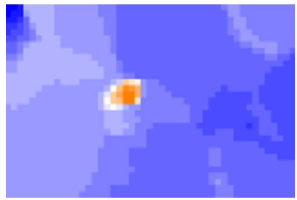

ACCAC+GTGGT

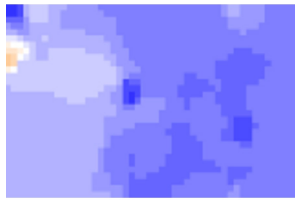

ACCAG+CTGGT

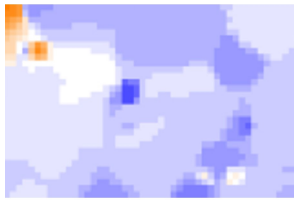

ACCAT+ATGGT

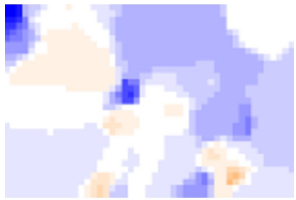

ACCCA+TGGGT

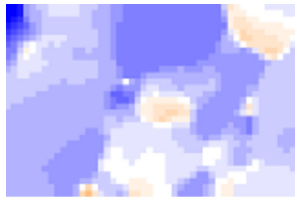

ACCCC+GGGGT

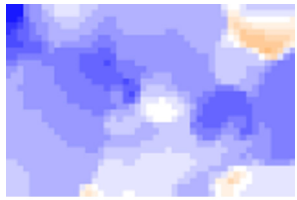

ACCCG+CGGGT

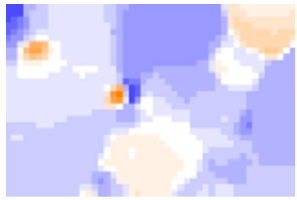

ACCCT+AGGGT

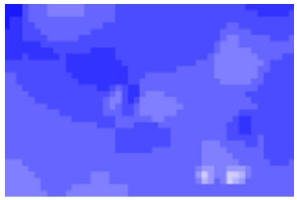

ACCGA+TCGGT

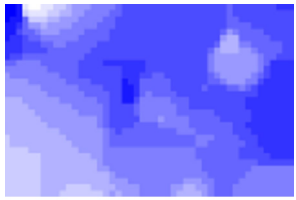

ACCGC+GCGGT

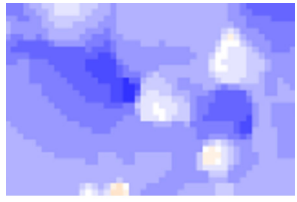

ACCGG+CCGGT

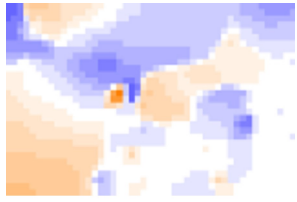

ACCGT+ACGGT

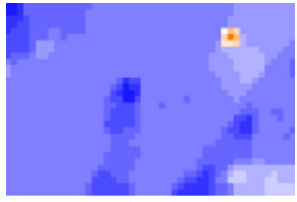

ACCTA+TAGGT

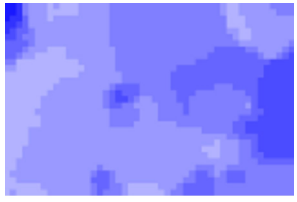

ACCTC+GAGGT

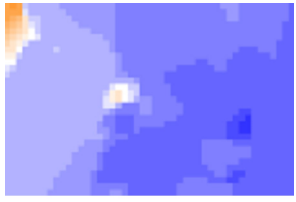

ACCTG+CAGGT

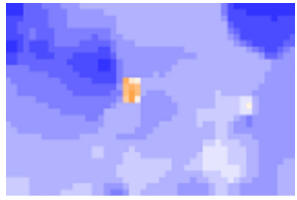

ACGAA+TTCGT

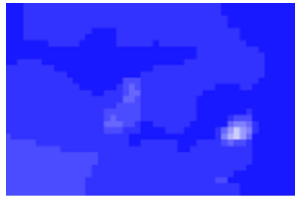

ACGAC+GTCGT

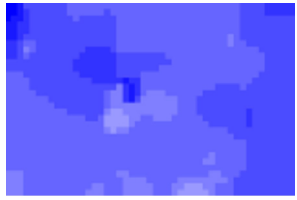

ACGAG+CTCGT

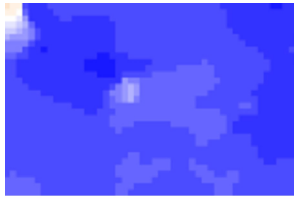

ACGAT+ATCGT

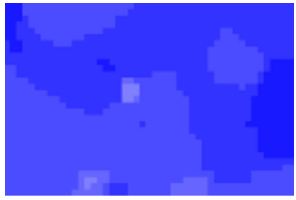

ACGCA+TGCCT

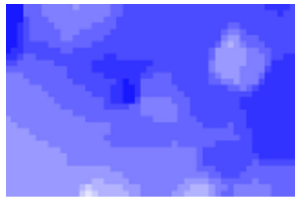

ACGCC+GGCGT

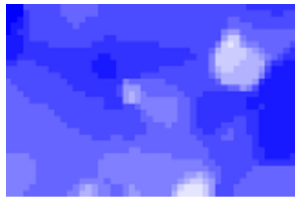

ACGCG+CGCGT

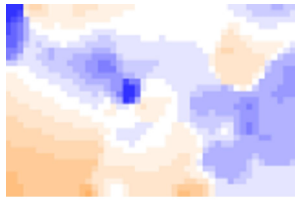

ACGCT+AGCGT

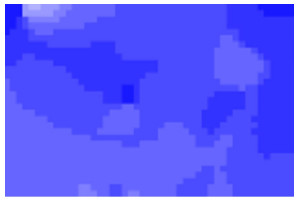

ACGGA+TCCGT

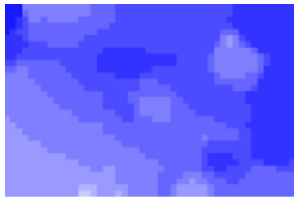

ACGGC+GCCGT

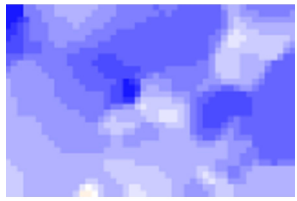

ACGGG+CCCGT

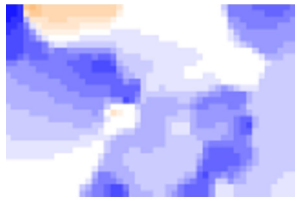

ACGTA+TACGT

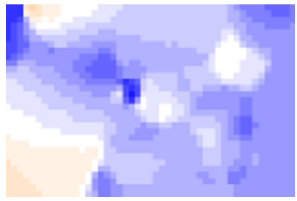

ACGTC+GACGT

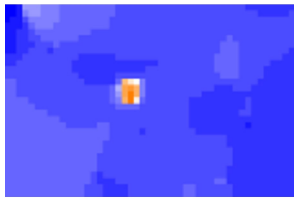

ACGTG+CACGT

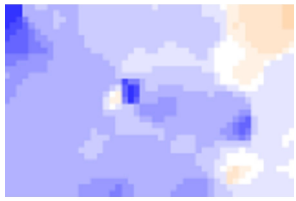

ACTAA+TTAGT

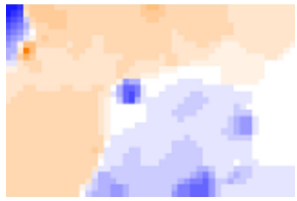

ACTAC+GTAGT

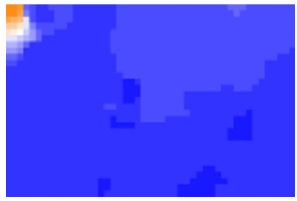

ACTAG+CTAGT

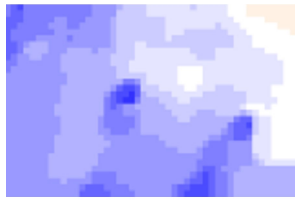

ACTAT+ATAGT

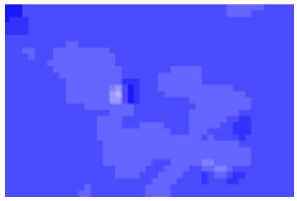

ACTCA+TGAGT

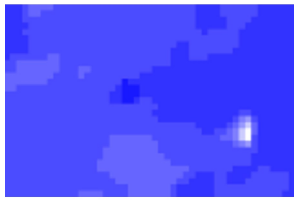

ACTCC+GGAGT

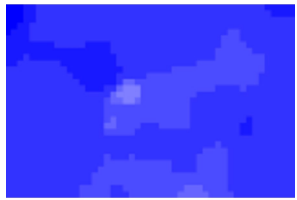

ACTCG+CGAGT

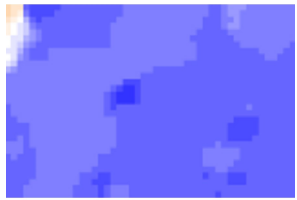

ACTCT+AGAGT

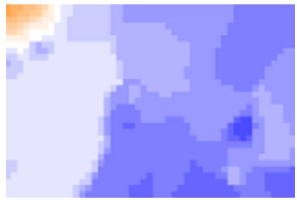

ACTGA+TCAGT

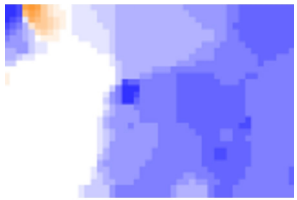

ACTGC+GCAGT

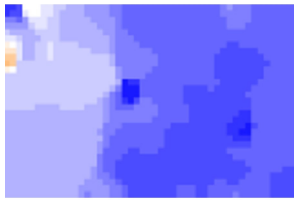

ACTGG+CCAGT

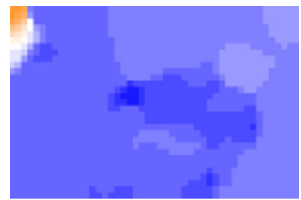

ACTTA+TAAGT

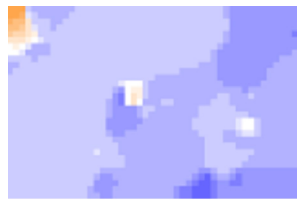

ACTTC+GAAGT

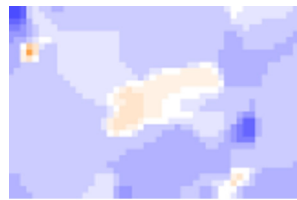

ACTTG+CAAGT

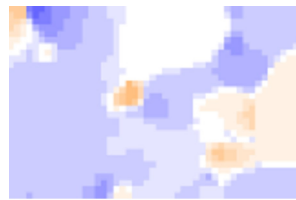

AGAAA+TTTCT

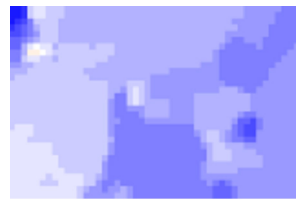

AGAAC+GTTCT

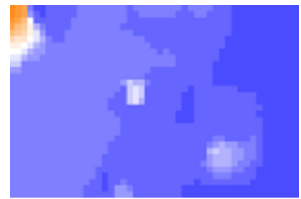

AGAAG+CTTCT

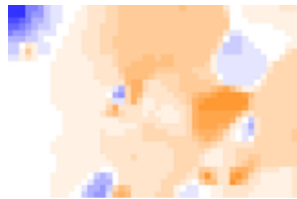

AGAAT+ATTCT

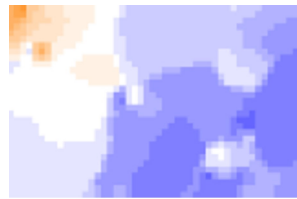

AGACA+TGTCT

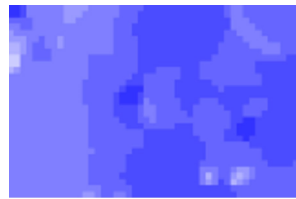

AGACC+GGTCT

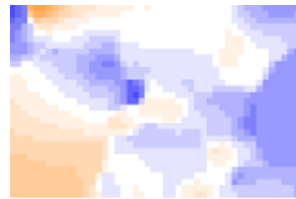

AGACG+CGTCT

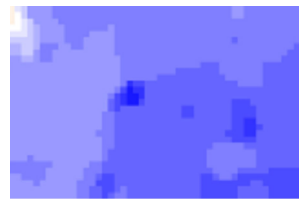

AGACT+AGTCT

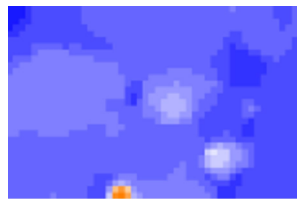

AGAGA+TCTCT

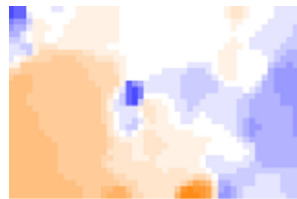

AGAGC+GCTCT

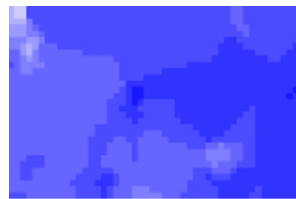

AGAGG+CCTCT

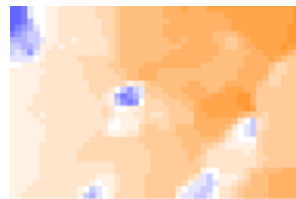

AGATA+TATCT

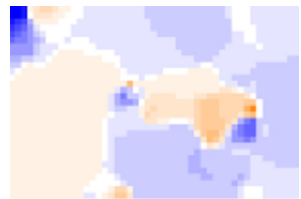

AGATC+GATCT

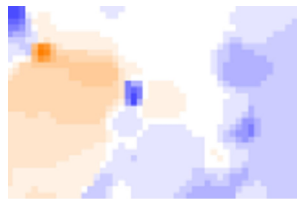

AGATG+CATCT

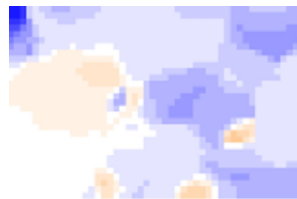

AGCAA+TTGCT

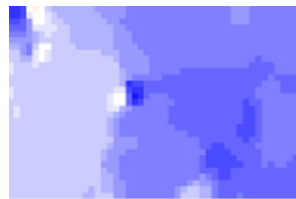

AGCAC+GTGCT

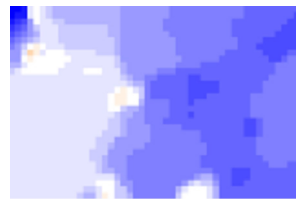

AGCAG+CTGCT

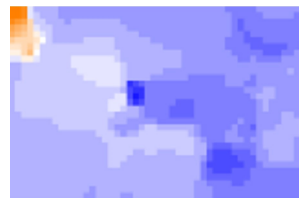

AGCAT+ATGCT

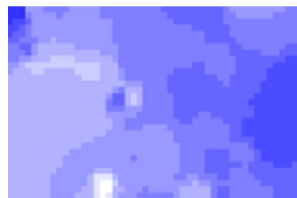

AGCCA+TGGCT

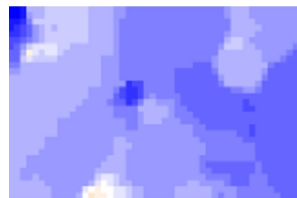

AGCCC+GGGCT

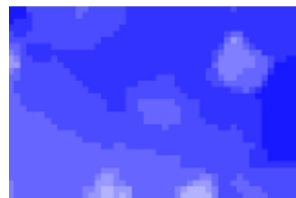

AGCCG+CGGCT

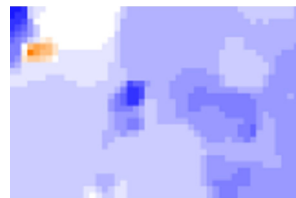

AGCCT+AGGCT

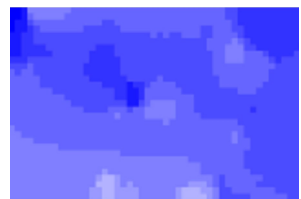

AGCGA+TCGCT

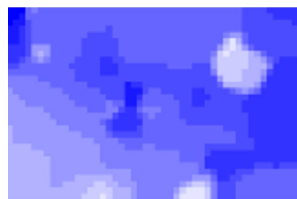

AGCGC+GCGCT

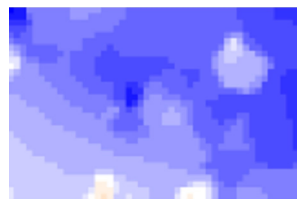

AGCGG+CCGCT

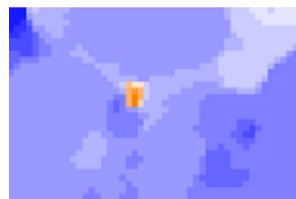

AGCTA+TAGCT

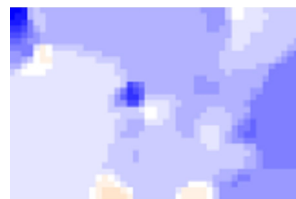

AGCTC+GAGCT

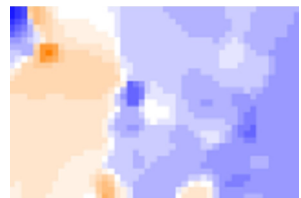

AGCTG+CAGCT

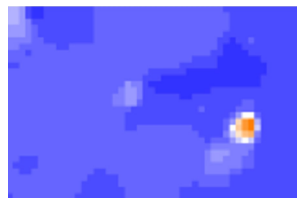

AGGAA+TTCCT

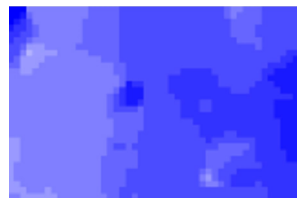

AGGAC+GTCCT

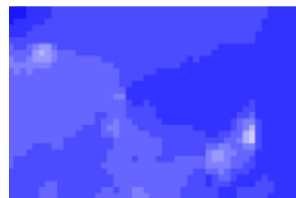

AGGAG+CTCCT

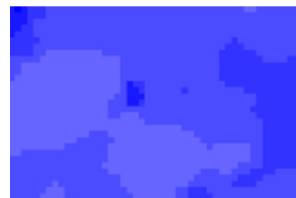

AGGAT+ATCCT

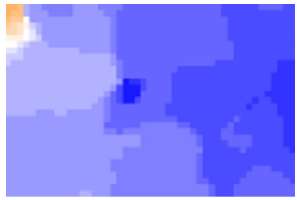

AGGCA+TGCCT

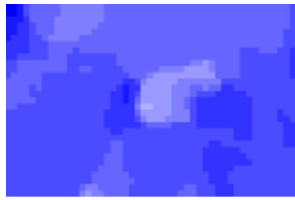

AGGCC+GGCCT

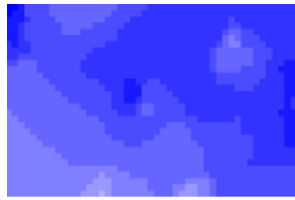

AGGCG+CGCCT

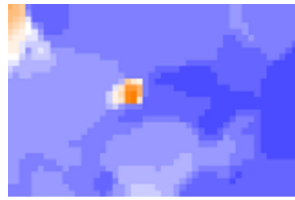

AGGGA+TCCCT

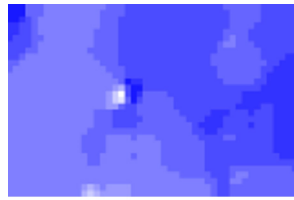

AGGGC+GCCCT

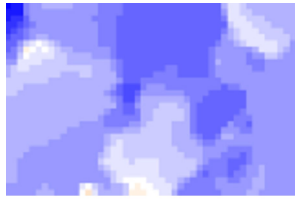

AGGGG+CCCCT

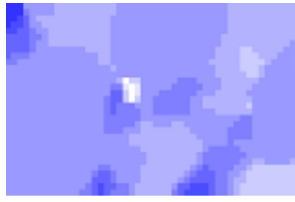

AGGTA+TACCT

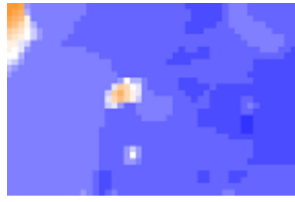

AGGTC+GACCT

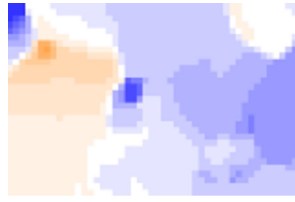

AGGTG+CACCT

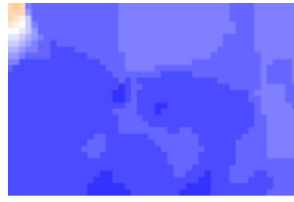

AGTAA+TTACT

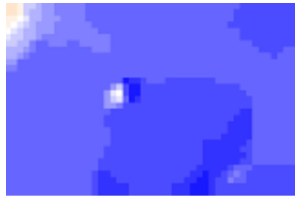

AGTAC+GTACT

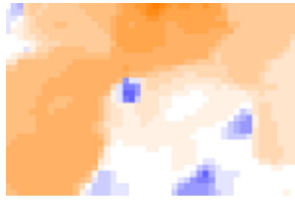

AGTAG+CTACT

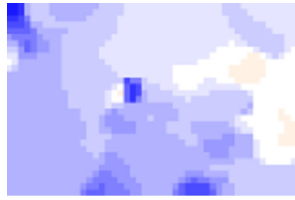

AGTAT+ATACT

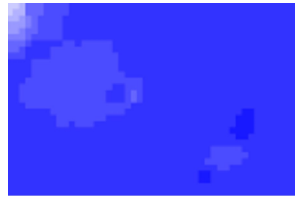

AGTCA+TGACT

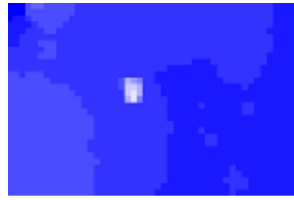

AGTCC+GGACT

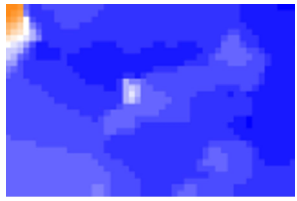

AGTCG+CGACT

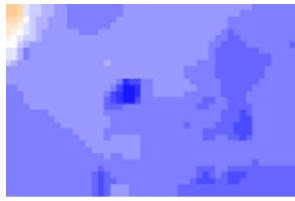

AGTGA+TCACT

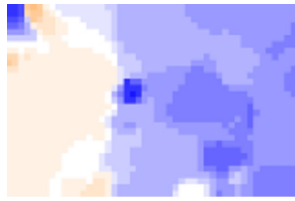

AGTGC+GCACT

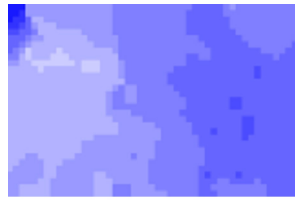

AGTGG+CCACT

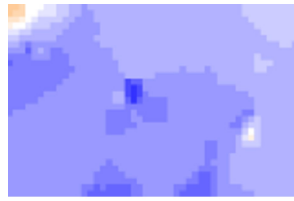

AGTTA+TAACT

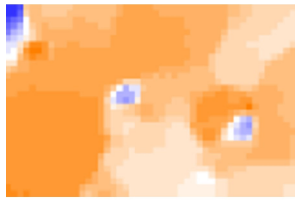

AGTTC+GAACT

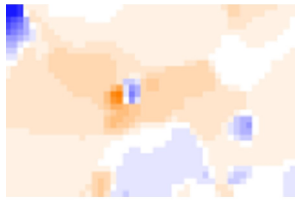

AGTTG+CAACT

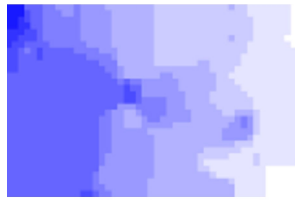

ATAAA+TTTAT

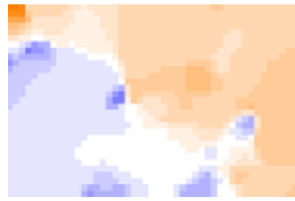

ATAAC+GTTAT

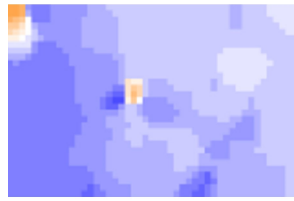

ATAAG+CTTAT

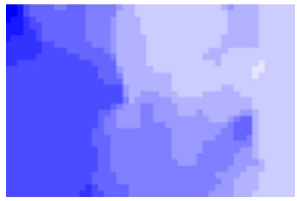

ATAAT+ATTAT

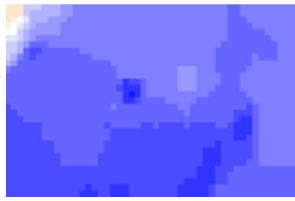

ATACA+TGTAT

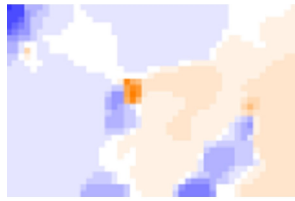

ATACC+GGTAT

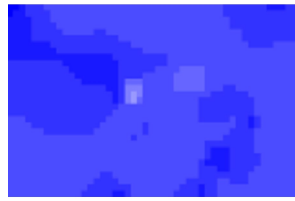

ATACG+CGTAT

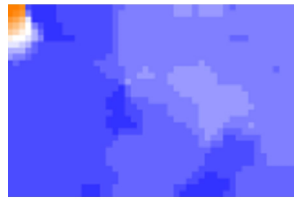

ATAGA+TCTAT

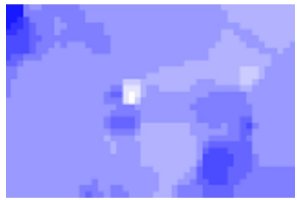

ATAGC+GCTAT

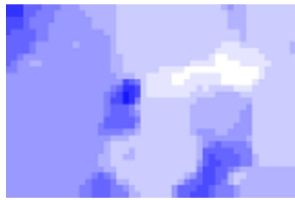

ATAGG+CCTAT

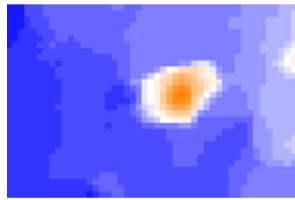

ATATA+TATAT

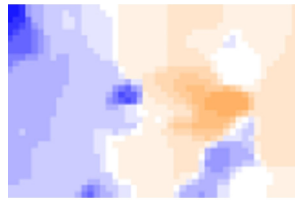

ATATC+GATAT

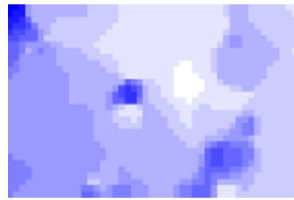

ATATG+CATAT

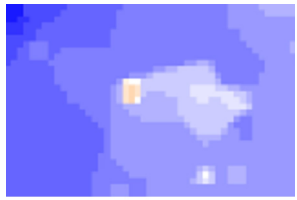

ATCAA+TTGAT

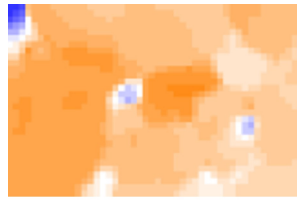

ATCAC+GTGAT

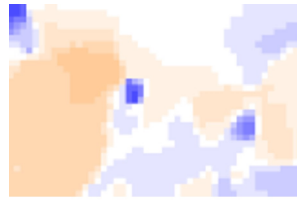

ATCAG+CTGAT

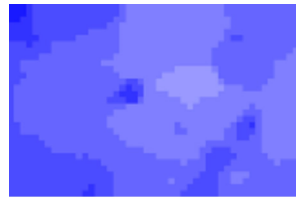

ATCAT+ATGAT

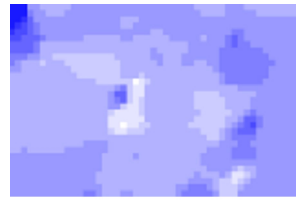

ATCCA+TGGAT

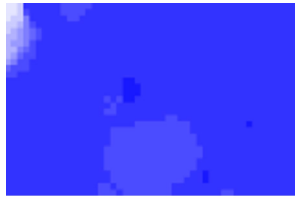

ATCCC+GGGAT

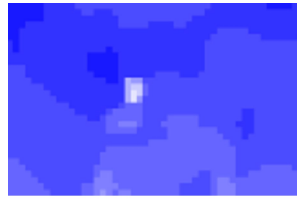

ATCCG+CGGAT

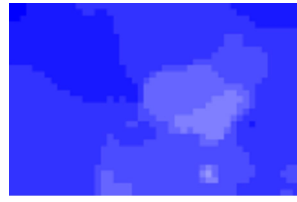

ATCGA+TCGAT

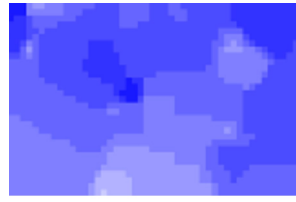

ATCGC+GCGAT

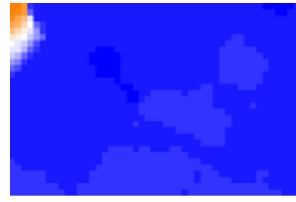

ATCGG+CCGAT

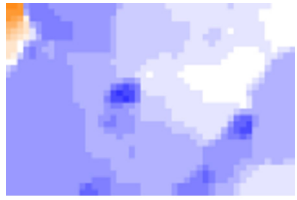

ATCTA+TAGAT

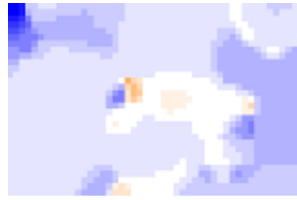

ATCTC+GAGAT

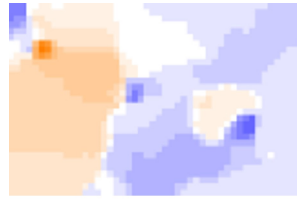

ATCTG+CAGAT

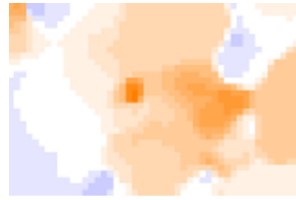

ATGAA+TTCAT

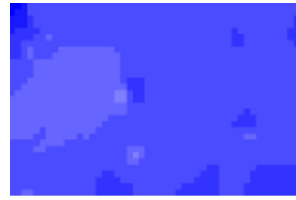

ATGAC+GTCAT

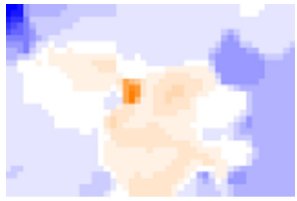

ATGAG+CTCAT

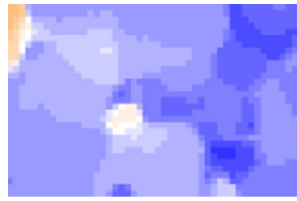

ATGCA+TGCAT

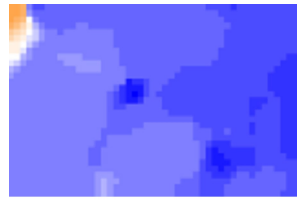

ATGCC+GGCAT

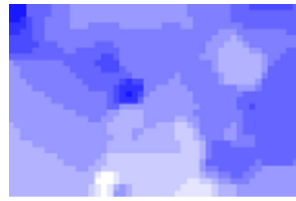

ATGCG+CGCAT

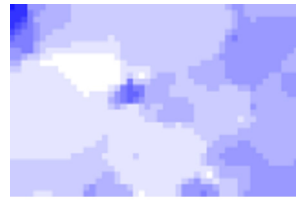

ATGGA+TCCAT

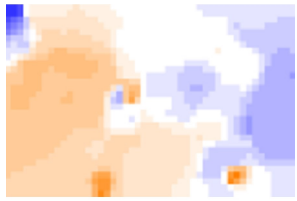

ATGGC+GCCAT

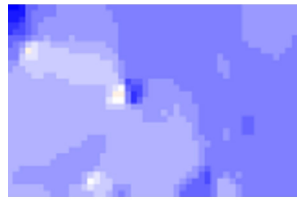

ATGGG+CCCAT

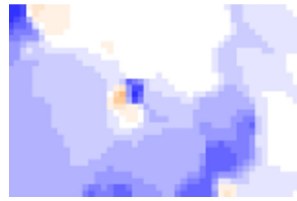

ATGTA+TACAT

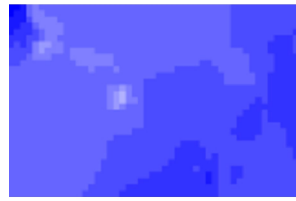

ATGTC+GACAT

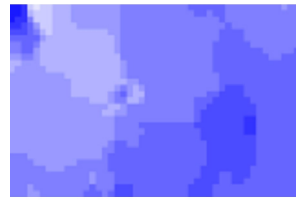

ATGTG+CACAT

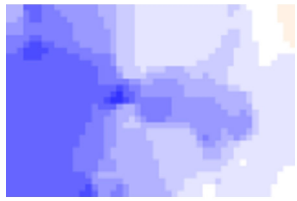

ATTAA+TTAAT

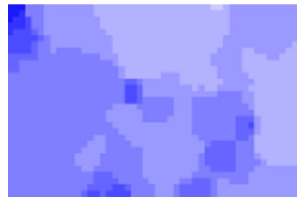

ATTAC+GTAAT

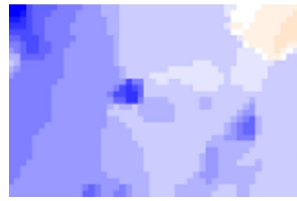

ATTAG+CTAAT

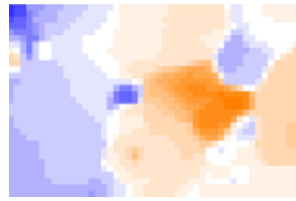

ATTCA+TGAAT

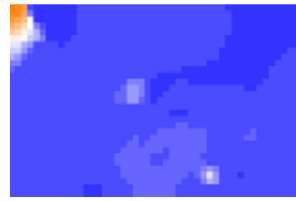

ATTCC+GGAAT

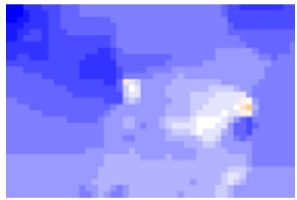

ATTCG+CGAAT

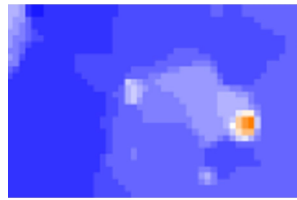

ATTGA+TCAAT

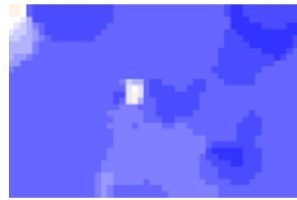

ATTGC+GCAAT

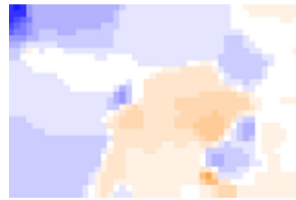

ATTGG+CCAAT

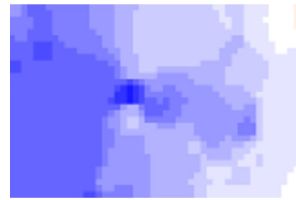

ATTTA+TAAAT

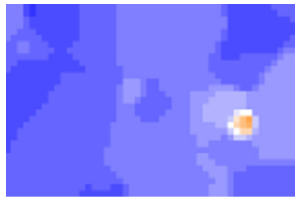

ATTC+GAAAT

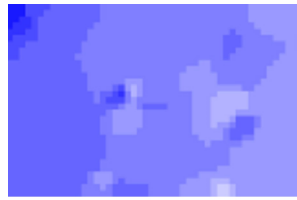

ATTG+CAAAT

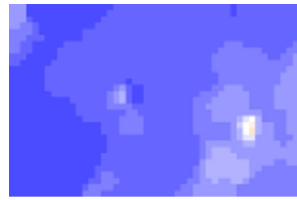

CAAAA+TTTTG

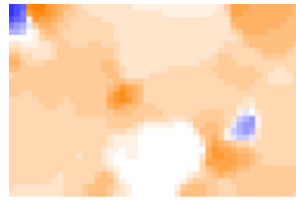

CAAAC+GTTTG

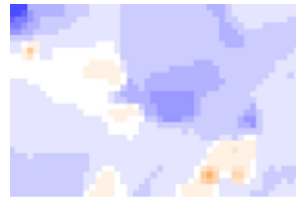

CAAAG+CTTTG

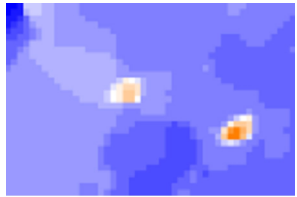

CAACA+TGTTG

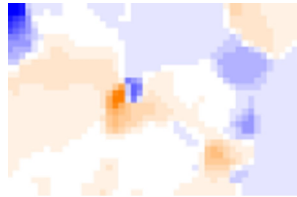

CAACC+GGTTG

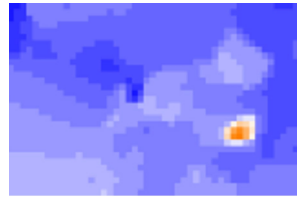

CAACG+CGTTG

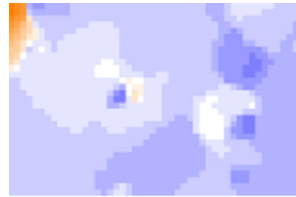

CAAGA+TCTTG

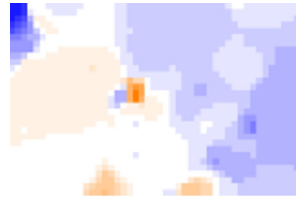

CAAGC+GCTTG

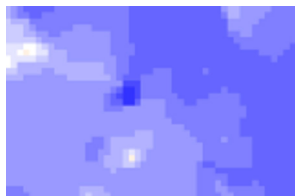

CAAGG+CCTTG

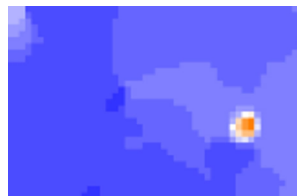

CAATA+TATTG

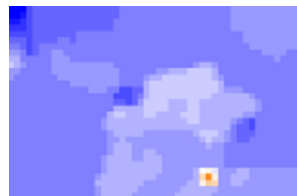

CAATC+GATTG

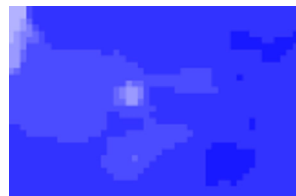

CAATG+CATTG

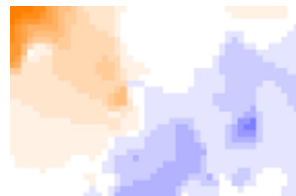

CACAA+TTGTG

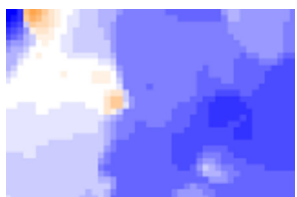

CACAC+GTGTG

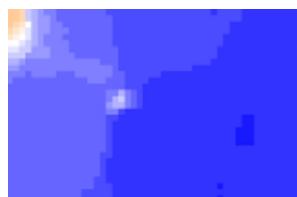

CACAG+CTGTG

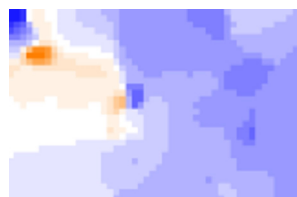

CACCA+TGGTG

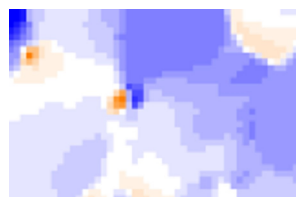

CACCC+GGGTG

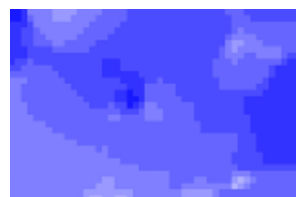

CACCG+CGGTG

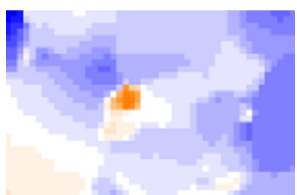

CACGA+TCGTG

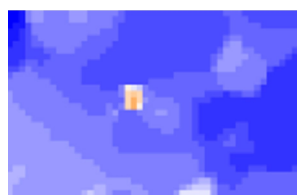

CACGC+GCGTG

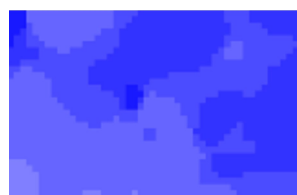

CACGG+CCGTG

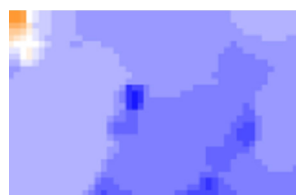

CACTA+TAGTG

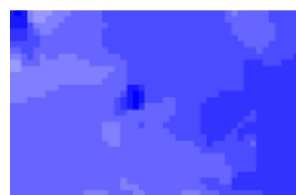

CACTC+GAGTG

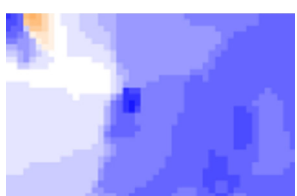

CACTG+CAGTG

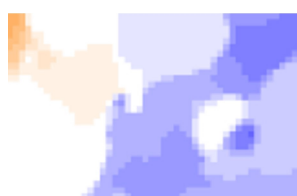

CAGAA+TTCTG

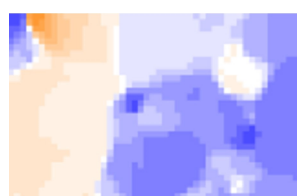

CAGAC+GTCTG

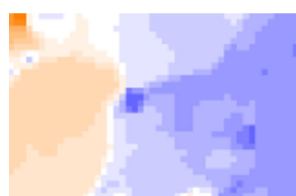

CAGAG+CTCTG

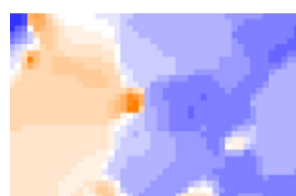

CAGCA+TGCTG

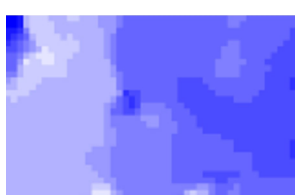

CAGCC+GGCTG

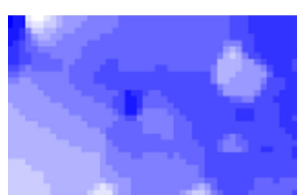

CAGCG+CGCTG

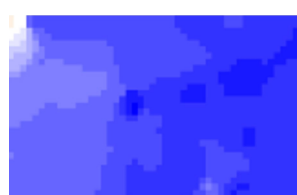

CAGGA+TCCTG

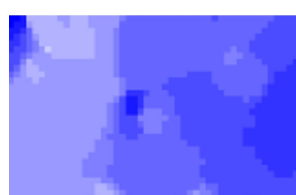

CAGGC+GCCTG

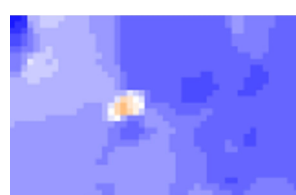

CAGGG+CCCTG

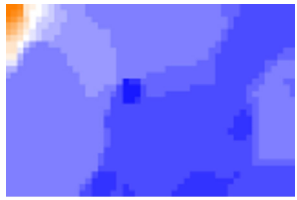

CAGTA+TACTG

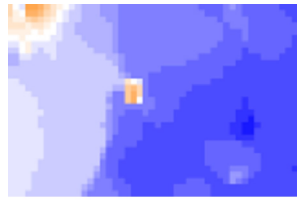

CAGTC+GACTG

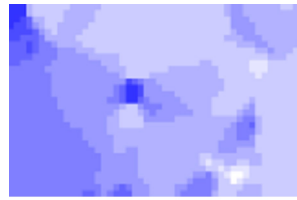

CATAA+TTATG

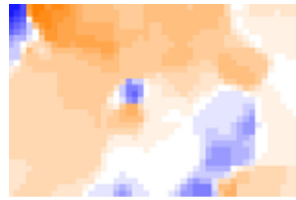

CATAC+GTATG

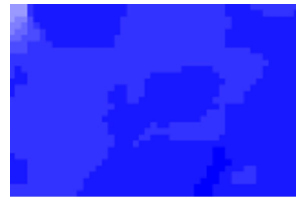

CATAG+CTATG

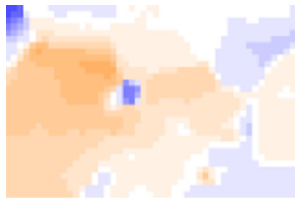

CATCA+TGATG

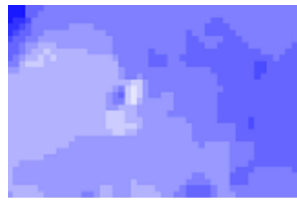

CATCC+GGATG

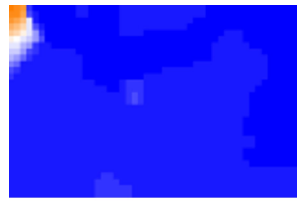

CATCG+CGATG

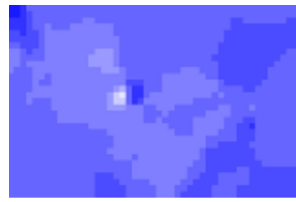

CATGA+TCATG

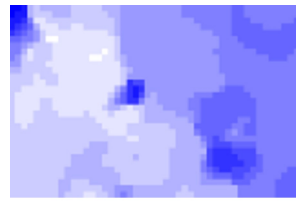

CATGC+GCATG

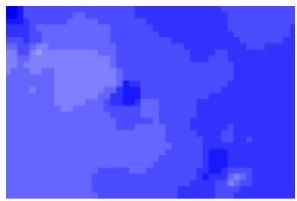

CATGG+CCATG

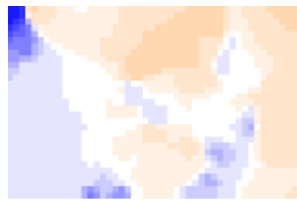

CATTG+TAATG

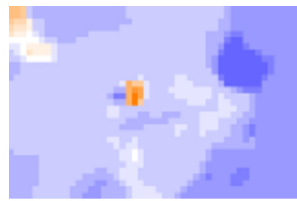

CATTG+GAATG

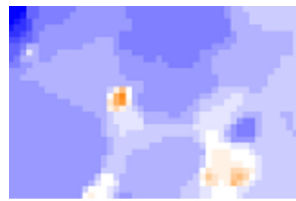

CAAAA+TTTGG

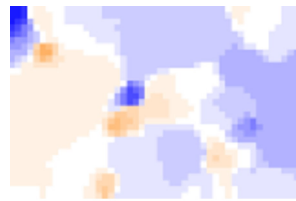

CAAC+GTTGG

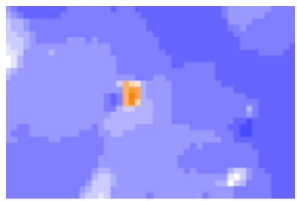

CAAG+CTTGG

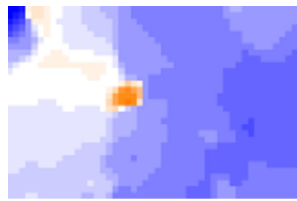

CCACA+TGTGG

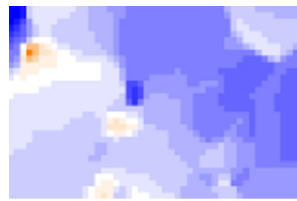

CCACC+GGTGG

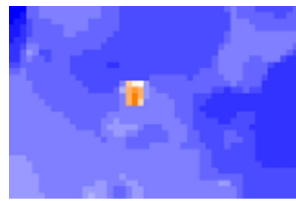

CCACG+CGTGG

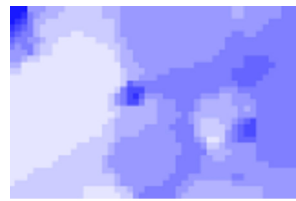

CCAGA+TCTGG

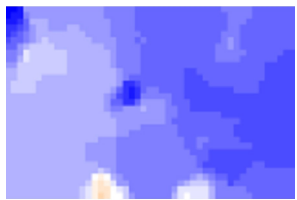

CCAGC+GCTGG

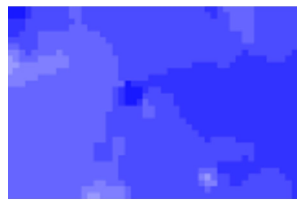

CCAGG+CCTGG

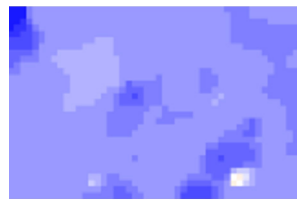

CCATA+TATGG

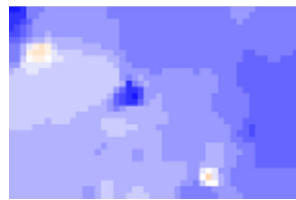

CCATC+GATGG

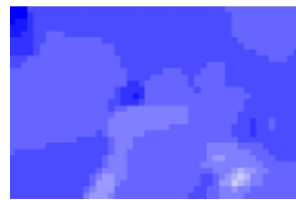

CCCAA+TTGGG

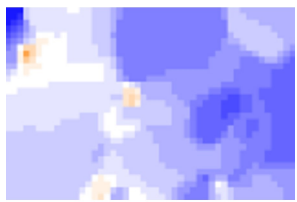

CCCAC+GTGGG

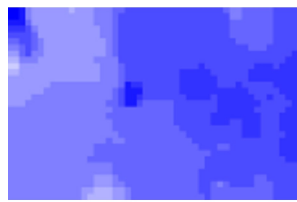

CCCAG+CTGGG

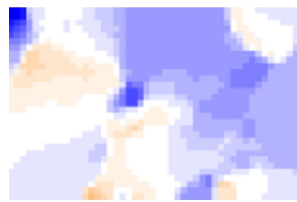

CCCCA+TGGGG

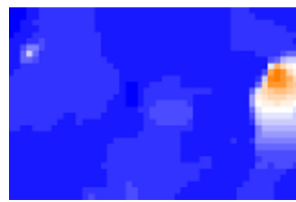

CCCCC+GGGGG

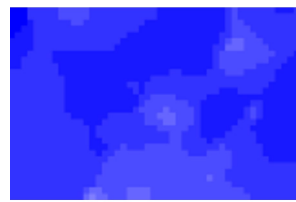

CCCG+CGGGG

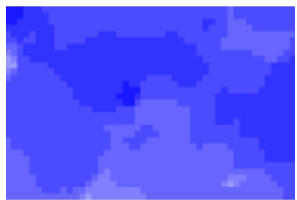

CCCGA+TCGGG

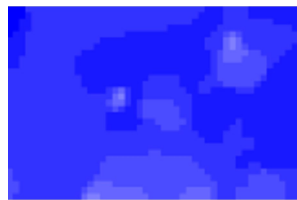

CCCGC+GCGGG

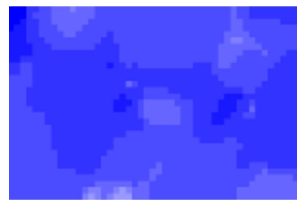

CCCGG+CCGGG

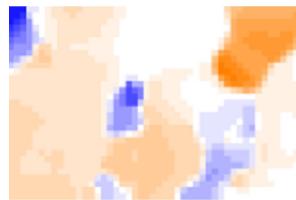

CCCTA+TAGGG

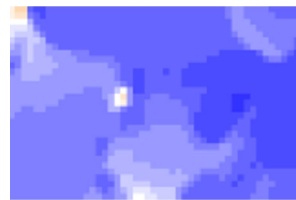

CCCTC+GAGGG

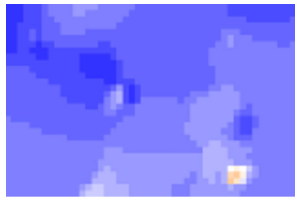

CCGAA+TTCGG

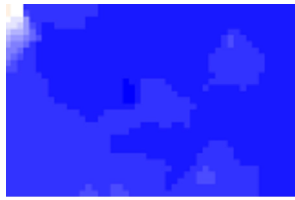

CCGAC+GTCGG

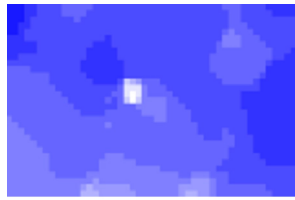

CCGAG+CTCGG

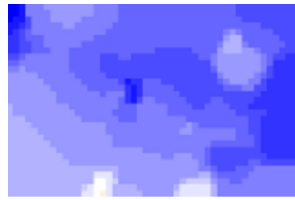

CCGCA+TGCGG

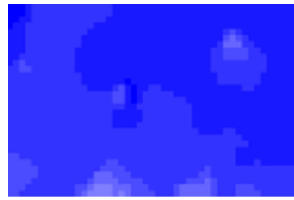

CCGCC+GGCGG

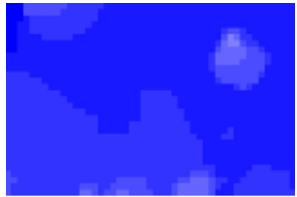

CCGCG+CGCGG

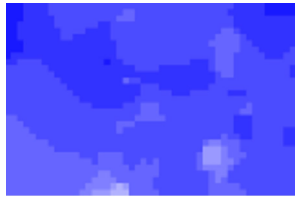

CCGGA+TCCGG

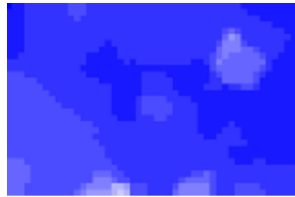

CCGGC+GCCGG

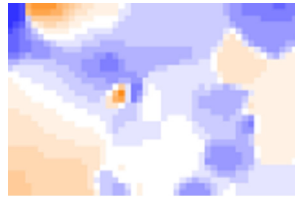

CCGTA+TACGG

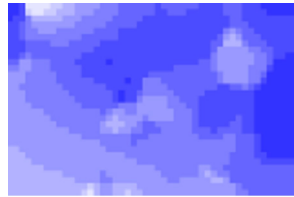

CCGTC+GACGG

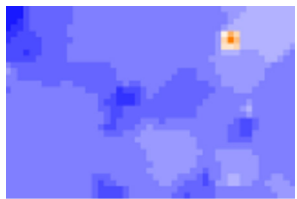

CCTAA+TTAGG

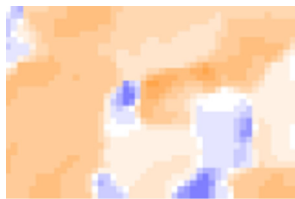

CCTAC+GTAGG

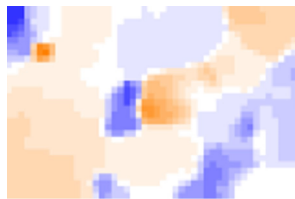

CCTAG+CTAGG

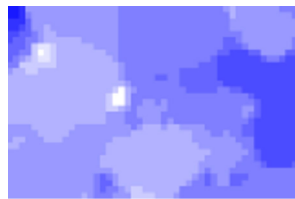

CCTCA+TGAGG

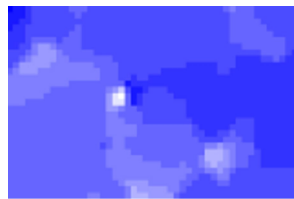

CCTCC+GGAGG

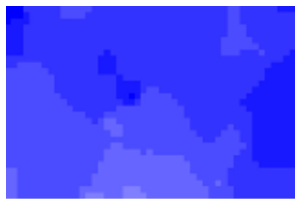

CCTCG+CGAGG

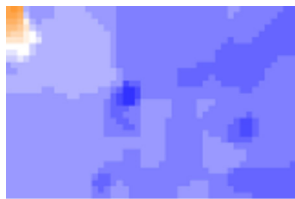

CCTGA+TCAGG

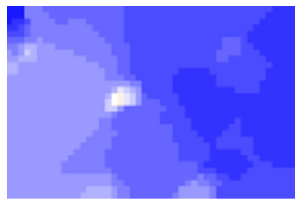

CCTGC+GCAGG

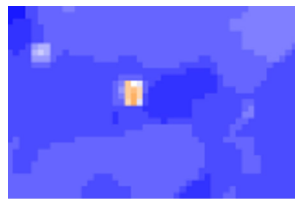

CCTTA+TAAGG

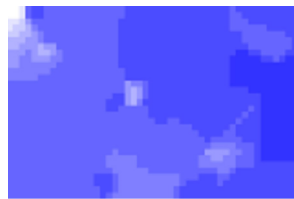

CCTTC+GAAGG

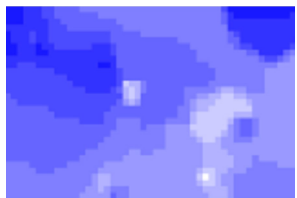

CGAAA+TTTCG

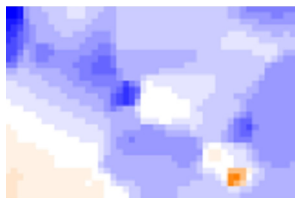

CGAAC+GTTCG

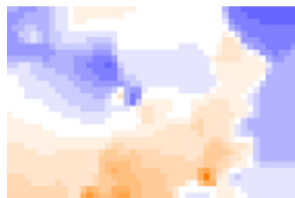

CGAAG+CTTCG

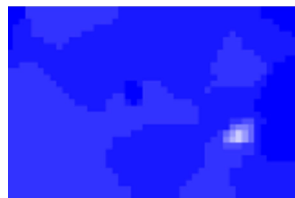

CGACA+TGTCG

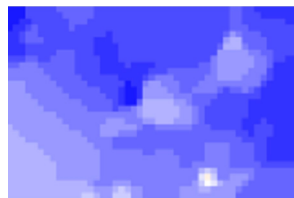

CGACC+GGTCG

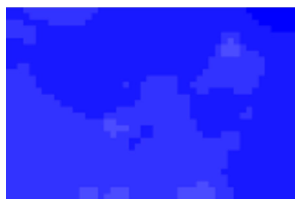

CGACG+CGTCG

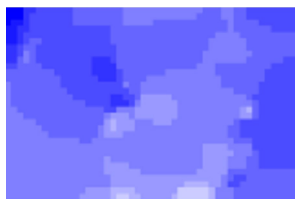

CGAGA+TCTCG

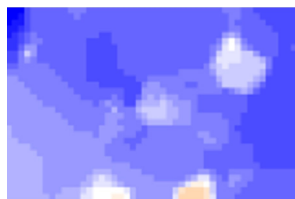

CGAGC+GCTCG

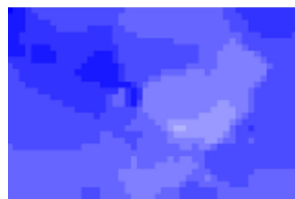

CGATA+TATCG

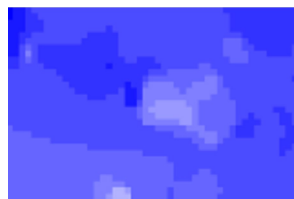

CGATC+GATCG

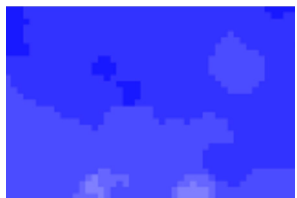

CGCAA+TTGCG

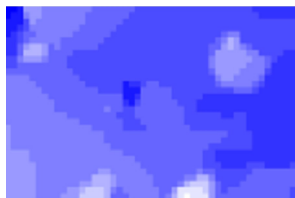

CGCAC+GTGCG

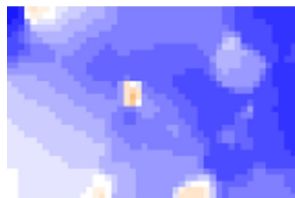

CGCAG+CTGCG

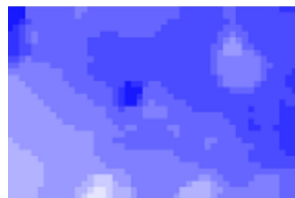

CGCCA+TGGCG

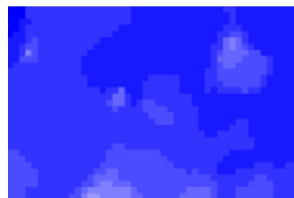

CGCCC+GGGCG



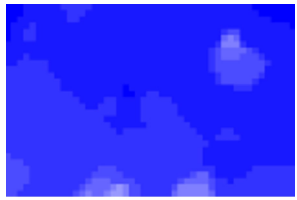

CGCCG+CGGCG

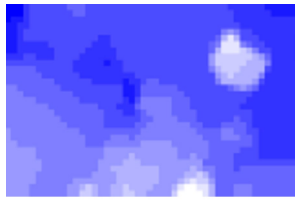

CGCGA+TCGCG

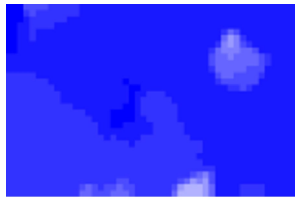

CGCGC+GCGCG

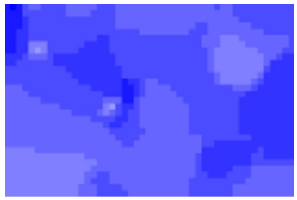

CGCTA+TAGCG

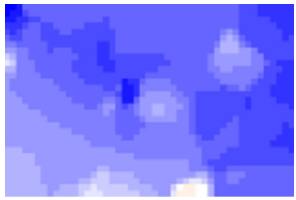

CGCTC+GAGCG

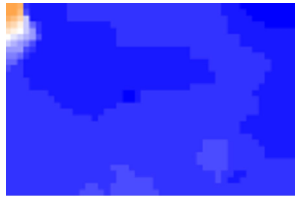

CGGAA+TTCCG

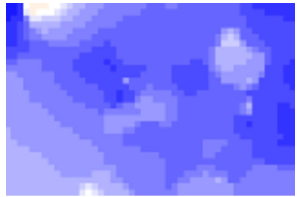

CGGAC+GTCCG

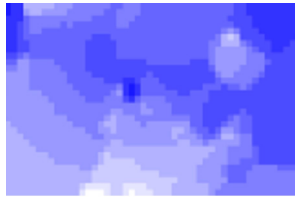

CGGAG+CTCCG

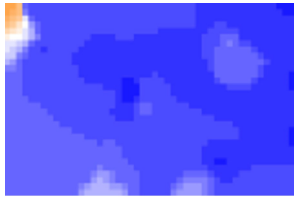

CGGCA+TGCCG

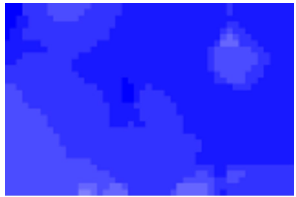

CGGCC+GGCCG

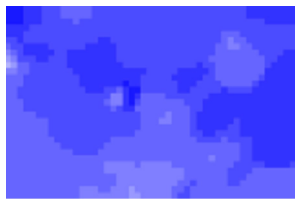

CGGGA+TCCCG

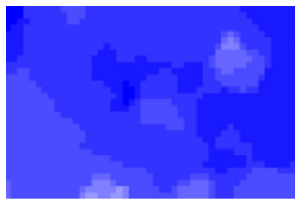

CGGGC+GCCCC

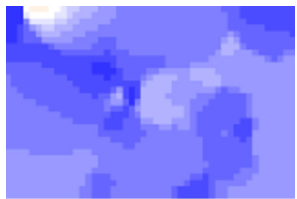

CGGTA+TACCG

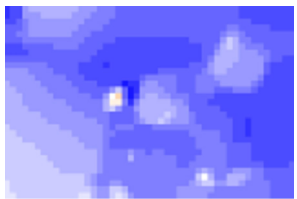

CGGTC+GACCG

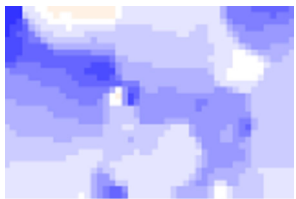

CGTAA+TTACG

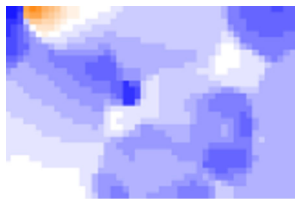

CGTAC+GTACG

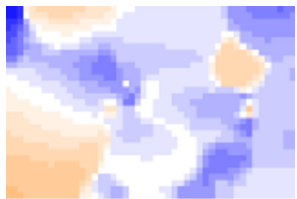

CGTAG+CTACG

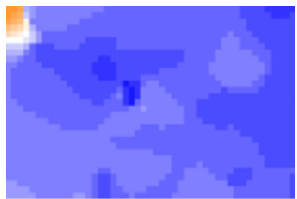

CGTCA+TGACG

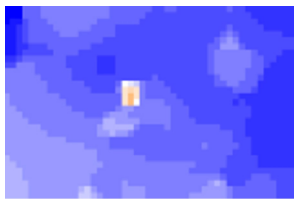

CGTCC+GGACG

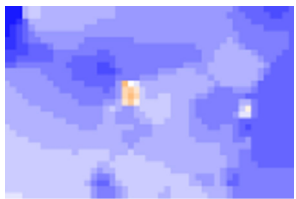

CGTGA+TCACG

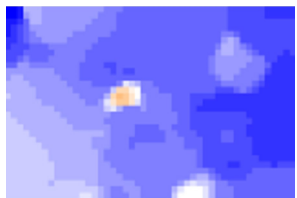

CGTGC+GCACG

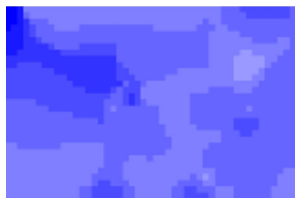

CGTTA+TAACG

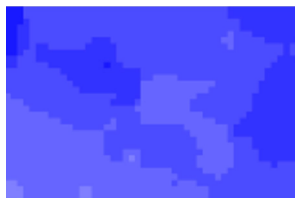

CGTTC+GAACG

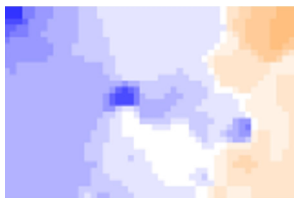

CTAAA+TTTAG

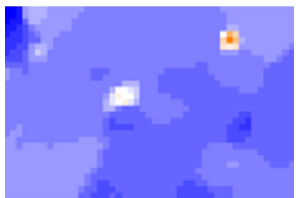

CTAAC+GTTAG

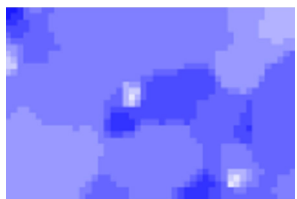

CTAAG+CTTAG

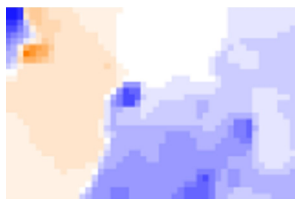

CTACA+TGTAG

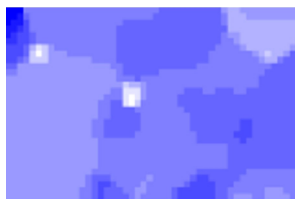

CTACC+GGTAG

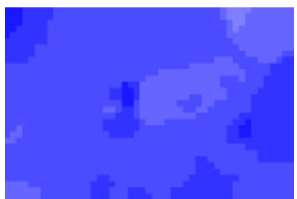

CTAGA+TCTAG

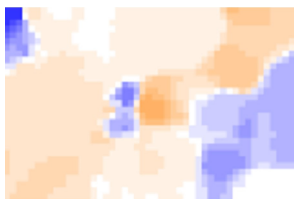

CTAGC+GCTAG

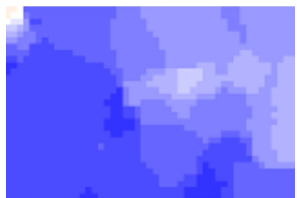

CTATA+TATAG

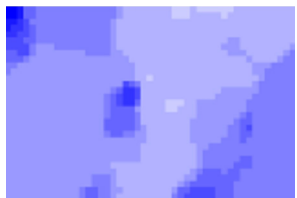

CTATC+GATAG

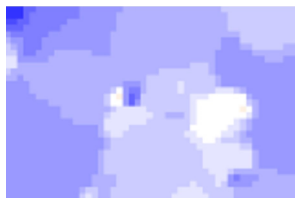

CTCAA+TTGAG

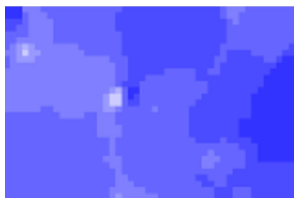

CTCAC+GTGAG

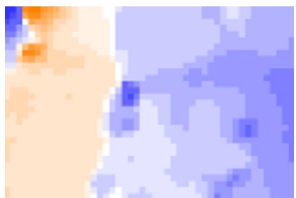

CTCAG+CTGAG

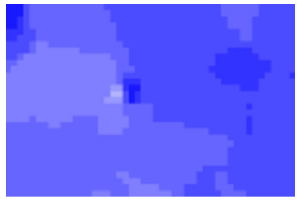

CTCCA+TGGAG

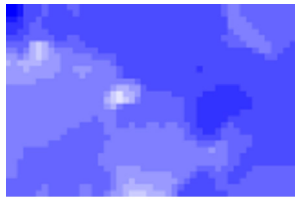

CTCCC+GGGAG

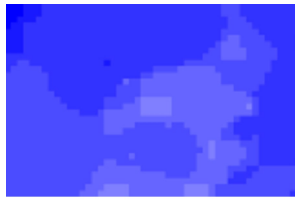

CTCGA+TCGAG

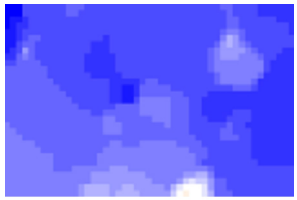

CTCGC+GCGAG

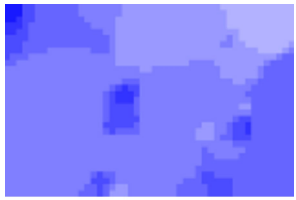

CTCTA+TAGAG

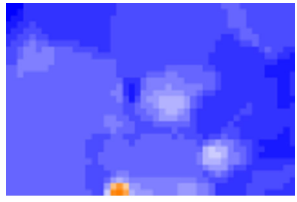

CTCTC+GAGAG

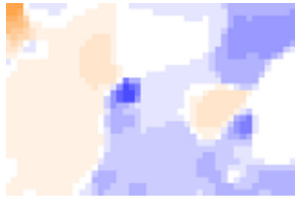

CTGAA+TTCAG

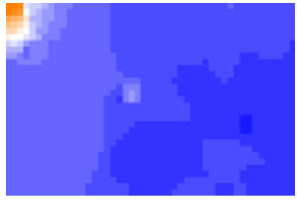

CTGAC+GTCAG

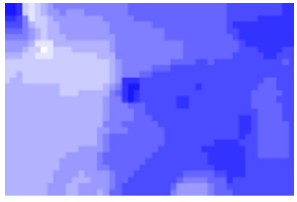

CTGCA+TGCAG

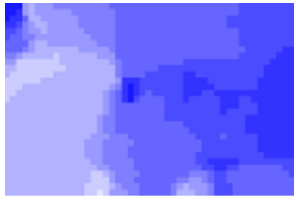

CTGCC+GGCAG

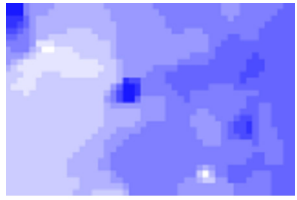

CTGGA+TCCAG

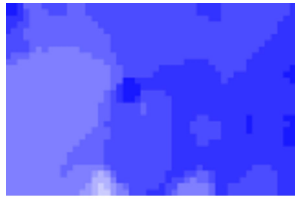

CTGGC+GCCAG

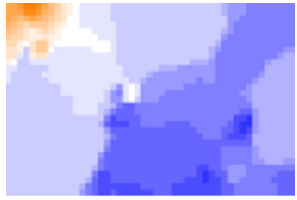

CTGTA+TACAG

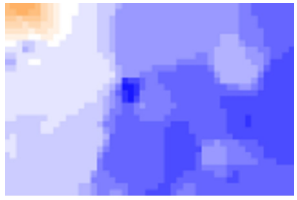

CTGTC+GACAG

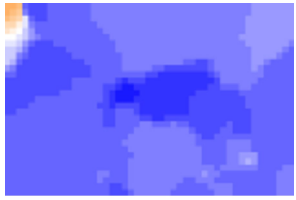

CTTAA+TTAAG

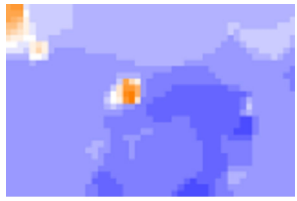

CTTAC+GTAAG

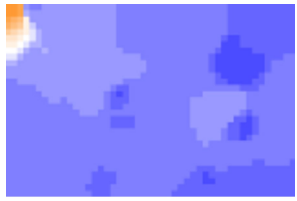

CTTCA+TGAAG

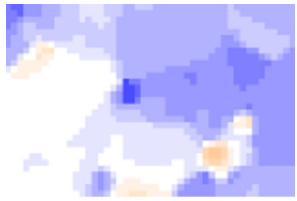

CTTCC+GGAAG

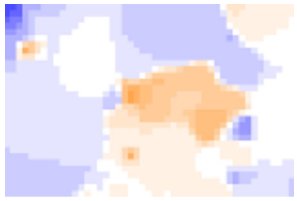

CTTGA+TCAAG

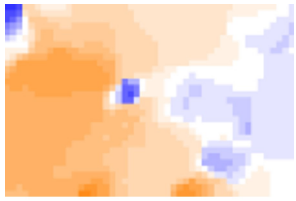

CTTGC+GCAAG

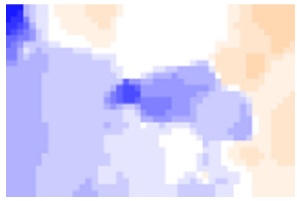

CTTTA+TAAAG

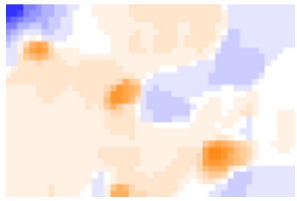

CTTTC+GAAAG

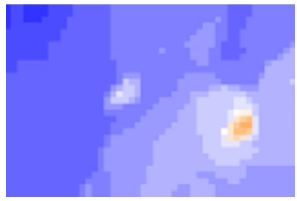

GAAAA+TTTTTC

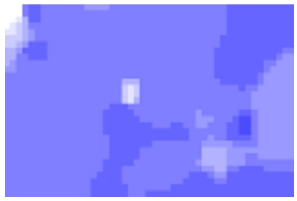

GAAAC+GTTTC

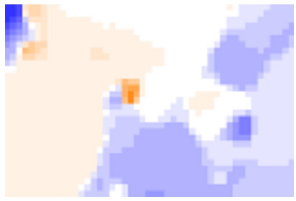

GAACA+TGTTTC

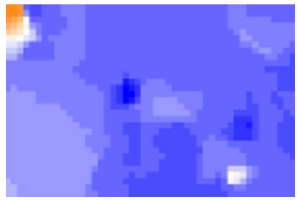

GAACC+GGTTC

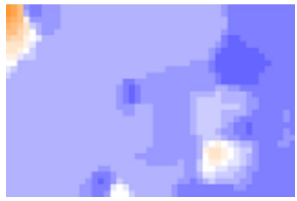

GAAGA+TCTTC

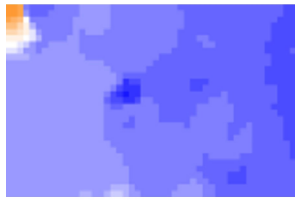

GAAGC+GCTTC

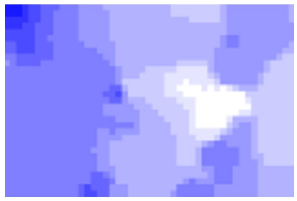

GAATA+TATTC

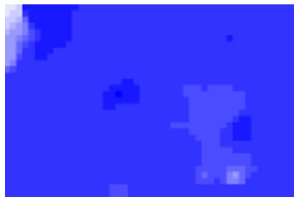

GAATC+GATTC

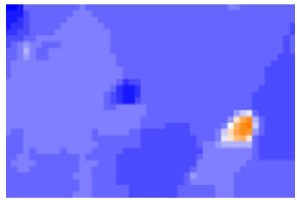

GACAA+TTGTC

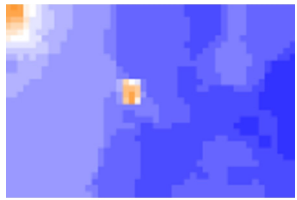

GACAC+GTGTC

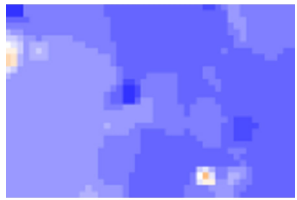

GACCA+TGGTC

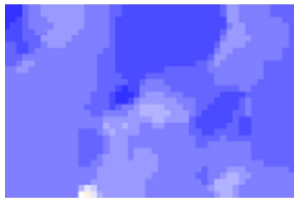

GACCC+GGGTC

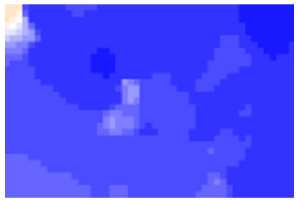

GACGA+TCGTC

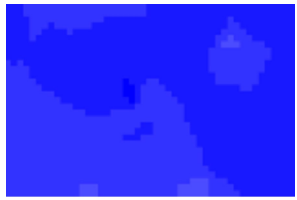

GACGC+GCGTC

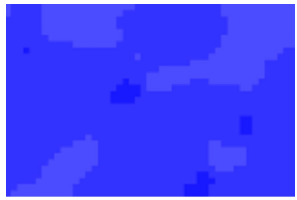

GACTA+TAGTC

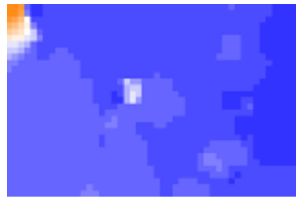

GACTC+GAGTC

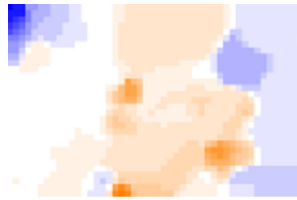

GAGAA+TTCTC

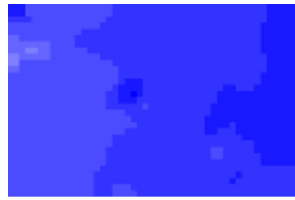

GAGAC+GTCTC

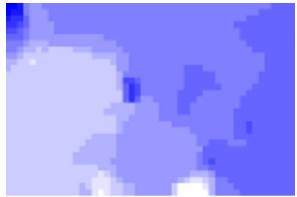

GAGCA+TGCTC

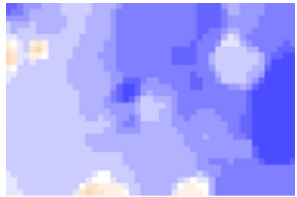

GAGCC+GGCTC

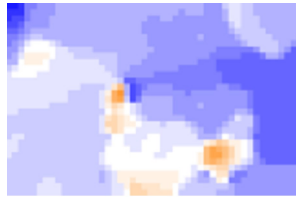

GAGGA+TCCTC

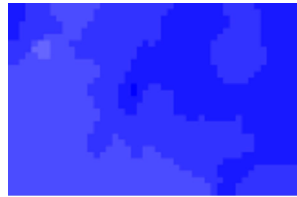

GAGGC+GCCTC

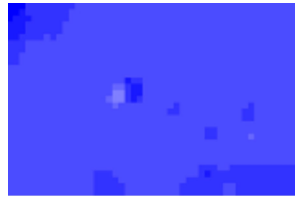

GAGTA+TACTC

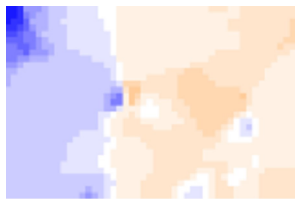

GATAA+TTATC

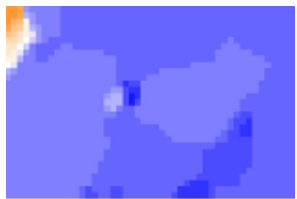

GATAC+GTATC

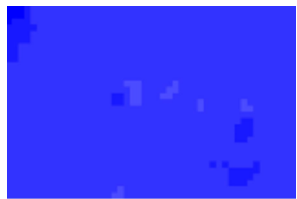

GATCA+TGATC

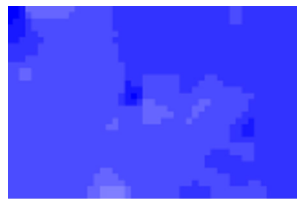

GATCC+GGATC

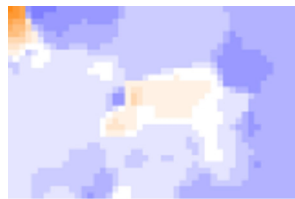

GATGA+TCATC

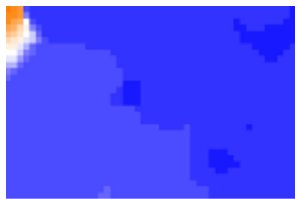

GATGC+GCATC

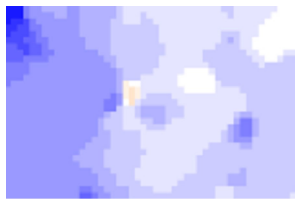

GATTA+TAATC

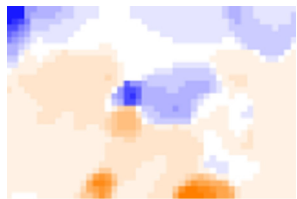

GCAAA+TTTGC

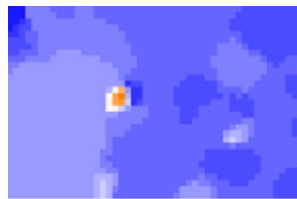

GCAAC+GTTGC

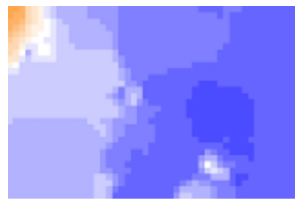

GCACA+TGTGC

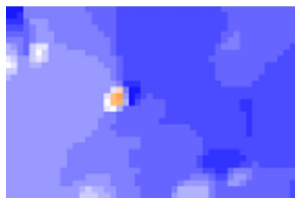

GCACC+GGTGC

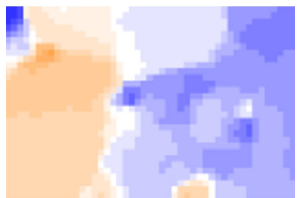

GCAGA+TCTGC

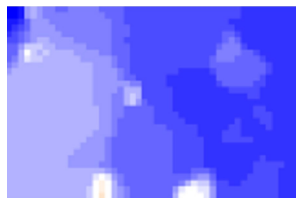

GCAGC+GCTGC

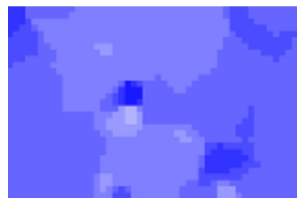

GCATA+TATGC

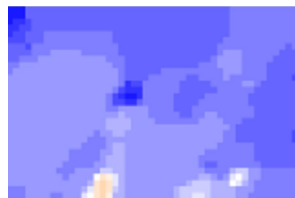

GCCAA+TTGGC

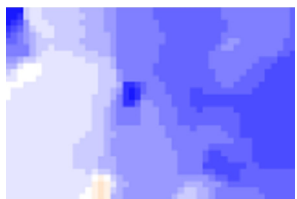

GCCAC+GTGGC

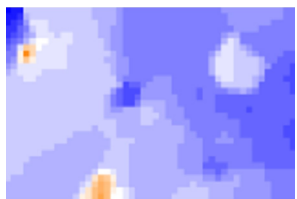

GCCCA+TGGGC

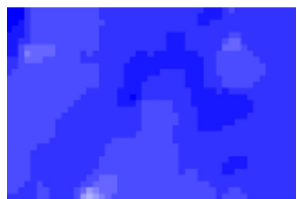

GCCCC+GGGGC

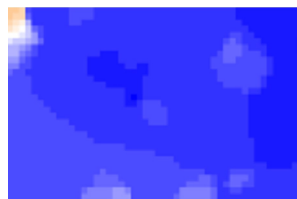

GCCGA+TCGGC

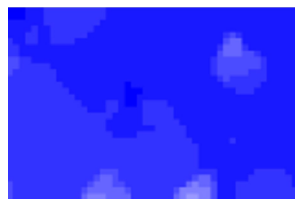

GCCGC+GCGGC

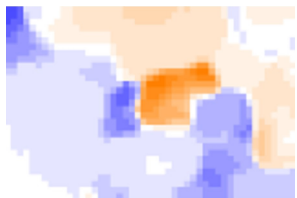

GCCTA+TAGGC

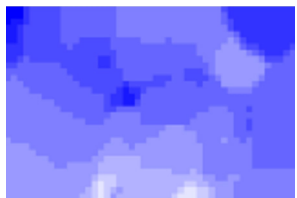

GCGAA+TTCGC

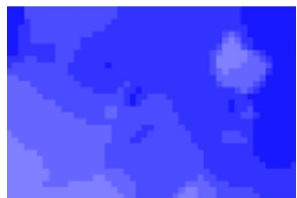

GCGAC+GTCGC

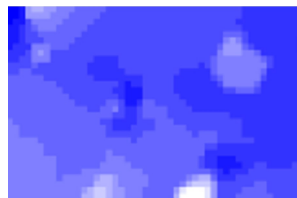

GCGCA+TGCGC

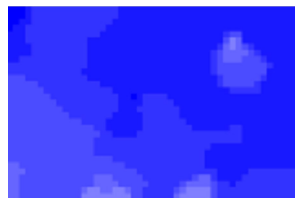

GCGCC+GGCGC

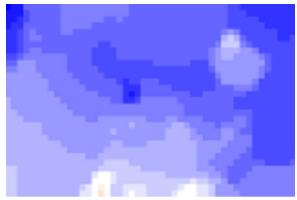

GCGGA+TCCGC

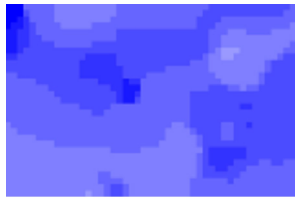

GCGTA+TACGC

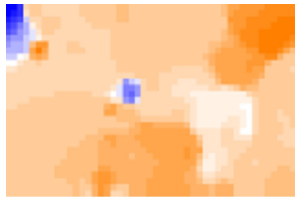

GCTAA+TTAGC

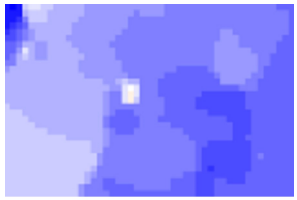

GCTAC+GTAGC

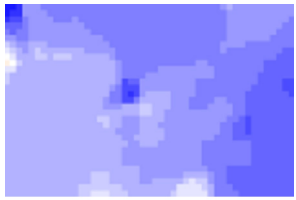

GCTCA+TGAGC

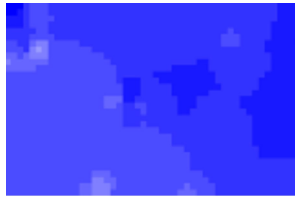

GCTCC+GGAGC

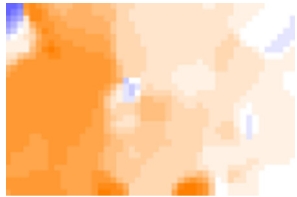

GCTGA+TCAGC

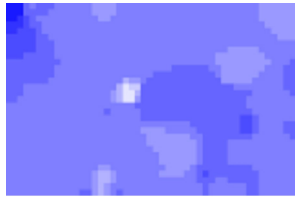

GCTTA+TAAGC

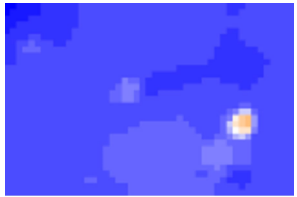

GGAAA+TTTCC

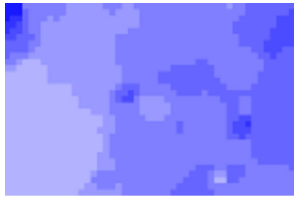

GGAAC+GTTCC

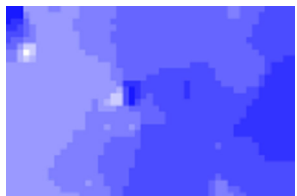

GGACA+TGTCC

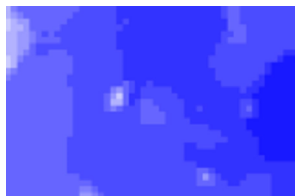

GGACC+GGTCC

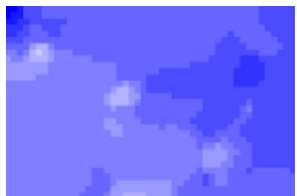

GGAGA+TCTCC

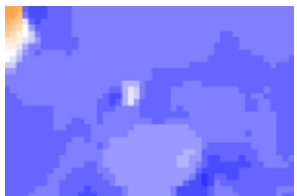

GGATA+TATCC

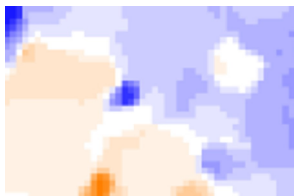

GGCAA+TTGCC

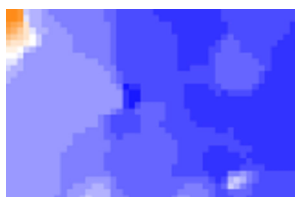

GGCAC+GTGCC

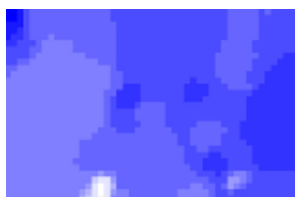

GGCCA+TGGCC

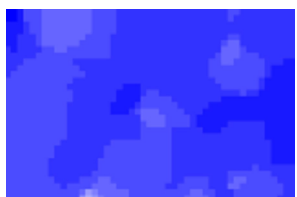

GGCCC+GGGCC

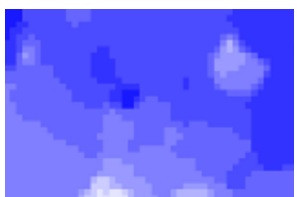

GGCGA+TCGCC

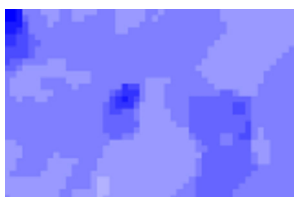

GGCTA+TAGCC

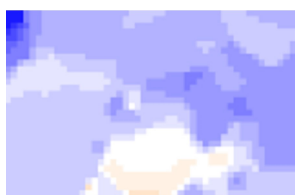

GGGAA+TTCCC

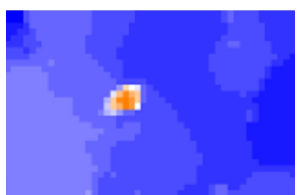

GGGAC+GTCCC

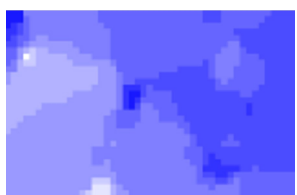

GGGCA+TGCCC

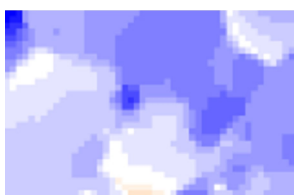

GGGGA+TCCCC

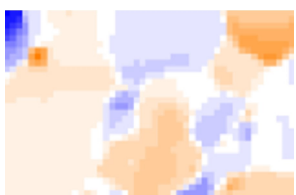

GGGTA+TACCC

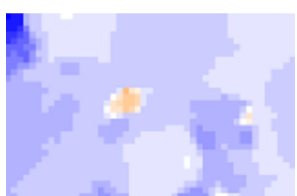

GTAA+TTACC

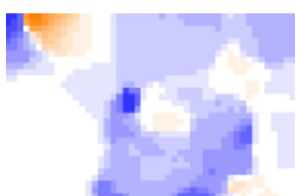

GTAC+GTACC

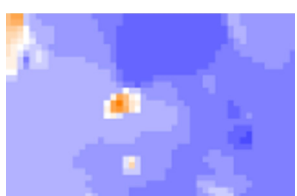

GTCA+TGACC

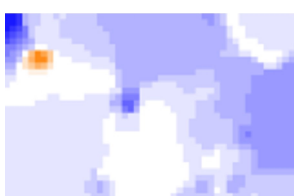

GTGA+TCACC

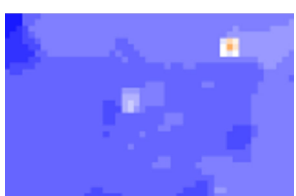

GTTA+TAACC

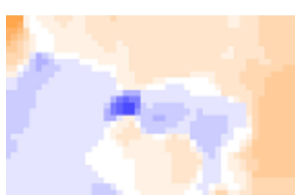

GTAAA+TTTAC

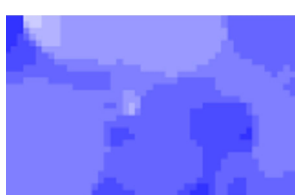

GTAAC+GTTAC

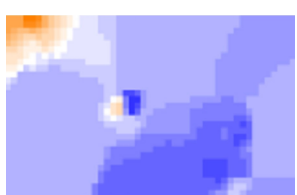

GTACA+TGTAC

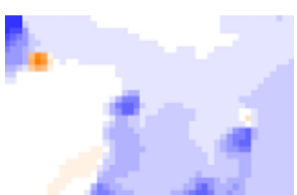

GTAGA+TCTAC

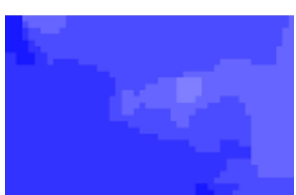

GTATA+TATAC

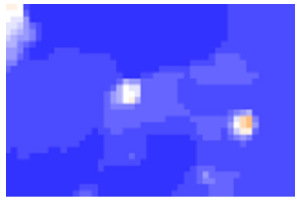

GTCAA+TTGAC

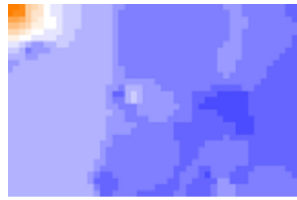

GTCAC+GTGAC

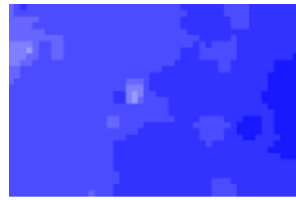

GTCCA+TGGAC

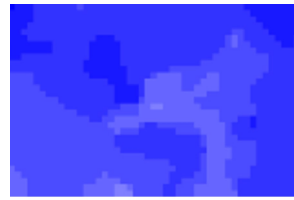

GTCGA+TCGAC

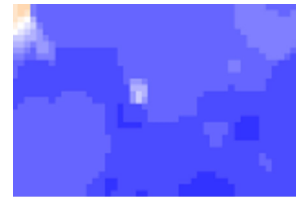

GTCTA+TAGAC

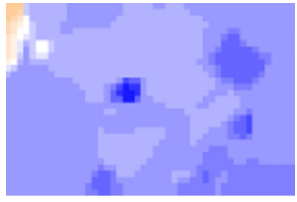

GTGAA+TTCAC

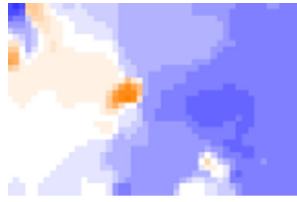

GTGCA+TGCAC

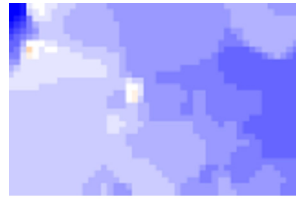

GTGGA+TCCAC

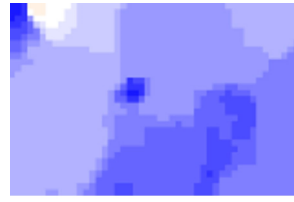

GTGTA+TACAC

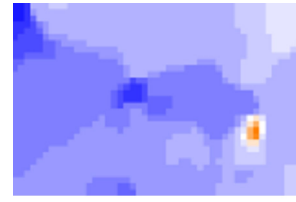

GTTAA+TTAAC

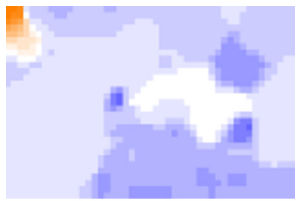

GTTCA+TGAAC

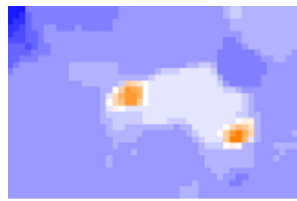

GTTGA+TCAAC

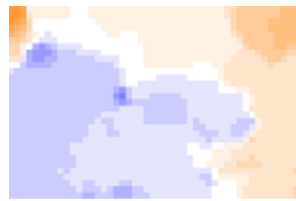

GTTTA+TAAAC

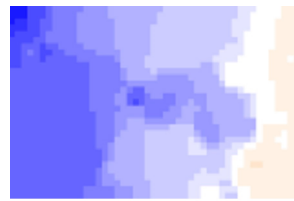

TAAAA+TTTTA

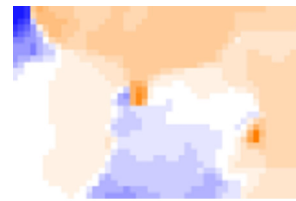

TAACA+TGTTA

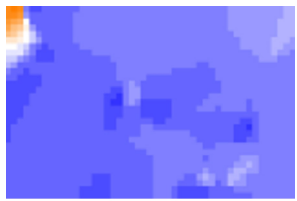

TAAGA+TCTTA

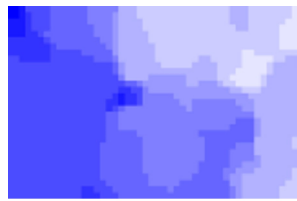

TAATA+TATTA

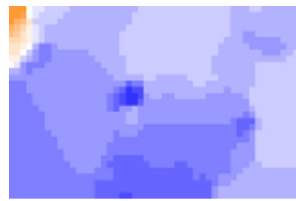

TACAA+TTGTA

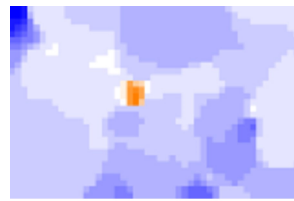

TACCA+TGGTA

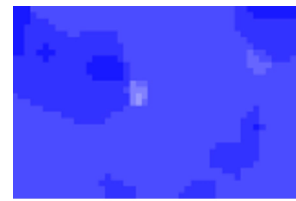

TACGA+TCGTA

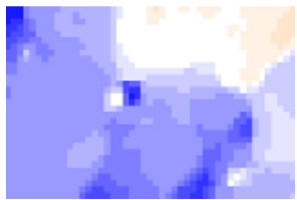

TACTA+TAGTA

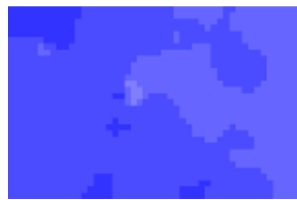

TAGAA+TTCTA

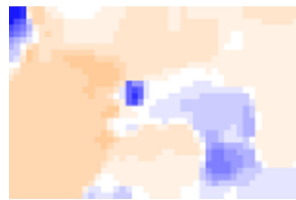

TAGCA+TGCTA

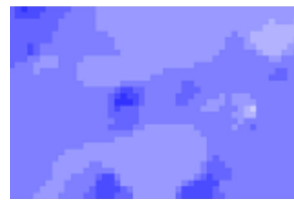

TAGGA+TCCTA

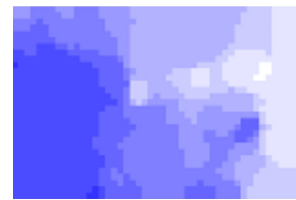

TATAA+TTATA

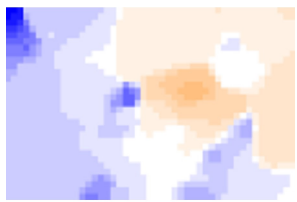

TATCA+TGATA

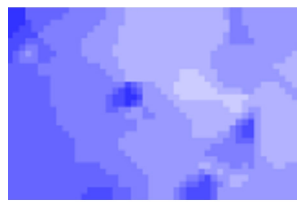

TATGA+TCATA

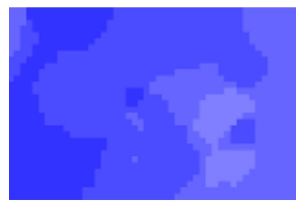

TCAAA+TTTGA

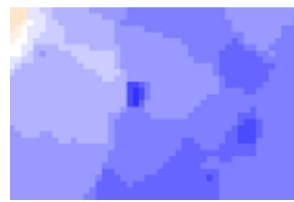

TCACA+TGTGA

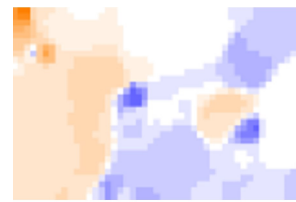

TCAGA+TCTGA

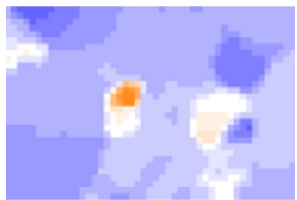

TCCAA+TTGGA

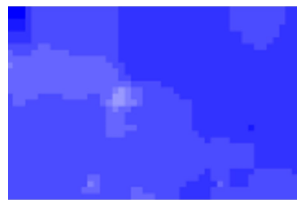

TCCCA+TGGGA

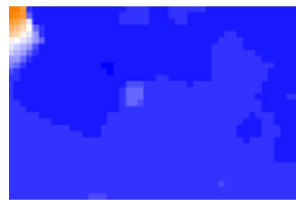

TCCGA+TCGGA

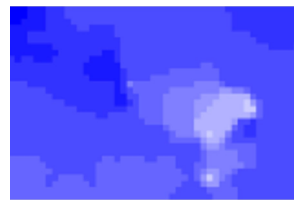

TCGAA+TTCGA

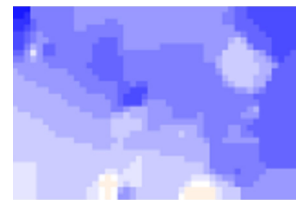

TCGCA+TGCGA

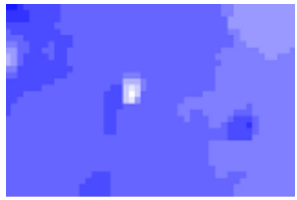

TCTAA+TTAGA

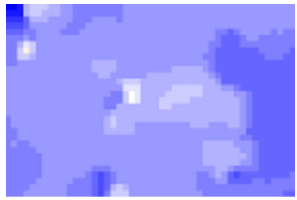

TCTCA+TGAGA

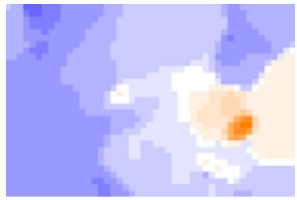

TGAAA+TTTCA

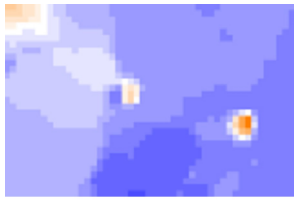

TGACA+TGCA

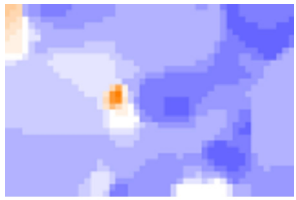

TGCAA+TTGCA

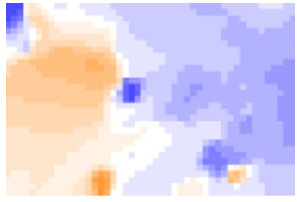

TGCCA+TGGCA

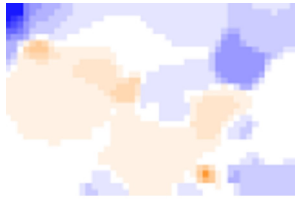

TGGAA+TTCCA

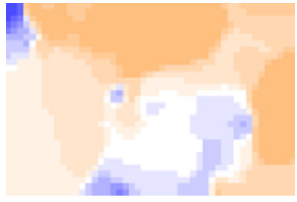

TGTA+TTACA

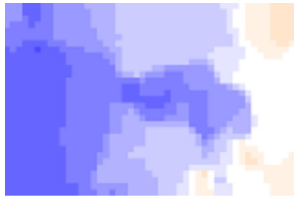

TTAAA+TTTAA

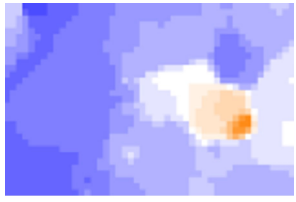

TTCAA+TTGAA

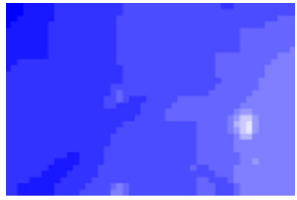

AAAAA+TTTTT

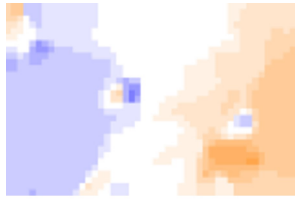

AAAAC+GTTTT

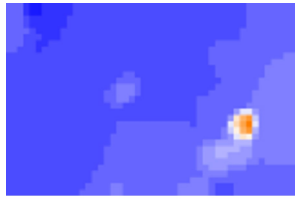

AAAAG+CTTTT

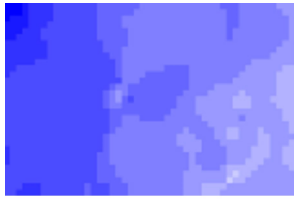

AAAAT+ATTTT

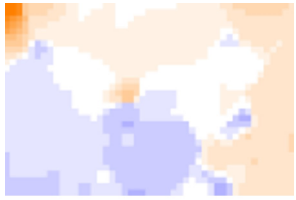

AAACA+TGTTT

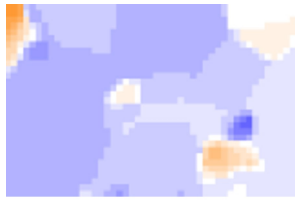

AAACC+GGTTT

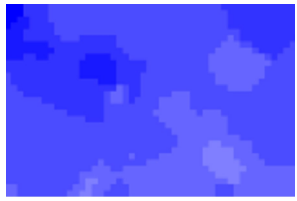

AAACG+CGTTT

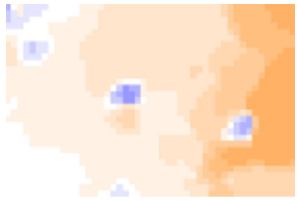

AAACT+AGTTT

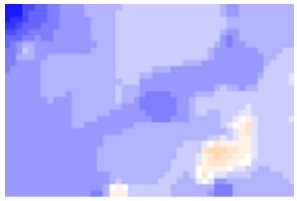

AAAGA+TCTTT

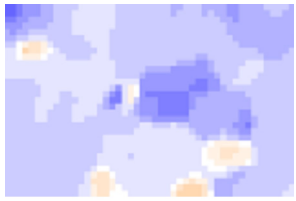

AAAGC+GCTTT

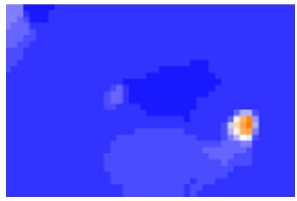

AAAGG+CCTTT

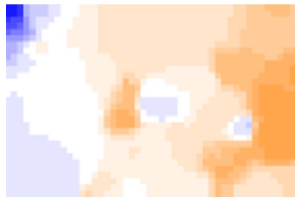

AAAGT+ACTTT

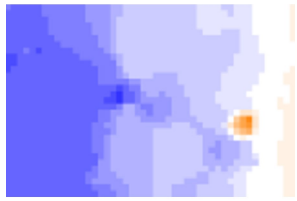

AAATA+TATTT

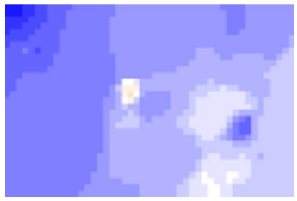

AAATC+GATTT

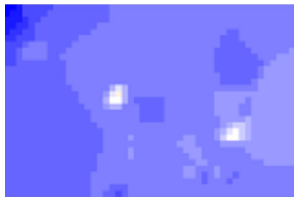

AAATG+CATTT

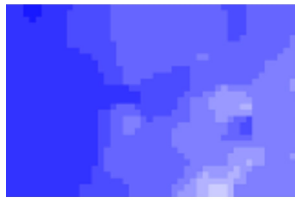

AAATT+AATTT

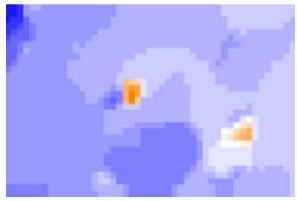

AACAA+TTGTT

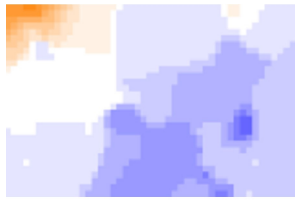

AACAC+GTGTT

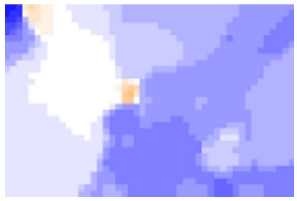

AACAG+CTGTT

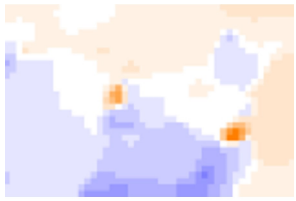

AACAT+ATGTT

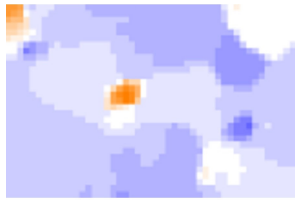

AACCA+TGTTT

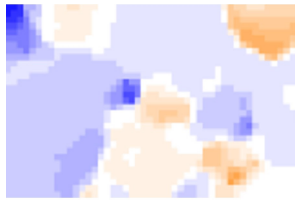

AACCC+GGTTT

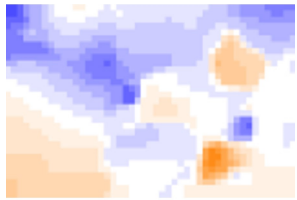

AACCG+CGTTT

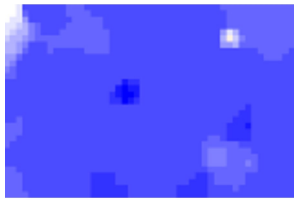

AACCT+AGTTT

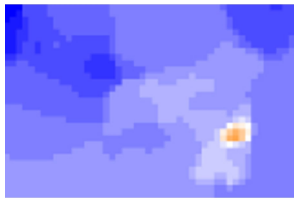

AACGA+TCGTT
