# Supplementary material for: Unsupervised AI reveals insect species-specific genome signatures
Source: PeerJ. 2024 Mar 6;12:e17025. doi: 10.7717/peerj.17025 (PMC10924456; doi:10.7717/peerj.17025)
Supplement: Supplemental Information 29 [file peerj-12-17025-s029.xlsx]

## Sheet: Fig. 2Ai
Pediculus humanus corporis	Periplaneta americana	Harmonia axyridis	Folsomia candida	Anisolabis maritima	Campodea augens	Drosophila melanogaster	Cloeon dipterum	Schizaphis graminum	Aphidius gifuensis	Reticulitermes speratus	Aricia agestis	Columbicola columbae	Chrysoperla carnea	Ischnura elegans	Schistocerca americana	Timema cristinae	Brachyptera putata	Ctenocephalides felis	Mengenilla moldrzyki	Thrips palmi	Limnephilus lunatus
25.2883	33.7133	34.0911	35.2536	28.4053	30.6236	42.1091	41.3828	25.112	21.7005	42.4549	39.8381	33.2392	26.837	37.8028	36.6613	31.8449	37.4415	27.4719	27.842	45.2261	35.544
26.4281	33.261	34.2533	34.7646	30.634	30.3072	48.3338	40.1355	24.2129	20.6888	39.8782	36.4875	33.9993	27.563	38.9627	38.6382	31.049	38.3536	26.666	28.2446	46.9004	34.654
25.5843	33.2742	35.2392	35.2591	28.11	30.814	44.5247	40.9956	24.9394	20.2006	39.5075	35.4178	34.8267	27.4226	37.7166	39.2158	30.6386	35.1607	28.5635	27.5907	57.6577	35.7103
26.1611	33.0635	34.5311	34.9334	27.282	31.6592	40.3663	40.76	24.1507	21.1441	38.0341	35.0822	34.0641	27.3591	38.3037	41.4545	31.4601	33.689	27.6322	27.118	58.3135	33.8728
26.4488	33.2536	33.6832	35.5757	26.092	29.2386	42.2022	39.5938	24.5315	22.4003	38.0383	36.0468	34.175	26.9697	37.8359	45.6884	31.8045	32.2313	27.663	26.9564	61.2837	34.0209
24.7528	33.4969	33.6132	35.0394	26.9959	30.0155	43.0713	40.3521	25.4755	23.3702	39.3121	36.0677	32.4647	27.2167	39.4134	45.9284	31.857	32.9589	28.5529	26.881	60.7355	34.8901
24.3159	33.6144	34.5423	34.8725	27.2619	30.1915	43.347	40.891	25.3983	22.6396	36.9359	34.657	33.0843	27.9981	39.0632	46.0929	30.9811	32.0078	28.3033	27.2099	61.5689	34.7052
23.2051	33.1178	31.8628	35.1366	27.0467	29.8095	41.4802	38.3948	24.4814	22.3184	36.5461	34.8104	35.1351	27.5956	39.2965	46.2862	30.3812	33.2327	28.5273	26.7114	59.0408	33.8909
24.8753	33.2561	33.8741	34.8409	25.7946	30.1125	41.4553	40.9849	23.5806	22.327	40.2715	34.3625	31.9989	27.7983	37.7495	45.4226	29.7642	35.1701	28.2976	26.8701	62.7876	35.3624
24.892	33.4046	33.8421	34.9707	27.2384	30.3809	41.7641	39.9966	24.9433	22.7527	36.7615	34.3148	31.7714	27.519	37.1695	39.1654	28.3328	35.5775	29.7276	27.3442	59.2773	34.3634
25.9353	33.6679	32.7551	35.0217	28.2021	29.6506	42.1592	40.3135	26.7267	24.2613	39.8807	34.5673	30.6487	27.6812	37.4869	36.2887	30.4683	33.4571	28.368	27.0686	61.019	34.899
23.6494	33.7738	32.9509	34.9807	26.5384	30.9874	41.7736	39.4764	23.5416	25.4106	37.2036	34.7552	31.7265	27.6339	37.1965	37.4852	31.0883	32.8765	27.6079	27.1666	60.0579	33.3517
25.0237	33.0424	32.4848	35.1674	26.578	30.6269	40.0438	40.8459	25.6935	26.6965	36.0003	34.6667	31.791	27.7075	37.0561	41.0754	31.9037	32.0696	27.9218	27.5143	58.7723	34.4449
25.7089	33.4681	32.6958	35.0855	27.1718	31.0917	40.8072	40.8422	22.5627	27.2966	37.1785	34.8724	33.3524	27.302	38.7652	36.9127	29.4883	31.2572	27.1848	26.7905	46.9203	33.9302
24.7892	32.9923	32.1729	34.8661	29.8991	29.6737	41.2473	38.244	23.547	27.3691	38.4237	34.3892	33.127	26.8698	38.687	36.1155	29.8065	32.4313	27.4198	27.006	45.6452	34.6841
25.3381	33.5058	31.0548	34.641	26.8281	31.2464	41.8393	39.1325	24.6048	27.0902	36.5654	34.8286	33.8492	26.7756	36.5071	38.1569	31.26	31.6613	27.5162	26.576	44.4955	32.9305
24.5708	34.0553	32.9263	34.7307	26.6118	30.3839	41.1846	39.633	25.052	27.075	36.7326	35.0768	32.0432	27.0521	35.9657	39.8772	30.7427	32.751	27.5587	26.9827	56.4393	32.7427
24.1114	32.5676	32.7835	34.8245	29.3917	30.1743	42.1147	40.2656	25.9733	27.2826	36.2975	33.994	33.3925	26.7467	38.8021	42.2088	33.8239	31.4732	27.6929	26.4998	57.2629	33.7731
26.0681	33.2694	33.6432	35.2049	27.7831	29.2957	44.5524	40.351	25.1312	27.3792	36.3466	35.4137	33.4768	27.2126	39.5317	43.1786	31.1935	31.8892	27.261	26.3702	56.8507	33.3202
27.3453	34.2517	33.537	35.5056	26.508	29.1891	44.1615	40.043	25.0724	26.7005	36.3507	35.7838	33.3721	26.6209	39.4449	43.1981	31.5882	32.8091	26.9724	25.9683	58.0718	32.9412
24.1176	33.2958	32.0416	34.9147	27.3625	30.8242	42.441	41.0433	24.1183	23.7583	37.4625	34.4815	34.9932	27.2222	37.7339	40.7308	31.773	32.2599	27.906	26.0884	57.6963	32.6655
25.1447	32.8445	31.9449	34.7707	25.7571	29.8549	40.7899	41.7639	23.8238	22.7136	36.7682	35.0389	34.8271	26.7423	38.2521	42.1978	30.8589	32.9358	29.3587	26.3398	59.7681	32.1257
25.6219	32.3625	31.556	35.0662	26.3095	30.2376	39.4672	40.9363	24.8801	22.2131	37.4237	34.8458	34.7616	26.9348	28.9912	38.3634	32.1301	32.9923	27.7366	26.7392	60.4963	32.7582
26.4133	33.0516	31.1722	35.0362	26.3328	30.6823	43.3382	39.5565	24.6299	22.3784	38.7744	35.3052	37.0364	26.6031	36.9703	36.2062	31.5324	32.7954	27.8315	27.2593	61.3234	31.8161
23.8203	33.3627	31.7688	35.4302	26.4506	30.7321	42.4722	41.2449	24.5621	21.6579	37.9405	35.9076	34.7297	26.3607	37.1271	37.8684	33.3309	33.4103	27.7771	26.6852	59.3089	32.0339
25.8485	34.3736	31.7075	36.3967	27.4001	30.6477	40.9256	40.0901	23.7792	22.4189	37.3712	35.0975	33.7123	26.7393	37.6901	41.0479	30.3869	34.0217	25.7906	27.2106	61.5824	33.0647
24.104	34.25	31.1932	34.9224	26.2921	30.8065	42.6668	41.5455	24.5226	23.7748	36.6104	36.9213	33.4431	25.8452	37.6315	44.1438	31.2471	32.5916	26.9103	26.8929	54.5589	32.5215
25.3424	33.1767	31.3951	35.4269	27.8988	30.2367	41.8234	39.4452	25.3153	22.92	39.6923	38.5159	32.6272	26.687	36.8973	46.2377	31.5837	33.7489	27.21	26.6337	54.9454	32.522
27.275	33.5458	30.9255	35.0489	26.3271	30.2749	42.6365	40.4985	25.7722	21.7295	36.4227	41.9486	32.5274	26.5666	37.2401	37.9821	31.7835	32.5711	26.703	27.5462	56.6999	32.6711
24.6989	34.5067	30.8768	35.4639	29.5176	31.1766	43.2656	40.2448	23.8103	20.8852	37.4452	35.537	33.1104	27.0911	36.9586	42.2999	31.7039	31.2677	26.3458	27.6083	57.325	32.5169
25.9285	34.0757	31.8417	35.6717	28.2065	31.0393	43.1109	40.7662	24.0047	22.1419	37.2446	35.5182	32.2843	26.3471	36.4928	43.7926	30.3535	32.4069	26.7588	27.1445	61.3759	33.4269
25.2115	32.6686	31.1252	35.2839	26.3001	30.264	41.7278	39.7259	24.5742	21.4756	36.4729	35.1069	35.9429	26.6365	38.5936	46.8162	32.5432	31.9454	26.6914	26.9195	62.1791	31.7755
26.9145	33.8221	31.8927	35.4054	26.2021	30.1214	41.7105	40.2233	24.8278	22.3014	35.1254	34.06	35.1933	26.5748	37.0526	43.1967	31.3837	31.7895	27.3689	27.0773	62.1836	32.6881
26.5717	33.2026	31.2533	35.7735	26.4974	30.3779	42.512	41.3296	23.7569	20.6286	36.8587	34.1055	33.5892	26.7673	35.7066	42.2399	32.1606	31.9085	26.5124	26.5639	61.3796	32.0264
26.7436	32.91	31.0556	35.4418	28.4401	30.7594	43.2469	40.0338	24.443	21.8261	36.4119	34.5124	32.5696	26.1586	38.8037	39.2306	31.2967	31.747	27.1987	27.2609	63.2065	31.6155
25.442	33.2006	30.8786	35.7748	25.8986	29.8539	41.5519	39.9468	23.9739	20.7678	37.8242	35.1705	34.5464	26.5126	37.1038	43.1193	33.4764	33.0299	25.8771	27.0772	59.8967	32.7525
23.7929	33.2073	30.9863	35.2918	26.1863	30.2959	42.3588	40.3288	25.5746	22.5146	36.1417	34.5599	34.0347	26.5157	36.5076	42.3051	30.9146	32.9917	26.9158	26.8282	56.7201	31.6718
23.7951	34.1533	30.947	35.477	28.8025	30.3591	42.171	40.463	23.1827	23.0443	35.7223	33.9599	35.2219	26.3267	36.9802	41.5769	30.3903	30.3158	28.791	27.1177	58.2567	32.2027
25.9538	31.8663	31.4967	36.1489	25.8315	31.3304	41.8563	42.913	22.9687	23.1341	38.6484	34.3806	35.0986	26.4828	36.9459	40.7661	29.2585	31.4612	26.5278	26.4524	58.8118	32.6476
24.4801	33.2206	31.5791	35.936	27.4643	29.9969	41.9372	39.1447	23.2997	22.418	37.0036	34.0433	35.8599	26.3557	36.0363	40.6723	30.8736	32.1245	27.1895	26.47	57.5273	32.101
25.7705	32.633	30.9798	36.6558	27.4252	30.7877	42.855	39.7015	25.0166	22.0568	37.244	33.9485	35.6793	26.2776	38.224	40.6031	30.9403	32.5867	25.9802	26.4028	61.3572	32.6282
24.4922	33.1822	29.7657	39.3011	26.8993	30.0201	43.2759	42.5802	26.9373	23.1751	37.3324	33.8157	35.8404	26.3064	37.6759	41.2978	30.6634	33.1832	24.7445	26.8784	59.3453	32.4656
24.9363	34.1788	31.9518	39.8401	26.1558	30.5189	43.8939	40.4532	22.6809	26.6024	36.953	35.3158	35.1861	25.353	37.1648	41.9959	31.6449	34.9698	25.3282	27.0584	58.6333	32.1497
26.7635	34.3074	31.7905	40.5225	26.4544	29.8897	42.4976	43.1287	26.1086	26.7243	36.1533	41.9795	33.8352	25.8208	38.708	40.583	29.5988	35.266	25.558	26.5513	59.4448	32.4653
25.9865	33.1199	31.6917	38.1227	27.1112	30.8804	41.6775	40.5256	24.4534	26.9389	38.8411	36.5814	34.2431	25.8903	38.7723	40.1849	32.1731	35.3385	26.2829	27.2755	53.1398	32.4643
24.6291	34.1044	32.5174	32.9621	26.8388	31.1256	44.3348	40.4195	24.4576	26.7677	36.8817	36.0502	35.578	25.9914	35.9631	40.1587	31.7144	33.3658	25.2414	27.5248	44.7533	32.9476
23.9005	33.4537	32.1756	33.4502	26.0234	30.5215	44.4193	39.0023	23.7158	26.8942	36.6448	36.2688	34.9231	25.2032	37.6932	41.6106	31.7291	34.6152	25.5063	27.5427	45.1144	32.3494
24.5402	32.8423	31.8647	33.7145	26.7915	30.4486	45.1626	40.2537	23.8711	27.5208	38.2862	35.6793	36.0561	26.9167	38.3984	41.3663	32.3522	31.6145	26.4524	26.2194	45.3396	33.8434
24.7504	33.593	31.9326	36.3175	27.6828	31.0159	44.0456	38.3977	22.9558	27.0758	37.9529	34.8792	34.3789	26.2807	37.9747	39.5524	31.4036	32.3112	27.0998	27.0836	44.7826	32.5283
25.2602	33.558	32.1433	36.319	26.585	30.1112	44.7485	40.7745	24.5664	27.3329	35.8171	34.4703	34.9761	26.7425	35.7365	40.6479	31.7282	31.9362	26.1017	27.0962	47.7872	32.4914
25.0667	33.0749	32.0857	36.1846	26.0625	30.6851	41.9657	41.4294	24.0148	27.0784	36.4473	35.3843	34.273	26.3506	36.14	41.7862	31.2589	31.8957	27.4999	27.2479	51.111	32.1935
25.5873	34.5199	31.3726	36.0146	26.8238	31.1269	45.1944	39.4215	23.6428	27.1805	36.188	34.025	32.0994	26.0652	35.7267	40.1534	32.2667	32.9028	27.1309	26.5596	57.5586	33.8239
23.7604	32.2373	31.6082	35.8948	27.7106	29.9341	44.4186	37.8594	23.1985	27.6425	34.0707	35.1215	30.7538	26.1238	37.2384	37.5991	34.3601	34.2251	25.5852	26.4798	58.6629	32.8424
24.1155	33.0045	31.512	35.92	26.3762	30.1573	42.5778	39.3254	21.311	27.0469	35.0042	39.1577	32.4843	26.7961	36.9182	37.4577	34.6449	32.9762	27.419	26.3139	56.6445	32.3252
26.0445	33.6665	31.3244	37.0973	26.0114	30.572	42.3677	40.6659	28.1446	25.535	36.5167	34.7664	32.7905	26.9863	36.9694	37.2849	33.8229	32.8464	26.6017	25.9754	61.5419	32.5106
26.2461	33.1274	29.9554	36.3597	26.7124	31.4011	41.5287	39.4421	28.7359	24.1797	37.7146	36.1735	34.0272	26.4419	36.4327	37.8083	31.9211	31.1578	26.0508	26.6434	58.0582	32.8551
23.3705	33.4527	32.3414	33.6274	26.1135	29.7453	42.7896	39.2517	26.0043	22.4101	37.9017	34.7031	33.9765	26.2344	36.4969	41.9372	34.4295	33.2061	25.9132	25.7287	58.4547	32.2842
23.3246	33.2832	31.1248	34.3463	26.5196	30.6395	42.5115	42.0539	26.7073	22.4909	42.8193	35.3588	33.8068	26.6108	37.6237	42.1679	32.314	31.0572	26.4813	25.5761	61.6662	32.9436
23.2957	34.1303	31.8741	37.0614	26.7289	31.1293	41.7679	41.4266	24.2974	22.051	41.3	34.2082	35.9382	25.7446	35.635	40.4685	31.3198	32.9285	27.3954	25.622	59.0476	32.5994
26.1901	33.7552	31.3632	37.3079	26.2487	30.058	42.0069	41.416	26.7645	21.4917	38.5786	33.3469	35.5023	25.7618	37.636	39.2925	31.2176	30.8168	26.5122	25.7109	54.3951	32.4392
26.8633	33.3507	32.2923	37.356	26.2275	31.2493	40.1756	39.2049	24.5156	21.5917	39.9847	33.862	34.2862	26.5867	37.8782	40.3271	29.9847	34.9856	26.4762	25.9834	57.1901	33.1278
26.8712	33.4654	32.2123	37.739	27.3722	30.0441	40.4403	39.1707	24.3948	22.2149	37.7793	34.1914	32.5153	26.0748	36.778	40.8058	30.9439	38.1366	26.2358	26.4436	59.6471	32.3558
26.7389	33.8307	31.4973	36.8861	26.7174	31.1577	42.1366	39.2012	27.1495	22.422	37.1187	33.0948	34.0067	25.6438	37.7776	43.0492	31.3213	38.7153	26.3574	26.6825	58.903	32.3215
25.2482	33.9796	31.7677	36.3742	26.6683	30.689	41.6351	41.9326	23.9158	21.749	37.9734	32.0071	34.4261	25.9751	36.0907	42.5606	31.9424	37.7076	26.3924	26.9435	60.1244	32.029
25.3807	34.1914	31.7283	36.2986	26.3936	29.9993	39.6903	37.6188	26.3792	22.3739	40.2202	33.8744	33.5919	26.2105	36.9238	41.7869	31.9461	35.6546	27.03	26.5736	62.021	32.7969
27.0056	33.2258	31.4147	34.9406	25.8772	30.6972	39.7648	40.7825	26.214	21.6441	36.8335	34.9729	34.3731	25.83	37.0671	41.1529	31.2594	35.6524	25.8974	27.105	61.6138	33.5206
25.5192	33.0847	31.6484	35.5142	27.1395	30.607	41.1026	39.573	26.8197	21.3676	37.3154	33.9345	35.5334	26.3346	37.8265	41.4674	32.7562	35.188	25.8465	27.0414	61.9938	33.2674
25.9381	33.1878	32.3499	35.3118	27.0614	30.4271	41.975	41.6936	23.9201	23.9325	37.238	35.3102	36.0489	25.9594	35.799	41.6537	31.6908	34.6006	25.3187	27.0034	60.0525	32.2293
26.0357	32.9056	32.5479	35.4377	27.021	30.9049	38.6111	40.6838	27.8986	23.2906	37.1459	35.2268	35.0152	25.9681	36.6938	41.3473	32.6123	32.3486	25.8316	27.0086	61.8249	32.6387
27.3141	33.3708	32.2672	35.4664	26.1858	29.7663	40.7225	41.5436	24.5715	22.4306	39.0259	34.968	34.4986	26.0637	38.4558	41.3231	31.1305	32.513	26.8707	26.8587	60.7551	32.657
26.0004	32.8537	32.0835	35.1836	26.5162	30.7428	41.5081	41.6326	23.6135	25.3802	36.9557	35.6075	33.0597	26.1359	38.7	41.8954	32.0258	32.9059	26.1911	27.3095	58.2996	32.7567
23.8427	33.476	32.4282	35.016	27.7941	31.309	41.8739	39.9344	24.7876	25.9086	35.1728	35.661	32.3565	26.3554	36.9431	41.8126	32.8716	34.7561	24.7922	26.6802	58.2697	33.0461
25.4488	33.5247	32.557	35.0461	26.5778	30.0705	44.1641	39.9038	25.6612	27.5161	39.0549	35.5227	33.7666	26.15	37.2668	42.021	32.7882	33.6088	25.242	26.8327	60.551	32.4025
23.727	33.4752	32.471	34.9793	27.3801	30.1977	39.2654	39.4675	24.2396	26.9496	39.5237	35.9827	35.6089	26.0104	36.4561	41.9023	33.7569	33.5532	25.6324	26.8506	54.6797	33.3056
25.7083	32.8582	32.5668	34.855	26.4881	30.3045	38.0218	42.6318	23.5644	26.669	37.8639	35.677	35.1881	26.4045	38.337	42.7516	32.6841	33.4048	25.5074	26.4698	44.6828	32.802
25.1216	32.7905	33.7376	35.2189	26.3574	30.3133	38.5395	42.9683	26.6503	27.2283	38.2018	37.3654	35.5186	25.9371	41.3159	44.0468	31.3617	32.3822	26.2959	26.8426	46.4029	33.0277
26.1889	33.1307	32.5213	35.2476	26.6989	30.9451	39.641	42.3605	25.1961	27.3983	37.2086	37.4551	36.0909	25.8359	37.5316	41.9512	31.5603	32.7265	26.6519	26.9171	45.033	31.4376
26.652	32.799	33.7845	35.0928	26.4198	30.4884	43.2669	40.6612	24.0696	26.3903	36.7373	38.3139	33.7292	25.4345	36.2878	41.9348	30.3398	33.2136	26.6517	26.8449	45.4575	33.0344
28.6232	33.1456	33.1616	35.159	27.9843	30.7077	44.6539	39.6104	24.0036	25.8612	36.1938	35.6032	33.6581	25.7193	36.2428	41.7256	32.2908	33.3807	26.1289	26.795	45.5623	32.5899
26.9705	33.0661	33.7007	35.1985	26.3186	30.5016	45.0087	41.3141	27.2747	22.9026	37.4857	35.8765	34.1611	26.2575	36.8221	41.0973	31.3702	33.6365	26.0558	26.8861	46.8812	33.0623
27.3338	33.4232	33.2708	35.6103	26.3441	30.8898	42.9885	39.6161	25.6291	21.6888	35.7204	35.8727	36.0099	25.9045	36.2239	41.5878	30.2476	33.3873	26.1132	27.5155	57.0535	31.8446
28.3723	33.4305	34.0752	35.3954	26.6073	31.2231	41.7394	40.1469	23.4067	22.294	37.7849	35.8443	35.4882	26.398	37.0596	41.9265	30.8907	34.3912	26.2538	26.9581	59.985	32.4889
28.0032	32.9393	34.8323	36.1878	26.8096	30.7898	42.9937	39.6837	24.1059	21.4045	39.2636	33.9807	34.8926	25.9795	36.7121	42.43	30.9545	35.2298	26.7958	26.092	57.2392	32.6856
27.1988	33.7712	34.4033	35.2373	27.6721	30.5457	43.2022	39.9649	23.8375	21.2473	36.7163	34.3544	34.0864	26.2034	38.2139	42.22	28.6168	33.6357	26.8211	26.5424	59.3619	33.4081
28.3075	33.2239	33.8944	35.2353	26.9049	30.2515	43.2677	39.0718	24.6348	21.793	37.7742	34.4739	33.9412	26.4885	38.3636	43.6304	28.0872	32.9205	26.6519	26.6333	58.3717	32.4751
27.1012	33.5123	34.8187	35.2716	26.4959	30.6348	42.2263	39.3257	24.115	23.2662	40.2747	34.4534	33.1893	26.2255	36.7712	43.065	30.5901	32.9536	26.7813	26.3529	60.5964	32.2156
24.9794	33.3971	34.6549	34.5634	26.4249	30.898	44.3793	39.8941	26.1573	22.0883	39.619	34.1339	32.8374	26.4399	36.5009	41.1529	30.2715	34.9591	26.9855	26.6836	59.3918	31.9114
26.1182	33.2408	33.4142	35.2758	26.2371	30.7157	42.2939	40.5041	23.9403	21.6813	36.295	34.9197	31.8965	26.4754	37.013	42.4815	29.7842	34.7092	26.7737	26.7446	57.3843	31.9316
27.4988	33.2104	35.2959	34.5568	26.8918	30.0144	42.5331	40.2522	25.1254	21.7169	36.2368	33.4696	32.8533	26.5173	36.4269	41.1408	29.3076	34.2491	26.589	26.4816	61.9012	32.1036
26.8647	33.2385	34.1041	35.724	26.3027	30.6594	42.9141	39.7929	24.0991	21.9736	34.9167	34.0267	33.5717	26.3305	35.7026	42.4555	30.077	33.4001	26.648	26.3038	59.8785	31.91
27.5559	33.3296	35.1312	35.1616	25.9271	30.7958	41.8911	39.6376	22.2679	22.2563	37.1619	34.8854	33.5358	25.8921	35.7722	42.7916	30.4646	34.6245	26.44	25.9183	60.8183	33.1368
27.7291	32.9755	33.6324	37.4222	26.1746	29.9929	44.0007	39.9935	23.9483	21.1971	36.5561	34.3801	34.9479	26.0775	36.9631	41.5687	30.1812	31.0888	27.708	26.2171	57.4463	32.1341
26.2814	32.9802	33.2971	35.7835	26.4795	31.3525	43.3102	38.7645	23.4015	21.2041	36.9992	35.8287	35.0507	26.2046	36.441	43.0883	31.467	32.881	27.7416	26.6595	60.1045	32.077
26.2707	32.7942	31.8972	35.553	26.5099	30.6065	44.8917	40.7334	23.0269	22.5106	39.3829	34.143	36.39	26.1968	37.5768	42.5287	30.5665	32.2153	28.898	26.7365	59.5481	33.1195
24.8149	32.6693	34.9963	34.7901	26.283	30.3889	46.6247	39.5206	25.8185	21.2857	39.1688	35.794	34.1093	26.3191	36.3297	42.598	31.7031	31.5124	28.7386	26.6878	61.3469	33.5149
26.0982	33.1604	34.2597	35.1912	26.52	31.1864	45.4921	39.6951	22.8574	22.0888	38.1427	35.4288	34.2298	26.0116	37.5871	42.424	30.7628	31.8863	28.6721	26.9262	60.3952	32.6498
27.0679	33.6792	34.8357	35.0721	27.2084	30.6239	43.9276	41.5579	27.2124	23.5887	39.6243	35.147	33.513	26.1644	35.6373	42.8555	30.8118	32.2027	29.5477	26.1241	61.1677	33.1681
26.1591	33.1221	33.8584	35.5838	26.8616	31.7932	43.5697	39.2365	28.2698	26.5037	38.4561	36.1934	34.4723	26.6223	36.69	42.554	30.6785	32.4512	28.231	26.3452	59.3112	33.2366
27.8088	32.7899	33.3376	35.0873	27.3419	30.8305	43.4014	39.519	25.6284	27.6057	38.8501	35.7986	36.1854	25.8334	38.5929	42.2244	30.2985	33.6394	28.6325	27.1296	60.5266	33.243
28.8668	33.5949	32.4188	35.5118	26.1742	30.5824	42.4057	40.5803	26.0446	27.2704	39.0453	38.5079	35.328	26.5137	36.3653	43.2869	31.8303	34.133	29.2603	26.2587	58.5991	32.7651
27.151	34.1298	33.3262	35.9256	27.3703	30.6151	43.6127	40.7341	25.6714	27.2612	38.3542	39.4538	36.388	26.3545	36.0077	43.0113	32.3179	33.7007	30.453	26.6082	58.7773	31.8388
25.8321	34.0736	32.8276	37.1187	26.5892	30.2877	42.9773	40.1439	24.0959	27.7113	39.8532	35.5104	36.2009	26.6634	37.7769	43.1516	31.4786	33.0165	31.2106	26.8349	51.7672	32.4593
25.7252	33.8116	31.8763	37.6572	26.5075	30.4309	44.1381	41.203	25.6679	27.2998	39.4759	36.0764	35.5334	26.3633	38.0675	35.6909	33.43	33.7616	29.1598	26.932	44.652	32.3499
29.784	33.2755	32.9031	39.1991	27.0398	30.0531	40.6559	39.5949	23.8979	25.4045	37.8908	35.3685	33.0783	25.4569	36.9815	37.0243	31.9412	33.7574	29.2404	26.4661	44.8929	32.5541
25.9809	33.1052	32.5524	36.9975	26.3815	30.0085	41.1802	41.3919	25.5464	24.1105	37.2487	34.3056	32.099	26.2508	37.483	41.8585	34.0625	33.5099	29.7264	26.1791	44.1337	33.5574
29.3125	33.5379	31.8266	39.2598	26.5829	30.6082	40.8608	40.7232	25.9325	23.0713	38.5232	34.8312	32.4967	26.0815	40.4848	42.1907	34.4655	33.9524	28.9114	25.6062	45.4423	32.1204
27.7718	33.3841	32.1029	40.9713	26.2228	29.9923	41.3262	41.5898	23.6594	22.3807	37.7108	33.9676	33.6023	25.9449	36.1625	41.4835	35.1683	34.6496	28.4653	26.6921	44.8975	31.5359
25.6361	33.2073	31.2135	35.7911	26.6036	31.1826	41.4711	38.5742	25.3578	23.3292	36.3305	34.3659	33.7762	25.4267	40.579	38.9398	35.9202	36.0665	28.1988	26.7544	45.183	32.2471
26.8885	32.7363	31.9889	40.9747	27.2477	30.5919	40.4458	39.379	24.2534	23.4953	38.2435	34.861	34.203	25.3713	46.0884	42.0124	36.1644	35.3253	28.2241	26.287	45.1155	32.8504
27.4522	33.9366	31.3066	40.8537	27.9658	29.9256	41.5596	40.0147	24.7559	22.437	39.1606	35.2211	36.0113	26.1405	37.8973	42.1034	36.7034	32.4887	28.6819	26.4314	47.4712	32.512
	33.457	31.2312	37.8491	27.1451	30.6567	40.3477	39.3604	24.8131	22.5116	37.4141	35.2638	34.5994	26.2924	37.1973	42.1467	31.6719	33.3055	28.0109	26.1292	53.8115	32.7247
	33.3031	33.0041	36.7605	26.5458	30.4906	40.4061	40.473	24.814	21.6247	37.0913	34.0662	34.3899	26.4008	37.2812	42.766	31.7584	33.9498	28.6381	26.2318	57.0753	32.917
	33.5969	32.1648	35.8239	26.7176	30.2499	39.2434	39.454	23.9941	21.3251	36.8845	34.1581	34.3072	26.1495	36.0545	45.5652	31.3329	33.2076	28.113	26.5906	55.6809	33.5035
	33.8086	31.1676	36.0113	26.4174	30.2658	39.2329	39.8832	24.1006	21.8292	38.2136	34.5479	33.2001	26.3287	37.4767	42.7052	31.0783	33.2944	27.1562	26.1939	55.624	32.4087
	34.0977	32.0791	36.1753	26.6571	29.8599	40.9522	40.7786	25.111	21.4706	37.7874	33.9386	34.2828	26.7974	37.8896	42.5658	31.5459	32.3027	27.3395	26.1502	56.8404	32.4605
	33.6902	31.6653	35.3578	26.3641	30.6431	43.1348	40.6433	24.6678	23.2984	37.9703	34.5944	34.933	26.7912	37.5868	42.9379	31.3905	32.7787	26.6564	26.0251	56.3256	33.4681
	32.7931	31.103	35.3242	26.5568	31.4172	41.7768	40.2997	24.3111	22.0901	39.864	34.2083	36.2009	26.9688	37.9487	42.8877	28.4877	33.2685	25.2314	26.4298	58.9438	33.0012
	31.867	31.1252	36.4867	26.7709	30.7065	38.753	39.8963	25.2821	21.5192	36.4371	34.8116	35.6538	26.1	37.899	42.5001	27.6697	34.595	25.5577	26.165	59.0538	33.2239
	32.9962	31.6343	34.7691	27.6977	30.6918	38.4175	40.1124	23.8428	20.1206	37.2981	34.1601	34.9511	26.8195	37.5786	42.1468	29.2551	35.9043	25.4801	25.521	59.0108	33.5933
	33.3241	31.8438	34.1984	27.6197	30.5902	33.7071	40.6722	25.8636	22.3478	38.0866	34.8068	34.0226	26.3114	37.4854	39.3259	30.9184	37.6082	27.2723	26.7966	57.4989	33.4611
	33.6157	30.4207	34.4428	27.0505	30.5058		38.9131	25.5368	21.3228	39.1352	34.6577	33.9898	26.9114	37.6816	40.0228	34.7315	37.6983	27.6803	27.096	58.7552	33.4428
	32.9617	31.642	34.7625	26.8389	31.4616		40.5318	25.8303	20.8402	36.9828	38.3389	32.7936	26.8346	36.1356	38.7693	33.8481	34.7586	26.802	26.5959	58.4741	33.9338
	33.3102	31.472	34.782	26.2045	30.4719		39.7919	25.1917	22.2089	37.1678	36.0318	31.8547	26.8917	37.9988	42.4188	33.9723	34.005	27.4979	26.5379	56.2535	33.6431
	33.0989	31.569	35.6879	26.4638	29.6529		40.3445	26.0446	26.6686	36.2171	34.6228	32.0467	26.7624	37.7218	41.7812	34.0934	32.1761	27.2576	26.4947	57.2918	33.8644
	33.7661	31.6839	34.5495	27.5562	30.3665		40.9935	26.8437	27.591	38.4333	35.0593	32.9817	26.7511	36.1279	41.5058	34.6569	31.6819	27.3791	26.6884	57.896	33.6319
	33.1337	32.5846	35.1832	26.1393	30.7717		38.9856	26.0588	27.23	37.2971	35.477	33.6742	26.7371	36.3127	41.9108	33.8841	32.305	26.8574	26.2613	56.1805	34.0344
	33.3453	32.2905	34.8272	27.2244	31.0464		39.9849	24.5773	27.1637	36.9383	35.1757	36.0907	26.8221	37.191	42.0894	33.7227	32.5895	27.3697	26.2744	56.1373	33.9286
	32.9527	31.6487	34.9637	26.5984	30.7043		40.013	24.6888	27.2654	38.095	34.9485	36.8553	27.4396	38.8955	42.2328	29.5964	32.8475	27.5639	26.7445	58.9716	32.9631
	32.991	36.5183	34.5565	26.8657	30.6911		39.0558	26.4874	27.1449	37.6087	34.8953	36.8385	26.7772	39.0786	43.2826	30.6012	33.1031	27.309	26.4825	61	32.6908
	33.2421	34.9066	34.8951	27.3825	30.1898		38.0685	24.5543	24.8038	37.3615	34.4124	34.1322	26.89	37.3123	41.2634	32.5208	31.9158	26.7647	26.3501	60.9487	33.4372
	33.3482	34.1134	35.3686	27.1668	30.5933		40.9944	24.6225	22.2768	39.9058	34.711	33.9727	26.9739	37.7143	44.1002	33.0383	32.6198	28.2323	26.4589	58.8878	32.7836
	33.9447	34.5304	35.3784	26.6834	30.3345		39.7937	25.7123	21.1699	37.0949	34.6473	33.111	27.4795	36.6476	42.7051	34.0105	32.8814	27.9492	26.3085	62.3201	33.7742
	32.3795	34.2068	34.7228	27.5744	29.8531		40.2952	23.8457	21.2633	34.9604	34.8564	34.7789	27.0324	36.366	41.2363	31.8985	32.8028	27.9852	26.0946	61.0081	32.9101
	33.8906	36.3004	35.011	26.4275	30.6871		43.3355	25.2832	22.3511	35.5946	34.3922	35.9651	27.5989	36.843	41.7932	33.2395	32.2719	27.8047	26.7652	60.1208	33.9191
	33.1314	31.7098	35.6428	26.8771	30.3281		40.6253	25.0287	22.0482	36.4597	34.2211	36.1851	27.4409	37.7091	42.0478	31.9414	32.7893	26.9791	26.9408	61.7709	33.1588
	33.5428	32.8622	35.5468	26.5839	30.2795		39.6261	25.3012	24.1197	36.3948	34.4741	35.3571	27.0612	37.6056	41.6306	32.244	31.8054	28.201	26.3037	59.4527	32.5155
	33.4256	31.7331	35.2315	27.3794	30.1639		39.1788	26.4341	23.2053	35.1691	34.8968	33.1126	27.2071	36.9448	42.1726	32.0977	31.3767	27.5659	26.6235	58.8263	33.6637
	33.963	31.5007	34.6408	26.6478	31.1507		40.8804	25.2814	21.994	36.243	35.4413	33.4349	27.4676	37.5506	41.132	31.5969	31.6146	27.02	26.5574	60.9472	32.9427
	33.8826	29.5003	35.0434	26.8701	30.615		39.3371	24.5024	21.3962	37.4103	35.5463	32.7155	28.9446	36.5047	39.3858	31.976	31.2514	26.7589	25.859	59.0852	33.0214
	34.1739	32.3076	35.1945	27.1197	30.9779		41.2785	25.0368	21.1846	37.1548	35.5833	32.0706	28.704	36.7804	37.8778	32.2953	32.4439	26.0689	26.3774	46.5258	33.8308
	32.5341	30.0306	35.5483	27.1597	30.6855		40.1929	25.112	22.2467	36.9299	36.0828	33.0303	27.6154	39.0397	42.437	32.0906	32.5906	26.4618	27.0022	45.6277	33.5003
	33.0862	32.5479	35.2566	27.8339	30.348		39.3864	25.6269	23.0885	36.3219	36.8029	33.8332	27.2171	35.5909	40.2599	30.6551	32.1432	26.4482	26.842	54.9318	33.0966
	32.7543	31.892	35.389	27.0261	30.3807		40.8357	24.4593	23.4472	37.0063	39.2669	33.7782	28.4189	36.8046	40.323	29.654	31.7978	25.9629	26.2796	60.1202	31.9061
	32.9901	33.2181	34.6879	26.99	29.9362		40.7944	23.695	20.579	36.9924	34.9215	35.2299	26.8713	37.1779	42.3764	29.4315	30.9497	25.9111	26.5181	56.9197	32.5503
	33.5169	32.4835	35.1964	26.731	30.9613		40.6278	24.3195	20.1114	37.3124	35.9262	35.4846	27.4545	37.267	39.7524	30.1878	31.6065	26.452	26.4718	59.9001	33.453
	33.8456	32.7397	35.8001	26.11	30.3898		39.9051	23.5101	21.2747	36.8645	35.3491	34.6129	27.4749	35.9094	40.6985	31.1241	32.5081	26.0022	26.7576	56.7562	34.7514
	33.7549	32.2448	34.7284	26.6988	30.8803		39.8171	23.8528	21.7606	35.8374	35.7913	34.7895	26.8894	35.9001	42.6966	31.9305	32.5387	25.6734	27.1074	58.925	34.3662
	32.5273	32.8955	34.9346	27.1271	29.4823		40.8784	25.8199	25.1352	37.3194	37.1409	34.1597	26.9294	37.9313	44.1533	31.4357	34.098	25.6765	27.0391	57.9568	34.1844
	32.6767	33.3678	32.511	26.5168	30.5746		40.8256	24.0239	27.386	38.6417	34.5854	33.6607	26.8407	38.6858	42.5125	32.2493	32.4717	27.013	26.676	60.025	33.4447
	33.4042	33.7562	33.3481	26.6902	31.5407		40.4491	25.2711	26.9815	37.6526	33.8984	36.4102	26.6739	36.6838	40.3236	33.3205	34.7265	27.0281	26.4548	59.146	33.4237
	33.4271	33.0941	33.6576	26.7581	30.6003		41.1857	23.6273	27.0343	37.554	34.804	36.2006	26.5067	36.9108	42.0066	32.4645	36.4356	27.0391	26.7291	56.9818	32.9922
	33.6105	33.1363	34.1415	26.2335	29.971		40.8649	23.3668	27.1477	37.7629	34.4319	37.334	26.4529	36.8164	42.416	31.0103	38.1255	26.2988	27.3065	47.3875	32.7556
	33.0889	34.3344	34.2136	27.2893	30.0478		40.1641	24.2592	26.801	38.9503	34.6613	36.1281	26.449	36.9494	41.956	31.4924	38.0592	25.8797	27.7868	46.4181	33.4881
	33.9404	34.6174	33.7683	27.4805	31.1296		39.4819	23.2253	26.9714	39.801	34.6575	36.0279	27.006	37.0142	41.5427	32.7939	38.6423	25.7209	27.3623	44.5745	32.395
	33.3719	36.4267	33.3962	26.9307	30.2041		39.9065	23.9456	27.571	39.3391	34.3356	34.2252	26.6546	35.8033	43.5775	32.053	38.2378	25.5068	27.1841	55.2323	34.1574
	33.7413	35.7011	32.6616	26.7307	31.0318		39.8557	23.5113	25.2221	40.3899	35.2388	34.0719	26.1836	36.2424	43.2067	31.8109	37.1264	26.1977		56.6046	33.4379
	33.9503	34.5937	32.727	26.492	30.4626		39.8571	23.3363		40.5916	34.3417	35.902	26.385	39.1182	41.2268	31.4476	35.5566	26.7415		58.7097	33.5652
	33.6311	34.1237	35.1979	26.7442	30.4986		40.6395	24.297		40.0715	35.0145	34.4101	25.8959	38.3047	42.2639	33.4803	37.7579	26.5732		56.2994	33.1501
	33.6506	33.7718	36.6479	26.6348	29.444		39.465	22.2435		39.8591	35.5002	35.1124	25.8868	36.164	42.2497	33.1467	39.5084	26.6742		56.927	33.0383
	33.7562	32.8042	36.2538	27.3458	30.2932		38.7064	24.5343		38.2837	34.5942	35.466	26.0773	38.7314	41.703	32.8285	34.4358	26.2355		54.9004	32.115
	34.1833	33.9452	36.1541	26.801	30.5867		37.6336	26.121		39.1078	35.4613	35.4824	25.9761	38.5507	43.3726	32.3661	33.8969	26.6928		55.8308	33.4385
	33.1675	34.2813	36.5566	26.4613	30.9998		39.7749	24.0208		38.5062	34.5086	35.7431	26.2227	37.8709	41.8656	32.8682	35.2713	26.9637		48.2781	33.1923
	33.1267	32.8903	36.1183	26.4611	30.0923		39.4529	26.2622		38.313	37.8544	33.6565	26.1159	37.1105	42.3473	34.1524	32.4087	27.148		46.7485	33.3758
	34.3396	33.6481	35.6197	27.6712	30.9621		38.9988	26.091		39.0756	34.8907	33.0559	26.2183	36.7584	41.484	32.5579	32.4169	27.4027		45.6551	33.9452
	34.04	33.9733	36.4852	26.6798	30.4644		38.3435	26.4063		38.3579	35.5972	36.3907	25.6911	33.2754	41.5717	33.6054	32.9968	27.9043		45.2874	33.6262
	33.8064	31.3612	36.5779	26.8165	30.0895		39.9318	27.2307		36.5406	35.4904	35.5924	25.6318	39.0203	42.0921	32.3826	32.4601	28.0783		45.3513	33.2037
	32.9721	31.9201	36.1951	26.7164	29.2227		40.184	24.8277		37.6592	35.6453	36.4376	26.0192	39.1403	40.292	30.8987	33.1848	27.9521		45.3806	33.2452
	32.7619	31.199	36.9995	27.1803	29.624		39.5419	25.5558		38.0705	35.509	34.3954	25.919	38.1151	37.3565	31.0407	31.9512	28.9788		56.163	33.7956
	33.2405	32.1677	36.5764	26.8504	29.7337		37.8119	26.2412		38.4663	35.783	35.2644	26.0451	38.4247	40.5617	31.8179	31.1378	29.0111		62.3438	33.356
	33.7239	31.7095	36.9782	26.5676	31.7688		37.8483	25.5145		38.1949	35.3149	33.6729	25.9466	38.0802	40.9954	33.0939	32.7154	29.9953		58.8424	33.1427
	33.5105	30.8596	35.4009	26.5305	30.7845		38.3706	23.8754		38.5686	34.709	33.8177	25.8151	38.4197	42.8066	32.7681	31.6816	28.9075		59.2023	31.9116
	33.7317	31.4493	32.8837	28.4824	29.6809		37.6994	24.0035		39.3494	34.7541	35.5621	25.9928	37.9036	39.846	32.9458	32.5082	28.8815		61.4184	32.2172
	33.7569	31.4604	32.7331	27.9062	29.6644		38.4671	24.7759		39.6697	34.7446	37.3944	25.7073	37.9557	39.6581	33.389	32.6238	28.7531		58.5976	32.8315
	33.9494	31.8485	31.7042	26.8408	29.6307		37.6382	23.6794		37.2966	34.5329	35.6304	25.4899	38.1065	42.4188	31.6502	32.9098	28.5835		62.8797	32.6223
	33.9056	31.4984	32.2125	27.9537	29.2858		39.6066	24.0956		35.9081	34.5384	33.9077	25.767	37.6872	40.4955	30.8537	31.1426	28.2807		62.1014	33.2892
	33.271	31.7281	32.2065	26.4076	29.0387		35.7756	24.7757		35.7729	35.0385	35.821	26.0537	36.5378	40.4951	31.3938	31.2832	28.4237		61.8761	33.609
	33.2438	31.9216	36.4767	27.4622	29.7717		35.5666	24.4598		36.7815	34.4017	34.0713	26.0979	37.1585	40.1379	32.2445	32.1644	27.7213		60.1925	33.0099
	33.6644	32.1153	35.6101	27.5174	29.194		35.5327	24.7387		37.2279	35.5615	33.1583	26.1103	36.8076	43.0262	31.5713	34.6945	27.3498		61.1655	33.2414
	33.4695	33.0219	36.3581	26.3224	30.8354		33.8929	23.7686		38.2431	35.243	33.3084	26.2582	37.3575	42.8486	31.9896	35.2693	26.9659		60.5819	34.34
	34.1964	32.5277	35.7267	26.8774	29.5427		36.0966	23.5807		37.7405	35.8626	35.2336	25.8062	38.0528	42.2913	30.6489	33.9818	26.5587		50.1205	34.1985
	32.5149	32.5031	36.6226	26.6514	30.2484			25.2569		37.6829	36.2791	37.4501	25.5198	38.0453	41.1983	31.2449	33.4143	27.4897		44.7561	32.8807
	33.5892	32.4905	37.2143	26.4211	30.0861			23.9436		37.5444	38.0709	35.2414	26.0914	37.474	42.1835	33.0392	33.83	26.7857		45.4663	33.4276
	33.395	31.4473	37.3907	28.2486	29.0162			26.4009		36.5103	35.8112	35.6941	26.0532	38.5749	41.9417	32.5904	35.5313	26.8868		44.6006	34.7125
	32.9771	31.5437	36.9514	28.8656	29.6956			24.574		37.4549	35.2855	32.8945	26.2876	37.4028	39.7576	31.3803	36.3085	26.3988		46.4277	33.2051
	33.0494	31.9472	37.2226	26.7424	30.0712			22.9807		36.1942	35.0335	33.9311	26.3037	40.3322	39.1053	31.7513	37.4837	26.631		45.3827	34.0856
	33.4511	31.8487	38.2852	26.7309	29.4943			24.2069		36.5129	34.6674	34.3852	26.292	39.1934	42.6047	32.4967	38.3062	26.7446		47.4547	32.6814
	33.2168	32.3022	37.7967	27.4275	29.0456			23.6038		37.7169	34.5545	35.06	25.9467	32.5109	42.1801	31.1956	37.2187	27.1324		51.6587	32.627
	33.2727	31.3448	38.479	28.3835	30.869			23.3465		36.4488	34.4272	36.2169	26.4506	35.9777	41.8168	32.222	38.7224	26.5465		55.8652	32.0926
	33.3806	31.7444	37.7883	26.5874	30.2231			24.5063		36.5774	34.6413	36.3334	26.1722	35.5418	43.551	32.2542	37.1307	25.6371		59.0982	32.5436
	33.922	32.1094	37.6992	27.0291	29.2338			23.702		37.6448	34.0237	36.1215	26.4577	38.3995	40.2527	32.3145	36.7866	26.9039		58.6949	33.0835
	34.0379	32.0612	37.7547	26.6977	30.0738			24.5344		37.4104	34.5754	33.0455	26.0893	35.9835	37.136	31.9142	40.4017	26.8085		59.9174	33.5608
	33.2659	31.7356	38.2079	26.5681	30.0442			26.8552		36.6988	35.0115	35.7003	26.2525	37.77	41.3493	30.5215	38.939	26.8411		57.9229	32.501
	33.1252	32.0842	39.5209	28.5629	30.0602			24.5334		37.9672	34.6809	37.1749	26.1721	36.6754	41.8332	31.7628	38.025	28.0717		58.9533	31.8756
	33.2447	32.7457	37.278	26.7546	29.6354			23.9219		37.787	34.7705	37.2201	26.3025	36.9747	40.0547	31.0885	37.4262	26.3158		59.6833	32.9167
	33.2951	31.9604	36.4422	27.9999	28.8531			23.8032		38.1078	35.0088	36.631	26.3886	37.6394	44.7899	31.7829	37.8577	25.7198		60.6156	33.4515
	33.0458	32.2063	36.581	26.6596	30.3547			24.3493		38.4036	35.1832	35.1184	25.7327	39.8313	39.3061	30.7869	35.1396	27.1145		60.3008	32.7831
	33.0107	36.075	36.7719	27.0753	31.743			23.9548		40.3713	36.2546	34.2916	26.1169	36.9998	39.3062	30.7228	33.012	26.171		58.942	32.3102
	32.8532	36.1794	36.5468	26.3867	30.48			26.1788		39.1689	35.9832	34.4952	26.2844	36.7384	39.8853	30.6073	33.8925	26.3148		62.0425	32.4394
	33.3513	35.6067	37.3122	26.746	29.3135			24.2122		40.7158	36.3423	34.392	26.1681	36.0568	39.6737	32.9393	32.7873	26.2696		59.6162	33.9434
	33.2606	35.987	37.0823	26.3148	29.1273			22.9276		40.9175	37.2166	36.1754	26.0925	36.1704	39.0588	32.3115	32.6518	27.2665		57.7489	32.9041
	32.9645	34.8339	36.4847	27.7391	30.7602			24.231		41.0693	36.3617	35.1255	25.2493	35.9787	40.1111	30.5444	32.1763	26.3389		57.9176	32.6831
	33.6372	34.9746	37.3382	27.2216	30.0847			23.6135		41.3981	34.4579	36.6259	26.3297	37.1013	39.5217	31.1557	31.1139	26.2063		56.4962	32.7812
	33.3295	34.2536	37.5714	26.4522	29.4794			23.5479		39.4573	34.6212	35.9436	25.8848	35.8299	39.7477	32.1345	31.9821	25.2619		58.0067	32.8815
	33.3167	32.4799	37.3619	26.398	29.7466			24.9457		38.7889	34.7383	33.5266	26.1937	37.6927	41.7074	31.718	30.9563	25.302		59.0189	33.3445
	32.9839	31.1482	38.7252	26.3105	29.5753			23.198		39.2382	34.3442	36.1466	26.172	36.1896	41.9613	31.4777	29.5329	24.769		59.8707	32.8968
	33.0885	29.3739	38.6434	27.6671	29.9342			23.7773		38.8299	34.3598	35.2973	26.0899	37.5461	42.8078	32.318	32.0091	24.326		57.4941	32.7128
	33.2933	32.2494	37.0582	26.8162	29.8457			25.6757		37.6496	34.1502	35.9435	26.4921	37.5591	41.6202	33.4437	32.1197	25.3534		58.2929	32.8169
	33.4253	33.4444	37.1989	27.1103	28.9956			24.5898		38.9914	33.6804		26.4102	36.9589	38.6402	31.7739	31.9014	27.2103		59.4863	32.7949
	33.4889	34.2028	35.8313	26.8209	29.1435			23.5631		36.4499	33.8076		25.8649	36.7111	39.3085	31.8086	31.9962	27.8847		58.4111	33.0677
	33.5427	33.7961	35.7486	27.7627	29.1235			24.4225		38.7974	33.8388		26.2501	35.7538	38.9458	32.7014	30.969	25.7674		46.8079	32.4275
	32.5407	34.0998	34.9265	27.1705	29.5706			24.6771		37.9985	33.9417		26.6026	35.8469	39.3793	32.7802	30.8093	26.9449		45.5357	32.7195
	34.2136	32.8372	35.6777	27.2398	29.6614			25.6474		37.1041	34.9215		27.0337	36.5794	39.5776	32.4283	30.2938	26.3475		45.3564	32.2688
	32.5176	32.6387	35.2401	26.6784	30.1959			24.1438		37.073	34.9192		26.5607	37.7857	41.2728	32.5118	32.6395	25.5442		44.3815	33.2632
	33.4205	32.3157	35.689	26.7413	29.6354			23.8154		35.8047	34.8621		26.2851	36.1733	40.5129	34.0459	31.8452	25.7709		51.0391	33.092
	33.419	32.7271	35.8255	27.4713	30.1175			23.2841		36.7173	35.8679		26.2516	37.2614	41.8845	32.5758	32.2302	26.2835		58.9194	32.9047
	32.7465	32.8149	34.7118	26.9073	30.4877			23.8766		36.1821	34.9747		26.3076	36.4056	41.968	33.7841	32.7922	25.0709		57.3312	32.7463
	33.42	32.7871	34.1854	26.8523	31.2118			23.2432		35.7345	34.971		26.3107	35.1956	42.8146	33.914	34.7307	24.4503		57.7573	32.4533
	33.7016	35.1415	32.8939	26.4218	29.2848			25.3602		36.1407	36.9635		26.5502	35.8915	43.8964	31.9264	33.1128	27.8536		58.6557	31.879
	34.0053	33.5323	35.8313	27.8007	29.8246			24.717		36.8973	36.4755		26.3832	35.504	42.1408	31.4153	33.9821	27.684		61.4979	32.7511
	32.8972	32.7468		26.7803	30.0721			27.895		35.7345	36.2127		26.227	36.5005	42.022	30.2292	35.2577	27.1211		57.5618	32.0994
	32.6662	33.38		26.3038	29.4693			25.6178		37.2385	35.6835		26.5457	36.084	42.108	31.1521	37.0451	28.8523		59.1663	32.8314
	33.4131	32.6804		26.8731	30.3669			24.9396		37.0036	35.3371		26.9436	35.8918	43.0183	31.4902	35.1487	27.7281		59.3843	33.6104
	33.2429	32.0279		27.0133	29.9779			22.9024		36.3768	34.6272		26.6136	35.9173	41.6163	32.0498	36.2745	27.0421		57.7428	33.7011
	33.6793	33.0513		27.0392	30.0969			23.8966		35.8227	34.8454		26.7193	36.9007	40.9583	31.8373	39.0403	27.6979		62.0104	32.8806
	34.8515	33.2879		26.91	30.8261			24.4441		36.8771	35.4434		26.3619	36.8697	42.6326	31.5518	37.6757	26.3787		60.3274	32.971
	35.2411	32.8646		26.6279	31.0186			28.0109		37.2495	34.6419		25.8528	35.7181	40.7389	33.0498	37.8262	25.8541		61.2336	32.384
	32.3799	32.6773		26.5925	29.6476			24.408		36.7889	34.6923		26.7891	35.7809	39.2608	32.6403	37.2739	26.4906		61.3099	32.7449
	33.6034	33.3404		26.5222	30.0453			24.5846		38.0438	35.689		26.7378	35.862	43.8321	32.7176	37.3661	27.2583		61.2873	32.6235
	33.1119	33.574		26.8779	30.2975			25.4691		39.3922	35.4133		26.6203	36.5512	44.1627	32.4018	37.8392	25.0068		59.868	32.7294
	33.1234	33.2045		26.5278	29.8295			24.883		37.4671	34.1093		27.3342	36.4758	42.4062	33.1582	35.3081	26.4995		55.4417	33.5238
	33.4729	32.0636		26.4721	30.2901			25.5041		39.2405	34.2902		27.2222	36.1894	43.1156	31.3584	33.9596	26.3181		60.6412	33.1729
	33.4024	32.9253		26.7162	30.9644			26.1254		38.4711	35.3122		26.7285	35.6453	42.8134	31.4977	33.3629	26.2776		61.9334	33.3849
	32.7452	33.8218		27.8391	29.0644			25.2837		37.2093	36.2353		27.199	35.8905	42.6182	29.6705	32.098	27.8962		60.5407	34.1657
	33.2342	33.1591		26.7792	30.6535			24.2909		38.033	36.0713		27.0121	35.9039	42.4426	29.1898	33.3439	28.3701		58.3546	33.6208
	33.0378	32.9077		27.0446	30.3761			24.8106		36.4555	35.6003		27.3942	36.1714	38.8164	31.1149	32.4492	26.5471		59.803	32.871
	33.3623	33.0228		26.7746	29.5027			25.3647		38.1643	39.6104		27.8147	36.2984	39.9702	30.8932	32.4617	26.0585		53.7677	33.4043
	33.9367	31.6621		26.6018	30.1532			25.1356		37.3507	35.3686		28.2563	35.9279	39.9474	30.9529	31.3307	26.8177		47.0148	32.748
	33.7153	31.8471		26.5217	29.9119			25.2971		38.0759	35.6531		26.97	37.1606	40.0457	32.06	30.9162	26.4058			32.0762
	33.3503	32.7861		26.2012	31.1525			25.198		36.8845	35.6441		27.5001	36.4769	43.2637	32.852	30.8566	25.1671			31.9041
	32.6654	31.1682		26.6321	30.9535			26.1723		37.2815	34.4562		26.8545	36.5267	43.1809	31.6939	31.4294	27.1511			33.0246
	32.4912	32.0418		27.0747	29.7976			26.7335		36.8739	34.3823		24.3751	36.5787	44.2368	31.3167	32.3859	26.3108			32.1547
	33.398	31.3672		26.6779	29.0983			27.112		37.2134	34.8136		29.1488	36.9648	43.028	31.5687	33.6848	26.783			32.1406
	33.1939	32.2677		27.1484	29.717			25.5516		38.2048	34.9964		29.1699	37.0941	42.743	30.7592	34.7428	25.5765			32.1899
	33.2402	30.3053		26.7144	30.3613			30.9231		38.224	34.1862		29.628	37.1972	41.7643	30.2415	35.8552	25.3236			32.2305
	33.6537	30.8404		26.6979	30.736			24.7976		38.5565	34.552		28.8746	36.8128	42.2032	31.5856	38.7936	25.2738			31.8765
	33.3572	31.9238		26.5289	29.5199			25.6511		38.7427	34.8283		26.5503	38.501	40.4029	31.4997	33.178	26.9792			32.3247
	33.9078	33.1534		26.7819	30.8008			24.5309		37.7551	35.7409		26.1626	37.561	41.8782	30.7631	32.5128	25.9103			32.0602
	33.5663	32.6302		27.0133	30.6601			25.9921		39.4735	35.5078		26.8291	36.1752	42.5125	31.7441	31.4868	26.2721			31.5615
	33.6923	32.0415		27.6533	30.3167			24.3173		39.5221	35.9732		26.3683	36.8806	41.369	31.7672	31.6997	26.1906			32.5518
	33.0552	31.9203		27.1867	30.1765			23.1031		39.5322	35.4869		27.2168	36.8397	41.9936	31.4766	31.92	25.6389			32.8284
	33.8156	32.2286		27.4137	29.9532			25.2046		38.7151	36.5518		26.4599	36.6047	40.619	32.0487	33.3148	25.7637			31.5447
	33.3503	32.0471		27.6289	30.7484			28.0819		38.1009	37.5296		26.665	37.6515	40.6582	32.8798	31.2537	26.682			32.4569
	32.9693	31.8528		26.7061	30.7077			27.9028		37.4897	36.5477		25.9388	38.0398	40.3615	30.6532	31.0778	26.0594			32.5111
	33.9333	32.4222		27.3511	29.9742			26.1162		37.9207	37.0124		26.0157	36.5994	38.2016	30.9097	32.7707	25.5041			33.3082
	33.9157	30.9992		27.0989	30.5731			24.4267		38.9835	36.2881		26.1441	37.288	41.0115	30.4799	33.1917	24.9636			32.4985
	33.5854	31.3577		27.5075	30.7863			24.6439		41.067	34.8728		26.0851	36.8973	42.2264	28.3869	34.3256	25.5864			32.4989
	33.0183	31.8722		27.5868	30.1146			24.772		40.7488	35.2923		26.1666	36.8052	41.3914	28.1787	33.4854	26.091			32.3078
	32.8445	32.0131		27.7896	29.1573			25.1004		41.3669	34.8937		26.3009	35.7772	42.0206	31.6868	36.9785	25.3688			32.3442
	33.3032	32.9329		26.7748	30.5046			24.7652		42.7978	34.4561		25.935	37.2864	39.6507	32.895	35.315	25.9449			32.067
	32.613	32.9187		26.8098	30.1654			26.349		41.4924	34.4086		26.0038	36.332	41.5086	34.0484	34.1364	25.6275			32.4445
	33.5609	33.2437		26.8805	30.5783			26.1445		38.7822	35.1094		25.6833	36.1693	40.2441	32.6272	31.9611	25.9675			32.8513
	34.0358	33.8633		27.6115	30.0495			24.3431		37.9026	32.7493		25.838	36.506	39.1343	32.0149	31.815	25.4242			31.7831
	33.8814	34.9113		27.1408	30.185			24.2397		40.1939	35.2576		25.9458	36.1684	40.7277	34.28	33.1893	26.0097			32.2474
	33.8877	33.4637		26.5576	29.512			26.5776		39.0434	34.6888		26.0469	36.6734	40.777	33.0744	33.0569	26.222			32.3647
	33.0837	34.7564		26.7898	30.4449			27.0434		40.4652	34.4681		25.8952	36.408	41.0475	34.054	32.534	25.8537			33.2315
	33.3573	32.7122		27.3192	30.1386			24.8768		39.7999	35.2927		25.8604	35.9288	40.9492	31.9014	32.0619	26.9142			33.9509
	33.0338	33.2861		27.4743	29.7411			23.6582		39.7289	35.3558		26.4862	36.4852	40.6494	32.1978	33.0426	27.729			32.5227
	32.7465	33.9725		27.6055	29.3391			24.3914		39.7901	36.7211		26.2696	37.3745	41.1459	32.3648	32.5192	26.8963			32.6929
	33.1998	33.6115		27.8196	30.1369			25.3336		38.2594	38.4951		26.0128	37.579	40.1694	34.4119	32.2411	26.9505			32.9514
	33.9372	34.5097		27.2305	29.649			24.7152		39.1229	35.6706		25.5933	36.57	42.134	36.6763	33.2955	27.2349			32.93
	33.2132	33.9575		27.2806	29.9563			24.3534		37.1883	35.0224		25.9259	36.4464	41.3433	36.021	33.6414	26.9125			34.0643
	32.8512	33.5215		27.6925	29.6356			27.5317		37.5436	34.7947		26.0587	36.7576	42.2086	33.1714	33.532	28.0531			32.8893
	32.1506	33.3965		27.1928	30.1543			27.1782		37.5152	34.0515		25.727	37.2351	42.3789	33.0026	33.1645	29.3633			32.8851
	33.6087	31.6957		26.6214	29.5201			24.5016		38.2098	34.2035		25.8907	36.1052	40.6068	33.6734	32.512	29.065			32.0929
	33.2471	32.065		26.2662	30.4535			24.8755		38.0097	33.9429		25.7294	36.1891	42.1997	33.361	31.7971	27.735			32.3213
	33.3586	32.0105		27.1354	30.1352			24.5275		37.5963	34.0791		25.5352	37.2921	42.081	33.1193	32.6196	29.3235			33.0115
	33.7534	33.278		27.4933	30.1215			23.0553		38.5052	34.0504		26.7691	36.1378	42.2053	35.0335	32.8674	28.4115			32.0766
	34.5581	31.981		27.5643	30.2276			24.9661		36.8294	34.7718		25.7992	36.4562	42.7151	35.3995	33.5796	28.6834			31.8156
	33.3043	31.8374		27.1177	29.9405			23.6111		38.0398	34.308		26.1753	36.8235	40.2644	34.3145	32.7568	29.0401			32.8904
	34.018	31.2078		26.6166	29.506			24.1847		37.8852	33.7533		26.2271	36.8402	40.4799	33.9213	31.999	29.1728			31.8674
	34.7487	32.1018		27.1092	30.1854			24.8837		37.0974	34.9474		25.5833	36.0268	42.0686	32.8832	33.1578	28.6686			32.3331
	33.7215	32.1931		27.4273	29.9321			24.4138		35.8737	34.6578		25.8794	36.7652	40.1032	32.2459	32.1285	28.3205			32.4814
	33.3134	32.6562		26.9105	30.4336			27.3899		36.0249	34.8238		25.4692	37.7895	41.5128	30.6138	34.3636	28.8024			32.731
	33.3629	32.1788		27.6914	30.5412			26.8187		36.7283	36.5094		26.177	38.6454	40.7514	30.0321	36.1776	29.2397			33.413
	33.6705	32.5687		27.0559	29.863			28.1222		38.6473	39.406		25.7821	37.5965	41.962	30.1678	37.4777	28.4405			31.5957
	33.0959	33.005		26.927	30.1575			23.4082		37.9262	35.7092		25.8437	38.8029	41.2771	30.1544	37.4789	29.0747			32.3935
	33.1739	32.5708		27.0747	30.6723			25.5788		35.934	34.9345		25.869	37.9749	41.2864	29.5269	38.4053	29.4924			33.6442
	32.9898	32.5832		27.0437	31.1909			25.0148		37.8717	35.0831		26.0749	28.4144	42.7327	29.7167	38.3319	28.0802			32.872
	33.458	32.5997		26.9104	29.8157			24.2082		39.4266	35.2975		25.5896	37.1462	40.5702	30.1733	38.251	27.8032			32.9124
	33.2217	32.8764		26.6116	29.7295			23.7873		36.2929	35.0294		25.8275	37.131	39.9221	28.146	37.9323	27.1307			32.5761
	32.9816	32.3469		26.9267	29.4671			22.637		37.6366	34.7942		25.1443	36.2683	40.7292	30.4478	38.5384	26.4598			31.9758
	33.4061	31.4682		26.785	29.8925			24.4821		36.5197	34.6709		25.5664	37.6322	40.6348	28.5696	37.6416	25.735			32.8248
	33.0026	32.3451		26.5262	29.5999			24.9649		36.2795	34.2789		26.0022	37.2791	41.6146	28.1646	37.45	23.5207			33.8837
	33.5799	33.3444		27.0322	29.7703			25.7473		35.0856	35.2082		25.4338	36.999	41.0578	30.3951	37.8464	23.9252			33.532
	33.8253	31.4229		26.6391	30.0262			23.7332		37.3426	34.56		25.762	36.0403	41.6709	30.9323	39.2829	23.3461			32.3021
	33.8185	33.3238		27.2531	29.8917			24.1872		36.4704	35.1206		26.0521	36.6958	41.0391	31.2757	36.9982	23.774			32.3586
	33.4151	33.2133		27.4706	30.6602			24.9548		37.3198	34.687		25.7177	36.4373	40.9065	29.3507	36.9676	23.0219			32.1134
	31.9758	33.5023		27.3416	29.1781			25.3456		38.5491	35.4012		25.9586	36.529	43.0264	29.8787	30.4832	25.1756			32.3214
	31.9242	33.0165		26.5386	29.0065			24.0232		38.9148	36.1398		26.062	37.3023	40.9017	30.0244	32.9477	24.7936			31.8446
	33.2487	32.8977		26.9483	29.73			25.5268		37.3834	37.2102		26.139	35.9412	37.8943	31.3842	32.9653	24.6511			32.717
	33.3933	32.9861		26.9384	29.7698			24.9608		36.3229	35.0684		25.4221	37.029	39.8834	31.1986	32.5972	25.7515			33.1803
	33.8363	33.6116		26.3057	30.6534			24.9032		37.8608	35.4018		25.7977	36.1156	38.4831	31.3227	31.8135	26.4372			33.0882
	33.1012	33.309		27.1648	30.5091			26.8413		39.6738	35.7626		26.0183	36.9034	41.6963	32.0777	31.1184	27.18			33.7864
	33.4528	35.1719		27.4431	30.8758			24.1243		41.2626	34.7093		25.792	37.52	40.7173	31.1732	34.5183	26.7427			32.4744
	33.0926	35.2399		26.5251	30.6422			24.7259		40.8044	33.9917		25.2293	39.5829	43.1239	30.4192	33.8764	26.4394			34.1661
	32.874	34.9121		26.9484	30.1197			24.0314		40.4018	33.6975		26.4287	38.5953	39.5078	30.0618	33.461	25.6128			33.0631
	32.9939	33.9747		26.6256	30.1681			24.0178		39.7245	34.126		25.7896	37.1276	38.7439	29.287	32.7831	27.1568			32.7609
	33.1885	34.522		27.4833	30.8556			23.4987		38.277	34.2825		26.1834	39.7794	40.9413	29.7233	34.7111	25.7209			32.4439
	32.8909	34.9805		27.5531	30.1707			23.7943		37.7	33.7009		26.2731	37.6396	41.7088	31.6674	33.7445	25.3011			32.4231
	33.3146	28.8787		26.816	30.9635			24.7173		39.1107	34.7272		25.8972	38.2056	41.5582	31.7308	34.0908	26.7659			33.1474
	33.6088	32.5201		26.4	30.8229			23.5389		38.0432	35.1677		26.1296	37.3019	42.289	31.708	31.6085	26.9539			33.4247
	33.2694	32.7061		27.7924	30.3677			24.5304		38.182	35.2356		25.7619	38.5234	40.5479	32.444	32.0879	27.5833			33.4662
	32.7736	32.2784		27.3487	30.5881			24.1027		37.1465	34.7614		26.1003	37.5541	41.5778	31.7959	30.6861	27.4455			33.627
	33.0769	32.3007		27.5376	30.4183			23.7393		36.9338	36.0748		27.0163	38.9281	41.1216	32.9344	33.6975	27.2345			33.2324
	32.9282	31.9594		26.4816	30.1518			24.6916		37.077	38.3237		27.0376	38.2476	42.204	31.4448	33.7102	26.6176			32.9009
	33.8909	32.1895		27.601	29.92			22.2946		37.2018	35.6137		25.368	38.5078	41.607	31.4766	36.5294	26.8862			33.0832
	33.2616	31.7319		27.0276	29.5155			24.2231		36.5016	35.6642		26.5197	37.424	41.7405	32.4819	38.2041	26.5373			33.0526
	33.5614	31.8209		27.3296	29.7341			23.948		37.3421	35.6154		26.0252	38.1526	42.2893	32.2591	36.1234	26.0343			32.5359
	33.8486	31.7649		26.4897	28.985			22.9026		37.2743	35.8376		26.2097	37.6697	41.0324	31.8771	37.3681	26.6459			33.5715
	33.4366	32.4943		27.4176	29.4639			22.7094		37.721	34.4641		26.0678	38.5877	40.3902	31.8046	36.0141	26.7579			32.3051
	32.8982	33.3516		27.2372	29.9266			24.2689		37.4126	34.6411		26.4815	37.8535	41.3524	32.4458	32.9092	26.6407			33.1692
	33.4365	36.1742		26.2646	29.675			25.4793		36.6982	34.2487		26.4017	38.2047	40.0196	30.8803	32.4231	21.3572			31.9759
	33.319	36.6092		27.1753	30.0427			22.6121		39.6461	34.6896		25.9564	39.6887	41.6531	32.8647	31.9401	22.0271			32.7579
	33.4909	35.1122		27.0348	30.1292			24.3921		38.1805	34.4249		25.8136	39.0017	41.5463	32.5361	32.7882	23.1383			33.1944
	33.0326	32.4449		26.7141	30.2937			25.3599		37.6742	35.0088		26.095	37.6346	41.6863	32.4783	31.7799	24.061			33.1513
	33.0813	32.268		27.1085	31.0546			25.8194		38.963	34.3858		26.2663	38.4876	41.5552	32.4199	30.6918	26.1795			33.0383
	33.057	31.5011		27.1355	30.6235			23.7926		36.6904	35.4995		26.2324	37.8448	41.4031	32.2708	30.2399	25.3623			33.389
	33.1216	30.6002		27.6764	29.2405			24.4424		38.396	35.7178		25.629	37.7524	41.8155	30.1695	32.7923	25.1515			32.9459
	33.548	32.1909		27.2564	30.1257			25.807		37.5237	35.3812		26.2882	37.066	42.71	30.9868	34.1791	25.1852			33.9147
	33.391	29.5338		27.2613	29.7757			25.1826		37.4858	35.6554		26.4611	37.1576	41.5249	32.0266	32.9926	25.4374			33.0632
	33.1802	31.6093		27.1816	31.001			23.9408		40.2433	35.1485		27.1224	36.2744	42.5683	32.2934	34.4998	25.6604			32.689
	33.2599	32.3753		27.2752	30.4466			26.9342		37.5057	34.4322		27.4158	37.1844	40.6443	31.3898	33.2922	24.9291			32.9262
	33.587	31.9367		27.2247	29.9554			24.5887		36.965	36.2241		26.9817	38.6638	39.8991	31.7772	32.9196	25.6792			32.7416
	33.5254	32.8847		26.494	30.7247			24.7372		38.086	36.0664		25.9872	37.1976	39.8167	32.2245	32.3293	25.5682			32.6124
	33.867	31.8355		26.9049	30.2596			25.7166		38.8435	34.9282		26.916	30.6681	41.5769	31.5494	32.8022	26.1561			32.0483
	33.1849	32.6803		26.9383	30.365			25.5768		38.8777	34.7887		28.932	37.2545	42.6051	32.2252	32.9336	25.3126			32.1456
	33.661	32.2049		28.324	29.7819			25.2665		38.3691	34.8901		27.203	37.4588	40.7994	32.286	33.0477	25.5836			32.54
	34.1327	33.2793		27.1128	29.9593			25.3318		39.1665	36.0273		26.5029	38.7366	41.6865	32.2074	35.95	25.5392			33.357
	33.3559	33.2771		26.7241	30.5419			24.565		39.5191	35.6187		26.608	38.6999	42.1943	32.1748	39.5495	26.129			33.1362
	33.11	33.1395		26.5883	30.4096			25.0149		39.814	35.6244		26.911	37.0282	40.9144	31.8021	37.2997	26.1476			32.9967
	33.8518	32.8688		27.0729	30.0356			24.6086		41.051	34.2682		26.4438	37.7385	41.3172	30.493	35.7272	25.9674			32.9405
	33.5573	35.1388		27.0757	30.0003			24.7926		38.9627	35.5421		26.978	36.3975	39.2734	30.4259	35.8026	26.3332			32.8917
	34.0538	33.6291		27.0306	29.8655			23.9926		41.1402	36.1361		26.6032	37.5589	40.8428	30.5346	37.8301	26.5597			32.9869
	33.5497	33.9691		27.3272	30.5945			23.9452		39.9301	36.2126		26.6252	38.8669	41.8744	31.1386	38.5223	27.4126			33.6421
	33.4726	34.0153		27.1868	30.0141			28.006		40.6188	37.8283		26.3918	36.9823	42.7816	30.1413	37.4302	26.9398			33.6577
	33.481	34.9229		27.6187	29.7201			28.4266		38.9468	37.005		25.7348	36.1069	41.4498	31.092	36.494	27.2941			33.1096
	33.1146	35.1543		27.9218	29.7346			23.642		40.1432	36.7159		26.3636	41.3022	39.4448	30.5394	33.7727	27.3157			32.9648
	33.3584	36.2584		27.6314	30.3776			24.1932		38.4847	36.7024		26.0676	42.0915	37.841	31.4877	32.0123	28.0112			32.5078
	34.5159	36.4148		27.2831	30.2108			25.9959		39.1337	35.1268		25.9863	39.4877	37.9581	32.2204	32.9735	28.5315			32.4564
	33.2279	33.5728		27.7834	30.8113			23.9943		38.5956	35.8501		26.1819	37.1009	40.5366	31.5571	33.3662	27.7476			33.651
	32.7437	33.87		27.3068	29.7433			25.0694		37.3621	35.0251		25.8993	36.3078	41.5559	32.2223	32.5338	28.3084			32.8704
	33.404	35.0518		26.96	30.7298			25.1573		38.6832	34.6428		25.3698	37.9108	39.3927	30.5349	32.9974	26.6561			33.1208
	33.1797	33.9253		26.8071	29.7902			25.2409		41.0305	34.8037		25.8156	36.8554	43.0156	31.0166	33.9042	26.8567			32.0773
	33.0564	33.4847		26.4774	29.0671			25.0672		38.0119	35.611		25.658	37.1375	41.3119	31.583	35.6653	27.3272			32.7314
	32.6683	33.3546		27.4388	30.0078			22.9914		35.9466	35.3956		25.7895	36.3294	42.4466	32.6045	33.9636	27.5676			32.2043
	33.5497	33.3256		27.9464	29.8547			24.7819		36.651	34.5063		25.2939	37.1008	41.5571	33.6774	33.5668	27.4803			33.289
	33.4114	33.9666		27.2036	30.2949			24.0518		38.5724	35.7883		25.3729	37.3694	42.5675	32.889	33.1095	26.8892			32.6567
	32.9315	33.3821		26.7453	29.9854			24.2923		36.8957	36.1008		25.9229	35.9314	38.3946	34.014	34.8758	25.923			31.9022
	33.6796	33.553		26.758	29.2229			23.3183		37.7729	39.2682		25.5307	36.3474	40.861	33.5594	34.9865	24.9103			33.6257
	32.9331	32.6244		27.6022	30.4622			23.3283		36.6559	35.8224		25.9316	36.4976	42.3957	32.0576	34.5291	26.522			32.8295
	34.3009	34.4702		27.1892	30.7264			23.774		38.7576	36.1412		26.1221	36.3144	41.2771	32.7897	34.1372	26.3838			33.3742
	33.7616	32.738		27.4507	30.5937			24.82		39.3277	35.8814		26.221	37.4983	40.6409	33.5672	35.4514	26.6893			33.8117
	32.9331	33.2519		26.8502	30.7954			26.5976		37.7911	35.8093		25.7746	35.7092	38.7235	32.893	34.1068	25.7542			33.9778
	32.8759	32.5485		27.6225	30.2355			24.8137		38.0416	35.3662		25.6556	36.0421	40.8341	32.4454	33.5675	26.952			34.1839
	33.2323	33.1795		26.7462	30.7917			27.061		37.2041	35.2391		25.7498	35.6821	41.6406	33.2464	32.5634	27.6674			33.7708
	33.1738	31.6215		27.2444	31.2961			25.0925		37.2825	34.9089		25.859	37.4256	42.3923	31.9962	35.144	27.5548			33.1608
	33.9285	33.8362		27.4039	30.2196			24.6947		38.2195	34.0785		26.1339	37.2701	41.9931	33.2185	35.2661	25.8571			33.1006
	33.1255	32.452		26.6103	30.7324			23.7494		38.0877	35.8481		25.8411	36.3082	41.8877	32.6353	38.9247	27.3479			31.5578
	33.7356	32.357		26.6028	30.7333			24.8791		38.0788	35.4276		26.4193	36.5193	41.7563	32.0012	38.5297	27.1767			33.0199
	33.1471	32.7502		26.53	30.2432			24.1472		37.6654	36.3097		25.9935	36.7034	43.3074	31.4271	38.2057	27.1979			33.5569
	33.4035	32.3442		27.3722	30.8267			23.7369		36.6303	35.1872		25.7568	36.198	43.5049	32.1255	38.5779	27.2534			33.6814
	33.75	32.831		27.1414	30.986			23.2377		37.3338	36.2305		25.8591	37.3423	42.6145	33.172	32.7301	26.941			33.6505
	33.8252	32.9573		27.4451	30.452			23.914		37.1687	36.6582		25.7721	39.0921	44.764	31.3195	33.8965	27.0281			33.0467
	33.4911	32.7635		27.0085	30.758			25.0298		37.7749	38.9888		25.7134	37.6296	42.9113	31.1277	33.2552	26.9591			33.6016
	33.2669	31.7871		27.3997	30.9424			23.5886		39.3864	35.7931		25.9604	37.4138	42.6022	32.1249	35.1189	26.9197			32.8724
	33.089	32.6502		26.8834	30.2208			25.6091		43.6546	35.7016		26.1775	37.4436	40.756	31.792	33.4077	26.1394			33.5257
	32.6662	31.0558		27.2502	29.7846			24.7312		40.2683	36.1853		25.7278	37.1676	40.3975	30.7724	32.5733	25.9839			33.9448
	33.3531	31.7289		27.39	30.1511			23.4028		40.211	36.4617		25.5958	36.2739	39.4736	31.5168	33.7093	25.8647			33.8833
	33.3301	31.5751		27.2174	29.3017			23.2078		39.6748	35.8756		25.4607	36.6724	40.5962	31.6209	33.1364	26.7774			34.2327
	33.5259	32.8425		28.3387	30.4008			25.5255		38.9113	36.1642		26.2924	36.9367	37.6891	32.3804	35.0907	26.9808			33.3292
	33.3227	31.9942		27.3277	30.7426			23.8912		37.5836	35.8517		26.0334	36.9183	37.8707	33.1437	35.1556	26.8097			32.915
	32.7455	33.9677		27.3782	30.6517			24.6963		39.1691	35.8168		26.0524	37.5306	37.7711	31.5506	35.4383	26.6224			33.6301
	33.1946	32.882		28.0024	30.5319			24.3571		39.9351	35.5108		26.177	36.6999	41.2287	32.0014	36.4552	26.3886			33.4017
	33.005	33.275		26.9713	29.7066			24.6506		38.2273	37.6908		26.3697	37.0568	42.1809	31.3966	35.6549	26.3679			33.6132
	33.038	35.132		26.9303	30.0386			24.2423		36.9256	36.405		25.9866	35.8608	43.2227	31.1463	34.2373	26.9708			32.8614
	32.7474	34.3224		27.9956	29.9837			24.8917		36.6283	36.9319		26.0452	38.2347	39.2376	31.1074	35.1511	27.4666			33.6752
	33.0262	33.2414		26.6938	30.1179			24.3063		38.9199	36.8126		26.414	37.2022	38.429	31.881	36.852	27.2283			33.6605
	33.6516	32.0135		26.9679	29.7089			24.5699		37.9054	36.4057		26.368	36.7809	38.8917	31.5061	37.5826	26.6828			33.2979
	33.4389	31.9041		26.3762	30.5544			24.593		36.0707	35.7667		25.8498	37.6203	42.1739	30.9604	36.6274	25.1557			33.9481
	32.9565	32.1151		27.1602	30.8951			24.0355		36.4646	36.2449		26.2701	37.6875	40.6498	31.18	34.5011	26.6359			34.3817
	32.5723	32.2141		27.3437	30.5236			24.3031		36.851	36.2384		26.0087	39.5503	42.0289	31.7935	35.1102	26.6626			34.0178
	33.409	32.0444		27.654	29.4461			23.7128		36.284	35.7949		26.1772	37.4284	42.6112	31.3996	37.7442	25.6054			34.8482
	33.9633	32.9232		27.7597	30.8121			24.1588		37.3603	36.6601		25.7619	36.0963	44.006	31.6053	37.8719	26.9412			33.9238
	33.6143	32.6841		27.3871	30.3069			24.1293		36.2165	38.8176		25.6734	37.1586	43.7516	31.2628	35.1435	27.3287			33.6006
	33.5021	33.035		27.1009	30.0288			26.6639		37.2246	34.1617		26.0833	36.6465	41.6946	31.5487	36.267	26.2623			33.7413
	33.1416	32.6168		27.6543	29.7827			25.0608		37.0393	35.0953		26.4924	37.765	42.4572	31.8631	33.657	26.3688			34.0639
	33.22	33.3616		26.9933	30.2013			23.5255		37.0347	34.2755		26.1666	37.7565	42.0008	31.3746	34.5568	26.2219			33.8045
	32.9998	32.9135		26.9203	30.0096			24.147		38.1836	33.8076		26.264	37.6982	39.715	32.5189	37.5915	26.3035			33.4798
	33.6404	33.0325		26.8445	29.7141			24.0089		39.3946	33.9771		26.0823	36.7695	42.6863	32.8015	36.2868	26.5915			33.6803
	33.6236	32.2989		28.7355	29.6647			24.2467		37.9631	35.2464		26.5813	35.8414	42.4593	31.2969	35.4082	26.0814			34.0441
	33.6468	32.1888		27.2449	30.6517			25.8585		36.8083	35.0387		25.9332	36.1913	42.4066	31.0774	33.0303	26.134			34.2083
	33.6171	33.0163		27.1425	31.4205			24.6692		36.7748	34.3972		26.1035	35.7882	38.1421	31.6292	31.8516	27.0253			33.9625
	34.3634	33.1194		27.398	30.252			23.3356		37.1801	35.9137		26.5399	35.4329	39.594	30.8898	33.5497	26.5038			33.5236
	32.9955	32.1817		27.2098	30.4237			24.7369		39.7469	33.7856		26.1086	36.0868	39.073	31.2133	33.9165	26.5907			33.7402
	31.4265	31.5499		26.4161	29.8835			25.3405		38.7181	34.3375		27.0766	39.1684	40.8612	30.8949	35.4189	26.4689			33.0065
	33.2616	36.1113		26.9497	29.9549			23.6919		37.7881	33.6367		27.2482	38.0711	41.9052	31.5471	34.0562	26.3688			33.8152
	33.174	35.7209		27.4056	30.4411			27.1758		37.4119	34.2523		26.5764	36.49	39.7179	31.1254	36.1117	26.9812			33.7765
	33.3223	31.2736		27.4513	30.0022			26.6005		37.0539	34.0674		26.607	37.1279	42.0698	30.4939	37.2171	26.193			33.4894
	33.1672	26.3397		27.5906	30.7068			23.9342		38.1114	33.2436		26.8157	34.7827	40.8568	31.6751	37.2599	26.3345			34.6372
	32.9663	34.0057		27.2944	29.3414			24.0074		39.5193	33.8429		26.3376	36.1106	41.5385	31.8497	38.256	26.8599			33.8673
	33.0569	35.2229		27.8626	29.9241			23.2159		37.4874	35.8233		26.524	37.0616	40.9502	31.4279	37.276	26.1853			32.884
	32.9014	37.7339		27.044	30.1227			24.4861		38.1848	35.3516		27.7848	38.4651	41.4973	30.2603	36.091	26.4075			33.5341
	33.6004	36.3862		26.7811	31.0007			24.159		39.476	33.7198		25.1258	36.674	41.1354	28.3421	33.5249	26.3803			32.849
	32.8083	33.2891		28.1201	31.224			24.3854		35.8786	33.8839		25.7716	37.2206	41.3491	29.0905	34.5077	26.2814			32.9657
	33.6689	33.7872		27.3145	31.1297			24.5476		39.4675	34.284		25.4296	37.302	41.6408	31.5214	34.6331	26.3629			32.4794
	33.0332	37.2237		27.0715	30.6599			24.0961		37.4394	34.3606		25.1975	37.9748	41.4615	31.0321	36.0689	27.228			32.4612
	33.2181	46.8507		27.7635	30.2764			24.6413		38.6916	34.1399		25.8935	37.7041	43.8047	30.2888	36.0529	26.3263			32.2195
	33.7195	47.177		27.5943	30.0658			24.1546		39.0067	34.2575		27.049	36.4398	44.5579	32.205	34.5342	26.5862			32.8005
	33.2563	47.282		27.1231	30.5414			24.8712		41.2905	34.3532		27.2578	36.9538	40.3524	31.3645	34.0853	27.4372			32.8331
	33.2973	47.2283		27.5996	30.1183			24.4156		41.2708	34.6854		26.9202	36.1436	39.0261	30.765	34.2154	26.7415			32.6528
	33.4513	46.8931		26.8823	29.5509			24.4016		40.5794	33.6118		26.2439	36.904	38.5715	31.5555	33.0878	26.9772			32.4368
	33.3284	47.3399		27.0621	30.9963			23.956		42.2963	33.6205		26.552	35.7333	39.9179	32.409	36.7242	26.3735			32.4521
	32.2684	46.7337		27.4531	30.1309			26.5615		40.2052	33.8793		26.3759	36.4884	40.4881	32.6318	35.4538	26.4972			33.0322
	33.6509	46.8418		27.607	29.9557			27.0384		39.6511	34.205		25.9262	38.0449	41.1352	32.7948	38.5747	27.523			32.8142
	33.6604	47.3188		27.2115	30.0185			28.0334		38.4281	34.6231		25.8617	36.5957	41.1045	31.1524	38.116	26.9062			32.5324
	32.9969			27.1966	30.6958			27.3209		38.963	34.5277		26.2443	37.1761	41.626	30.19	38.0111	26.3176			32.4926
	32.7994			27.2436	31.0523			26.8982		37.9334	33.6972		26.6188	37.0036	41.3774	28.8715	37.2428	26.3901			32.589
	33.6763			27.3623	30.236			27.0581		38.0805	34.2279		26.8935	37.3358	41.8048	29.2063	34.4784	26.7126			31.863
	33.2433			27.3392	30.2108			26.4185		37.9202	33.924		26.6117	38.3775	39.639	29.9442	33.8517	27.472			33.1111
	32.4139			27.1588	30.4403			26.8101		37.9382	33.7909		25.8653	37.5927	43.8348	31.7092	37.0634	26.6218			32.2095
	33.8847			27.1008	30.6404			27.3513		38.3378	33.4769		26.432	37.7629	42.7957	31.9685	34.6608	27.2082			33.2236
	33.0494			27.3552	30.1982			27.4662		37.0083	34.3126		26.0517	36.5555	42.2214	30.6569	35.0821	27.2952			32.612
	33.7631			27.2871	30.7239			27.4354		36.1666	34.5631		26.1732	37.0938	41.6858	30.7115	35.2144	26.962			33.2553
	33.2038			27.6918	29.6956			27.3172		37.4272	35.3398		25.3221	36.5832	41.481	30.7261	34.6597	26.9042			32.6452
	33.2459			27.336	30.433			26.7536		37.559	35.2057		25.3187	38.1041	41.1658	31.0115	37.6499	26.6517			33.76
	33.3227			27.3507	30.3179			26.8934		37.8287			26.2093	37.6396	40.9463	30.0028	36.6737	27.4194			32.8342
	33.1685			27.3494	30.2856			26.3388		38.1883			26.3083	37.7156	40.0963	31.5688		26.2608			32.19
	33.6796			26.6314	30.029			27.4462		38.3081			25.6901	37.9739	40.9511	32.8825		27.4264			31.7565
	32.8709			27.5161	30.3919			26.8518		37.0137			25.6988	36.1125	41.6762	31.653		26.8483			32.3582
	33.5222			28.2933	30.6854			27.2978		39.4715			25.785	29.7254	41.5131	31.6595		26.8405			32.6413
	33.2789			27.4511	30.9026			27.3902		38.4772			25.9287	38.2494	41.3452	31.4407		27.4694			33.1949
	33.678			28.0439	30.3448			26.9822		39.9712			26.3717	38.1385	39.8278	31.0832		26.9655			33.1178
	33.2122			27.5621	29.9351			27.9447		37.0221			25.8362	39.2625	40.3401	31.6034		27.2961			32.2944
	33.6897			27.0775	30.2303			27.9062		38.0447			25.8311	37.6225	41.443	31.7739		27.2522			32.0349
	33.2906			27.545	29.6181			26.6969		40.5402			26.2421	37.3809	42.6617	29.9911		27.1741			32.2249
	33.082			27.6157	30.8339			27.088		39.573			25.7003	37.2711	42.2656	31.0486		27.1181			32.9429
	33.6516			27.1072	30.1219			27.593		40.7053			25.7651	37.2159	41.3199	31.4557		27.4983			33.3033
	33.2001			27.6334	29.9473			27.265		40.6505			25.859	37.1993	41.324	29.3441		27.3558			32.6199
	33.5889			27.7294	29.9782			28.1171		38.4868			25.7964	37.1568	40.1301	29.4845		27.1373			33.2559
	33.236			27.2086	30.3085			28.896		39.6733			26.2313	39.5006	39.8563	30.2413		27.3953			31.8946
	34.048			27.6124	30.6306			27.3303		38.9228			26.0584	38.292	40.4321	28.7328		27.2468			32.6686
	33.9233			27.7369	30.3597			27.0631		37.9626			25.3603	39.6271	41.5703	29.4117		26.9769			32.2386
	33.2767			27.3199	29.9652			27.5747		38.6728			25.8416	38.2159	41.1615	29.867		27.3434			32.7834
	33.2592			27.3168	29.8097			28.3602		37.5057			26.0325	37.8536	41.5625	29.9567		27.1624			32.5502
	33.5282			27.3353	29.5112			25.8566		39.307			26.1232	38.614	41.4651	30.6055		27.7639			33.11
	34.2047			27.3849	30.49			27.1077		36.591			26.4536	38.3683	40.9128	30.5136		27.3204			32.9175
	33.2966			27.3114	29.6571			27.9666		37.6874			26.3984	38.2361	41.2031	29.1074		27.7494			33.9696
	33.356			26.7356	30.308			29.5463		35.5781			26.5981	37.4206	41.422	30.5937		27.6907			32.7314
	33.3032			27.892	29.7274			27.7706		38.15			26.3582	38.4072	41.944	30.6018		27.6626			33.3902
	33.6087			27.7324	30.2792			27.5194		38.1711			26.3285	38.0526	41.6887	31.2897		27.7655			32.9282
	32.7289			27.789	29.8927			27.9354		37.8542			26.3882	37.9017	40.9394	30.2352		27.818			32.9422
	33.2111			27.7775	30.9199			26.8863		36.5348			26.5127	39.622	41.0035	30.7572		27.0125			32.1168
	33.889			27.7193	30.1425			26.4579		35.6493			26.4776	38.5716	41.5081	30.6924		27.7526			32.2443
	33.3094			27.3689	30.4018			27.3659		35.5805			26.5438	37.4039	40.5167	31.8812		29.0908			33.0908
	33.6133			27.803	30.4343			27.7581		37.3717			27.0387	36.816	42.6965	32.5611		28.7681			32.8452
	33.6279			27.3331	30.5413			26.2899		36.8102			26.7049	37.6806	39.8777	32.5541		31.0829			32.9597
	33.5961			27.5526	30.9264			28.0022		37.2949			26.6988	38.3715	42.3285	32.1466		29.687			32.5557
	33.8942			27.8481	30.1143			27.217		37.0133			27.2262	37.6949	41.3418	32.2663		29.1248			32.8668
	34.0504			27.9495	30.2232			28.3937		36.2181			27.0552	37.9927	40.8181	27.7374		29.0117			32.8493
	33.4107			27.2071	30.5691			27.9215		35.4821			27.1955	37.0311	41.4977	29.154		28.8483			31.667
	33.2122			27.8222	30.4766			26.583		38.9222			26.6129	38.2407	41.2365	31.3115		27.4097			32.5164
	34.4792			27.0158	29.5144			28.1836		36.7737			26.8382	37.3481	43.4785	30.8354		29.2092			32.2385
	33.5265			28.2917	30.2025			26.5595		38.4193			27.6715	34.2526	40.8899	31.2004		30.4729			32.0026
	33.4343			27.007	29.6375			29.087		40.7922			27.192	27.779	40.2974	31.2502		29.4275			31.948
	33.2447			27.669	29.9903			26.6178		40.5662			27.4618	35.7306	38.774	30.7255		29.3528			31.7871
	32.7339			27.5306	29.6274			26.9238		38.481			27.5955	36.995	40.8542	32.3221		29.8363			32.1098
	33.5468			27.1457	30.1171			28.3548		37.2603			27.6045	36.1374	43.9635	31.3555		30.3115			33.3753
	33.1312			27.3223	30.7183			26.0792		40.3438			28.2097	36.1214	39.6221	31.6739		29.1569			32.1921
	33.9832			27.8806	30.2993			25.9805		39.3238			28.9188	34.9417	39.3543	32.8131		29.494			32.4184
	33.0658			27.5053	31.5034			27.2687		38.3579			28.1197	36.8677	40.9773	31.6555		28.765			31.9349
	33.1605			27.46	30.0262			27.2783		38.2391			27.8695	35.5739	39.6157	31.9409		28.2139			32.2234
	33.3387			27.7184	30.261			27.5158		36.4707			28.0702	35.7693	39.1154	31.1653		27.8094			33.2327
	33.2648			27.9788	30.3059			27.6709		40.1272			27.9156	37.1186	41.5626	31.4913		27.5665			33.486
	33.6951			27.5751	30.3933			27.3045		39.5402			27.3838	36.2959	42.5753	30.8663		27.7606			33.2559
	33.6711			27.5879	29.9516			27.1121		41.9345			28.4318	37.7617	41.416	30.1181		26.7994			33.3777
	33.3913			27.5601	29.5814			26.3694		40.5411			27.0599	37.9799	42.5037	30.8772		28.0422			33.0079
	33.5555			27.8011	30.4378			27.5677		41.3561			28.4545	36.5447	42.8085	31.1547		27.8453			33.4138
	33.1982			27.6405	30.4704			27.0232		41.2991			28.2776	38.4335	42.1833	31.3876		27.6669			32.8516
	33.5058			27.348	30.0331			26.3614		40.2193			28.3166	37.4322	41.3566	30.6306		27.701			32.5717
	33.2419			27.3172	29.7392			26.9142		39.472			31.256	37.0125	41.1994	31.7443		27.0781			32.4957
	33.3294			27.2968	30.8943			27.3169		39.8665			28.9298	37.2225	42.2267	30.9303		27.8704			33.5065
	32.8023			27.7774	29.9322			27.0084		40.3372			30.2396	36.2546	42.0837	30.1191		27.3474			33.3121
	33.5279			27.67	30.239			26.08		38.526			29.7749	36.8464	43.2212	30.8091		28.1379			33.5194
	33.1969			27.6085	29.9494			26.7059		40.0436			29.3281	38.2748	43.4063	31.1831		27.3429			36.7276
	33.3016			27.5957	31.8162			26.8024		39.2938			29.6684	36.8363	43.7496	31.608		27.1074			34.221
	33.3087			28.1191	30.6295			24.9355		37.9363			29.5702	37.4031	41.0517	32.4682		27.0947			34.1138
	33.4592			27.8904	30.0637			27.1575		38.0837			29.1402	36.0117	43.2074	32.0709		26.7868			33.9723
	33.0378			28.6312	30.4176			28.0536		36.9396			30.5564	35.5732	42.5704	32.0819		26.7173			34.0598
	32.764			27.6758	30.5999			26.0627		39.3185			29.4949	35.0956	42.0331	31.8338		27.5869			33.8714
	33.2007			27.4996	30.5089					40.4732			29.5681	36.3153	41.8613	31.4093		27.1108			34.046
	32.3628			27.6702	30.262					39.0304			28.6864	37.0408	41.1269	32.6665		26.958			33.3513
	33.0276			27.2907	30.2592					38.9201			31.1561	35.9632	39.8989	31.4873		27.2012			34.3447
	32.2662			27.988	30.0284					39.4784			31.9947	36.0141	41.9235	31.5939		27.1845			32.8358
	33.7928			27.7445	30.106					39.8761			28.0937	35.5117	41.9007	32.2718		26.5859			32.6928
	34.7402			27.6275	30.2762					37.4823			28.3212	36.7576	40.1014	30.8595		27.0034			34.0075
	33.9242			27.4527	30.2251					40.421			28.0415	37.2182	41.3703	30.4545		26.8457			33.3149
	33.6551			28.3334	30.458					37.7663			27.5102	37.4754	41.8768	30.6515		26.7483			32.7922
	33.8814			27.57	31.7186					37.5977			28.2681	37.0746	41.1752	30.765		26.5177			32.8999
	33.3906			27.5809	29.7304					37.9606			27.2479	37.5531	40.2703	31.1925		27.1578			32.676
	33.465			27.7458	30.8681					39.6073			27.7695	37.7973	39.8701	30.3846		27.1369			33.3607
	33.8903			27.5734	30.8163					41.4052			28.1811	36.8257	40.2904	30.7743		26.7461			33.611
	32.4303			28.0076	29.648					40.8046			27.7804	35.7662	41.9678	32.6436		27.593			33.755
	33.259			28.1692	29.8525					38.8354			28.5099	35.9367	39.832	31.2167		26.6751			33.4059
	33.6936			28.127	30.5956					37.6277			28.2874	35.997	40.3582	28.7924		27.6219			33.169
	33.0077			27.8227	30.5174					37.2639			27.3864	36.1101	38.4504	28.9198		26.706			33.5112
	33.2413			28.1772	30.0572					39.0341			28.4167	37.1957	37.8969	28.2142		26.6025			32.9545
	33.6101			28.1959	30.7959					38.4594			27.7211	37.6713	41.1504	27.4986		27.8709			33.3247
	33.5176			27.5371	30.9341					38.5252			27.7712	36.9412	39.5083	27.4978		26.987			33.7159
	33.2572			28.2625	30.1285					40.754			27.4398	37.1568	43.0782	28.9449		27.3977			33.3725
	33.3595			28.1329	30.5358					40.1372			27.2533	37.8798	40.8194	31.7298		29.3956			33.5412
	33.584			27.5872	29.8366					39.6178			28.0542	35.8036	40.9583	31.5975		27.2491			33.1911
	32.702			27.6337	30.6128					38.4715			28.5963	36.3961	41.7506	32.6291		26.9625			33.8608
	33.1962			28.2466	29.7062					39.83			28.8633	36.7168	41.2244	33.1771		28.0035			31.7837
	33.6718			27.4489	31.3953					39.297			28.3232	38.9969	41.2242	32.062		26.9274			31.6572
	34.6412			28.1346	30.8297					39.8165			28.0123	36.5518	42.0209	32.5181		27.5867			33.8121
	33.2067			27.4623	29.6618					38.1164			29.0018	36.3564	41.5787	32.7639		27.5711			34.6887
	33.781			28.0449	30.2149					37.6131			27.7698	38.5413	41.4693	34.2285		26.6292			33.9104
	34.2485			28.4359	29.9523					39.6604			26.9633	38.4968	39.0087	30.6766		27.3405			34.6078
	33.214			28.2832	30.7798					37.5862			24.5797	36.7425	38.8607	32.8948		27.0648			33.834
	33.4532			28.1594	30.712					38.6455			24.2685	37.4413	42.0194	33.7792		27.9667			33.947
	33.4828			27.8932	30.1546					37.5183			24.8733	38.7512	41.1838	34.9831		27.5482			33.2301
	33.3225			29.1856	30.6392					39.2309			24.8128	36.8824	42.0402	34.0783		27.2721			34.0214
	33.0042			28.331	29.7778					36.604			24.7598	36.6529	39.5503	33.8287		27.2664			34.6594
	33.5006			28.4379	30.7689					35.7901			23.6596	36.1684	41.7238	34.7296		27.0167			33.2703
	33.6078			27.9754	30.1513					39.4143			24.8137	35.3716	38.0891	33.7849		27.4304			32.6246
	32.9148			28.4426	30.6439					37.5798			25.5695	36.5151	40.0133	32.5556		26.7068			33.334
	32.7757			27.8135	30.8643					37.8476			25.8947	38.5572	41.1604	31.3255		27.8685			32.4121
	33.6561			28.6242	30.511					36.4666			26.2678	37.6975	40.8882	31.2761		27.5192			32.7525
	33.6495			28.757	31.1551					36.0182			25.8764	36.8804	41.1415	33.1078		28.3389			33.2066
	33.1977			28.2714	31.1034					37.3739			25.793	35.5554	41.0591	32.6964		27.7084			33.677
	33.5504			28.7765	31.029					37.824			25.3553	36.0161	41.7718	33.1512		28.1532			33.9942
	33.1048			28.8694	30.7896					37.4507			26.3487	36.1009	43.3509	35.4951		28.2897			33.5173
	33.3865			28.6362	30.1722					35.8274			26.237	35.7529	42.1837	34.2258		28.8191			34.7548
	32.3052			28.7791	30.7221					37.5671			23.6627	38.3727	39.1308	35.4695		28.0384			33.367
	32.961			28.8597	30.2352					37.2575			25.8047	35.5481	38.0446	34.7536		27.8812			34.2545
	33.5242			28.8184	30.4341					39.145			23.6778	36.3246	41.6068	33.6121		26.3438			34.5808
	33.5585			28.8589	30.3119					40.3283			23.8885	37.2783	40.4069	33.2022		27.0849			33.3908
	33.2035			28.8064	30.6008					40.094			25.3639	38.1455	41.0844	31.0439		26.8552			33.9292
	33.4606			28.4852	29.9674					40.5014			24.9628	37.751	41.5706	30.5429		27.1125			33.1783
	33.1281			29.6434	30.432					39.3658			24.1454	36.8195	39.4388	31.0283		28.5831			32.8402
	33.4054			29.2395	30.7003					37.5762			24.1885	35.9064	40.1091	31.4994		28.5243			33.2169
	33.4003			29.309	30.0628					38.3688			24.4379	35.4992	41.8432	30.9555		28.9654			33.3258
	33.4561			29.0938	30.7605					38.0397			23.6578	36.7271	41.8374	31.1757		29.7776			33.6619
	32.9278			29.0565	30.6159					37.2317			24.0879	35.4494	41.6515	30.9131		29.8733			33.9177
	33.3195			29.1498	30.7839					38.276			24.2364	37.0318	40.6564	32.9714		28.8547			34.0301
	32.7866			29.6863	30.5053					39.7946			26.2965	37.4281	39.0751	32.1507		28.623			33.2344
	33.3295			29.7803	30.8345					39.8058			26.2577	36.7174	41.316	31.2045		29.6503			33.0121
	34.2414			30.3487	30.4198					38.4496			23.9203	35.1296	41.1092	31.2583		28.0038			32.7505
	33.4845			29.5546	30.8304					37.834			23.948	35.7354	41.442	32.448		28.9431			32.0883
	33.8092			29.6124	29.5779					35.6935			24.6883	37.1321	41.0043	31.7293		27.9282			32.8231
	32.9872			30.6747	29.4806					39.9794				35.8376	41.9096	29.663		28.1402			32.4085
	32.9232			29.8946	30.1801					39.6439				37.8476	41.7645	29.8016		28.749			32.8873
	32.7985			30.3436	29.9416					39.1388				34.2153	41.3934	31.8025		28.9224			33.614
	33.3182			30.2817	30.4404					39.5523				36.9245	41.1081	31.462		28.5027			32.5336
	33.4279			31.5783	30.1286					40.2424				38.7935	41.2589	31.4458		27.2494			32.3776
	33.1591			30.4804	30.1898					38.7543				38.2048	41.6269	31.3057		29.5015			32.8277
	33.6455			31.3972	30.4664					38.7382				37.164	41.8001	32.5924		28.6282			31.9041
	33.0541			31.554	30.7731					38.7053				37.3774	41.6432	31.7981		28.757			32.2541
	33.1357			32.2748	29.8533					39.6983				35.2964	38.986	31.6485		29.5666			31.645
	33.5641			32.3627	30.0278					36.5238				36.8595	38.8192	30.8452		28.0482			33.0448
	33.3742			32.469	30.2205					37.6109				36.9148	41.0105	32.7761		29.3415			32.3126
	32.9298			32.8068	30.9575					38.071				36.3248	41.3343	31.4003		27.819			33.3105
	33.1399			32.8066	30.2976					38.5006				37.118	41.6053	29.8756		28.1736			32.4054
	33.4371			33.5704	30.54					35.786				34.6893	41.3374	30.337		28.2215			32.9827
	33.1888			33.2029	30.6168					37.9917				36.8769	41.3863	29.5555		27.065			33.338
	32.9017			33.8403	30.8927					38.9359				37.9892	41.5807	28.0064		28.193			32.4156
	33.5755			34.5938	30.3406					38.553				37.3529	40.9407	30.3		28.9385			33.1352
	33.5439			36.0011	30.5797					36.3051				38.5268	40.902	30.6008		28.663			33.3306
	34.1971			39.3677	30.387					36.1653				39.2003	40.8417	32.3379		28.7339			34.2112
	33.2913			39.8868	30.6007					36.663				37.0498	40.4417	29.8582		28.7568			32.4863
	33.3694			40.1202	30.0803					37.4181				38.776	40.6179	30.7431		28.1933			33.3714
	33.0822			40.3747	30.2052					35.5137				37.6895	41.0824	31.6395		28.4976			32.858
	33.8331			40.8344	30.4379					35.2898				37.9526	41.2131	32.0337		29.1602			32.9362
	34.3394			41.5048	31.1754					36.279				36.4622	40.844	32.0677		25.6255			32.2164
	33.0804			41.6896	30.4495					36.1282				38.1451	41.6478	30.9478		28.0087			32.6806
	33.9118			41.9968	30.226					36.3236				38.1109	41.0447	31.6721		28.9471			32.3125
	34.3601			41.7776	30.5177					37.995				38.4561	41.1319	31.8325		27.0853			32.316
	33.3913			42.6329	31.2168					37.35				39.4059	39.8929	32.2907		28.973			32.3898
	33.8751			41.4652	30.8751					37.2635				37.2928	39.7455	31.8751		28.4959			33.4917
	32.5703			42.5119	30.5063					37.4592				38.2228	42.111	31.652		29.714			34.0181
	32.6837			41.8635	30.9532					38.3404				37.7774	41.2831	35.9457		27.1875			32.8977
	33.9546			42.5876	30.7788					39.2387				37.2329	41.5221	35.4192		27.0761			33.2371
	33.3522			42.0575	29.954					37.2367				37.62	37.6308	35.7184		27.5172			32.4521
	32.851			42.1524	30.4046					36.0416				37.708	41.617	32.1634		27.1589			32.2075
	33.3113			42.1529	30.4034					37.0698				37.6814	40.353	30.6002		30.1803			32.2906
	33.409			42.4241	29.6672					36.8483				36.7001	38.1465	31.6762		28.0147			32.4009
	33.3565			42.6798	30.5195					36.5604				37.4117	38.4255	30.9549		27.796			33.9992
	33.5677			42.0785	29.9451					36.9153				38.5564	40.1636	31.852		27.8708			33.8706
	33.1895			41.5426	30.7938					38.0134				38.9154	41.3852	33.5394		25.9767			34.2125
	33.2504			41.7155	30.6298					38.1694				39.4213	43.367	31.6099		27.1468			32.9885
	33.2118			42.191	30.0725					37.96				38.5591	42.8401	32.9043		26.4993			33.6803
	32.1997			42.1602	30.271					38.4554				37.9297	41.2936	33.7101		26.3064			33.6572
	33.5726			42.4199	30.3301					37.9886				38.9968	41.7961	32.9746		26.0017			34.8618
	33.4274			41.638	30.0415					37.6959				38.0568	41.6587	35.4139		26.4165			33.6485
	33.516			41.8683	29.9925					39.6531				37.3213	41.3852	33.7855		27.2568			33.4065
	33.2366			41.4989	30.4132					39.8681				37.3296	38.4821	34.3452		27.2591			32.9717
	33.3055			41.7081	30.5599					40.7236				36.8247	40.1648	34.3811		27.5035			32.9835
	33.2766			41.4521	30.5075					38.7346				37.2177	39.2508	33.7806		27.6068			32.5006
	34.0865			41.6885	30.4748					39.9088				37.2119	40.1227	34.2275		26.5486			32.2169
	33.3466			41.0787	29.8882					37.9852				36.7865	41.989	31.5659		26.8368			32.958
	33.4297			40.7993	30.483					39.8488				38.1995	42.4683	30.7137		26.9114			33.8165
	32.9375			40.6047	30.4816					41.3295				37.705	42.0175	31.5247		26.804			33.1588
	32.838			40.6803	30.6851					40.6357				36.2379	42.0724	31.261		26.0702			33.9936
	33.7626			40.4487	30.6904					38.0855				37.3826	40.9116	31.5005		26.2108			32.3772
	32.994			40.8884	30.6637					37.7286				37.6249	41.0635	31.3715		24.7485			32.3586
	33.5411			41.3	30.1788					38.7418				37.0124	41.3785	31.7332		25.4008			32.2725
	32.7515			40.4845	30.1942					37.7538				37.4152	40.8033	31.8912		25.514			34.2124
	33.2839			42.6613	31.0107					37.3843				37.0226	38.8388	31.4043		25.768			33.3216
	33.0039			43.733	29.7444					37.3066				37.025	41.1091	32.0804		25.2957			33.2667
	33.6428			43.1934	30.9398					37.7467				35.9842	41.3974	31.45		25.4708			33.5313
	33.7161			43.2759	29.9316					39.0659				36.4442	40.8472	32.2318		26.1282			32.166
	32.0271			42.565	30.7951					38.286				38.4083	41.0202	31.9965		27.0502			32.6855
	32.5799			41.3537	29.8679					38.4684				37.4055	40.2986	32.5704		27.1847			32.0338
	33.2151			41.4004	30.2892					38.3381				37.189	41.1659	30.6327		28.3109			32.6089
	33.1249			41.2883	31.0425					37.6912				35.7343	41.1836	31.4617		28.3776			31.9857
	32.9535			40.9862	30.2612					37.0393				34.647	41.2596	30.9836		31.9864			33.813
	32.7742			40.9712	30.3572					38.2946				34.3129	38.8575	33.1784		31.9959			33.4912
	32.6904			40.8466	30.4643					40.346				36.7835	41.8577	30.8489		29.665			33.3894
	33.0031			40.9574	29.4238					39.1585				36.3793	42.057	30.6691		29.2129			32.8656
	33.008			40.5544	30.465					41.3562				36.3345	41.5708	30.5602		29.449			32.9025
	33.6061			40.4242	30.2975					37.8508				36.0401	42.0597	30.129		28.4168			32.8615
	33.8464			40.4024	29.9393					39.9864				36.7259	41.143	30.4414		27.1363			33.0325
	33.2067			40.199	30.0319					39.1315				36.4062	41.4391	30.9669		26.7212			33.5744
	33.3002			40.1598	30.1891					37.9539				36.484	41.6058	29.2404		26.6895			33.0549
	32.4273			40.0734	30.6736					38.7491				38.0849	41.677	29.3601		26.5546			33.7433
	33.0678			39.9599	31.0147					37.3491				37.161	41.2821	30.931		26.8267			32.9905
	33.2955			40.3749	30.1339					38.328				35.1013	41.406	30.3902		26.9518			31.8947
	33.2561			39.6773	29.9957					38.3742				35.6104	37.2407	31.9138		26.7372			32.0564
	33.1661			39.5593	29.5342					38.2884				35.6645	40.9179	32.0521		26.4015			32.8
	33.5113			39.8262	29.5651					36.5149				36.8264	38.8275	31.5457		26.2488			32.5973
	33.5965			39.1835	30.5016					39.454				36.5326	40.5139	32.3111		26.2921			31.7263
	33.3971				30.2891					38.7816				36.8234	41.0236	32.2064		26.0118			33.2833
	32.578				30.144					37.9328				37.2012	41.8772	34.5452		26.9967			32.3059
	33.179				31.0492					36.1915				36.5627	42.1464	32.5908		26.5064			33.6394
	33.7736				30.0202					36.9543				37.0353	41.5831	29.9402		26.5497			31.8274
	33.6718				30.919					38.979				38.4996	39.0983	29.9458		25.9957			32.0651
	33.2541				30.7694					37.643				36.8019	41.3657	31.9607		25.5386			33.0093
	33.3325				30.2102					38.937				37.0439	39.4566	32.5464		25.8022			32.7866
	33.49				30.2219					37.6443				37.5697	39.1282	32.1884		26.2511			31.9292
	33.5295				31.156					38.52				36.7748	42.8651	32.3899		26.3053			33.1914
	28.7031				30.2046					39.1544				38.0742	41.646	31.0529		25.99			32.1227
	32.5909				30.6465					37.479				39.1704	42.186	30.4708		24.6526			32.1779
	33.2079				30.3862					36.6684				37.7849	43.0854	32.2117		24.8436			32.7137
	32.9853				30.3047					35.1905				37.26	39.9274	31.7136		25.6552			32.9022
	33.8367				29.6388					39.4527				36.775	40.1332	29.4621		25.1653			31.8994
	33.4699				30.4777					38.424				35.8591	39.5008	30.1126		25.4999			32.9753
	34.1276				31.1421					35.2178				36.2349	42.8524	32.0525		26.2455			32.8583
	33.6664				30.1297					37.3307				35.8138	41.9047	31.4561		25.8477			33.2162
	32.9223				30.6851					37.9317				35.3243	41.8938	30.5619		27.1967			33.1841
	32.7874				30.7468					39.4373				35.6238	42.3874	29.5442		26.1635			33.6015
	33.1171				30.8238					37.7811				37.6807	37.3928	30.583		27.0811			32.2569
	33.9644				30.9577					37.8764				38.0319	40.0391	32.6632		26.3769			32.094
	33.1385				30.3415					39.2837				36.6741	41.7185	30.1335		26.7324			32.4421
	33.3686				30.4153					37.9818				36.7701	39.419	29.7336		26.0926			32.2813
	33.1917				30.4439					38.9867				37.2965	38.0852	32.1079		25.5555			33.3026
	32.8824				30.6458					38.3145				38.2119	39.9157	30.9915		25.5594			33.0434
	33.71				30.3956					38.8806				36.5461	39.9653	32.182		25.6094			32.8439
	33.4366				30.2916					41.9308				36.2324	42.9118	33.328		26.0327			32.728
	33.1446				30.2228					41.4038				36.4657	41.1179	32.4268		26.153			32.2059
	33.5098				30.6219					38.1538				36.6545	41.8939	33.1874		26.0832			32.5499
	32.5125				30.6876					40.4203				36.597	42.059	31.5383		26.6606			33.4694
	32.8996				30.3794					38.566				36.0179	40.7164	31.1617		26.5494			33.4906
	33.4588				30.2155					37.1268				36.3377	40.3872	31.6053		26.3379			32.5605
	33.1322				30.8444					37.4688				35.5841	40.9235	33.2241		26.6466			33.0822
	32.878				30.598					39.1591				36.7392	41.0455	33.0774		26.3653			33.4222
	33.4884				30.0266					37.3215				35.2985	39.9821	30.6786		26.5821			33.1493
	33.7248				30.3693					36.8771				35.0073	40.4568	30.238		26.8485			32.2873
	33.2848				29.7764					37.3293				38.1964	40.9003	31.1488		26.4282			32.6809
	32.7446				30.4064					36.6545				37.7249	40.4906	31.495		25.9502			33.1752
	33.1341				31.0113					38.9646				36.9194	41.4239	30.5311		26.2089			32.4984
	33.6468				30.3191					39.3237				36.3379	40.8207	30.4095		26.2426			32.3728
	34.089				29.9873					37.1561				37.2751	41.7547	31.7824		26.8863			32.243
	33.4378				30.4272					38.3845				35.7239	40.9825	32.223		27.1198			32.4215
	33.3744				30.1213					38.362				37.8906	39.1074	31.8118		26.8767			33.8072
	33.6095				30.4443					38.5507				37.5164	41.9677	32.1454		26.4312			33.3254
	33.3309				30.7546					37.8683				36.1733	41.2115	32.387		27.1543			32.5305
	33.2575				30.756					36.2141				37.5116	41.1217	32.0268		26.5664			32.8674
	32.9128				31.313					36.5554				36.7041	42.2496	31.3436		25.7169			31.9577
	33.1466				30.2782					39.295				37.6159	41.8644	30.555		27.9276			32.663
	32.6997				29.9621					36.6977				36.4577	42.1208	31.1117		27.6837			32.6672
	34.858				30.0781					39.9825				36.9494	39.4578	32.3963		27.6668			32.5499
	33.7356				30.4084					36.728				37.4917	39.5636	31.8452		26.6449			33.6921
	33.061				30.4189					36.6006				36.3306	41.2505	32.4192		27.7522			33.1993
	33.1522				30.5193					37.9016				35.6157	42.1712	32.1609		27.7733			32.59
	33.7114				30.9361					38.6651				35.978	41.079	32.1687		26.4849			33.2611
	33.7646				30.6316					38.0161				36.1298	40.7073	33.6158		26.1445			32.7922
	33.4114				30.1529					39.5399				36.2557	43.4335	32.8195		26.0449			31.6211
	32.3498				30.5913					39.0774				38.2987	42.5466	33.3269		26.5982			33.1627
	33.3636				30.8014					39.5514				36.2264	39.788	34.3368		27.4176			33.0254
	33.0885				30.1858					38.2843				38.0875	40.483	34.0645		27.231			33.5773
	33.379				30.2555					36.6926				36.8935	42.4817	33.799		27.7014			32.7149
	33.8558				29.866					38.0727				36.6608	41.7843	34.6703		28.0599			32.9866
	33.4163				30.1377					36.4156				37.5744	42.3337	35.2482		25.5593			32.5744
	32.9865				31.4613					38.5016				36.2851	39.7195	37.0651		26.6935			32.7717
	33.352				30.2681					39.0763				35.0261	39.8738	36.2434		25.8361			32.7243
	33.6072				29.938					37.2236				37.1328	39.8845	34.649		26.4475			32.813
	33.4194				29.8455					40.8358				41.3065	38.2372	32.5349		26.5539			33.7376
	33.6093				30.4039					39.4273				36.5106	37.4989	32.3273		26.7615			33.7729
	32.8063				29.9189					38.2726				36.8603	39.503	30.9877		27.1378			32.3515
	32.7068				30.6931					39.3252				36.8009	41.5184	31.7278		26.2507			31.2212
	33.2877				30.3792					40.1912				35.7781	41.9475	31.9423		26.1157			31.817
	33.5832				30.5653					40.4416				23.6611	42.3765	32.3446		26.2354			32.3822
	32.6313				30.7144					40.8834				36.5658	40.7763	31.7993		26.9857			32.0126
	33.2977				30.6316					38.5419				36.2279	42.3638	32.0609		26.0794			32.5173
	33.4353				30.6628					40.7257				36.0409	42.4829	31.0182		26.4516			32.2977
	32.2845				30.7054					39.9019				36.876	41.1985	30.0063		26.7293			32.9376
	33.1533				29.8163					39.8864				36.5116	41.9278	31.7359		26.7606			33.3373
	32.8653				31.3114					40.7701				38.8368	39.8731	31.4581		27.2805			31.703
	33.3121				31.1713					38.9501				36.1604	42.5731	29.8979		27.328			32.5038
	32.8013				30.213					39.561				36.7026	41.1113	31.4213		27.1789			33.1988
	32.985				30.4602					39.3919				38.7932	42.4439	30.8825		25.8795			32.8603
	32.7835				30.7673					37.8066				38.3513	41.2827	30.7671		26.2592			32.2713
	33.1024				29.9652					37.8358				37.5599	41.3908	30.6691		26.2471			33.7202
	33.3119				29.71					38.6047				37.219	41.7	30.7665		24.5005			32.7055
	33.2868				30.1407					37.9683				37.0876	39.7706	31.0389		26.5331			33.1023
	33.8655				31.0811					36.8387				38.2736	39.2023	31.3524		26.4921			32.9859
	33.1167				30.3338					37.5104				38.9619	39.7105	30.6013		26.2491			32.689
	32.3549				29.7584					37.093				37.7392	39.5151	31.3647		26.5649			32.1273
	33.0885				29.9895					37.8463				38.7168	41.9756	31.8466		27.1523			32.6596
	32.4973				30.1292					37.2374				37.3516	41.0151	30.7806		26.6121			33.3957
	33.1072				29.9625					37.2174				37.8355	41.4925	32.5002		26.6036			33.1036
	33.3707				30.447					38.215				39.356	42.0829	31.4086		26.6015			32.2696
	33.6126				30.0498					35.4919				38.0861	43.0566	30.9715		26.0205			32.019
	33.0269				30.1722					36.8332				38.0499	41.0139	30.5311		25.3678			33.0928
	33.1271				30.9938					36.5617				37.2567	39.3966	31.5565		26.2303			32.41
	33.0804				30.4526					38.3694				38.2948	38.9688	31.5332		25.9271			32.5827
	33.601				30.2686					36.9089				37.1211	42.8285	32.4172		25.5235			31.9277
	33.0453				30.612					37.0178				38.4693	41.4346	30.8866		26.1977			32.6003
	33.8403				30.5852					36.8461				36.3971	41.2908	31.7633		27.6508			32.8346
	33.2716				30.5995					36.6855				37.4779	41.2295	30.1538		26.9248			33.8209
	33.3121				30.8187					38.9104				37.3737	43.0724	30.9748		27.3476			32.7307
	32.8423				30.7002					37.0429				38.2301	41.4651	31.1788		27.1637			33.8642
	33.0913				30.4745					38.8307				38.1325	42.1257	29.3385		26.5511			33.8982
	32.3956				30.8265					37.3991				38.7028	39.902	28.3383		26.3904			32.9793
	33.3187				30.7612					35.161				37.2883	40.9057	29.2238		27.3478			33.0446
	33.6411				30.7143					37.3826				36.8927	41.5984	29.998		30.9277			32.896
	33.8115				30.0328					36.7184				36.807	43.1423	29.2648		29.0119			33.4124
	34.1072				30.6344					37.6156				35.7312	40.6231	30.5148		25.894			32.8913
	34.0116				29.9979					37.5147				37.2705	42.0505	30.9129		27.4724			32.9328
	33.8604				30.4405					37.7734				37.5563	41.5611	30.3031		27.3263			33.2982
	33.2294				29.758					33.5667				26.6719	41.4565	30.6485		26.5566			32.052
	33.6973				30.6945					37.6417				31.8832	42.163	30.4238		26.1033			33.0666
	33.134				30.2922					38.8455				36.346	39.7087	31.7156		26.5041			33.2288
	33.3221				30.6443					36.5035				37.3245	38.5713	31.166		26.1745			32.4429
	32.8784				29.7809					40.26				38.5043	38.5143	30.8722		25.9575			32.7877
	32.7742				30.2222					38.6487				37.3735	37.6869	30.8696		26.3212			32.7534
	33.4214				30.7537					37.5798				37.7092	39.0792	31.3412		25.9364			31.6566
	33.723				30.809					38.4269				38.5611	42.586	31.6007		25.0133			33.9464
	33.1661				30.8485					39.5061				36.8758	43.0191	31.7214		25.5033			33.2029
	33.02				30.7607					39.3394				37.7225	41.9461	32.0856		26.1817			33.0531
	32.9298				30.4					39.2747				37.9613	41.6893	31.5438		26.0302			33.5433
	33.9977				30.4514					38.6853				37.9808	41.8469	32.5403		25.2949			32.4472
	33.1137				30.4295					38.8796				40.1039	42.3721	32.9864		25.3127			33.4701
	32.4647				31.4985					41.3597				36.9204	40.5706	33.0447		25.7428			32.6421
	33.6718				30.6623					41.3252				37.0222	40.9264	31.4291		25.5461			32.7129
	33.1664				30.4816					38.5213				35.5378	39.0181	31.9363		25.3486			31.9538
	32.6616				29.9115					31.7316				34.2227	40.5729	32.4653		24.8549			32.4472
	33.7444				30.7939					36.7863				35.3503	42.5231	33.221		23.6715			33.8007
	33.901				30.3253					33.1192				36.9307	43.2378	33.3459		23.0572			32.8036
	33.2688				29.6517					36.1903				36.545	39.6459	34.1383		25.4882			32.9693
	33.3235				30.5369					39.4302				35.7523	39.2009	35.83		26.2714			32.296
	32.6748				30.5381					41.2266				36.4281	42.2474	36.1983		28.9186			33.2914
	34.2531				30.0367					39.2491				36.5174	40.5861	35.0012		26.925			32.9757
	33.1706				30.5183					37.3807				36.1341	41.4074	34.8016		28.1029			32.149
	32.6566				30.859					39.9135				36.1041	40.8813	33.6833		28.0622			32.206
	33.3355				30.9603					37.39				36.8475	41.1219	33.113					32.6059
	33.0173				30.362					36.7003				35.8168	40.3385	33.1959					33.3983
	34.0509				29.9428					38.9486				35.9111	40.603	32.9139					32.996
	33.9009				30.544					38.162				34.7537	40.5376	32.5914					34.2135
	33.1207				30.4499					36.0491				35.3065	41.8268	29.182					33.2371
	32.2708				30.784					35.6392				35.5103	41.1238	27.4634					34.0445
	33.5047				30.6695					35.8773				35.3741	39.6452	29.1842					32.7675
	33.0948				30.0891					36.5948				35.7838	41.9885	28.7866					32.8169
	33.7704				30.5917					36.7458				36.7542	38.6704	31.3925					31.9152
	33.2476				30.4535					35.4929				36.6568	42.4159	32.3572					33.0062
	34.3646				30.3477					36.249				36.6175	39.2064	33.0663					32.9949
	33.6464				30.4867					36.2736				37.7686	39.2244	32.2533					32.8657
	33.1559				30.2236					37.8207				36.9884	39.2598	32.3875					32.9448
	33.2761				30.7659					37.1078				37.3214	42.0673	32.9923					33.1908
	32.8573				31.1623					36.4236				37.4191	42.0313	33.2707					32.4212
	33.4542				31.6152					36.504				36.5893	40.4635	31.7109					33.1863
	33.2529				30.6115					40.1776				36.7882	42.6098	32.1374					33.0829
	33.4623				31.122					37.118				36.8823	40.3529	30.6036					33.382
	33.6529				30.4452					39.24				38.5098	42.5809	30.8687					34.1389
	33.2425				30.5479					37.7101				36.119	38.713	31.9847					32.9291
	33.2799				30.9916					38.2694				36.9087	38.3361	30.7752					32.4059
	33.265				30.3428					37.3399				36.794	41.3511	32.7347					33.448
	33.5749				31.2415					38.6921				37.7457	40.9175	31.6196					32.768
	32.8061				30.2818					38.5804				38.5992	38.9635	32.5669					32.5025
	33.2218				30.4147					35.4799				37.1867	40.9592	33.1944					32.6299
	33.2851				31.2945					37.9742				36.9851	42.0021	33.6416					32.2168
	33.7785				30.4201					38.0765				36.4407	41.3229	32.7444					32.2031
	33.3687				30.2231					37.0759				36.4976	41.8862	33.3366					33.2771
	33.1441				30.8562					37.7035				35.7839	40.7714	32.4894					33.3495
	36.0941				30.5565					38.2779				34.9554	41.6845	31.5798					32.2471
	33.8447				30.4641					39.5116				35.656	39.1831	30.4728					33.1665
	32.9109				30.2109					37.732				35.4809	41.8687	28.6055					33.4649
	33.5156				30.5557					38.8894				38.1082	42.3492	30.7807					33.8489
	34.5613				31.0264					39.1607				36.4563	42.3037	30.0445					32.5041
	33.766				30.5956					38.6348				36.9916	41.6992	31.7142					32.0393
	33.2068				29.7541					40.7357				37.2333	39.9341	32.0452					32.0301
	32.7114				30.8522					41.1328				40.2692	40.6878	33.3384					33.4133
	32.9326				30.8317					42.6912				37.429	38.5968	34.2739					32.3643
	34.0951				30.2477					40.4333				38.0026	41.3627	34.0428					32.3948
	33.2563				30.9554					38.1635				37.3371	41.249	32.2491					31.9589
	32.8037				30.8566					40.6514				37.2929	41.1552	32.2359					32.9086
	32.762				30.3896					36.574				35.8838	41.1652	31.8926					32.7397
	32.5168				30.6384					38.48				35.2553	39.1873	32.13					32.949
	33.0127				30.7414					38.5538				35.4608	39.0006	31.6934					33.0756
	33.452				30.4041					38.2969				39.7037	41.2016	31.0578					31.5166
	33.3261				31.105					38.5042				38.838	43.2848	32.7792					32.2161
	33.2899				30.3226					37.6576				36.4739	40.4677	32.1807					32.1273
	34.043				30.0572					38.1535				35.7887	40.383	31.8572					32.2036
	32.921				30.4609					36.8561				35.1415	41.0024	31.5959					34.1223
	33.228				31.3354					36.81				36.96	40.7859	32.261					32.8342
	33.1478				30.6904					36.0747				36.3537	40.9954	31.6205					32.8136
	32.4592				31.274					36.9838				37.6888	41.2652	30.5894					32.6929
	33.5764				30.803					38.2529				37.3851	41.6035	30.5355					33.0922
	33.559				30.3403					38.2686				37.3585	41.379	30.0865					33.0517
	33.0141				29.7835					37.583				37.9614	40.5608	30.0114					32.8141
	33.4963				30.2133					38.2551				36.1756	42.0794	30.3633					34.5773
	32.8905				31.2054					36.5076				36.5751	40.7697	31.0153					34.357
	33.7159				31.481					36.5716				36.6485	41.8965	30.5094					33.2763
	32.7894				30.3053					38.6225				36.0098	42.0849	30.1734					33.1072
	32.9914				30.7841					39.0205				36.3385	42.1203	29.7521					33.3811
	33.1105				31.338					37.927				36.6934	39.2627	31.4441					32.5847
	33.3548				30.6708					36.66				35.0409	39.8703	30.9477					32.3963
	34.1189				30.2841					36.0428				37.7737	42.059	31.4747					33.232
	33.4158				30.9016					37.6922				36.2173	42.5865	31.6308					33.7737
	33.4885				30.4403					37.0592				36.7888	41.6583	31.4163					32.3332
	33.553				31.3513					35.6423				37.2243	40.7067	32.3817					32.0868
	32.7906				30.8693					36.1346				36.7236	42.3257	31.5017					32.6499
	33.7826				30.6721					36.1402				37.6142	41.8947	30.4265					33.8654
	33.0905				30.4752					36.466				36.4579	41.9559	32.1558					32.8628
	32.7233				30.4472					39.4174				38.3172	41.2701	32.1376					32.1845
	33.5038				30.8251					37.4878				38.7822	41.4054	32.6647					32.0838
	33.4797				29.9383					38.4012				38.2802	42.2241	32.0438					32.667
	33.1867				30.8219					37.9653				37.5928	41.5005	32.1708					33.3514
	33.5308				31.2135					39.8386				37.2194	41.58	31.5118					32.1763
	33.4443				30.3695					41.8243				36.2027	40.7806	31.4813					32.0068
	32.5781				30.5959					37.5785				37.9187	41.7095	31.4866					32.9355
	33.8099				31.2897					35.7983				38.7346	38.6947	30.1799					32.3484
	33.1091				30.3931					40.4998				39.8502	40.2094	29.9591					32.5519
	33.3459				30.8841					39.1387				36.0523	41.5712	30.9153					32.8608
	33.5203				30.4555					38.0102				37.7306	41.0242	30.5797					33.1758
	33.972				30.61					39.163				38.9147	41.0118	30.7925					32.1254
	33.7225				30.102					38.4805				38.4459	40.9508	30.2151					33.669
	33.0991				30.5983					38.4621				38.2773	39.839	30.1847					32.5619
	32.6485				30.5877					38.7345				37.3987	39.1283	30.7372					33.0765
	33.0197				30.506					39.1464				37.4893	40.795	30.1624					32.8603
	34.149				30.1777					37.8587				38.1664	37.8908	30.0324					32.1276
	33.7527				30.1866					38.3815				38.7261	38.0201	30.8403					33.1193
	33.4382				30.4806					36.8495				37.3604	37.4248	30.2393					33.7556
	32.1716				30.4565					38.3171				37.69	40.0254	30.7067					32.4806
	33.3477				31.306					37.6839				38.2559	42.2209	29.9763					33.2265
	33.2915				30.5731					37.9481				38.2399	39.5721	30.2047					32.9024
	32.82				31.3468					37.642				36.5279	40.5441	31.6245					31.5941
	33.8832				30.0601					38.3742				36.4778	42.1279	32.691					32.6448
	33.0006				30.9363					38.5595				36.4723	43.1781	31.5312					34.2114
	33.5643				30.6286					38.6475				36.5596	40.5249	32.4856					34.043
	33.5566				30.7396					36.9938				36.7402	40.7165	32.0415					34.1076
	33.8141				30.9029					38.2028				37.6514	41.8423	30.1685					33.7615
	33.1962				30.2528					37.6517				37.4703	40.4782	31.7708					33.1018
	33.4136				30.2848					38.0226				38.6172	42.0651	31.2478					32.873
	33.4038				31.0024					38.7172				37.4469	42.8647	31.8008					32.9943
	33.2024				30.8809					38.6414				37.2935	41.0483	31.4334					32.2033
	33.5463				30.7253					36.9361				37.7266	40.2292	31.5778					32.788
	33.8725				30.316					39.9193				35.8458	42.3203	31.5658					34.4212
	34.178				30.5498					40.187				36.3199	40.7807	30.8236					33.6564
	33.5713				30.2608					41.7767				37.8711	40.7948	28.6682					33.8959
	33.2182				30.4684									32.0031	38.5259	28.2326					32.9822
	33.0517				30.854									37.234	42.1255	29.3436					32.8127
	32.9622				30.4305									37.4328	41.2468	31.4846					33.278
	33.5526				30.8641									37.706	40.6577	31.7772					34.7537
	33.5156				30.4797									35.9407	40.9084	31.0143					33.3458
	32.9611				31.2615									36.522	37.8388	30.7852					32.8184
	33.4613				30.815									38.6106	39.3758	28.8352					33.9055
	33.4845				30.4656									36.1976	40.4992	29.5612					32.2988
	33.2354				29.942									36.2773	41.5755	30.9317					31.8926
	33.626				30.7576									35.9056	41.5194	30.4246					33.139
	32.9582				30.3664									36.3514	42.2893	30.2873					32.4951
	33.0809				30.8874									37.1119	39.4743	32.5883					32.5859
	32.7264				30.5391									36.9439	42.4933	32.7916					32.8699
	32.9901				31.7988									37.3625	37.7353	32.2077					32.5687
	32.7875				30.4074									37.2214	39.2244	32.4553					32.5257
	33.7995				30.7553									37.3104	41.9806	32.3058					33.5809
	33.5661				30.1626									35.962	41.772	30.3401					33.3656
	32.8176				30.3288									37.5027	42.1393	31.2364					33.3875
	33.509				30.668									36.0077	41.0835	30.819					32.8305
	33.2892				30.6671									36.1841	42.1369	30.147					32.8482
	32.5091				31.2798									36.0147	40.9571	28.524					33.4211
	33.9928				31.5904									35.3389	37.8124	30.8103					33.8844
	32.9316				30.5879									36.2199	37.6115	28.9292					34.3227
	32.2485				30.1883									37.1868	36.895	28.8263					33.4214
	33.1859				31.3783									37.8761	37.6981	28.1837					34.8145
	32.807				30.9005									36.2479	41.0633	29.5579					33.1931
	32.909				31.5918									35.8138	40.9717	31.6029					32.3644
	33.0649				30.3844									36.3826	43.3281	30.6722					33.6519
	33.619				30.2059									38.4688	41.6379	29.4147					34.73
	32.8832				31.967									35.0577	41.5192	29.7785					33.5847
	33.2571				30.1845									36.149	41.4169	30.3517					32.0517
	33.4502				30.1607									35.7313	41.5695	29.7579					32.4654
	32.5193				30.7867									36.1845	42.1073	28.7068					34.1998
	32.8263				30.5418									36.2746	41.8037	30.7566					32.4617
	32.9982				30.8455									35.5612	39.159	30.4157					32.97
	33.8568				30.769									36.056	40.1361	30.5026					33.0695
	34.3097				30.4225									36.3803	38.3992	32.0277					33.1458
	32.7967				30.5774									36.9703	41.2298	31.6605					33.0262
	32.8261				30.9003									36.4976	41.6016	31.5401					34.2006
	33.5289				30.452									35.9353	42.2304	31.7664					33.397
	33.1467				30.5383									35.9352	42.286	32.0403					32.8984
	33.5282				31.1782									36.1731	42.3233	33.7757					33.1844
	33.4287				30.6738									36.3534	41.9595	31.3166					32.8503
	34.0083				30.4785									36.2689	42.1274	32.0515					32.3908
	32.5095				30.8472									37.5857	42.2478	32.7492					32.7433
	33.5383				30.6791									35.9813	42.221	31.9666					32.7622
	33.5699				29.82									36.4417	42.3731	35.6615					32.0711
	33.25				30.4004									37.1	42.9398	32.4359					33.8169
	33.8071				30.1487									38.8408	42.1966	31.7264					32.7871
	33.86				30.882									39.3679	38.4919	32.2323					32.2208
	32.4309				30.2703									36.5128	39.7091	32.7603					32.5139
	32.6503				31.1476									36.832	40.2352	31.4007					32.6276
	34.078				30.2496									37.4036	41.4353	31.2351					33.042
	33.09				31.0583									36.3693	40.1293	30.1862					32.1175
	33.3176				29.7776									37.0791	40.5501	30.007					32.1436
	33.2592				31.0288									35.8485	41.2494	30.3812					31.8836
	33.0391				30.5408									35.598	41.0116	31.7093					33.4364
	32.9806				30.5221									36.221	41.2512	31.1877					33.3444
	33.4274				30.5185									38.8365	41.2198	30.1763					32.0496
	33.0754				30.407									35.3072	40.9088	30.6899					33.5725
	33.0206				29.8374									35.953	41.7264	30.7048					32.1439
	32.7414				30.6951									37.3755	40.9957	29.8995					32.2027
	33.3729				30.3482									38.2771	42.9082	30.8454					32.5163
	33.5354				30.4669									37.353	41.4748	30.8924					32.1758
	32.972				30.8836									37.8315	37.6996	31.4893					33.2039
	32.6046				31.2493									36.9007	36.4762	32.3981					32.7192
	33.1953				31.0092									35.9302	38.6307	31.76					33.2409
	32.9145				31.2303									36.0418	38.4657	31.2227					33.0268
	32.9787				30.8394									37.0785	40.8574	32.6416					33.0777
	33.5251				30.062									36.8518	41.3137	31.6847					32.1501
	34.0815				30.5902									37.3511	41.61	30.9949					33.0307
	33.6366				30.0713									35.6386	40.5344	31.7227					32.276
	33.3874				31.0836									36.9259	40.6812	30.7106					32.1152
	33.5102				30.6233									36.2714	40.3194	35.0531					32.3114
	33.2641				30.79									35.3268	39.9719	30.9187					33.12
	33.6838				30.6442									36.8698	41.4379						33.7249
	33.5186				30.5614									37.5124	41.8154						33.1471
	32.7242				30.0438									38.1533	41.4274						31.679
	33.7282				30.1742									37.516	40.4653						32.0926
	33.3033				30.3779									38.5712	41.3598						32.3212
	33.6304				30.1025									37.8156	41.4088						32.9571
	33.2425				31.043									31.3665	40.0099						32.5923
	33.5449				30.4873									37.2066	40.6783						32.3973
	33.7027				30.549									38.1661	40.4256						33.0234
	33.8596				30.2866									38.7614	41.231						33.461
	33.4266				29.815									37.5998	41.6711						32.0382
	33.104				30.8415									37.8416	41.1409						32.5753
	33.2037				29.9749									36.9176	41.2801						32.1769
	33.1345				30.4126									36.1547	40.2723						32.4514
	33.4209				30.4436									36.6375	41.7752						33.2332
	33.6498				29.9416									38.0302	41.7835						31.8967
	33.7472				30.535									39.2535	40.8777						31.7239
	34.151				30.8205									36.9458	41.0469						31.8383
	33.5513				30.8293									37.5454	41.7371						33.0268
	33.5858				30.8697									38.4073	41.1875						33.0828
	33.0979				30.7588									37.9962	41.6944						33.5906
	32.8495				31.2575									37.6483	40.1963						32.9664
	33.6242				30.6928									37.4436	38.6718						32.0056
	33.2785				30.7753									38.4886	39.3265						32.5649
	33.4172				30.6318									38.0918	40.6278						31.77
	33.5389				30.5822									38.0506	40.6646						33.456
	33.3108				30.575									37.492	39.519						32.1296
	33.6975				30.0498									36.7709	42.5507						32.5782
	33.9804				30.9674									37.4354	42.1171						32.3003
	32.4355				30.8325									38.0156	40.9221						31.8209
	33.1134				30.2167									37.8945	42.2357						32.4003
	33.3291				30.1226									36.7989	41.7061						33.0327
	33.3784				31.1069									37.6413	40.2413						32.1799
	33.4698				31.0666									33.7587	41.096						33.1068
	33.667				30.1018									37.11	40.2093						32.1671
	33.8818				30.6392									37.5196	41.4361						32.2165
	33.7781				30.6897									36.5221	41.8473						32.6707
	33.4472				30.9344									36.6316	41.3598						31.8639
	34.0216				30.3351									37.9387	40.5638						31.8383
	33.3344				30.6058									37.0022	40.5003						33.0416
	34.0499				30.4361									36.6791	38.4957						32.0993
	33.0456				31.0416									36.7228	41.437						33.7313
	33.5238				30.382									37.4438	41.8812						33.1256
	34.0443				31.1965									36.6972	42.0816						33.1864
	33.0084				31.179									36.1778	41.296						32.4457
	33.6451				30.3508									36.3035	41.3408						32.0901
	32.7363				30.7931									37.9917	41.9679						33.6886
	33.1999				31.0282									37.9647	39.3135						32.368
	32.828				30.3144									37.3875	41.9538						32.9323
	33.1238				30.9678									36.5248	41.361						32.6623
	33.2527				30.5869									36.7848	40.9133						32.6236
	33.5037				30.5478									37.8232	41.4222						32.9497
	33.5027				30.2814									36.2735	40.3628						33.5289
	33.5432				30.3915									35.8834	38.617						32.8285
	33.3241				30.3901									36.5134	40.5607						33.0236
	33.9531				30.7071									37.5245	41.983						33.1177
	32.8906				30.4616									37.3923	41.3227						33.2208
	32.8758				31.3948									36.7372	42.5341						32.6587
	34.0399				31.576									37.5668	42.132						31.9482
	32.9322				30.561									37.9018	41.5452						33.314
	33.2696				30.6338									38.0266	41.5867						33.029
	32.8069				30.6696									36.9093	41.191						33.619
	32.8876				31.0671									36.4047	43.0778						32.652
	32.7743				30.8445									37.3005	40.6361						32.2209
	33.1553				30.9434									36.2477	40.8689						32.5342
	34.0963				30.4545									35.5861	40.8401						31.9166
	33.651				30.0321									35.6098	40.3582						32.0251
	33.5497				30.4873									35.8208	40.4896						32.2672
	33.4196				30.2654									36.6898	41.5572						32.7075
	33.2584				30.2698									37.1712	41.5691						31.81
	33.4035				30.3278									37.9816	40.7451						32.5821
	32.5563				30.1317									37.5886	40.8426						32.2426
	32.6492				30.3432									36.3246	41.5919						32.3993
	33.5723				30.1744									37.295	40.3061						32.2301
	33.1039				30.6318									36.1076	38.4695						33.2919
	33.6353				30.1412									36.1741	41.0058						33.8894
	33.2823				30.648									37.6445	40.9518						32.644
	33.1213				30.5537									37.3191	41.7409						33.1316
	33.3667				30.4499									35.85	41.4415						32.757
	33.8223				30.6385									36.5197	37.815						32.2515
	33.3262				30.4212									37.5194	38.4208						32.8892
	33.0843				30.1088									36.3459	41.547						32.3812
	33.369				30.3519									36.6288	41.5129						32.9408
	33.7832				30.3344									35.5304	41.3922						32.9561
	32.9995				30.0326									36.5445	40.9691						32.2296
	32.9125				30.3032									36.6037	41.2271						31.7501
	33.9882				30.4008									35.9181	41.4821						32.6481
	32.9255				30.5604									36.0586	41.5371						31.9288
	33.3258				30.3747									36.4877	41.6687						31.2844
	32.8873				30.4154									36.6679	41.8417						32.5336
	33.2609				30.2986									36.0879	41.7401						33.0451
	33.3173				30.7112									37.9859	40.4446						32.8002
	32.7324				30.6885									36.4911	39.6136						33.2233
	33.9191				30.4517									36.032	41.7147						32.6236
	33.2664				30.7228									36.5307	41.8375						32.5044
	32.6637				29.9635									35.8869	41.3511						32.1491
	33.3903				29.963									36.4031	42.7108						31.975
	33.4465				30.5077									36.152	42.8022						33.9204
	33.0854				30.5184									36.6325	42.5592						34.0364
	32.9581				30.6327									34.4942	40.4059						33.9911
	33.2314				30.893									36.4841	41.2817						34.045
	33.66				30.4172									37.1715	42.2107						32.9835
	33.3993				30.2067									37.8377	42.0054						32.1975
	33.6746				30.6107									35.8134	42.1599						32.352
	33.3182				30.7776									37.3086	41.4491						32.5308
	33.5089				30.3989									37.4302	41.008						32.3998
	33.0559				29.7724									36.8637	42.4027						32.5925
	33.3062				30.208									37.0439	41.8584						34.0361
	33.6127				30.0559									36.1683	41.3174						32.6478
	33.8304				30.097									37.1389	41.0839						32.4631
	33.7496				30.156									35.7887	40.7684						32.8884
	33.1031				31.02									36.3306	41.5737						32.4346
	33.4353				31.1917									37.2978	41.3846						32.2867
	33.136				31.0388									37.238	43.0617						32.8755
	33.3236				30.4736									35.6228	42.5341						33.402
	33.403				30.7318									36.55	41.8982						32.3971
	33.5031				30.0442									35.5959	42.8548						32.8782
	32.7435				30.9679									30.5075	41.0425						33.3532
	32.9643				30.2264									36.0418	41.685						32.1777
	32.9855				30.4016									36.979	40.5219						32.7857
	33.0951				30.0456									37.5793	40.3371						32.7359
	33.0365				30.6492									36.6507	38.627						31.5054
	33.6502				30.4963									35.7647	40.0132						31.8699
	33.0397				30.012									36.2335	41.3						33.4484
	33.5538				30.3068									37.275	39.7586						33.0376
	34.0438				30.4804									36.8642	40.804						33.3104
	33.9863				30.4428									35.6612	42.5651						32.6434
	32.8345				30.4409									38.4933	41.9872						33.2184
	32.6396				30.2428									38.2487	42.2864						33.4287
	32.8702				30.2566									37.0136	42.9881						33.7005
	33.4646				30.5277									38.8812	41.4804						33.1434
	33.44				30.1706									37.6438	42.0222						32.8657
	33.0448				31.1103									37.4278	41.9006						32.1855
	33.672				30.5267									37.9132	40.6343						32.6255
	33.3391				29.9659									38.812	40.9131						33.054
	32.9372				30.1004									38.0687	42.228						34.0974
	32.9453				30.7577									37.4978	39.3525						33.1833
	33.3114				30.753									38.2295	41.1617						32.8209
	33.5319				30.0284									38.3707	41.3766						33.1139
	33.0119				29.8847									37.4957	40.9546						32.6298
	33.0062				30.4716									37.9217	41.7207						32.1971
	33.3419				30.3475									38.2899	41.0442						32.8826
	33.351				31.2258									38.7402	41.7414						33.7538
	33.6004				30.3059									37.9952	41.1602						33.6155
	33.2571				30.888									38.1151	40.8169						32.2463
	32.8223				32.0058									37.1504	41.7606						33.3528
	33.8888				30.3799									39.2676	42.9397						32.6205
	33.6349				30.6384									36.8222	41.5963						32.1545
	33.3171				30.3531									37.7587	40.7913						32.1982
	33.0353				30.9183									38.0184	38.4507						32.4308
	33.7774				30.0801									39.6321	38.6003						32.3138
	33.5923				30.135									37.8777	39.3386						32.5945
	33.6282				31.4153									38.1942	41.9647						33.2742
	33.68				30.7415									37.44	42.6108						33.2332
	33.4326				30.8729									36.9	42.6754						33.7444
	33.4311				29.6107									36.3639	42.676						32.7207
	33.2695				30.5961									36.3684	41.0206						32.0854
	32.8029				30.3914									38.0386	41.8852						32.6964
	33.6549				29.3332									37.1766	40.8902						32.285
	33.6633				30.9872									35.4317	40.2617						31.6135
	33.8987				31.1643									35.6906	41.6162						31.7965
	33.0443				30.3624									36.642	41.9812						32.5785
	32.8846													36.7971	40.9132						32.6223
	33.3619													37.896	41.4722						33.8477
	33.0474													36.2803	40.4885						34.2575
	34.7935													37.4631	40.5464						35.6916
	33.5722													35.4061	41.1029						34.382
	33.6685													35.9872	42.6794						32.7089
	34.9446													36.0642	39.57						32.5892
	33.221													35.7119	40.552						32.7488
	33.6683													36.5325	41.3775						33.2053
	33.3284													35.8032	40.9674						32.5934
	33.8239													36.7528	41.8081						32.8659
	32.538													35.4532	42.0828						32.7606
	33.2464													36.2255	40.4621						32.1668
	33.099													36.9538	42.2616						32.0559
	33.7282													35.5999	41.0544						32.3424
	33.1055													34.4947	42.9772						32.7339
	33.0617													36.4202	41.8717						33.2834
	33.3289													36.808	43.4216						32.8861
	33.4178													37.3996	41.1248						32.6028
	33.1039													36.2687	43.1757						33.2884
	33.1487													36.1005	42.556						33.8646
	32.972													35.1554	42.0116						33.2271
	33.2222													36.5373	40.9208						33.7765
	33.4968													35.8004	41.3427						32.2388
	33.0543													35.8436	38.823						32.8186
	33.6333													37.1823	42.0544						33.1801
	33.9264													37.7921	41.5875						33.8046
	32.8582													36.3655	41.2787						33.6693
	33.3949													35.9842	40.7406						34.3124
	33.1285													36.3787	41.2953						33.6195
	32.605													35.3566	41.8707						33.3742
	33.5631													36.5126	40.4247						33.5072
	33.5605													36.5799	42.0392						33.9457
	33.5787													37.5818	41.8043						33.1854
	33.5431													36.9418	40.9702						33.5065
	33.1686													37.7134	41.2335						34.0094
	33.9296													37.5439	41.3965						33.2508
	33.4885													37.5414	42.0967						33.5718
	33.6833													37.5345	41.2498						34.17
	32.5838													38.1423	40.461						33.3178
	33.5462													37.5914	40.797						33.276
	33.7527													36.6974	39.6956						33.3274
	33.0336													35.1269	40.3955						34.7117
	32.9241													35.3209	41.7928						33.4714
	32.9594													36.6501	42.7469						33.4769
	32.718													36.1031	41.9495						33.2357
	33.6718													36.3786	42.8023						33.6432
	33.5036													36.347	44.0931						33.2957
	33.8705													36.4324	43.9454						32.9307
	33.5225													36.51	43.6727						33.4951
	33.6848													35.8237	42.773						33.5949
	33.5545													36.5162	41.4885						33.6664
	33.9132													36.4971	41.2053						34.0855
	33.685													36.7215	40.962						33.4248
	32.9129													36.9077	41.2094						33.5627
	33.5476													36.2152	40.4336						34.2756
	33.7037													36.5407	41.157						34.0355
	33.0854													37.0965	41.5558						34.5259
	33.0099													36.5574	41.3647						33.5444
	33.3945													36.4595	41.5869						33.3207
	33.5735													37.1051	41.8001						33.1889
	33.1141													34.8957	40.714						33.6586
	33.3189													36.6453	40.1805						33.2068
	33.2016													36.2796	41.821						33.6274
	33.3531													36.7472	41.9189						33.8446
	33.4888													36.3169	42.641						33.5053
	33.955													35.4801	40.7389						33.5371
	33.3729													30.435	41.093						33.6983
	32.6877													31.593	42.1755						33.1923
	33.6666													37.1628	42.6983						32.5227
	33.5157													37.8783	42.7217						33.2487
	33.4783													36.3246	41.7508						32.1469
	32.5													37.1384	40.9369						33.5006
	33.6291													37.0114	41.4591						33.6748
	33.0205													37.7055	41.0018						34.0942
	34.1571													36.2935	41.3737						33.5887
	33.4631													37.996	40.1319						33.7136
	34.2018													37.3238	41.6876						33.4362
	33.4326													36.8228	42.4283						32.9703
	33.1603													36.0835	41.5453						34.1171
	33.3501													37.1566	41.1477						33.9027
	33.8722													37.2762	41.0222						32.4831
	34.1829													36.4182	41.2059						33.2186
	32.8613													35.8988	42.1175						33.9632
	33.1967													36.3279	41.411						33.9223
	33.4818													36.4303	41.1874						34.0052
	33.3111													37.5741	41.5453						32.847
	32.9658													37.5282	40.8871						33.4058
	32.7304													37.7989	41.5789						33.6447
	33.6372													37.2619	42.8729						33.8448
	33.7127													37.6176	44.9899						33.6829
	32.9023													37.9502	42.3987						32.8272
	33.3499													38.3643	41.9606						32.9627
	33.822													37.8906	42.2202						33.0974
	34.1527													37.8081	41.1132						32.5067
	33.6173													37.4115	42.3718						32.8119
	33.2362													37.6412	43.4135						32.6487
	33.366													37.2871	37.8236						33.3939
	33.4334													37.0013	40.4145						33.1201
	33.0232													37.1786	41.867						33.4496
	33.233													36.7429	41.4658						33.0951
	33.0337													37.5908	41.5448						33.5305
	33.9764													37.0468	41.3927						33.342
	33.7076													38.226	41.5685						32.2
	33.2861													37.6271	42.3179						31.4307
	33.1832													36.5199	40.6555						32.8276
	33.307													36.3965	42.2386						32.9228
	32.7138													39.0352	42.2892						32.0399
	32.966													36.7405	42.7009						32.8977
	33.3694													34.5425	42.5459						32.3374
	33.7444													36.7772	43.1085						32.2157
	33.4576													27.818	41.7915						32.4145
	33.4112													36.779	38.729						32.1278
	33.6723													35.8577	39.7723						32.2535
	32.9518													36.7354	41.6336						32.473
	33.2889													36.7069	41.4345						32.0931
	33.8429													37.4507	41.5729						32.806
	33.0152													36.338	40.9205						32.6465
	34.1961													35.981	40.7326						32.5239
	33.2976													35.8963	40.6352						32.5594
	33.6681													36.701	41.8783						32.6602
	33.3617													37.8292	41.2845						31.7303
	33.0371													37.8461	40.9324						32.1279
	33.4522													35.7894	41.6597						32.7899
	33.3698													36.3174	42.2922						32.3793
	33.911													35.5547	41.1429						32.7026
	33.9573													36.5796	41.5188						32.5914
	33.645													35.0057	41.019						32.4772
	33.3427													36.4734	40.8034						32.2906
	33.348													35.8871	41.1389						32.6381
	33.8065													35.2843	41.4289						32.7314
	33.2689													38.0487	39.9375						32.7398
	33.5208													36.2559	40.9033						32.5989
	33.1264													36.5064	40.468						32.7257
	33.7798													36.7286	44.2597						33.1163
	33.4593													35.6478	42.7833						32.0403
	33.6125													34.817	42.7897						31.8658
	33.4029													35.1295	41.4608						33.2066
	33.2939													36.073	40.6375						32.8532
	33.5348													36.7921	42.3745						32.3445
	32.9473													35.8916	41.1017						32.3423
	33.3271													36.3095	41.3594						32.4085
	33.8434													36.9018	40.1947						32.5479
	33.2811													35.7098	41.7534						33.13
	33.4683													37.1281	42.2209						32.3016
	32.7182													35.809	42.2562						32.9255
	32.4407													35.4758	42.7098						33.4604
	33.4493													34.2274	44.2586						33.3674
	33.2029													36.0081	44.3761						32.9694
	33.4145													36.2646	39.4557						32.4353
	33.6088													36.266	41.4971						33.0265
	32.796													37.8833	41.6231						33.0579
	33.6412													37.515	41.6492
	33.5693													35.2842	41.5599
	33.8563													35.7283	41.4375
	32.8578													34.859	39.9112
	33.3856													35.4796	40.7603
	32.4519													35.9496	43.2415
	33.7072													36.1988	42.7414
	33.2144													35.2348	41.9851
	33.5293													37.1579	41.4001
	33.5141													37.6329	41.6099
	33.7387													36.1288	40.9021
	33.7376													38.2535	41.6666
	34.196													37.5219	41.7238
	33.3506													35.6762	42.658
	33.0252													35.7484	42.6066
	34.0614													36.1413	41.3405
	32.7173													36.9937	40.8222
	33.9429													36.081	41.9817
	33.0527													36.374	41.2212
	33.1385													36.2995	40.1113
	33.0564													36.3514	40.5434
	33.3794													35.8228	42.7441
	33.9328													34.3469	42.4143
	33.3855													35.5011	42.9771
	33.4318													35.735	42.041
	33.8363													35.7389	39.4448
	32.7337													36.4143	42.8539
	33.287													36.3237	41.8663
	34.0426													35.3337	41.2822
	33.1877													35.2907	41.5384
	33.4108													35.9428	41.202
	33.7052													35.0007	43.1918
	33.2337													37.2242	40.2833
	33.2407													35.9198	39.8928
	33.6171													36.2633	38.9391
	33.1395													38.0677	39.9041
	33.3969													37.6446	41.331
	33.2469													36.2732	42.292
	33.3649													36.2759	41.2028
	32.8131													37.1365	48.3317
	33.4836													37.6312	42.6608
	33.3864													38.4864	41.3676
	33.631													38.0065	42.0532
	33.1847													31.8793	40.307
	32.9658													37.691	41.7674
	34.1188													38.9028	40.9209
	33.1138													38.5847	40.3351
	32.5558													37.807	41.2017
	33.4884													37.0607	41.0294
	33.0975													38.6769	41.7619
	33.6872													37.5092	41.0412
	32.7321													38.2686	40.6592
	33.7157													38.1671	42.0038
	33.2825													38.3566	39.0566
	33.1304													37.7491	41.0908
	33.0553													36.2898	41.6271
	33.2737													37.2756	40.5818
	33.2912													36.7059	40.9834
	33.0278													38.5639	40.2398
	32.9515													37.4618	41.2665
	33.0512													36.7204	41.4507
	33.2603													36.7232	42.0831
	33.4205													33.5657	42.5726
	33.6006													37.5133	42.6966
	33.2843													36.5266	41.3631
	33.8956													35.8054	41.5737
	33.5983													36.5237	40.9358
	33.3506													36.4919	40.8671
	33.1545													36.9315	41.1544
	33.6198													38.2302	41.2829
	33.1445													36.9649	41.3706
	33.5392													37.126	41.789
	32.7696													37.8342	40.9765
	33.3103													37.2075	41.2979
	33.6259													35.7144	40.7432
	33.6026													34.9564	39.6862
	32.3315													36.6165	41.3379
	33.6318													36.6599	41.1316
	33.4684													36.2774	41.6621
	33.4733													36.526	40.2921
	33.0864													36.732	40.4322
	33.3979													37.4023	41.0442
	33.8326													37.1462	42.5887
	32.7867													38.0085	41.6193
	33.7941													37.3741	41.0255
	32.9804													38.0331	40.7466
	32.8643													36.4517	41.136
	33.6609													36.8867	48.1203
	32.7948													36.0108	41.4065
	33.3308													36.809	40.377
	33.5258													37.1149	44.4951
	33.4428													36.2437	41.7025
	33.3482													36.2573	41.5078
	33.53													37.4559	41.1849
	33.1621													37.06	41.9514
	33.3143													36.9366	40.637
	33.2519													36.5649	40.7321
	32.9632													36.4012	39.8942
	33.3426													36.44	40.6011
	33.7974													36.0601	41.9412
	33.3518													35.9189	41.1529
	33.5722													36.3692	41.0836
	33.3794													36.63	41.8081
	33.8674													36.401	40.894
	33.5425													36.5782	40.9914
	32.969													37.463	41.8961
	34.0015													37.7223	39.4161
	32.7634													37.6199	42.9632
	33.2306													36.2456	42.8245
	33.6596													36.6579	42.5476
	33.3931													36.739	39.4797
	33.4668													36.0853	38.6801
	33.553													35.6881	41.1734
	33.3898													37.7328	38.6623
	33.6111													36.4276	39.5143
	33.0939													35.244	39.5784
	33.2437													35.6254	40.8243
	33.3285													36.6685	40.2088
	32.9104													35.7018	43.2166
	33.4017													35.7597	41.7022
	33.0074													35.9076	42.6401
	33.3184													37.0171	42.7504
	33.3767													36.6776	43.1513
	33.3758													37.0713	42.4541
	34.2651													34.7418	42.6529
	33.1084													35.2453	44.4291
	33.6911													37.5656	42.7709
	33.4273													35.4457	43.1176
	33.4383													36.4048	41.0445
	33.7961													36.9296	39.0978
	33.5922													36.1208	38.7412
	33.3534													33.8978	38.5854
	32.9375													39.9425	40.3651
	33.8674													36.9986	41.6628
	33.7401													37.6229	41.6908
	33.3829													36.0037	40.6731
	32.8081													35.6482	40.7376
	33.1686													36.5571	41.0094
	33.1391													37.7903	41.2437
	33.5788													36.6063	40.726
	33.1693													36.7752	40.0218
	33.8172													35.8065	40.4573
	33.7008													36.5549	42.2414
	33.6804													37.5161	42.2609
	33.4508													36.6389	41.5621
	33.4656													35.8283	42.0482
	33.5708													38.5045	41.7159
	34.3692													38.3525	41.8178
	33.9393													38.3	40.692
	34.0481													36.9161	40.4004
	33.8359													37.5116	40.928
	33.5949													37.2127	40.6117
	33.3588													39.0076	40.414
	33.9952													37.8361	40.6711
	33.1005													38.2137	41.0102
	32.8541													37.8857	41.2826
	33.2612													38.7243	41.4188
	34.1125													38.7498	41.2621
	33.315													37.4522	42.0465
	33.0929													37.5606	41.6534
	33.5375													38.0522	41.5891
	33.182													37.5466	42.5085
	33.8688													36.716	42.299
	33.5191													32.6374	41.5739
	33.2539													36.8792	41.1299
	32.6977													37.3292	40.9908
	33.1621													36.1916	41.0857
	33.071													35.9662	40.6762
	33.3312													35.1023	39.5726
	33.5911													35.8799	41.0912
	32.3759													37.1698	41.9725
	33.3228													36.0417	39.9116
	33.1762													38.2194	42.0564
	33.6466													36.4783	41.8908
	33.006													35.2893	38.5561
	33.3171													36.5572	39.7932
	33.419													35.0037	41.1107
	33.7786													36.0371	42.3232
	33.1163													36.2708	41.2316
	33.1757													36.9223	38.0488
	33.8114													35.2028	38.4345
	34.0118													34.9671	40.8127
	33.3232													35.878	41.8051
	32.8051													35.9529	43.0587
	34.0409													35.5867	42.4196
	33.4307													36.8278	42.3582
	33.8008													35.9011	41.4447
	33.9757													36.7819	42.1686
	33.0628													37.4181	41.8361
	33.2013													36.1219	37.8643
	33.5363													35.7867	41.0753
	33.5936													35.7672	42.8105
	33.7659													35.8778	43.6762
	33.2596													36.7407	42.4222
	33.0709													36.6478	44.5011
	33.1164													36.3335	39.688
	33.6783													36.9045	39.6248
	33.2054													36.6869	41.2006
	33.2259													36.8373	41.0536
	33.4585													36.9725	38.1804
	33.3414													35.4777	40.95
	32.7963													35.691	42.1508
	32.6655													35.921	42.0067
	32.5175													35.9117	42.581
	32.7024													36.542	40.841
	34.5498													38.268	39.6096
	33.3431													36.2413	39.9165
	33.3209													36.095	40.9672
	33.6709													36.3658	41.139
	33.5734													36.6877	40.2133
	33.0894													35.6416	39.5898
	33.3218													36.747	39.8766
	33.2446													36.8829	41.9875
	33.3492													37.7377	41.8596
	34.347													36.5244	41.978
	33.0385													36.3746	43.0893
	32.8018													36.1935	41.8669
	33.6388													36.2686	40.9781
	33.2049													35.8992	40.6323
	32.9599													36.1568	41.4777
	33.2233													37.2012	42.0696
	33.6252													36.2109	41.7265
	33.434													35.4719	41.1645
	33.1069													35.5102	42.0348
	33.6732													35.2147	41.2088
	33.0586													35.6941	42.1378
	32.8037													36.904	40.9791
	32.9518													36.4573	41.7579
	33.2864													36.7266	42.6058
	33.441													36.2004	41.24
	32.4795													37.1188	42.0912
	33.7149													37.3672	42.8857
	33.1433													38.6218	41.9306
	32.661													37.155	42.0233
	33.503													32.3342	41.4552
	33.1648													34.4981	41.9213
	34.3145													36.5046	38.2243
	33.6428													36.7895	42.0983
	33.5879													36.5839	42.685
	33.5577													36.4815	42.9442
	33.4761													36.833	41.6987
	32.7256													38.361	42.0736
	33.2514													36.1511	40.0289
	33.5887													37.5375	40.9778
	33.3629													38.7489	42.4636
	33.82													37.206	40.9453
	33.5588													37.9137	40.3311
	33.8515													38.2187	41.7927
	32.5897													38.2174	41.9739
	33.2454													36.5426	41.3184
	33.6424													36.4968	41.3226
	33.4543													36.0607	39.6534
	33.108													37.0037	40.7034
	33.5142													37.6284	41.0747
	32.8405													36.9523	40.6264
	33.3135													33.6658	39.9676
	33.59													36.2487	40.0007
	33.2809													36.8565	41.3813
	33.8366													36.9315	42.089
	33.3385													36.6433	40.0695
	32.9216													36.7593	41.6271
	32.7712													36.3119	41.8899
	32.5396													36.5774	42.7303
	33.1159													36.8814	39.3419
	33.4147													33.3878	40.5013
	33.4072													36.1592	41.2086
	33.3503													35.2585	40.3461
	33.3971													36.8688	41.029
	33.5835													37.3328	41.2227
	32.9683													37.4572	41.0621
	33.6936													37.7424	40.7691
	32.8852													38.0517	40.2839
	33.1562													38.2361	39.3428
	33.373													38.9707	40.8489
	32.8557													38.3738	40.3768
	33.3634													37.6666	42.1948
	33.7973													37.6307	41.8741
	33.2955													38.7267	41.9073
	33.2683													38.482	37.8959
	33.651													37.4742	41.7663
	33.9792													38.6683	41.2392
	33.2535													39.1959	42.6682
	33.2526													38.2579	43.1069
	33.4374													37.9487	41.9038
	33.6079													37.0516	40.9623
	33.3439													37.4474	41.7867
	33.3887													37.14	41.8702
	34.3027													39.079	41.7764
	33.4515													32.9482	40.3333
	34.1095													37.7826	41.3854
	33.3148													38.2245	43.334
	34.0006													36.1349	42.1694
	32.6381													36.6034	45.7959
	33.2621													36.6333	40.294
	33.3493													37.3698	40.3864
	33.2386													36.635	41.6638
	33.1836													32.038	41.3198
	33.7415													36.1146	41.0292
	32.4905													36.4654	41.755
	33.4234													36.2096	42.4997
	34.0018													36.0805	41.7132
	32.824													37.8694	41.7339
	33.06													34.8813	39.5125
	33.47													35.6461	38.9758
	33.2029													36.0444	38.0992
	33.1181													36.1112	41.6464
	33.275													35.9295	40.8627
	33.2224													35.2611	40.9832
	33.5676													35.9731	41.9596
	33.5496													38.3295	41.0332
	33.9													36.2783	40.2573
	32.9773													36.6657	41.8426
	33.0587													36.5294	42.5119
	33.8346													36.3538	42.2543
	33.5921													36.8696	41.6518
	33.3098													36.0589	41.1751
	31.8337													35.9764	41.0019
	33.4574													36.0764	42.0117
	32.9259													35.3597	41.9801
	32.7351													36.5553	42.3147
	32.8816													35.6459	42.5556
	33.6949													35.8249	42.2398
	33.2904													36.4734	41.3044
	34.2127													36.9575	41.811
	33.7635													36.8991	43.0699
	33.3486													38.2098	39.2785
	33.3384													38.638	38.9166
	33.2523													36.6144	41.9073
	33.4717													37.0071	39.9758
	34.3017													37.2154	41.0375
	33.0473													36.8324	38.7069
	33.4277													36.3652	42.7186
	34.309													37.1666	41.6835
	33.6366													36.2972	41.3567
	32.944													37.4136	41.4099
	33.8492													37.2247	42.3442
	33.2396													36.9768	42.6567
	32.8439													36.4642	42.2536
	33.2211													38.0426	38.3637
	33.5977													36.2683	38.611
	33.189													36.0528	38.9953
	33.6899													36.7136	42.2846
	32.5402													36.1269	40.4326
	34.0699													37.2017	42.0407
	33.412													37.0349	41.4553
	33.4845													37.5052	41.2137
	33.8427													36.7229	40.581
	34.0629													37.1123	40.2839
	33.6024													37.2425	41.7171
	32.8959													36.703	41.1712
	33.4394													36.3833	40.8104
	33.5902													36.3808	46.0677
	33.8354													36.7946	46.1975
	33.5296													35.8305	39.6193
	32.7216													36.905	40.0346
	33.0461													37.1177	37.9013
	34.5877													36.1249	41.72
	33.3037													35.4991	38.8207
	33.6774													36.9145	38.6813
	33.0412													36.5463	42.0936
	33.2322													37.428	44.5519
	33.1098													36.6393	42.7179
	33.3893													37.8919	43.1933
	33.9615													37.6533	41.8941
	33.524													37.3286	42.0457
	33.5935													37.6098	40.8013
	33.6121													36.9157	42.1224
	33.0785													36.9614	43.0949
	33.8495													37.4132	39.2311
	34.7084													33.1307	38.5069
	34.3637													32.6862	39.6229
	33.5443													36.4564	41.1769
	34.1933													36.8772	42.6668
	32.8825													36.233	42.1469
	33.7977													38.3176	41.6459
	33.6429													37.9063	41.3768
	33.4734													38.0258	41.2206
	33.2896													37.5248	41.6336
	33.4373													38.7911	41.307
	33.384													37.3608	40.1425
	33.555													38.894	40.7163
	32.5782													38.9696	40.2229
	33.2763													38.8355	42.6868
	33.5862													40.3843	41.8517
	33.8351													39.8208	41.5473
	33.313													38.4592	41.494
	34.0314													39.5199	41.8907
	33.6584													38.0042	40.4714
	33.4014													37.6805	41.1172
	34.4869													37.3368	41.0998
	33.4626													38.313	40.8807
	33.7716													37.3835	41.2975
	33.4368													38.283	41.7145
	33.6368													36.9457	40.6389
	33.4804													35.4508	39.5998
	33.681													35.9547	40.1725
	33.3827													36.1516	41.2935
	32.9986													37.0473	37.6959
	33.5869													36.6938	38.1882
	33.0173													36.1515	39.905
	34.293													35.4719	41.3852
	33.4362													36.0082	41.0098
	33.5926													35.8236	41.5187
	33.3652													36.483	40.632
	33.3069													35.9806	41.1529
	33.353													36.1896	41.8396
	32.94													36.4582	40.8873
	32.7103													36.3411	40.6999
	32.8854													35.7482	40.846
	33.1883													36.3892	40.7019
	33.5488													36.9881	42.2876
	33.4705													36.7758	41.6889
	33.8745													38.8676	41.5143
	32.9712													37.3524	42.2478
	33.0169													37.1346	41.8151
	34.5973													35.6124	38.2177
	33.2906													37.2865	39.3188
	33.4556													38.0872	41.5161
	33.5073													37.3519	40.8639
	33.6343													36.1659	41.035
	33.4995													31.8522	39.7298
	33.4944													37.8728	41.6622
	33.3125													38.2225	41.1492
	33.459													36.8648	40.6367
	32.8062													36.0085	40.585
	33.1143													38.8854	40.5143
	33.5513													36.7784	40.2291
	33.4513													37.8684	40.9564
	33.5713													36.5843	41.567
	33.5083													36.9521	39.3522
	33.8491													37.499	39.9484
	33.1508													37.709	39.5872
	33.5427													35.75	38.7557
	33.1559													37.2454	41.1634
	33.5085													37.6604	39.6405
	33.4038													36.159	38.2327
	33.6572													37.2393	38.6741
	32.9121													35.7147	40.432
	35.9876													37.1444	40.7726
	33.5258													36.8554	41.737
	33.4211													36.5847	37.016
	33.7665													36.3279	40.2269
	33.5583													35.3782	43.4885
	33.1178													36.2808	39.9873
	34.7185													36.1579	39.8371
	33.9626													35.5438	37.7388
	33.3634													41.2282	38.6625
	33.6676													37.8046	39.7855
	33.0226													35.765	39.6636
	33.0264													38.3543	40.5981
	33.5157													36.543	40.0984
	34.3053													37.497	41.5621
	33.5258													36.427	38.5429
	33.3798														42.3245
	33.25														41.7596
	32.662														41.3349
	32.6592														41.5005
	33.3178														42.6216
	34.1863														41.0813
	33.459														38.637
	33.1949														39.6135
	32.4129														39.4266
	32.7806														39.612
	33.5627														42.8381
	33.2909														42.2123
	33.7032														39.2641
	32.9911														42.6529
	33.562														40.0822
	33.8891														42.3106
	33.5105														41.6591
	33.2893														41.6784
	33.3195														37.5969
	32.9647														38.5503
	33.4985														39.3252
	33.723														37.8479
	33.2258														39.2961
	32.9818														40.509
	33.4763														41.9883
	33.837														41.2813
	32.9307														38.9947
	33.9617														40.4603
	33.4812														44.1389
	33.8337														42.5164
	35.5853														43.8419
	33.0026														42.1069
	33.2893														40.2119
	33.2456														41.3172
	33.6094														42.0779
	33.7702														40.7748
	33.2259														39.1335
	33.1648														38.7327
	32.9268														40.6294
	33.4078														40.8789
	33.1743														41.2057
	33.3098														40.8288
	33.5657														41.2923
	33.5211														41.2955
	33.503														41.0109
	33.7565														41.3579
	33.2689														37.7856
	32.7372														40.819
	33.7931														42.2296
	33.4871														42.3224
	33.357														40.8586
	33.5648														40.9496
	32.854														41.371
	33.6299														40.2356
	32.9216														41.037
	34.3027														41.7508
	32.676														41.6055
	33.18														41.0947
	32.4198														41.3742
	33.347														38.6125
	33.1638														41.9098
	33.7021														42.0953
	33.1813														41.974
	33.1854														42.0811
	33.6693														41.621
	33.3631														42.0602
	32.8076														42.547
	33.6854														42.6752
	33.0196														39.9011
	34.0006														39.9062
	32.86														39.4866
	33.9388														39.8761
	33.0491														39.2841
	33.3188														40.4771
	33.6285														41.2064
	33.7184														41.9573
	33.1886														43.3323
	33.9351														41.7384
	33.0679														39.4618
	33.6616														38.8456
	32.9367														38.6338
	33.7576														41.2039
	33.7137														42.3312
	32.7023														40.5654
	33.3145														39.1768
	32.9798														41.8513
	33.1335														39.5478
	33.0904														40.2246
	33.4496														41.7518
	32.5253														40.185
	33.7315														38.0675
	33.2575														39.9648
	33.4547														42.8616
	32.5923														40.4113
	33.3538														41.7106
	32.8578														41.416
	33.9198														41.2064
	33.0346														41.3012
	33.4944														40.2565
	33.789														39.4404
	33.826														41.7429
	33.8688														42.3134
	33.4553														41.0394
	32.7533														38.4297
	33.0129														39.5369
	33.4871														38.6843
	33.7416														41.3217
	33.7043														40.8469
	33.7615														42.4586
	33.1352														41.9606
	33.3633														42.3682
	32.9205														42.038
	33.5335														40.6876
	33.2133														40.6859
	33.301														40.6211
	33.6421														40.6627
	33.9168														39.799
	33.1263														42.0715
	32.8506														38.9236
	32.8674														36.9279
	33.2592														39.2881
	33.509														42.337
	33.8071														37.6339
	33.5737														40.1384
	33.0909														42.1753
	33.018														41.7151
	33.6035														40.7498
	32.6497														42.7388
	33.5605														41.6957
	33.7818														41.1032
	33.4326														42.0474
	33.1545														42.337
	33.0225														41.0977
	33.5821														41.9724
	32.9351														42.5432
	33.7818														40.724
	33.1821														41.4671
	33.7183														39.2959
	33.5029														35.5705
	33.0493														44.306
	33.0418														42.8177
	33.7447														41.2762
	34.1937														41.545
	34.1062														41.0897
	33.3625														41.5724
	33.0451														41.6444
	33.2163														41.3275
	33.3068														40.7985
	32.8239														38.8756
	33.24														40.7902
	33.7803														40.8907
	33.7067														40.8242
	33.9828														39.7582
	33.0484														39.4079
	33.8655														39.6482
	33.31														40.9258
	32.8533														41.8328
	33.3729														41.99
	33.4702														41.9903
	33.4612														41.5947
	33.6075														41.5066
	33.2025														40.2641
	33.1586														39.7969
	33.3161														40.3002
	33.1174														41.0283
	33.4317														40.8266
	33.3219														42.4276
	32.8979														43.8221
	33.19														42.6784
	33.1435														38.5698
	33.428														38.4614
	33.5323														42.1919
	32.8073														41.6612
	32.35														40.2892
	33.6134														40.6247
	33.1372														41.0735
	32.8885														40.83
	33.6306														41.559
	33.1232														41.4091
	34.0717														41.1655
	33.8881														41.1197
	33.3275														38.0374
	34.0274														39.12
	32.6684														39.6117
	32.7895														40.9268
	33.1651														41.3546
	33.6051														42.0208
	33.9719														45.6448
	33.3943														46.8394
	33.2366														42.3096
	33.2386														41.4216
	33.1891														41.4726
	33.5545														42.1721
	33.0055														41.8554
	33.5027														39.9584
	33.5946														42.0603
	33.4594														40.8275
	33.5107														39.7684
	33.2817														41.4038
	33.9236														40.5864
	33.7151														41.1271
	33.4291														40.1093
	33.3457														42.1414
	33.3497														40.0841
	33.4594														41.5683
	33.7749														41.3283
	33.4002														41.0406
	33.3965														39.8273
	33.1071														42.649
	33.5619														42.5079
	33.4924														41.9624
	33.8081														41.3444
	33.3295														42.1678
	33.1352														41.5844
	33.3061														40.9763
	33.3896														40.8459
	33.2953														40.3208
	33.6087														41.3617
	33.4162														42.4804
	32.5499														42.1462
	32.769														41.6799
	33.2359														42.3503
	33.1646														41.8448
	33.7075														40.6817
	33.2752														41.393
	33.6112														41.3885
	33.1304														41.296
	33.5252														41.6316
	33.338														42.1666
	32.6515														41.0524
	33.2488														40.9443
	33.8859														40.7941
	33.0347														39.0624
	32.27														37.9619
	33.5288														40.9363
	33.9552														41.8037
	33.0592														42.2046
	33.165														40.5961
	33.1012														41.6233
	33.3711														38.2921
	33.7831														37.6815
	32.9405														39.8021
	33.1458														40.4747
	32.8794														37.7075
	33.0571														40.6137
	33.5061														38.9006
	33.4643														41.2698
	33.0458														41.8089
	33.5099														41.2704
	33.075														40.5732
	33.1326														41.3132
	33.3135														41.3766
	33.5428														39.748
	32.6901														39.2505
	33.3405														43.2632
	33.1688														41.4959
	33.3011														42.5891
	33.1522														40.5594
	33.2118														40.4446
	33.1633														37.6826
	33.7749														39.2201
	33.6343														42.1335
	32.9243														40.9731
	33.0896														41.7474
	33.6644														40.6355
	33.9401														41.2012
	33.0396														42.2898
	33.4458														40.4791
	33.3875														41.2889
	33.2564														41.3901
	32.9461														40.3957
	33.1416														41.7596
	33.4055														40.5836
	33.8542														41.2049
	33.2992														41.1053
	33.1572														41.6665
	33.0288														39.8588
[truncated: 6,991 more rows]

## Sheet: Fig. 2Aii
>OU611927.1 Harmonia axyridis genome assembly, chromosome: 1	34.5438
>OU611928.1 Harmonia axyridis genome assembly, chromosome: 2	34.8036
>OU611929.1 Harmonia axyridis genome assembly, chromosome: 3	35.0182
>OU611930.1 Harmonia axyridis genome assembly, chromosome: 4	34.752
>OU611931.1 Harmonia axyridis genome assembly, chromosome: 5	35.1099
>OU611932.1 Harmonia axyridis genome assembly, chromosome: 6	35.053
>OU611934.1 Harmonia axyridis genome assembly, chromosome: 7	35.1313
>OU611933.1 Harmonia axyridis genome assembly, chromosome: X	37.9641
>CM037132.1 Folsomia candida isolate DK chromosome 1, whole genome shotgun sequence	37.439
>CM037133.1 Folsomia candida isolate DK chromosome 2, whole genome shotgun sequence	37.4214
>CM037134.1 Folsomia candida isolate DK chromosome 3, whole genome shotgun sequence	37.5903
>CM037135.1 Folsomia candida isolate DK chromosome 4, whole genome shotgun sequence	37.3926
>CM037136.1 Folsomia candida isolate DK chromosome 5, whole genome shotgun sequence	36.4822
>CM037137.1 Folsomia candida isolate DK chromosome 6, whole genome shotgun sequence	36.9811
>CM037138.1 Folsomia candida isolate DK chromosome 7, whole genome shotgun sequence	38.594
>CP023339.1 Drosophila melanogaster strain rover (forR) chromosome 2L	41.8612
>CP023338.1 Drosophila melanogaster strain rover (forR) chromosome 2R	43.2985
>CP023337.1 Drosophila melanogaster strain rover (forR) chromosome 3L	41.9513
>CP023336.1 Drosophila melanogaster strain rover (forR) chromosome 3R	42.9179
>CP023340.1 Drosophila melanogaster strain rover (forR) chromosome 4	35.4926
>CP023335.1 Drosophila melanogaster strain rover (forR) chromosome X	42.5155
>CM037031.1 Schizaphis graminum isolate BZ-2018 chromosome 1, whole genome shotgun sequence	27.6395
>CM037032.1 Schizaphis graminum isolate BZ-2018 chromosome 2, whole genome shotgun sequence	27.6145
>CM037033.1 Schizaphis graminum isolate BZ-2018 chromosome 3, whole genome shotgun sequence	27.8457
>CM037034.1 Schizaphis graminum isolate BZ-2018 chromosome 4, whole genome shotgun sequence	27.5259
>CM037035.1 Schizaphis graminum isolate BZ-2018 chromosome 5, whole genome shotgun sequence	30.0292
>CM037036.1 Schizaphis graminum isolate BZ-2018 chromosome 6, whole genome shotgun sequence	29.8695
>CM026521.1 Aphidius gifuensis isolate YNYX2018 linkage group LG1, whole genome shotgun sequence	26.2881
>CM026522.1 Aphidius gifuensis isolate YNYX2018 linkage group LG2, whole genome shotgun sequence	26.8753
>CM026523.1 Aphidius gifuensis isolate YNYX2018 linkage group LG3, whole genome shotgun sequence	26.3177
>CM026524.1 Aphidius gifuensis isolate YNYX2018 linkage group LG4, whole genome shotgun sequence	26.3084
>CM026525.1 Aphidius gifuensis isolate YNYX2018 linkage group LG5, whole genome shotgun sequence	26.2546
>CM026526.1 Aphidius gifuensis isolate YNYX2018 linkage group LG6, whole genome shotgun sequence	26.713
>LR990257.1 Aricia agestis genome assembly, chromosome: 1	37.0259
>LR990258.1 Aricia agestis genome assembly, chromosome: 2	36.9579
>LR990259.1 Aricia agestis genome assembly, chromosome: 3	36.772
>LR990260.1 Aricia agestis genome assembly, chromosome: 4	36.8662
>LR990261.1 Aricia agestis genome assembly, chromosome: 5	36.6002
>LR990262.1 Aricia agestis genome assembly, chromosome: 6	36.9196
>LR990263.1 Aricia agestis genome assembly, chromosome: 7	36.7415
>LR990264.1 Aricia agestis genome assembly, chromosome: 8	36.9509
>LR990265.1 Aricia agestis genome assembly, chromosome: 9	36.8785
>LR990266.1 Aricia agestis genome assembly, chromosome: 10	36.4087
>LR990267.1 Aricia agestis genome assembly, chromosome: 11	37.0137
>LR990268.1 Aricia agestis genome assembly, chromosome: 12	37.117
>LR990269.1 Aricia agestis genome assembly, chromosome: 13	36.9097
>LR990270.1 Aricia agestis genome assembly, chromosome: 14	36.5333
>LR990271.1 Aricia agestis genome assembly, chromosome: 15	36.956
>LR990272.1 Aricia agestis genome assembly, chromosome: 16	36.6697
>LR990273.1 Aricia agestis genome assembly, chromosome: 17	36.8039
>LR990274.1 Aricia agestis genome assembly, chromosome: 18	37.0641
>LR990275.1 Aricia agestis genome assembly, chromosome: 19	37.4416
>LR990276.1 Aricia agestis genome assembly, chromosome: 20	37.3323
>LR990277.1 Aricia agestis genome assembly, chromosome: 21	37.6574
>LR990278.1 Aricia agestis genome assembly, chromosome: 22	37.9131
>LR990256.1 Aricia agestis genome assembly, chromosome: Z	36.1561
>FR997754.1 Chrysoperla carnea genome assembly, chromosome: 1	29.1262
>FR997755.1 Chrysoperla carnea genome assembly, chromosome: 2	29.0109
>FR997756.1 Chrysoperla carnea genome assembly, chromosome: 3	28.859
>FR997757.1 Chrysoperla carnea genome assembly, chromosome: 4	28.7984
>FR997758.1 Chrysoperla carnea genome assembly, chromosome: 5	29.1663
>FR997759.1 Chrysoperla carnea genome assembly, chromosome: X	31.0907
>OV121100.1 Ischnura elegans genome assembly, chromosome: 1	38.8952
>OV121101.1 Ischnura elegans genome assembly, chromosome: 2	38.4766
>OV121102.1 Ischnura elegans genome assembly, chromosome: 3	38.8069
>OV121103.1 Ischnura elegans genome assembly, chromosome: 4	38.514
>OV121104.1 Ischnura elegans genome assembly, chromosome: 5	38.4954
>OV121105.1 Ischnura elegans genome assembly, chromosome: 6	38.4944
>OV121107.1 Ischnura elegans genome assembly, chromosome: 7	38.4552
>OV121108.1 Ischnura elegans genome assembly, chromosome: 8	38.437
>OV121109.1 Ischnura elegans genome assembly, chromosome: 9	38.3116
>OV121110.1 Ischnura elegans genome assembly, chromosome: 10	38.0713
>OV121111.1 Ischnura elegans genome assembly, chromosome: 11	38.3729
>OV121112.1 Ischnura elegans genome assembly, chromosome: 12	38.1755
>OV121113.1 Ischnura elegans genome assembly, chromosome: 13	38.0059
>OV121106.1 Ischnura elegans genome assembly, chromosome: X	38.6182
>CM038234.1 Schistocerca americana isolate TAMUIC-IGC-003095 chromosome 1, whole genome shotgun sequence	42.3002
>CM038235.1 Schistocerca americana isolate TAMUIC-IGC-003095 chromosome 2, whole genome shotgun sequence	42.2246
>CM038236.1 Schistocerca americana isolate TAMUIC-IGC-003095 chromosome 3, whole genome shotgun sequence	42.2949
>CM038237.1 Schistocerca americana isolate TAMUIC-IGC-003095 chromosome 4, whole genome shotgun sequence	42.3292
>CM038238.1 Schistocerca americana isolate TAMUIC-IGC-003095 chromosome 5, whole genome shotgun sequence	42.2912
>CM038239.1 Schistocerca americana isolate TAMUIC-IGC-003095 chromosome 6, whole genome shotgun sequence	42.3203
>CM038240.1 Schistocerca americana isolate TAMUIC-IGC-003095 chromosome 7, whole genome shotgun sequence	42.3234
>CM038241.1 Schistocerca americana isolate TAMUIC-IGC-003095 chromosome 8, whole genome shotgun sequence	42.756
>CM038242.1 Schistocerca americana isolate TAMUIC-IGC-003095 chromosome 9, whole genome shotgun sequence	42.6383
>CM038243.1 Schistocerca americana isolate TAMUIC-IGC-003095 chromosome 10, whole genome shotgun sequence	42.3354
>CM038244.1 Schistocerca americana isolate TAMUIC-IGC-003095 chromosome 11, whole genome shotgun sequence	42.4603
>CM038245.1 Schistocerca americana isolate TAMUIC-IGC-003095 chromosome X, whole genome shotgun sequence	42.1279
>CM009472.1 Timema cristinae isolate 15_0190+16_0359 chromosome LG1, whole genome shotgun sequence	34.3896
>CM009477.1 Timema cristinae isolate 15_0190+16_0359 chromosome LG2, whole genome shotgun sequence	34.7062
>CM009478.1 Timema cristinae isolate 15_0190+16_0359 chromosome LG3, whole genome shotgun sequence	34.5209
>CM009479.1 Timema cristinae isolate 15_0190+16_0359 chromosome LG4, whole genome shotgun sequence	34.1033
>CM009480.1 Timema cristinae isolate 15_0190+16_0359 chromosome LG5, whole genome shotgun sequence	34.5736
>CM009481.1 Timema cristinae isolate 15_0190+16_0359 chromosome LG6, whole genome shotgun sequence	34.83
>CM009482.1 Timema cristinae isolate 15_0190+16_0359 chromosome LG7, whole genome shotgun sequence	34.9329
>CM009483.1 Timema cristinae isolate 15_0190+16_0359 chromosome LG8, whole genome shotgun sequence	34.5031
>CM009484.1 Timema cristinae isolate 15_0190+16_0359 chromosome LG9, whole genome shotgun sequence	34.5985
>CM009473.1 Timema cristinae isolate 15_0190+16_0359 chromosome LG10, whole genome shotgun sequence	34.5526
>CM009474.1 Timema cristinae isolate 15_0190+16_0359 chromosome LG11, whole genome shotgun sequence	34.8269
>CM009475.1 Timema cristinae isolate 15_0190+16_0359 chromosome LG12, whole genome shotgun sequence	34.7132
>CM009476.1 Timema cristinae isolate 15_0190+16_0359 chromosome LG13, whole genome shotgun sequence	34.8249
>OU015462.1 Brachyptera putata genome assembly, chromosome: 1	35.6655
>OU015463.1 Brachyptera putata genome assembly, chromosome: 2	36.3678
>OU015464.1 Brachyptera putata genome assembly, chromosome: 3	36.0711
>OU015465.1 Brachyptera putata genome assembly, chromosome: 4	36.8003
>OU015466.1 Brachyptera putata genome assembly, chromosome: 5	36.0375
>OU015467.1 Brachyptera putata genome assembly, chromosome: 6	36.0675
>OU015468.1 Brachyptera putata genome assembly, chromosome: 7	36.3215
>OU015469.1 Brachyptera putata genome assembly, chromosome: 8	36.8473
>OU015470.1 Brachyptera putata genome assembly, chromosome: 9	36.4014
>OU015471.1 Brachyptera putata genome assembly, chromosome: 10	36.9809
>OU015472.1 Brachyptera putata genome assembly, chromosome: 11	37.5014
>OU015473.1 Brachyptera putata genome assembly, chromosome: 12	37.4227
>OU015474.1 Brachyptera putata genome assembly, chromosome: 13	37.9196
>OU015475.1 Brachyptera putata genome assembly, chromosome: 14	38.0897
>OU830592.1 Limnephilus lunatus genome assembly, chromosome: 1	34.886
>OU830593.1 Limnephilus lunatus genome assembly, chromosome: 2	34.9776
>OU830594.1 Limnephilus lunatus genome assembly, chromosome: 3	35.0458
>OU830595.1 Limnephilus lunatus genome assembly, chromosome: 4	35.0562
>OU830596.1 Limnephilus lunatus genome assembly, chromosome: 5	35.2992
>OU830597.1 Limnephilus lunatus genome assembly, chromosome: 6	34.9783
>OU830598.1 Limnephilus lunatus genome assembly, chromosome: 7	34.8986
>OU830599.1 Limnephilus lunatus genome assembly, chromosome: 8	34.9602
>OU830600.1 Limnephilus lunatus genome assembly, chromosome: 9	35.0376
>OU830601.1 Limnephilus lunatus genome assembly, chromosome: 10	34.7127
>OU830602.1 Limnephilus lunatus genome assembly, chromosome: 11	34.9712
>OU830603.1 Limnephilus lunatus genome assembly, chromosome: 12	35.5349
>OU830604.1 Limnephilus lunatus genome assembly, chromosome: Z	34.7205

## Sheet: Figs. 2B and S8A
Pediculus humanus corporis											Periplaneta americana											Harmonia axyridis											Folsomia candida											Anisolabis maritima
AA+TT	AC+GT	AG+CT	AT	CA+TG	CC+GG	CG	GA+TC	GC	TA		AA+TT	AC+GT	AG+CT	AT	CA+TG	CC+GG	CG	GA+TC	GC	TA		AA+TT	AC+GT	AG+CT	AT	CA+TG	CC+GG	CG	GA+TC	GC	TA		AA+TT	AC+GT	AG+CT	AT	CA+TG	CC+GG	CG	GA+TC	GC	TA		AA+TT	AC+GT	AG+CT	AT	CA+TG	CC+GG
34.9719	8.40352	7.38749	11.0655	8.89676	5.20888	2.80685	10.0693	1.7125	9.47728		22.0715	11.2495	10.9853	9.86228	12.631	6.6358	2.85758	11.497	3.29283	8.91731		24.0884	10.2188	10.4167	9.64651	12.237	7.20091	3.0642	12.6978	2.9327	7.49691		23.5373	10.7856	9.47253	9.58942	12.5473	8.28377	3.36121	11.1316	3.41255	7.87874		28.2965	8.55472	8.71744	11.9155	12.2457	5.45599
35.6328	8.40387	7.2141	10.4653	8.31395	5.54267	3.37444	10.5248	1.67409	8.85397		22.4909	11.1495	11.0387	9.87123	12.7161	6.52944	2.64714	11.4387	3.23007	8.88815		23.7939	10.2881	10.3003	9.76861	12.6448	6.95791	3.0887	12.6806	3.0769	7.40011		23.5754	10.8228	9.62788	9.6712	12.7795	7.89858	3.16277	11.2516	3.32924	7.88108		27.2909	8.61018	9.35721	11.0662	11.6541	6.51752
35.4517	8.53185	7.28437	10.7312	8.90211	5.32777	2.87827	10.0029	1.70368	9.18623		22.3438	11.2077	10.9413	9.96857	12.5743	6.46655	2.79369	11.3769	3.2592	9.06787		23.2192	10.3596	10.3457	9.56741	12.7021	7.37951	3.2566	12.7011	3.2502	7.21851		23.3233	10.6889	9.72257	9.6029	12.6476	8.16353	3.26277	11.3009	3.45309	7.83443		28.9462	7.99337	9.78593	11.3548	10.2262	6.29911
36.2024	8.24199	7.31292	10.3417	8.23227	5.53756	3.23868	10.5293	1.62589	8.73727		22.6829	11.0996	11.062	9.88821	12.3222	6.49734	2.74886	11.4595	3.16093	9.0785		23.6075	10.2892	10.3925	9.68301	12.7694	7.08671	3.048	12.7025	3.1331	7.28801		23.1401	10.7978	9.67971	9.76891	12.8127	7.96931	3.1914	11.3156	3.3809	7.94351		29.3128	7.98337	9.78662	11.5107	10.076	6.10061
34.9776	8.59461	7.04347	10.7388	8.53983	5.45262	3.43518	10.4513	1.70389	9.06275		22.1498	11.1163	11.1892	9.94272	12.6559	6.57166	2.62164	11.5683	3.20183	8.98269		24.0947	10.1659	10.1892	9.97921	12.7626	6.77701	2.9315	12.4723	3.0883	7.53921		23.3196	10.844	9.64145	9.46701	12.61	8.14655	3.43139	11.3989	3.43569	7.70536		29.9927	7.75056	9.57715	11.9212	9.97937	5.74507
36.6869	8.31725	6.76842	10.9616	8.35535	5.01863	3.08072	9.85921	1.55468	9.39732		22.11	11.2638	11.0432	9.884	12.5059	6.63765	2.81415	11.407	3.25304	9.08123		24.1847	9.98691	10.0449	10.1578	12.4491	6.71821	3.1278	12.5463	3.1082	7.67601		23.4481	10.8654	9.6024	9.63712	12.6506	7.90928	3.32401	11.1304	3.45259	7.98012		29.0074	8.26277	9.81041	11.6054	10.4223	5.77694
35.5096	8.23152	7.09793	11.4719	8.81658	4.97834	2.66224	9.6063	1.70028	9.9253		22.316	11.2121	11.1707	9.70246	12.8271	6.68705	2.60559	11.3307	3.33338	8.81496		23.7712	10.0464	9.75831	10.1053	12.2774	7.09181	3.5429	12.6275	3.2238	7.55531		23.4409	10.882	9.55675	9.69011	12.7507	7.96921	3.2317	11.23	3.32944	7.91909		28.9809	8.20019	9.85543	11.5278	10.2325	5.9752
36.9192	8.07395	6.82755	11.5286	8.509	4.78874	2.49938	9.16054	1.55035	10.1427		22.562	11.203	11.0463	9.84549	13.1703	6.48365	2.39907	11.3517	3.22963	8.70885		25.0017	9.87061	9.77971	10.6454	12.4069	6.33231	2.7691	12.273	2.7906	8.13061		23.4963	10.8054	9.60064	9.58134	12.6378	8.13864	3.27886	11.1802	3.40529	7.87559		28.974	8.2235	9.84152	11.5989	10.3308	5.83373
36.3185	8.14493	7.14147	10.9203	8.30778	5.24254	2.93197	10.0593	1.55375	9.37938		22.2668	11.1584	11.0967	9.91842	12.906	6.55576	2.54169	11.423	3.25185	8.88139		23.6431	10.0572	10.2589	10.1285	12.6128	6.71981	3.0961	12.8656	3.0706	7.54731		23.7064	10.7741	9.50751	9.69471	12.6018	7.87701	3.3181	11.25	3.3607	7.90961		30.3373	7.69859	9.48362	11.9659	9.81475	5.73104
35.8513	8.40468	6.93362	11.1172	8.60529	5.10824	2.96484	9.74187	1.66138	9.61159		22.2523	11.3266	10.9598	9.86272	12.9904	6.55681	2.61413	11.2898	3.28098	8.86652		23.7277	9.98791	10.2195	10.1601	12.5301	6.74121	3.1269	12.9067	3.0544	7.54541		23.6277	10.7297	9.5667	9.66718	12.61	7.9442	3.31016	11.2607	3.40344	7.88024		29.2357	7.94138	9.85763	11.5607	10.1557	5.97394
35.7421	8.54282	7.06125	10.6522	8.44615	5.16088	3.34091	10.344	1.65108	9.05861		22.2984	11.2038	10.9658	9.80269	12.7698	6.75509	2.7185	11.2622	3.35309	8.87072		24.25	9.94621	10.1182	10.4117	12.6942	6.41331	2.8182	12.7313	2.8857	7.73111		23.5998	10.8935	9.43861	9.64841	12.5722	7.93891	3.4108	11.1977	3.3706	7.92941		28.5515	8.16125	9.74585	11.4397	10.3253	6.21352
36.9534	7.96892	7.47835	11.0453	8.56242	4.70778	2.38066	9.63474	1.59907	9.66936		21.8082	11.0997	11.4633	9.70812	13.72	6.77679	2.12603	11.5021	3.41658	8.37919		24.1438	10.0723	10.2593	10.2478	12.7091	6.42781	2.8163	12.7202	2.9043	7.69901		23.5553	10.8734	9.40639	9.69111	12.6182	8.04854	3.35485	11.1184	3.37126	7.96261		29.7908	7.7529	9.82167	11.6834	9.79376	5.99017
35.4932	8.45095	6.85966	11.2398	8.67205	5.09451	3.04608	9.85242	1.65995	9.63142		22.5843	11.2434	10.8562	9.96949	12.6296	6.47346	2.70903	11.257	3.20191	9.0756		24.3557	9.89971	10.1162	10.4911	12.6687	6.33411	2.7635	12.7506	2.8309	7.78941		23.452	10.8427	9.58141	9.59101	12.5781	8.05741	3.3624	11.3087	3.3665	7.85971		29.7171	7.92007	9.74643	11.6697	10.0007	5.8454
35.154	8.56474	6.89726	11.0309	8.75395	5.27878	3.19658	10.1351	1.67209	9.31658		22.1177	11.1464	11.1046	9.91648	12.7757	6.54122	2.68832	11.6117	3.24928	8.84857		24.2201	9.96001	10.2067	10.3851	12.6233	6.42601	2.7935	12.7967	2.8301	7.75841		23.5405	10.8085	9.47261	9.67545	12.5806	7.9261	3.42409	11.3798	3.35668	7.83568		29.4317	7.85067	9.72223	11.6071	9.98044	6.13891
35.9728	8.33919	6.86794	11.1808	8.48563	5.05794	3.02387	9.83846	1.61188	9.62145		22.6068	11.0509	11.0999	9.91746	12.8057	6.54517	2.47803	11.5066	3.15235	8.83712		25.9291	9.48061	10.1781	10.1163	11.1548	6.63661	3.105	13.2431	2.4096	7.74671		23.4624	10.8189	9.55003	9.73857	12.6431	7.8995	3.29937	11.1653	3.40389	8.01902		27.7136	8.19334	9.86007	11.0754	10.3458	6.78983
35.5145	8.47358	7.08706	10.9593	8.64407	5.22915	3.02267	9.97471	1.66394	9.43103		22.0371	11.3896	11.3683	9.62684	14.0135	6.55078	2.00959	11.2428	3.38419	8.3773		25.4179	9.71761	9.93491	10.7769	12.4682	5.98531	2.4937	12.2646	2.7041	8.23671		23.7652	10.8023	9.48464	9.75375	12.5274	7.76715	3.33058	11.1627	3.354	8.05228		29.4815	8.00681	9.80087	11.5987	10.1307	5.87172
37.249	8.13886	6.94083	10.7878	8.02155	5.05765	3.03828	9.88915	1.50558	9.37134		21.9009	11.3944	11.197	9.60433	13.2106	6.72894	2.58147	11.2952	3.44054	8.64666		24.3491	9.90801	10.0271	10.3822	12.5376	6.49481	2.9459	12.6896	2.9294	7.73621		23.5825	10.7926	9.48412	9.79035	12.5758	7.84536	3.32734	11.211	3.35545	8.03544		29.5094	7.92165	9.75354	11.7256	9.98427	5.95764
36.5756	8.21101	7.07543	11.1175	8.52027	4.90998	2.69858	9.70406	1.53879	9.64884		22.7841	11.0134	11.1451	10.025	12.7532	6.25712	2.42626	11.448	3.14472	9.00313		24.232	9.96101	10.2438	10.3386	12.589	6.38861	2.8323	12.8294	2.8534	7.73181		23.8812	10.7947	9.4357	9.6662	12.673	7.80675	3.32034	11.1908	3.38186	7.84946		28.0321	8.16695	9.78196	11.1966	10.3536	6.57514
34.2996	8.48547	7.50049	10.9137	9.01475	5.55106	2.91063	10.4162	1.71727	9.19084		22.6072	11.1509	10.9963	9.85134	12.5735	6.52687	2.72302	11.3764	3.24414	8.95027		23.5916	10.0582	10.2885	10.2059	12.6585	6.64271	3.0301	13.1062	2.9213	7.49691		23.1544	10.8962	9.53911	9.72111	12.6983	7.85881	3.4359	11.3779	3.4175	7.90071		29.1277	7.99244	9.67125	11.4773	10.057	6.21882
34.1098	8.54905	7.34356	10.6075	8.69739	5.62933	3.55642	11.2221	1.6913	8.5936		21.7506	11.3864	11.2772	9.53412	13.445	6.84164	2.47672	11.4096	3.44005	8.43868		23.6912	10.0458	10.2011	10.2814	12.5074	6.55211	3.1192	12.8915	3.0048	7.70541		23.1711	10.9073	9.52185	9.58979	12.7747	8.04536	3.43908	11.415	3.42627	7.70956		29.9088	7.71999	9.75587	11.6946	9.77827	6.01944
35.614	8.09197	7.35078	11.425	8.7645	4.94086	2.51853	9.76235	1.64948	9.88253		22.2578	11.3526	10.8731	9.96124	12.7569	6.41053	2.77666	11.297	3.26671	9.04744		24.7469	9.86431	10.0642	10.546	12.5645	6.20191	2.701	12.5921	2.7871	7.93191		23.3689	10.927	9.46611	9.75831	12.7859	7.79421	3.3375	11.2315	3.3843	7.94621		29.1372	7.93362	9.79514	11.5764	10.0987	6.1364
36.8446	8.49166	6.81331	10.6666	8.17535	5.01002	3.25921	9.74844	1.63354	9.35718		22.6606	11.019	11.0349	10.0262	12.7172	6.40335	2.53908	11.4001	3.20562	8.99398		24.8753	9.81601	10.0857	10.5349	12.3992	6.28841	2.6899	12.4693	2.7897	8.05151		23.1401	10.8918	9.35421	9.98551	12.8954	7.71221	3.3405	11.2435	3.3976	8.03911		30.172	7.76213	9.553	11.9683	9.81442	5.72474
35.9656	8.21355	7.35713	10.6444	8.35315	5.33661	3.06475	10.3481	1.63913	9.07757		23.0214	10.9974	10.9861	10.0862	12.2077	6.42874	2.60049	11.3015	3.04775	9.3227		25.0744	9.77621	10.1402	10.5936	12.4822	6.12267	2.53847	12.3525	2.7853	8.13448		22.6391	10.9967	9.46981	9.96591	13.1808	7.68191	3.315	11.5065	3.3887	7.85551		29.8858	7.81787	9.71007	11.7618	9.84529	5.89135
34.747	8.50838	7.3337	10.7309	8.68446	5.36427	3.28367	10.6798	1.69895	8.96887		22.4621	11.2553	11.0463	9.87525	12.8778	6.58981	2.48574	11.3134	3.16339	8.93087		25.2317	9.74051	9.97541	10.7751	12.4064	6.01731	2.5515	12.4055	2.6694	8.22711		22.6992	11.0002	9.69641	9.84267	13.4073	7.46671	3.17418	11.79	3.33094	7.59236		29.9412	7.82079	9.66035	11.757	9.84478	5.89743
36.7187	8.04915	7.15851	11.2135	8.50318	4.86541	2.5599	9.49802	1.61753	9.81615		22.6076	11.1723	10.8051	9.90119	12.5911	6.63163	2.79192	11.2434	3.28244	8.97331		24.7749	9.79511	10.2859	10.5311	12.4648	6.24661	2.5422	12.6206	2.7097	8.02901		22.0183	11.111	9.88961	9.80771	13.6235	7.59781	3.1273	11.8144	3.4212	7.58911		29.7654	7.76485	9.77094	11.7492	9.90495	5.92857
35.2086	8.39931	7.41137	10.7463	8.68764	5.35568	3.01719	10.3264	1.70384	9.1437		22.0216	11.2057	10.9946	9.63439	13.002	6.98038	2.76627	11.2603	3.53154	8.60324		25.0274	9.75551	9.98961	10.6669	12.3606	6.06991	2.7367	12.516	2.7761	8.10121		22.3351	10.8515	9.9077	9.3896	13.331	8.38139	3.25316	11.9124	3.49061	7.14754		29.3074	7.88667	9.76482	11.5449	9.97245	6.14094
37.1177	7.9756	7.02947	11.0376	8.2346	5.01166	2.76355	9.73791	1.53837	9.55355		21.8293	11.3169	11.3202	9.53156	13.4252	6.75055	2.4869	11.4188	3.4921	8.42849		25.151	9.74311	9.95051	10.8194	12.3828	6.00101	2.5911	12.3921	2.6902	8.27871		22.2844	11.0071	10.1737	9.82821	13.6876	7.15021	2.9334	11.8292	3.4459	7.66021		30.019	7.74206	9.73625	11.7352	9.81286	5.88088
36.4418	8.25086	7.00646	10.7517	8.23722	5.11791	3.2184	10.2692	1.5797	9.12668		22.5887	11.1663	10.9733	9.8849	12.6111	6.56398	2.67716	11.3653	3.2027	8.9666		25.2954	9.75151	9.91111	10.6996	12.2773	6.10461	2.6749	12.3965	2.695	8.19401		21.9574	11.1004	10.3575	9.62891	13.7933	7.27551	2.9503	11.9654	3.4928	7.47841		28.9468	7.896	9.89004	11.4447	9.99584	6.20724
34.6502	8.55146	7.34885	10.4188	8.40159	5.62907	3.61646	11.0438	1.69418	8.64554		22.2932	11.3139	10.964	9.79642	12.8393	6.66022	2.68614	11.274	3.29423	8.87852		25.4982	9.68491	9.96341	10.782	12.3838	6.03461	2.4538	12.2413	2.6643	8.29361		22.0878	11.1711	10.1416	9.80308	13.9834	7.08623	2.89098	11.7098	3.51321	7.61284		29.978	7.74534	9.73966	11.7405	9.81588	5.87755
36.1253	8.29779	6.91767	11.152	8.33011	5.01624	3.04534	9.88396	1.57897	9.65259		21.6878	11.3374	11.2296	9.51879	13.4787	6.92959	2.53501	11.3807	3.53021	8.37228		25.4306	9.65971	10.0032	10.8205	12.3476	6.03421	2.4402	12.2205	2.6755	8.36791		21.7917	11.1369	10.5163	9.58181	13.8563	7.25981	2.8795	11.9453	3.5247	7.50761		28.0231	8.19262	9.86447	11.0781	10.2993	6.6788
35.4933	8.37292	7.14118	10.7749	8.38916	5.39517	3.25877	10.3088	1.68289	9.18291		22.0231	11.3188	11.1576	9.6095	12.6984	6.8248	2.80006	11.3978	3.37005	8.79984		24.8477	9.69901	10.0881	10.6395	12.3713	6.23641	2.6951	12.7247	2.713	7.98511		21.6862	11.1465	10.587	9.51151	13.9177	7.28431	2.8841	11.9539	3.5862	7.44251		28.8401	7.95045	9.80388	11.3754	10.144	6.36826
35.5586	8.40499	6.77748	11.2195	8.49499	5.15059	3.19856	9.92674	1.66883	9.59977		22.6447	11.0808	11.1001	9.99128	13.1177	6.50606	2.23445	11.2348	3.18531	8.90488		25.1892	9.59491	10.0246	10.8559	12.3742	6.03311	2.5237	12.4737	2.6888	8.24181		21.6539	11.2394	10.5646	9.64991	13.9308	7.02431	2.8613	11.909	3.5348	7.63191		29.9923	7.77052	9.65545	11.7819	9.83366	5.87199
34.3744	8.43547	7.56438	10.5681	8.70955	5.76559	3.2255	10.7655	1.7618	8.82972		22.0758	11.255	11.178	9.68391	13.0033	6.77091	2.58587	11.4685	3.31425	8.66459		24.6581	9.74891	10.1068	10.6654	12.3813	6.27091	2.6981	12.5972	2.7691	8.10411		21.775	11.138	10.5392	9.60851	13.8622	7.18041	2.8744	11.8894	3.5615	7.57131		30.1199	7.71231	9.6979	11.7628	9.7415	5.88115
34.9535	8.47019	7.4708	10.5252	8.30395	5.47933	3.40022	10.8843	1.61044	8.902		22.2815	11.302	10.954	9.95805	12.5551	6.49445	2.77159	11.3152	3.21741	9.15056		25.018	9.70651	9.94751	10.8643	12.396	6.00161	2.6271	12.6789	2.6062	8.15381		21.285	11.2967	10.7385	9.48901	13.8869	7.25751	2.9094	11.9444	3.6016	7.59091		29.5282	7.96628	9.75118	11.7496	10.0926	5.79444
34.4481	8.6374	7.37651	10.6352	8.71341	5.55577	3.31131	10.4985	1.78837	9.0355		22.4983	11.1667	10.8738	10.0773	12.3954	6.514	2.76194	11.3637	3.13083	9.21798		25.4478	9.66041	9.90261	10.8039	12.2922	6.06291	2.5618	12.35	2.654	8.26431		21.5586	11.1983	10.6148	9.59781	13.8465	7.28391	2.8437	11.8747	3.5379	7.64371		28.5205	8.10615	9.94518	11.2642	10.1834	6.39975
34.8853	8.44392	7.31609	11.0716	9.00232	5.14682	2.87342	10.1669	1.72703	9.36654		22.4032	11.1765	10.7886	10.0746	12.5796	6.44311	2.83514	11.2688	3.29683	9.13367		25.4074	9.65911	9.94971	10.8565	12.3452	6.01521	2.4803	12.3522	2.6221	8.31221		21.3955	11.2874	10.7285	9.43441	13.8244	7.38171	2.8926	11.9852	3.5327	7.53751		30.0816	7.69598	9.67569	11.9205	9.7999	5.78809
35.4375	8.21873	7.08846	11.7152	9.00304	4.81154	2.46118	9.38691	1.70468	10.1728		22.5181	11.2102	10.8569	9.96028	12.4941	6.53159	2.80568	11.2193	3.26615	9.13765		25.3008	9.60731	9.90581	10.9153	12.2841	6.00181	2.5819	12.5718	2.5873	8.24381		21.6728	11.1728	10.5028	9.69701	14.0519	7.09241	2.8052	11.8022	3.595	7.60781		30.0186	7.72952	9.69288	11.7959	9.77248	5.92277
35.8255	8.14164	7.4197	11.3705	8.91136	4.92096	2.31048	9.60444	1.60267	9.89276		21.9618	11.2422	11.0369	9.7035	12.813	6.88139	2.81015	11.3871	3.42012	8.74389		25.1784	9.64051	10.0155	10.894	12.3939	6.04931	2.4594	12.4348	2.6264	8.30771		21.7204	11.2126	10.524	9.56881	13.8449	7.22721	2.9046	11.9228	3.5213	7.55331		28.4964	8.09124	9.75345	11.2533	10.1697	6.57955
35.1326	8.2391	7.52337	10.7469	8.74379	5.44248	2.95107	10.4435	1.74323	9.03396		22.6256	10.8933	11.3332	10.2567	13.2009	6.22419	1.93749	11.47	3.02344	9.0351		24.8999	9.80021	10.0297	10.7187	12.4413	6.15371	2.604	12.5807	2.649	8.12271		21.6026	11.3481	10.2473	9.4103	13.9457	7.67365	3.05742	11.925	3.51741	7.27257		30.234	7.7399	9.57837	11.9177	9.78279	5.71132
35.4134	8.27984	7.05511	11.4274	8.82762	5.13155	2.69144	9.6475	1.66924	9.85691		22.4468	11.1163	11.092	9.88238	12.6346	6.62024	2.6172	11.3721	3.23497	8.98338		25.1314	9.77591	9.93391	10.6721	12.3215	6.14211	2.7085	12.5085	2.694	8.11201		21.6514	11.097	10.3227	9.57901	13.9039	7.50751	3.0184	11.8945	3.6359	7.38961		29.2137	7.9738	9.7371	11.5326	10.0021	6.11709
36.1881	8.4304	6.92423	10.6493	8.28547	5.26277	3.34323	10.1883	1.6389	9.08932		22.5081	11.116	11.1019	10.0425	13.3813	6.38218	2.16187	11.3717	3.15946	8.77516		24.8207	9.96031	10.0549	10.8432	12.4184	6.05201	2.4762	12.2976	2.5838	8.49281		21.2561	11.3151	10.4327	9.31661	14.0716	7.60291	3.1278	12.0638	3.6905	7.12281		29.2913	7.94723	9.67491	11.5657	10.0233	6.09243
36.39	8.18118	7.18392	11.0352	8.56222	4.89245	2.76809	9.72207	1.68933	9.57559		22.1575	11.2815	11.0165	9.97242	12.8645	6.51724	2.60068	11.4081	3.19619	8.98536		25.8539	9.64725	9.76827	11.1775	12.1739	5.78557	2.32397	12.1576	2.39258	8.71956		19.596	11.4632	10.9053	8.66511	14.1403	8.65181	3.5039	12.638	3.9761	6.46021		29.4393	7.9697	9.71542	11.6512	10.0195	6.00316
36.6341	8.09305	7.2636	10.7439	8.20433	5.1305	2.96194	10.1768	1.56094	9.23082		21.8342	11.2517	11.0397	9.76067	12.6828	6.77136	2.92943	11.5048	3.41238	8.81285		24.5283	9.77801	10.2974	10.5446	12.447	6.45471	2.5539	12.6632	2.7055	8.02731		19.6153	11.4102	10.8518	8.52652	14.1655	8.77337	3.63954	12.7462	4.07002	6.20165		30.1171	7.72549	9.63478	11.8153	9.7671	5.8429
34.9103	8.26851	7.66329	10.4273	8.36418	5.78989	3.24275	10.914	1.66519	8.75458		21.7338	11.1949	11.2187	9.67465	12.4797	6.9334	2.93528	11.572	3.40113	8.85651		24.4915	9.86641	10.2345	10.6077	12.5487	6.39221	2.5083	12.5411	2.6962	8.11331		19.5384	11.3243	10.9883	8.28927	14.1215	8.96091	3.74986	12.9857	4.14984	5.89189		29.9275	7.74152	9.78161	11.6965	9.83041	5.89755
34.0989	8.59177	7.25698	11.1683	8.91022	5.27147	3.13907	10.3059	1.77392	9.48355		22.3503	11.1443	11.0674	9.95884	12.7664	6.55138	2.56758	11.3602	3.23238	9.00128		24.3843	9.85371	10.1949	10.7222	12.388	6.37771	2.581	12.5332	2.679	8.28591		21.1746	11.1444	10.4533	8.79382	13.2997	8.9082	3.48937	12.2059	3.69071	6.84004		29.4299	7.87269	9.85567	11.5403	9.94188	6.10675
36.2919	8.30266	7.02623	11.0496	8.57507	4.96805	2.85589	9.59399	1.70858	9.62801		21.9148	11.3244	11.2797	9.56231	13.0236	6.81991	2.61642	11.4466	3.38235	8.62994		23.6366	9.87951	10.3684	10.5927	12.4428	6.75811	2.6803	12.7859	2.7532	8.10241		25.8506	10.1959	9.1912	9.97203	12.2367	7.35432	3.01803	11.2414	3.01343	7.92638		29.4727	7.94801	9.77962	11.6221	10.0353	6.00129
35.9751	8.15746	7.06487	11.4854	8.81739	4.90795	2.5215	9.40246	1.68245	9.98546		22.1671	11.4007	10.9135	9.87385	12.6383	6.61004	2.80446	11.2912	3.23469	9.06616		23.9218	9.94331	10.2826	10.6281	12.5615	6.52051	2.6157	12.7429	2.6947	8.08881		26.2593	10.1936	8.99973	9.73502	12.2273	7.4508	3.19969	11.3552	3.03882	7.54054		30.0557	7.75434	9.66392	11.8705	9.83093	5.73434
36.5066	8.24788	7.03289	11.0073	8.45893	4.95513	2.87585	9.78816	1.60353	9.52366		22.8578	11.2131	10.8282	9.97143	12.4627	6.37253	2.74753	11.3048	3.13401	9.10789		23.5028	9.73657	10.4207	10.9189	12.0634	6.77517	2.62133	12.7048	2.64273	8.61354		25.7163	10.1633	9.12624	9.81308	12.3559	7.49711	3.19445	11.3868	3.16054	7.58633		29.5773	7.82454	9.80443	11.6551	9.88024	6.02987
35.8689	8.27285	7.24805	11.0606	8.58953	5.03769	2.80758	9.81583	1.68172	9.6173		22.3786	11.2651	11.1131	9.68899	12.7345	6.65475	2.68145	11.4703	3.23751	8.77569		24.0019	9.86111	10.2215	10.754	12.4508	6.51291	2.6111	12.7464	2.6435	8.19671		23.5972	10.5394	9.61621	9.23921	12.5923	8.41971	3.5702	11.9097	3.4499	7.06611		28.8334	8.03146	9.80694	11.5415	10.2373	6.12888
35.9944	8.31577	6.92215	10.9659	8.33692	5.24789	3.16517	10.0717	1.60092	9.37916		22.208	11.2715	11.1028	9.7944	12.8015	6.51733	2.70333	11.4317	3.30407	8.86548		24.0505	9.92021	10.2779	10.6042	12.4323	6.53821	2.6472	12.692	2.6962	8.14121		22.5437	10.8966	9.88451	9.34651	13.1584	8.19661	3.3713	12.0673	3.4108	7.12421		29.7781	7.83763	9.72765	11.6804	9.96637	5.9427
36.0437	8.21862	7.3193	10.8173	8.5435	5.33498	2.79309	9.89543	1.66731	9.36668		22.3598	10.953	11.1704	10.0141	12.3808	6.59827	2.66963	11.6226	3.15731	9.07399		24.2618	9.88601	10.308	10.5444	12.4355	6.55101	2.5804	12.4447	2.7868	8.20131		22.3557	11.0449	10.092	9.30681	13.1877	7.97491	3.3195	12.1334	3.3703	7.21471		30.114	7.75352	9.63635	11.8426	9.80907	5.80379
35.3817	8.35625	7.16855	10.9291	8.61797	5.31607	3.06708	10.2477	1.65806	9.25748		21.5901	11.3155	11.1732	9.62725	12.6097	6.92268	2.98107	11.5089	3.45998	8.81157		24.8431	9.73241	10.2331	10.6981	12.4415	6.22641	2.447	12.5042	2.666	8.20811		22.1525	11.0562	10.4269	9.29241	13.5287	7.65391	3.085	12.2564	3.4065	7.14141		29.6279	7.89556	9.65689	11.6602	10.0231	6.02953
36.5793	8.17266	6.9471	11.3767	8.53867	4.67363	2.69428	9.51303	1.59469	9.90988		22.8077	11.0605	10.8919	10.2441	12.5694	6.24585	2.52194	11.3435	3.05017	9.2648		24.9112	9.67871	10.059	10.7135	12.4143	6.24761	2.6016	12.6119	2.6929	8.06921		22.2013	11.0889	10.364	9.35771	13.6143	7.44121	3.1054	12.2199	3.4401	7.16711		29.0367	7.93322	9.72286	11.5257	10.0627	6.26799
35.9878	8.10078	7.17206	11.3861	8.65438	4.83566	2.65289	9.74012	1.64601	9.82412		22.513	11.0287	10.7718	10.1731	12.6121	6.46074	2.74817	11.334	3.25878	9.09964		24.8599	9.75771	10.1692	10.6688	12.3701	6.23731	2.5495	12.5389	2.6708	8.17771		22.1847	11.1259	10.6146	9.20571	13.5545	7.42971	3.0323	12.2517	3.428	7.17281		30.0085	7.74753	9.75665	11.6915	9.82055	5.92963
35.295	8.31664	7.39793	10.7005	8.40326	5.31943	3.23473	10.7395	1.60762	8.98544		22.1167	11.3185	11.0203	9.8019	12.6766	6.65153	2.79533	11.3914	3.28934	8.93839		24.853	9.78431	10.0142	10.8204	12.3954	6.06041	2.6188	12.7281	2.5674	8.15791		21.9151	11.0452	10.4695	8.91311	12.9153	8.54831	3.4054	12.4293	3.3606	6.99811		30.1064	7.68635	9.68234	11.8642	9.76914	5.81886
34.6581	8.49625	7.26974	10.8547	8.78659	5.43401	3.18853	10.5181	1.70924	9.08469		22.4329	11.2188	10.8911	10.0011	12.7163	6.40854	2.71931	11.4023	3.21234	8.99732		25.7718	9.30361	9.93951	11.2457	12.0239	5.70751	2.4113	12.6276	2.4274	8.54161		22.4126	10.9782	10.0893	9.26353	12.9314	8.01903	3.4765	12.2757	3.35995	7.1937		29.7237	7.86276	9.70188	11.6475	9.90391	6.04324
36.6142	8.01445	7.03564	11.5098	8.51165	4.77957	2.49497	9.43687	1.54316	10.0597		22.5047	11.2138	10.9548	9.8013	12.6029	6.67517	2.74537	11.3248	3.25474	8.92244		24.6963	9.81331	9.93181	10.5525	12.2349	6.43141	2.9277	12.5306	2.8391	8.04231		25.3894	10.5432	9.30345	9.69491	12.348	7.34626	3.18828	11.5085	2.988	7.6899		29.9525	7.79454	9.71264	11.8322	9.81095	5.77182
35.3766	8.18034	7.32169	11.833	9.18386	4.50781	2.22149	9.27402	1.74729	10.3539		22.3722	11.2928	10.958	9.88723	12.799	6.49846	2.67313	11.2988	3.25603	8.96437		25.1958	9.72771	10.0301	10.7736	12.2923	6.09871	2.539	12.4011	2.6358	8.30581		24.7078	10.6808	9.37765	9.61184	12.6286	7.46591	3.26883	11.4699	3.19687	7.59181		29.5655	7.97156	9.64418	11.7696	10.1419	5.86548
37.3591	7.99792	7.01637	11.2614	8.32044	4.70353	2.53153	9.28688	1.55791	9.96487		21.8339	11.3715	11.111	9.64353	13.212	6.84964	2.6119	11.3879	3.39338	8.58521		24.7071	9.83981	10.135	10.5893	12.3959	6.21261	2.6979	12.7209	2.683	8.01841		22.7223	10.8995	9.94531	8.99771	12.7922	8.32581	3.6871	12.2195	3.4963	6.91421		29.6335	7.81081	9.75126	11.6866	9.88067	6.00947
34.44	8.4303	7.19379	11.0741	8.59881	5.36468	3.31597	10.4569	1.76804	9.35745		21.9399	11.2173	11.243	9.75243	13.3471	6.66153	2.42143	11.4147	3.40024	8.6023		24.9771	9.73911	10.1447	10.6962	12.3822	6.26001	2.4799	12.2912	2.7282	8.30131		22.3442	10.8836	10.0677	9.01061	13.0635	8.30761	3.6222	12.3027	3.5947	6.80311		29.9794	7.73715	9.67904	11.8179	9.76614	5.83096
34.4726	8.49335	7.21986	10.709	8.73848	5.76212	3.3384	10.6155	1.76274	8.888		22.2	11.1732	11.1607	9.88238	12.603	6.59358	2.67175	11.3734	3.28075	9.06124		24.6324	9.86731	10.0152	10.5263	12.343	6.37501	2.8496	12.4907	2.8497	8.05071		22.0808	11.074	9.98551	9.00821	13.0344	8.55411	3.6346	12.2867	3.4642	6.87741		30.0613	7.67026	9.65873	11.8253	9.79893	5.8752
34.5465	8.31535	7.74898	10.5106	8.3559	5.56556	3.35002	11.0852	1.70238	8.81945		22.3644	11.1581	11.0763	9.82007	12.48	6.68225	2.76089	11.4231	3.24866	8.98619		24.4118	9.77861	10.3446	10.481	12.5405	6.51181	2.553	12.4833	2.8646	8.03071		21.9811	11.0662	10.2554	8.78337	13.1306	8.55443	3.59513	12.4648	3.52251	6.64644		29.0671	8.0371	9.74477	11.5905	10.0849	6.08581
34.2402	8.42856	7.27638	10.8899	8.57499	5.65922	3.38344	10.4865	1.85182	9.20897		22.3536	11.4325	10.8408	9.69372	12.7414	6.67096	2.8657	11.0976	3.39179	8.91193		24.9462	9.86061	10.1504	10.5942	12.4513	6.25791	2.4973	12.3115	2.7121	8.21841		21.8045	11.1783	10.2089	9.1777	13.4322	7.90829	3.45179	12.347	3.50971	6.98161		29.5799	7.81261	9.89837	11.6403	9.90477	5.91496
35.3416	8.53453	6.97297	11.1247	8.72169	5.03192	3.08783	9.9877	1.67379	9.52335		22.0019	11.3317	11.1199	9.65032	13.1769	6.77761	2.58555	11.3952	3.37046	8.59039		25.0163	9.80481	10.0298	10.5834	12.4777	6.19191	2.6414	12.3955	2.795	8.06411		23.7782	10.9456	9.95061	8.80896	12.6293	8.01757	3.55508	12.0839	3.33025	6.90054		29.6215	7.8689	9.76677	11.6795	9.96619	5.93473
34.6364	8.53943	7.21293	11.2127	8.9198	5.18364	2.93525	9.99745	1.73323	9.62913		21.8509	11.2394	11.1038	9.70463	12.6889	6.83279	2.8856	11.6888	3.31819	8.68688		25.074	9.73991	10.134	10.5247	12.4388	6.32921	2.5503	12.474	2.7298	8.00521		22.8405	10.5938	9.93641	9.29727	12.4999	8.87742	3.3606	11.5503	3.50659	7.53727		29.7279	7.82596	9.74242	11.7634	9.93484	5.9115
34.5375	8.8122	6.90923	10.701	8.66526	5.39339	3.6857	10.6559	1.73904	8.90079		22.5009	11.2361	10.9334	9.89974	12.6536	6.52379	2.70922	11.2481	3.26123	9.03388		25.3655	9.75591	10.074	10.56	12.4159	6.17821	2.5082	12.2567	2.7469	8.13861		23.2552	10.7588	9.71067	9.70667	12.7252	8.07707	3.17457	11.3862	3.31997	7.8855		30.1371	7.71742	9.57094	11.9519	9.76055	5.78859
35.482	8.44994	7.07745	10.9302	8.62443	5.21915	3.10469	10.1223	1.66985	9.32004		22.605	11.0494	10.9341	9.98694	12.38	6.64786	2.73786	11.3672	3.18615	9.10534		24.8771	9.78461	10.1421	10.6228	12.3849	6.24391	2.5898	12.4236	2.7492	8.18191		23.5588	10.805	9.54743	9.44441	12.6297	8.26287	3.37998	11.2677	3.43229	7.67195		29.2583	7.94797	9.69733	11.6614	10.1021	6.04101
35.1784	8.36357	7.20125	10.8417	8.50376	5.54	3.16418	10.3975	1.63673	9.17301		22.2182	11.3191	11.1741	9.81078	13.4798	6.56194	2.2252	11.2959	3.2449	8.67004		24.3538	9.90931	10.247	10.4614	12.4883	6.34841	2.7416	12.7814	2.7639	7.90481		23.4344	10.7363	9.63342	9.55387	12.6543	8.20886	3.29579	11.3503	3.39645	7.73637		29.5497	7.81245	9.73944	11.6051	9.90825	6.10597
35.184	8.54066	6.94376	10.8957	8.53478	5.32325	3.36914	10.3341	1.67138	9.20325		22.62	11.2243	10.996	9.93735	12.4795	6.46789	2.67131	11.3011	3.14596	9.15664		24.3777	9.89261	10.2405	10.3869	12.531	6.44671	2.7485	12.7218	2.8271	7.82711		23.5178	10.8397	9.61668	9.45621	12.6143	8.08186	3.40037	11.3462	3.42298	7.704		29.2574	7.95187	9.81713	11.6348	10.1298	5.9569
34.2892	8.76033	7.10598	10.5977	8.81713	5.54068	3.59278	10.6228	1.86301	8.81041		22.7674	11.0936	11.0448	9.73576	12.8311	6.60112	2.57281	11.3548	3.28671	8.71189		24.4927	9.86881	10.2167	10.4762	12.4988	6.29501	2.7294	12.7764	2.7646	7.88131		23.0582	10.7969	9.70786	9.57843	12.7661	8.22396	3.29116	11.4416	3.40889	7.72696		29.9778	7.81281	9.61442	11.8191	9.84025	5.88119
35.1477	8.33282	7.57776	10.6549	8.52919	5.34811	3.08842	10.7442	1.60338	8.9735		22.4769	11.2667	10.94	9.99836	13.1199	6.45367	2.40332	11.2355	3.18199	8.9237		24.716	9.83671	10.1391	10.4976	12.4994	6.35531	2.6595	12.5792	2.7708	7.94631		23.5662	10.831	9.63098	9.51083	12.5065	8.14898	3.33184	11.1892	3.39047	7.89398		29.677	7.90939	9.71547	11.7188	9.9886	5.90149
35.4586	8.22238	7.19197	11.6237	9.05979	4.75541	2.43626	9.57423	1.66358	10.0141		22.3391	11.3181	10.9632	9.82766	12.6153	6.5232	2.81133	11.3111	3.28585	9.00503		24.5576	9.90581	10.1378	10.411	12.4724	6.39741	2.7846	12.6585	2.8075	7.86731		23.8025	10.796	9.31621	9.65921	12.5679	8.12551	3.3786	11.0742	3.3856	7.89421		29.0326	8.02035	9.68264	11.4789	10.1147	6.26055
35.7248	8.23655	7.21709	10.8697	8.52431	5.28172	3.02923	10.3188	1.62261	9.17514		22.2793	11.327	10.9111	9.85442	12.818	6.49756	2.77341	11.3562	3.29596	8.887		24.4932	9.95991	10.1241	10.3704	12.5497	6.41531	2.7964	12.6421	2.8323	7.81651		23.427	10.8884	9.43681	9.69781	12.6127	8.05791	3.3723	11.1198	3.393	7.99421		29.817	7.81124	9.78905	11.6525	9.83125	5.94003
35.8262	8.25357	7.02901	11.6067	8.90451	4.6836	2.53092	9.42974	1.65607	10.0798		22.6517	11.2162	10.9417	9.74869	12.6488	6.60839	2.74649	11.3108	3.27868	8.84848		24.3601	9.93011	10.2831	10.4008	12.6015	6.27101	2.7347	12.728	2.8479	7.84271		23.6225	10.8912	9.39701	9.65771	12.4917	8.08591	3.3996	11.1242	3.3363	7.99381		29.217	7.94213	9.72595	11.5734	10.0545	6.14271
35.5306	8.31049	7.30261	10.7651	8.598	5.37353	3.02627	10.2795	1.68129	9.13259		22.7537	11.2638	10.7982	9.97654	12.7755	6.50203	2.57749	10.9954	3.23509	9.12221		24.3549	9.92071	10.3444	10.3172	12.6285	6.46181	2.6554	12.6033	2.8798	7.83391		23.5229	10.7915	9.45821	9.77784	12.573	7.9383	3.35115	11.1578	3.39197	8.03734		29.881	7.83158	9.73247	11.6658	9.79898	5.997
36.0414	8.43929	7.07986	10.8746	8.58197	5.02027	3.00444	9.80014	1.71574	9.4423		22.7409	11.0299	10.9822	10.0006	12.9269	6.56456	2.38634	11.2926	3.17952	8.89646		23.7196	10.0548	10.1921	10.1807	12.5927	6.70511	3.0911	12.8393	3.0364	7.58811		23.1714	10.945	9.4143	9.71186	12.6429	8.14885	3.41979	11.2115	3.37018	7.96431		29.9928	7.7361	9.62015	11.7952	9.82837	5.90306
36.6646	8.40984	7.0977	10.2005	8.17498	5.33842	3.40888	10.51	1.58531	8.60979		22.4711	11.1972	10.9503	9.91886	12.8811	6.68147	2.51531	11.2249	3.21997	8.9398		24.4421	9.90471	10.3437	10.3187	12.5951	6.36071	2.6863	12.6885	2.8591	7.80101		22.9725	10.9713	9.50981	9.73251	12.8039	8.02011	3.3737	11.2595	3.4152	7.94141		29.8092	7.76673	9.81975	11.6127	9.90185	5.96413
33.8187	8.70713	7.39792	10.8878	9.07558	5.41784	3.20462	10.5252	1.82522	9.13999		22.695	11.0407	11.0629	9.98033	12.6489	6.53139	2.49855	11.3935	3.13751	9.01112		23.5768	10.0201	10.4138	10.1039	12.6677	6.76221	2.9688	13.0361	2.9815	7.46901		23.4626	10.7664	9.31876	9.77734	12.6953	8.14198	3.37076	11.2152	3.38696	7.86467		29.7961	7.75465	9.73479	11.7689	9.89211	5.95293
32.9697	8.93446	7.4895	10.3441	8.79237	5.91331	3.86172	11.3038	1.88341	8.50758		22.3948	11.2851	11.0995	9.85478	12.9876	6.41119	2.50632	11.3118	3.25185	8.897		24.1715	9.96821	10.0416	10.3221	12.6073	6.58991	2.9678	12.7363	2.94	7.65521		23.1337	10.965	9.41091	9.75811	12.8016	7.96631	3.3977	11.2838	3.3795	7.90331		28.7631	7.98272	9.77915	11.4813	10.1039	6.35944
35.0968	8.60812	7.10479	10.4599	8.50798	5.52592	3.56616	10.6501	1.74314	8.7371		22.6972	11.2073	10.8712	9.92965	12.6785	6.43885	2.68837	11.2623	3.22801	8.99862		23.7467	10.1071	10.3976	10.0446	12.6641	6.68261	2.9575	12.7814	3.0441	7.57421		22.9485	10.8545	9.51322	9.80958	12.8454	8.05833	3.32377	11.2936	3.42909	7.924		29.7449	7.88198	9.66552	11.8079	9.93733	5.85893
34.2363	8.55978	7.46307	10.4697	8.48016	5.7884	3.53536	11.1818	1.63587	8.6496		22.3058	11.2513	10.9863	9.86059	12.605	6.63041	2.75691	11.3976	3.22784	8.97828		24.0826	10.0821	10.1981	10.1785	12.7371	6.56671	2.8891	12.7067	2.9623	7.59671		23.1929	10.7567	9.4088	9.68166	12.7254	8.10324	3.52041	11.4278	3.49531	7.68785		29.9085	7.73392	9.78506	11.7448	9.79216	5.8974
33.2993	8.94398	7.64759	10.1839	8.59483	5.9808	3.75929	11.3549	1.73118	8.50427		22.3171	11.299	10.9186	9.88811	12.6998	6.49714	2.78674	11.2726	3.31059	9.01033		23.8465	10.1477	10.2022	9.94791	12.6126	6.84631	3.1233	12.7363	3.0887	7.44841		22.7844	10.9806	9.41211	9.82221	12.863	7.92011	3.4916	11.3454	3.4661	7.91441		29.8664	7.73511	9.77031	11.6686	9.85123	5.96217
33.9827	8.58631	7.64273	10.2186	8.57945	5.92305	3.60332	11.3232	1.75901	8.38172		22.5654	11.209	11.0092	9.93944	12.6111	6.48603	2.61525	11.3551	3.1438	9.06559		22.9393	10.203	10.5742	9.79201	12.8539	7.11141	3.08	13.115	3.135	7.19611		22.3395	10.9858	9.57191	9.59901	12.9245	8.28481	3.5618	11.6331	3.5005	7.59901		29.6088	7.85782	9.68863	11.6859	9.97628	5.99191
35.3232	8.3755	7.54731	10.133	8.2486	5.75864	3.46669	10.8901	1.73237	8.52456		22.0172	11.3587	11.1235	9.714	13.0381	6.68097	2.61502	11.3914	3.32057	8.74057		23.3861	10.3859	10.3551	9.80961	12.8638	6.88941	3.0727	12.7334	3.1225	7.38141		22.7302	10.942	9.45691	9.8994	13.1161	7.77707	3.36098	11.4796	3.43669	7.80098		29.2089	7.86083	9.75605	11.4857	9.97927	6.27682
34.0925	8.76579	7.57282	10.0561	8.48002	5.74602	3.82887	11.2766	1.83434	8.347		22.2883	11.2128	11.0284	9.94991	12.635	6.51176	2.69809	11.3283	3.25914	9.08844		23.7582	10.1395	10.3508	9.95721	12.5695	6.89771	3.0095	12.7516	3.0241	7.54181		22.3323	11.0653	9.57111	9.94311	13.1796	7.72001	3.3372	11.4853	3.4372	7.92881		29.6595	7.83368	9.87483	11.529	9.90213	6.04664
34.8471	8.50041	7.24522	10.4727	8.40463	5.69947	3.55611	10.8298	1.71606	8.72847		22.2539	11.204	11.1797	9.75383	12.9005	6.6592	2.55717	11.4983	3.24621	8.74715		23.1837	10.3252	10.3915	9.74711	12.8027	7.06981	3.1707	12.8365	3.1869	7.28581		22.435	10.9811	9.85327	9.77334	13.3593	7.6871	3.14207	11.7159	3.39977	7.65308		29.9558	7.79548	9.60506	11.7376	9.92709	5.89749
36.177	8.30435	6.97334	10.9737	8.50103	5.14331	2.99011	9.85258	1.64857	9.43602		22.4296	11.2071	10.9324	9.85442	12.778	6.71417	2.64879	11.2722	3.26421	8.89905		23.4487	10.1902	10.4615	9.73201	12.7126	7.04191	3.1097	12.8113	3.196	7.29601		22.5849	10.9086	9.72736	10.1023	13.4304	7.33918	3.03871	11.4463	3.44019	7.98201		29.788	7.80684	9.71714	11.7516	9.83125	5.99024
35.8361	8.31368	7.35012	10.4601	8.25613	5.48648	3.2435	10.5368	1.62119	8.89595		22.4673	11.2215	11.0654	9.8218	12.9097	6.58234	2.52203	11.3142	3.24144	8.85423		24.1309	10.1787	10.3428	9.97133	12.344	6.73932	2.98941	12.699	2.89391	7.71052		21.923	11.1326	10.2462	9.74061	13.7454	7.29851	2.9634	11.6827	3.5516	7.71591		29.8206	7.79777	9.69293	11.8507	9.86914	5.7948
34.9304	8.34016	7.80252	10.0231	8.34789	5.95111	3.38939	11.304	1.64273	8.26878		22.2793	11.199	11.1805	9.84718	13.2173	6.52949	2.35977	11.5202	3.19902	8.66826		23.3238	10.1651	10.2381	9.68501	12.6322	7.22391	3.4043	13.0211	3.2464	7.06001		22.2096	11.1888	10.2776	9.87311	14.0007	6.78011	2.7596	11.6706	3.4691	7.77071		29.7404	7.81185	9.56933	11.6911	9.92215	6.05247
35.4898	8.33949	7.42659	10.2817	8.1551	5.59542	3.50237	10.9852	1.63058	8.59377		22.2807	11.1835	11.1568	9.87727	13.0281	6.48592	2.47661	11.4512	3.25215	8.80769		23.7317	10.2287	10.1205	9.98871	12.7608	6.78901	3.1356	12.78	3.0719	7.39301		21.4324	11.1591	10.5944	9.59171	13.9048	7.25931	2.936	11.9991	3.6065	7.51661		29.5906	7.90979	9.69752	11.8461	9.97822	5.89577
34.3437	8.59185	7.46162	10.3463	8.6395	5.77174	3.51907	10.918	1.81472	8.59357		22.2253	11.2292	11.1948	9.81291	13.0136	6.59749	2.45922	11.3447	3.27664	8.84624		23.09	10.3868	10.1327	9.79911	12.9887	7.00181	3.3345	12.8428	3.2804	7.14311		21.8038	11.1556	10.4145	9.74061	13.8698	7.14361	2.8585	11.7443	3.5507	7.71851		30.0903	7.70736	9.70013	11.8741	9.80663	5.7915
35.0387	8.8927	7.38589	9.90929	8.5855	5.58017	3.65662	10.8503	1.77056	8.33023		22.6764	11.175	10.9212	9.95966	12.6165	6.43379	2.66808	11.2783	3.21028	9.06082		24.0565	10.2136	10.1223	10.0491	12.8129	6.57581	2.9992	12.5538	3.083	7.53371		21.363	11.0416	10.7394	8.91561	13.6402	8.29541	3.1749	12.3507	3.6685	6.81061		30.0121	7.82182	9.65545	11.7925	9.84666	5.80919
35.9286	8.32771	7.53333	10.2293	8.38681	5.59077	3.12055	10.5903	1.62201	8.67066		22.4813	11.1984	10.9774	9.99209	12.5224	6.46515	2.69677	11.354	3.17047	9.14201		24.2389	10.1255	9.96451	10.2271	12.8314	6.46881	2.976	12.551	3.0357	7.58101		21.6726	11.1237	10.5886	9.49022	13.8974	7.30868	2.91989	11.9685	3.61683	7.4135		29.9277	7.85801	9.61	11.7057	9.86541	5.98671
35.4634	8.52202	7.13607	10.5773	8.50078	5.43719	3.32567	10.4684	1.64877	8.92043		22.5444	11.1011	10.9842	10.0794	12.2823	6.47964	2.73267	11.3921	3.11935	9.28472		24.7002	9.92801	10.0469	10.5905	12.8931	6.10661	2.5486	12.5011	2.804	7.88091		21.6908	11.1854	10.7474	9.46981	13.8612	7.12691	2.8506	11.8701	3.6271	7.57061		29.735	7.79548	9.73187	11.7513	9.86809	5.94279
36.9818	8.2331	6.72011	10.8869	8.22343	5.0405	3.15379	9.94539	1.53683	9.27809		22.6461	11.138	10.8065	10.1686	12.5091	6.34503	2.70555	11.3139	3.13778	9.22942		23.0432	10.26	10.432	9.75191	12.9597	7.07361	3.1478	12.9733	3.227	7.13141		22.212	11.0871	10.4034	9.75581	13.8037	7.01961	2.7795	11.6578	3.5106	7.77041		30.001	7.73666	9.7122	11.7591	9.82572	5.91933
35.181	8.54015	7.28194	10.6702	8.75729	5.33884	3.13996	10.3767	1.70091	9.01307		22.3293	11.1816	10.8682	10.055	12.4224	6.56374	2.82826	11.3589	3.20306	9.18952		23.5286	10.1722	10.4091	9.90551	12.6847	6.73471	3.1252	12.9341	3.119	7.38681		21.789	11.1773	10.5303	9.66011	13.869	7.17561	2.8041	11.701	3.5646	7.72891		29.8495	7.78641	9.73594	11.6975	9.78905	5.9855
34.5071	8.52858	7.27912	10.5742	8.42795	5.77911	3.52561	10.9334	1.64839	8.79655		22.1606	11.2024	10.9923	9.85278	12.6059	6.68599	2.82716	11.4504	3.30011	8.92232		23.1863	10.3191	10.2817	9.83401	12.7083	6.90991	3.3225	12.8041	3.2559	7.37811		21.9565	11.1602	10.5767	9.62901	13.8476	7.04691	2.7887	11.831	3.5052	7.65811		29.2591	8.01643	9.87127	11.4992	10.1662	6.00227
35.8749	8.31185	7.3225	10.4329	8.33651	5.50114	3.23317	10.6671	1.57361	8.74638		22.5912	11.1783	10.9937	9.87399	12.9173	6.56896	2.50495	11.2709	3.23566	8.865		23.8664	10.0205	10.2025	10.0842	12.6053	6.77911	3.0776	12.7957	3.0734	7.49521		21.7144	11.1864	10.6141	9.49051	13.863	7.30731	2.8598	11.9229	3.5437	7.49781		29.6335	7.81772	9.85956	11.5777	9.90546	6.0232
34.791	8.44106	7.58482	10.0666	8.35501	5.86929	3.62071	11.3155	1.71239	8.24362		22.8628	11.0982	10.8565	10.0123	12.7595	6.40156	2.56989	11.3598	3.14908	8.93038		24.0893	10.0125	10.0457	10.281	12.5937	6.57841	3.0363	12.6667	3.0164	7.67991		21.9792	11.1865	10.342	9.71431	13.788	7.16351	2.8851	11.7221	3.4958	7.72341		29.3921	7.88859	9.82352	11.4859	10.0443	6.12887
33.1817	8.86584	7.54001	10.1847	8.76159	5.84637	3.94777	11.6158	1.85791	8.19829		22.2692	11.1361	10.8491	9.94508	12.8773	6.63643	2.74591	11.4323	3.32532	8.78317		24.5667	9.91141	10.0292	10.4815	12.6251	6.31171	2.7818	12.4838	2.9113	7.89741		21.8109	11.2331	10.3658	9.58681	13.9134	7.28591	2.9257	11.8106	3.5434	7.52431		29.9487	7.76825	9.66373	11.843	9.84914	5.81176
33.7428	8.81527	7.1682	10.8192	8.99484	5.46384	3.50428	10.6897	1.83322	8.96873		22.0963	11.2509	11.075	9.61731	13.3199	6.8621	2.54336	11.2865	3.47164	8.47697		24.038	9.97111	10.1104	10.3049	12.628	6.45661	3.0378	12.8402	3.0013	7.61161		21.639	11.1843	10.4171	9.48481	13.8061	7.56541	3.0006	11.8772	3.5815	7.44391		29.2375	7.88812	9.68956	11.6103	9.92147	6.24249
36.5628	8.10656	7.2425	10.4378	8.20648	5.38876	3.1878	10.4205	1.64904	8.79773		22.0987	11.347	10.965	9.68613	12.5811	6.72342	2.97398	11.4814	3.33313	8.81005		24.3635	9.94611	10.1435	10.3423	12.5945	6.39951	2.8624	12.5553	2.9807	7.81211		21.1054	11.278	10.3867	9.21331	13.8923	8.06611	3.2291	12.04	3.7095	7.07951		29.7841	7.77709	9.81127	11.673	9.84658	5.91003
35.5905	8.37065	7.11608	10.8277	8.53654	5.3315	3.1415	10.0876	1.73907	9.25892		22.1403	11.3929	10.9117	9.75776	12.7093	6.72894	2.84472	11.2381	3.3396	8.93674		24.8627	9.83151	10.0384	10.5946	12.6434	6.14141	2.6275	12.4296	2.8378	7.99301		20.7977	11.2778	10.7702	8.98581	14.103	7.84911	3.2301	12.3729	3.8414	6.77191		29.6655	7.88085	9.78884	11.7049	9.96125	5.89197
32.5933	9.13869	7.78598	9.79601	8.70017	6.13564	4.13424	12.0255	1.79494	7.89553		22.3374	11.3131	11.0197	9.84974	12.8232	6.56512	2.61154	11.257	3.24733	8.97589		24.2108	9.85031	10.0709	10.4634	12.5444	6.38591	2.97	12.9085	2.8982	7.69751		19.6212	11.5431	10.9815	8.61001	14.042	8.64751	3.4816	12.5385	3.9525	6.58201		29.5793	7.90924	9.74625	11.5508	10.0591	6.02594
34.8114	8.57002	7.25547	10.8723	8.68702	5.30142	3.18738	10.4443	1.65173	9.21896		22.4557	11.1912	10.9814	9.96343	12.494	6.47192	2.74852	11.4042	3.18879	9.10077		24.4047	9.86505	10.0276	10.5189	12.5351	6.35089	2.87564	12.7684	2.84023	7.81352		21.0166	11.3718	10.5578	9.22561	14.2212	7.46301	3.1803	12.1768	3.7954	6.99141		29.9099	7.79199	9.74017	11.718	9.82667	5.91673
32.0291	9.20594	7.4944	10.3287	8.91895	6.03177	4.08458	11.7333	1.82112	8.35214		22.3019	11.2095	10.9383	9.85722	12.8321	6.69697	2.68427	11.3344	3.29736	8.84801		24.9326	9.73221	9.88131	10.7356	12.325	6.13961	2.8184	12.4222	2.8443	8.16871		19.953	11.4751	10.913	8.54223	14.1675	8.51402	3.4899	12.7093	3.938	6.29797		29.7553	7.80512	9.66495	11.7381	9.92697	5.9848
33.9312	8.91614	7.16669	10.4235	8.8295	5.80368	3.66973	10.9268	1.74631	8.58649		22.3713	11.2112	11.0222	9.86358	12.7487	6.49541	2.70058	11.4135	3.27411	8.89947		24.8232	9.77521	9.96231	10.5938	12.4475	6.22421	2.8088	12.7411	2.7556	7.86821		18.997	11.5196	10.9209	8.25157	14.2542	9.32428	3.77996	12.653	4.28126	6.01822		30.0914	7.77969	9.66836	11.7567	9.88888	5.80692
35.7428	8.28845	7.1699	10.7814	8.46719	5.39655	3.10133	10.3471	1.60197	9.10325		22.3808	11.2084	10.912	9.99363	12.6634	6.43455	2.75097	11.3253	3.27157	9.05934		25.3142	9.72061	9.90151	10.7743	12.4475	6.03121	2.5674	12.4077	2.6777	8.15781		22.6286	11.1015	10.0025	9.33685	13.0122	8.12209	3.2284	11.5518	3.4091	7.60696		29.653	7.83984	9.64268	11.7754	9.92012	5.97739
34.0997	8.82321	7.09527	10.7803	8.98804	5.53094	3.40353	10.5337	1.76674	8.97854		22.6117	11.0783	11.0246	10.0293	13.0739	6.44821	2.33989	11.4286	3.13595	8.82961		24.7933	9.87111	9.99701	10.5777	12.5084	6.19021	2.7438	12.6499	2.736	7.93251		19.1207	11.3743	11.3761	8.03964	14.2528	9.26413	3.57824	13.0378	4.18679	5.76953		29.3098	7.90367	9.74003	11.5946	10.0485	6.10001
33.5047	8.58118	7.68643	10.6042	8.59944	5.80882	3.46532	11.1864	1.72418	8.83936		22.1577	11.2137	11.1611	9.65167	12.6807	6.79297	2.76452	11.5483	3.30432	8.72498		25.1587	9.72661	10.1096	10.686	12.5495	6.04991	2.462	12.4078	2.7244	8.12541		18.8217	11.4445	11.1531	8.23736	14.2348	9.53623	3.59093	12.9536	4.08583	5.942		28.9171	7.90869	9.77958	11.4736	10.0865	6.29673
											22.3475	11.2377	11.0651	9.80783	12.8982	6.49413	2.63829	11.3968	3.3023	8.81212		25.1578	9.74421	10.0329	10.7444	12.5033	6.04431	2.4979	12.4252	2.6813	8.16861		20.571	11.3242	10.6969	9.01381	14.1036	7.95741	3.3111	12.4517	3.8234	6.74681		29.4373	7.79648	9.71177	11.6486	9.87619	6.17252
											22.6368	11.0644	10.8245	9.93789	12.4839	6.72833	2.78059	11.392	3.20681	8.9447		24.0284	10.0243	10.275	10.2807	12.5392	6.58961	2.8535	12.6382	2.9294	7.84161		21.2382	11.2298	10.5724	9.26741	14.1848	7.51481	3.0763	12.2266	3.7267	6.96291		29.7765	7.84381	9.67705	11.7342	9.92147	5.89466
											22.1549	11.29	10.9827	9.85379	12.8662	6.55429	2.73031	11.3449	3.33718	8.88565		24.8275	9.86061	10.0809	10.4421	12.523	6.38901	2.6769	12.4784	2.8094	7.91211		21.6396	11.2773	10.4607	9.48541	13.9796	7.26231	2.9745	11.8764	3.6178	7.42631		29.6038	7.82897	9.71453	11.731	9.92894	5.9688
											22.191	11.2156	11.0796	9.75236	12.7642	6.60009	2.78252	11.4669	3.36261	8.78516		25.2606	9.73431	10.0388	10.7174	12.399	6.14151	2.476	12.2899	2.6828	8.25961		21.5043	11.2066	10.7436	9.37051	13.9341	7.25171	2.9375	11.9406	3.7028	7.40821		29.7929	7.80989	9.75582	11.7418	9.80282	5.91947
											22.0337	11.245	11.1058	9.68113	12.5409	6.74214	2.93222	11.5247	3.37092	8.82354		24.6506	9.86281	9.99281	10.6086	12.4538	6.26891	2.7805	12.5813	2.7818	8.01881		21.5307	11.2749	10.7453	9.26871	14.056	7.25381	2.9283	11.8954	3.7438	7.30301		29.5896	7.81357	9.61349	11.8187	9.91153	5.96274
											21.9848	11.378	11.2067	9.67965	13.4812	6.68294	2.35003	11.3709	3.31959	8.54619		24.9992	9.83471	9.97921	10.6268	12.4217	6.19661	2.6679	12.5846	2.6587	8.03051		21.9341	11.1982	10.5085	9.56631	13.8998	7.04731	2.8854	11.7716	3.6047	7.58401		29.754	7.71782	9.78588	11.8077	9.87479	5.88817
											22.585	11.1546	10.861	10.0903	12.7046	6.47918	2.58675	11.2095	3.18788	9.14116		25.3139	9.67201	9.99411	10.7781	12.3479	6.10271	2.5095	12.3862	2.6514	8.24411		21.8179	11.1702	10.5049	9.63271	13.9171	7.12091	2.8493	11.6702	3.6401	7.67661		29.9165	7.76855	9.74905	11.6572	9.80165	5.96598
											22.9808	10.9445	11.0927	10.2687	11.9415	6.27405	2.56828	11.2635	2.98117	9.68484		25.2156	9.68291	10.0052	10.8028	12.4107	6.05641	2.5091	12.4472	2.6521	8.21791		22.1867	10.9478	10.3643	9.16041	13.4906	8.08851	3.1185	12.1534	3.4953	6.99441		29.4915	7.94963	9.66156	11.7135	10.0469	5.95737
											22.4743	11.0382	11.1929	9.95148	12.415	6.5104	2.63657	11.4876	3.17792	9.11561		24.8864	9.76071	10.0729	10.6863	12.3048	6.11461	2.7075	12.7192	2.6564	8.09111		22.1033	11.0482	10.3707	9.82421	13.8119	7.12951	2.7586	11.746	3.4528	7.75471		29.0184	7.97292	9.72547	11.5128	10.116	6.30099
											22.3021	11.1949	11.1285	9.85559	12.6021	6.56995	2.6811	11.4232	3.23756	9.005		24.7907	9.78831	9.97591	10.6618	12.4361	6.32071	2.6943	12.6417	2.6854	8.00501		22.3751	11.0802	10.15	10.0249	13.5833	7.02882	2.79136	11.5097	3.36308	8.09343		28.9344	8.03121	9.836	11.4842	10.2391	6.17461
											22.1735	11.2246	10.9559	9.88245	12.8412	6.61195	2.73623	11.3392	3.35283	8.8822		25.4425	9.68271	9.89251	11.0394	12.5204	5.71881	2.3859	12.4736	2.5142	8.32991		22.2537	11.1304	10.203	9.93101	13.6124	7.08591	2.8248	11.5638	3.3853	8.00961		29.1494	7.97356	9.85286	11.6294	10.0477	6.07825
											22.5079	11.251	11.0553	9.88499	13.3272	6.47582	2.27855	11.2312	3.22858	8.75935		24.9689	9.73471	9.95461	10.7255	12.3745	6.12521	2.7182	12.6638	2.6835	8.05101		22.0793	11.1242	10.0742	9.93131	13.6632	7.34941	2.8864	11.5704	3.4078	7.91371		29.5941	7.90977	9.68784	11.6589	9.97957	5.98458
											22.3763	11.2146	11.0631	9.84874	12.9457	6.52576	2.55724	11.3856	3.26141	8.82156		24.8929	9.77401	10.0879	10.7224	12.5898	5.99801	2.5623	12.7805	2.6239	7.96821		22.1698	11.0732	9.90151	9.99221	13.5546	7.45501	2.9799	11.6463	3.3482	7.87921		30.0986	7.7041	9.67408	11.7897	9.75129	5.89084
											22.4862	11.1932	10.9268	9.97536	12.66	6.46685	2.69464	11.3979	3.19253	9.00637		24.9544	9.72111	10.0062	10.7324	12.2526	6.20391	2.6953	12.5167	2.7058	8.21151		22.1079	10.9929	9.68741	9.83311	13.2184	7.88881	3.3755	11.7385	3.4626	7.69481		29.8391	7.86398	9.73107	11.6928	9.91725	5.87794
											22.2059	11.3049	11.0739	9.67526	13.1512	6.76989	2.5349	11.3548	3.31749	8.61179		24.5834	9.76091	10.2033	10.6883	12.4094	6.33771	2.5627	12.6312	2.673	8.15001		22.9809	10.9688	9.32741	10.0998	13.1703	7.60541	3.21	11.2527	3.3481	8.03651		29.0542	8.02812	9.86323	11.4645	10.0987	6.14551
											22.3819	11.2447	10.936	9.98165	12.6569	6.43014	2.72541	11.386	3.20634	9.05111		23.7017	9.96311	10.3873	10.5142	12.5543	6.55221	2.7128	12.8906	2.7567	7.96701		22.9198	10.9821	9.43291	9.83471	12.9004	7.83701	3.4127	11.2914	3.4426	7.94631		30.1186	7.7017	9.65558	11.8174	9.84671	5.82893
											22.2186	11.2013	11.0356	9.9426	12.552	6.51202	2.77947	11.4169	3.2645	9.07699		23.7981	9.92491	10.4554	10.5366	12.5641	6.68051	2.5241	12.6618	2.7405	8.11391		23.2274	10.8607	9.37028	9.934	12.7256	7.78614	3.39587	11.2552	3.38586	8.05895		29.3509	7.80513	9.75441	11.6434	9.96685	6.05288
											22.8674	10.9872	10.9842	9.93276	12.3731	6.61823	2.66065	11.3249	3.18278	9.06876		24.057	9.84191	10.199	10.8592	12.5404	6.42711	2.5086	12.5962	2.6592	8.31131		23.1842	10.9554	9.36391	9.85791	12.7776	7.81241	3.4134	11.1911	3.4109	8.03311		29.8002	7.83658	9.74852	11.653	9.85793	5.98055
											22.3004	11.2582	11.0211	9.99821	12.8076	6.46512	2.56466	11.2997	3.20043	9.08469		21.9956	12.6118	10.7605	8.23151	15.0121	7.02781	2.6843	12.592	2.9687	6.11561		23.5004	10.8617	9.34855	9.91769	12.5801	7.86875	3.32831	11.0236	3.35002	8.22097		29.5612	7.82733	9.67238	11.7119	9.96945	5.99878
											22.557	11.0776	11.0397	9.88119	12.5658	6.59864	2.67948	11.4811	3.20332	8.91619		23.4174	11.9018	10.4997	8.72492	13.463	6.81665	2.9759	13.0715	2.4706	6.65848		23.3956	10.8152	9.47621	9.79761	12.6073	7.91151	3.3613	11.1818	3.4046	8.04881		29.3285	7.91737	9.7681	11.5273	9.97323	6.09585
											22.3478	11.2962	10.9078	9.88224	13.0358	6.55977	2.58995	11.3059	3.2608	8.81373		23.8568	11.4659	10.4895	9.05531	12.941	6.72391	2.9613	13.1676	2.3599	6.97871		23.1679	10.9801	9.35309	9.67355	12.7459	8.20756	3.42269	11.0451	3.4595	7.9446		29.3745	7.89368	9.63973	11.656	9.95649	6.13483
											22.085	11.3115	10.9659	9.73868	12.6583	6.81374	2.8615	11.3287	3.35334	8.88343		23.8468	11.5705	10.48	8.85591	12.8691	6.87531	3.0832	13.2652	2.3399	6.81401		23.4026	10.7265	9.50193	9.64229	12.4923	8.12347	3.4832	11.3346	3.44989	7.84316		29.5632	7.82795	9.76381	11.7188	9.97014	5.9593
											22.8206	10.9997	11.038	10.115	12.8889	6.35751	2.31415	11.3623	3.09642	9.00743		23.2114	11.6339	10.3324	9.29101	14.0159	6.61031	2.6408	12.5049	2.7456	7.01371		23.4656	10.9531	9.33216	9.83957	12.5586	7.87027	3.40467	11.0469	3.34995	8.1793		29.1469	7.90163	9.76019	11.5348	9.9486	6.23801
											22.1306	11.2218	10.9832	9.76904	13.0003	6.75344	2.69465	11.3959	3.37774	8.67337		22.0583	12.9534	10.3385	8.32811	15.3039	6.92431	2.7134	12.3741	2.8708	6.13511		23.6866	10.7933	9.40459	9.6809	12.4809	8.04044	3.41388	11.0393	3.44029	8.01963		29.8093	7.81233	9.69371	11.7521	9.92744	5.94936
											22.3564	11.1022	11.2157	9.87027	13.3032	6.54613	2.26017	11.4326	3.2521	8.6613		23.7402	9.84845	10.1309	10.9887	12.3744	6.56907	2.61418	12.6317	2.62679	8.47552		23.2626	10.8154	9.59477	9.51013	12.5913	8.15149	3.4848	11.3938	3.4732	7.72261		29.3811	7.92426	9.69352	11.7273	10.0732	5.95718
											22.2747	11.2888	10.8789	9.87987	12.7921	6.58994	2.76887	11.2393	3.33997	8.94767		23.1401	10.0513	10.4849	10.536	12.7327	6.67461	2.6797	12.839	2.8433	8.01831		23.3015	10.8474	9.55611	9.51671	12.7244	8.21001	3.3855	11.2969	3.4536	7.70781		29.7265	7.83734	9.73744	11.7091	9.93847	5.91353
											22.0773	11.0896	11.2408	9.90345	12.4508	6.65824	2.71749	11.4646	3.28609	9.11167		24.5157	9.83629	10.3006	10.6123	12.4739	6.34558	2.50131	12.4259	2.75746	8.23096		23.3646	10.842	9.50409	9.63696	12.6572	8.1334	3.36039	11.2241	3.40802	7.86937		29.3428	7.87318	9.80343	11.5204	10.0318	6.08206
											22.0217	11.3228	11.0663	9.70596	12.9359	6.69589	2.73998	11.359	3.39978	8.75266		24.9041	9.75171	9.98821	10.7607	12.4433	6.16061	2.6212	12.6429	2.6396	8.08761		24.2347	10.7029	9.30145	9.6829	12.402	7.99902	3.34635	11.058	3.31764	7.95511		29.7679	7.84085	9.69042	11.6815	9.88055	6.01758
											22.0888	11.3687	11.038	9.68557	13.1352	6.72464	2.61764	11.2346	3.40264	8.70428		26.7297	9.16641	9.27491	11.4791	12.6549	5.06061	2.4402	13.093	2.2754	7.82571		23.7474	10.7119	9.51894	9.60357	12.5013	8.16219	3.31604	11.1429	3.39877	7.89698		29.5391	7.8965	9.85642	11.5723	9.97474	6.01109
											21.9099	11.3725	11.0516	9.6739	12.7341	6.68444	2.92326	11.4318	3.41423	8.80426		24.5396	10.0207	10.1116	10.4155	12.5209	6.37471	2.7449	12.5187	2.7915	7.96181		23.7078	10.7142	9.51408	9.56263	12.4454	8.23109	3.374	11.2125	3.39031	7.848		29.401	7.80536	9.75585	11.6528	9.95088	6.07561
											22.7517	11.0295	10.7759	10.2126	12.5408	6.52766	2.58663	11.2536	3.10304	9.21861		25.616	10.0624	10.0686	10.7736	12.3843	5.88021	2.1863	12.1961	2.2835	8.54891		23.5239	10.7486	9.57761	9.47101	12.5058	8.23111	3.4467	11.2914	3.4684	7.73541		29.4951	7.849	9.72013	11.5856	9.94126	6.13088
											22.5083	11.0455	11.0074	9.99736	12.2624	6.61391	2.77969	11.4258	3.1796	9.18009		24.7663	9.91431	10.1446	10.27	12.481	6.44781	2.7806	12.6419	2.8153	7.73811		23.4	10.8531	9.57813	9.56493	12.6781	8.11704	3.33287	11.3802	3.34418	7.75147		29.2628	7.9205	9.72309	11.3935	10.0145	6.31726
											22.8784	10.9991	10.9269	10.0053	12.5349	6.62771	2.54794	11.3396	3.10928	9.03089		24.7321	9.87581	10.1795	10.5133	12.6111	6.31531	2.54	12.4753	2.7598	7.99771		23.5843	10.7962	9.48872	9.52394	12.5893	8.15259	3.42618	11.3851	3.37456	7.67919		29.5762	7.84708	9.68744	11.6319	9.95577	6.02963
											22.704	10.961	11.1168	9.94251	12.297	6.51514	2.70188	11.5387	3.15917	9.06389		24.1304	10.0648	10.1549	10.2055	12.5864	6.62261	2.9374	12.6863	2.9326	7.67901		23.6256	10.653	9.63143	9.76629	12.518	7.94379	3.2321	11.2539	3.35335	8.02258		29.2142	7.99201	9.82378	11.6401	10.0573	6.03361
											22.2917	11.2483	11.1734	9.70833	13.2515	6.64135	2.4016	11.4108	3.28434	8.58864		24.6448	9.94621	10.1263	10.3545	12.5206	6.33191	2.7974	12.5679	2.8638	7.84651		23.6666	10.7773	9.3835	9.60754	12.527	8.26697	3.39008	11.1864	3.36348	7.83118		29.7529	7.81064	9.74834	11.639	9.93739	5.96386
											22.2696	11.1109	10.9863	9.76375	12.8825	6.88221	2.67729	11.4704	3.32072	8.6363		24.4736	10.0128	10.0347	10.3299	12.5494	6.51211	2.8614	12.5425	2.8758	7.80771		23.0365	10.8083	9.64794	9.48563	12.8213	8.37838	3.34438	11.3749	3.48737	7.61538		30.1483	7.76917	9.62575	11.8059	9.80428	5.78417
											22.2168	11.2158	10.8895	9.84942	12.5175	6.76296	2.90452	11.3429	3.32854	8.97198		24.5486	9.92071	10.0766	10.5032	12.6946	6.38361	2.6464	12.3433	2.9	7.98291		23.8437	10.6701	9.44471	9.76111	12.6359	7.83041	3.3041	11.4558	3.2814	7.77271		29.5305	7.8699	9.79707	11.6842	9.9774	6.01834
											23.1006	10.9967	10.8151	10.0875	12.367	6.43571	2.64706	11.2712	3.10439	9.17474		24.0246	10.0621	10.0481	10.4356	12.7461	6.41881	2.8904	12.7014	2.9058	7.76701		24.3748	10.4796	9.44041	9.57371	12.6202	7.86541	3.3158	11.5584	3.3271	7.44451		29.3629	7.88999	9.81528	11.5814	9.9645	6.09212
											22.7655	11.225	10.8976	10.0089	12.6	6.39988	2.59811	11.251	3.10881	9.14524		23.863	10.1528	10.1176	10.2413	12.7605	6.57581	2.965	12.7434	2.956	7.62451		26.8656	9.86769	8.81738	10.1082	12.1616	7.13144	3.06122	11.2653	2.9842	7.73736		29.6741	7.87469	9.70447	11.7382	9.9177	5.9732
											22.2718	11.2111	10.9615	9.90753	12.9223	6.60766	2.62416	11.372	3.27508	8.84686		23.6229	10.2062	10.3041	10.0797	12.879	6.54931	2.9875	13.0168	2.9675	7.38691		25.9867	10.0122	8.7727	10.1137	12.2817	7.32763	3.3095	11.4988	3.08116	7.6158		29.7519	7.84616	9.71961	11.6599	9.97346	5.9246
											22.3471	11.2271	10.9572	9.88015	12.6669	6.58602	2.74916	11.2952	3.29984	8.9913		24.1609	10.1875	10.2681	10.1215	12.6261	6.43091	2.9077	12.9735	2.7743	7.54941		26.2061	9.93391	9.04873	9.79308	12.1348	7.48201	3.27976	11.6626	3.07322	7.38589		29.6322	7.84254	9.8048	11.6265	9.85491	6.03741
											22.1315	11.2876	11.1852	9.71664	13.4089	6.60306	2.3827	11.4567	3.30739	8.5202		23.9917	10.0874	10.3031	10.2061	12.6382	6.52981	2.8672	12.7641	2.9121	7.70021		25.832	10.1101	8.99711	9.70131	12.3631	7.66441	3.3168	11.4414	3.2211	7.35261		30.0861	7.69439	9.66307	11.797	9.77339	5.89594
											22.6659	11.1325	11.0077	9.88898	12.7832	6.45309	2.58616	11.4167	3.20688	8.85891		23.5344	9.99133	10.4303	9.90363	12.2518	7.21882	3.16791	12.9339	3.04621	7.52162		25.5449	10.3676	9.13971	9.60601	12.2804	7.56551	3.3751	11.3321	3.2352	7.55341		29.2737	7.79762	9.82609	11.5952	9.9602	6.16451
											22.3303	11.2895	11.0525	9.59556	12.8797	6.76001	2.72269	11.5204	3.28332	8.56609		23.4582	10.1904	10.2527	9.84571	12.7305	7.08151	3.1712	12.7883	3.1735	7.30791		26.2124	10.3052	9.03362	9.58764	12.0866	7.4415	3.35578	11.2871	3.11983	7.57033		29.1398	8.0271	9.84612	11.45	10.0676	6.19778
											22.5914	11.3058	10.8411	9.80414	12.8955	6.63596	2.64039	11.1505	3.28072	8.85449		22.4952	10.219	10.3937	9.48621	12.6478	7.67741	3.6004	13.15	3.4366	6.89361		25.8559	10.3599	9.00532	9.84499	12.3391	7.36409	3.19014	11.1499	3.10753	7.78317		29.4825	7.86398	9.81695	11.6261	9.91276	5.99943
											22.4621	11.2087	10.8294	9.79006	12.5773	6.76986	2.87134	11.2029	3.36899	8.91931		22.8983	10.3131	10.315	9.59701	12.8872	7.29751	3.3899	12.9188	3.375	7.00811		27.5814	10.0032	8.98051	9.61001	11.7441	7.19331	3.1485	11.2098	2.9043	7.62481		29.711	7.7722	9.75619	11.6805	9.90911	5.97175
											22.1371	11.1996	10.9577	9.78248	12.4889	6.81135	2.94129	11.4385	3.34517	8.89781		23.5886	10.1837	10.1387	9.86331	12.7323	7.11511	3.1881	12.6644	3.1995	7.32621		26.996	10.1192	8.88051	9.81211	11.8799	7.25601	3.1818	11.1494	2.9277	7.79731		29.956	7.73931	9.6891	11.7199	9.81751	5.92665
											22.134	11.2849	10.9592	9.86727	12.6096	6.6174	2.8505	11.3583	3.31337	9.00544		23.8327	10.1614	10.2646	9.89831	12.7897	6.78241	3.0539	12.8057	3.0976	7.31361		24.2588	10.6184	9.35161	9.49641	12.4557	7.95091	3.5101	11.8062	3.2014	7.35041		29.6814	7.84039	9.6279	11.7265	9.93976	5.97076
											22.273	11.2148	10.9535	9.83934	12.6946	6.59823	2.81641	11.4681	3.29937	8.84272		23.8069	10.1767	10.3614	9.95851	12.8223	6.79771	2.8783	12.6727	3.0454	7.48001		21.9997	11.0323	10.249	9.22241	13.1942	7.97201	3.4294	12.4408	3.4145	7.04561		29.731	7.743	9.82132	11.6787	9.85763	5.97783
											22.2695	11.2153	10.9868	9.75625	12.5203	6.87984	2.81459	11.3246	3.29828	8.93458		24.1898	10.1461	10.2757	10.2292	12.8057	6.40521	2.7217	12.6135	2.8825	7.73051		22.0544	11.0353	10.3204	9.30751	13.3359	7.79221	3.2632	12.3793	3.384	7.12771		29.2222	7.92575	9.8004	11.5511	10.0034	6.12051
											22.0056	11.2615	11.0813	9.63256	12.8449	6.93244	2.76343	11.3682	3.41154	8.69851		23.6213	10.133	10.3108	10.0241	12.7748	6.82801	2.9865	12.817	3.0543	7.45011		22.0503	11.1144	10.3591	9.27701	13.3809	7.78201	3.2001	12.3778	3.3239	7.13441		29.6367	7.88234	9.75938	11.6321	9.95793	5.9746
											22.5446	11.1791	11.0304	9.86483	12.6479	6.5736	2.63204	11.3683	3.1974	8.96184		23.6105	9.91751	10.2909	10.0359	12.6359	6.88321	3.1496	13.1283	3.0901	7.25801		22.3284	10.9287	10.217	9.12761	13.0364	8.41361	3.3018	12.3293	3.2995	7.01761		29.9228	7.68486	9.70104	11.7733	9.74645	5.92052
											22.5089	11.0742	10.935	10.022	12.4243	6.49978	2.78917	11.3905	3.23685	9.11928		24.1841	9.89081	10.1671	10.3815	12.5942	6.53751	2.8481	12.7976	2.8845	7.71451		22.0307	11.0292	10.4229	9.31981	13.3997	7.74341	3.1557	12.1801	3.4624	7.25601		29.8241	7.82623	9.77223	11.6882	9.83654	5.96774
											21.9032	11.3557	11.009	9.62638	12.7992	6.85945	2.90572	11.4305	3.41693	8.69391		23.7856	9.99681	10.1491	10.2352	12.7307	6.66831	3.0249	12.858	3.0374	7.51391		22.3109	11.0802	10.3416	9.42831	13.3678	7.45371	3.1237	12.0111	3.4328	7.44981		29.1848	7.89588	9.72371	11.509	10.0273	6.21507
											22.148	11.2742	10.9497	9.71352	12.6956	6.78197	2.88663	11.368	3.38852	8.79393		23.69	10.0898	10.2221	10.0643	12.5994	6.82581	3.111	12.8476	3.0531	7.49681		22.1451	11.0951	10.2533	9.16195	13.3268	8.11114	3.24576	12.1096	3.43339	7.11784		29.7474	7.81863	9.71453	11.6789	9.92076	5.93753
											22.2789	11.2725	11.0011	9.70029	12.6109	6.81536	2.80997	11.4416	3.25879	8.81059		25.0688	9.81101	10.0698	10.6918	12.5917	5.98361	2.5108	12.4117	2.7302	8.13051		21.8592	11.1301	10.4144	9.14641	13.5686	8.04021	3.1401	12.1781	3.4775	7.04531		29.5727	7.82303	9.80157	11.6436	9.91409	6.04293
											22.5753	11.1814	10.8891	10.0252	12.5263	6.39512	2.74661	11.3285	3.19923	9.13325		24.8926	9.76601	9.93341	10.6592	12.5906	6.11001	2.7277	12.6478	2.7828	7.88981		23.1953	11.1326	9.781	9.02203	12.4938	8.5777	3.49743	11.6999	3.21854	7.38162		29.7788	7.78959	9.81936	11.5976	9.87397	6.01868
											22.6802	11.1407	10.8326	10.0964	12.6874	6.40767	2.61359	11.2086	3.1984	9.13436		25.1561	9.61531	10.0513	10.8194	12.5028	5.99311	2.4956	12.5297	2.7001	8.13651		23.1574	10.8869	9.94041	8.81345	12.7158	8.57916	3.57644	12.1545	3.38396	6.79194		29.2913	7.96722	9.73512	11.6043	10.0011	6.0529
											22.2221	11.2573	11.0314	9.90934	12.9362	6.65624	2.52349	11.3356	3.21061	8.91771		24.4829	9.73901	10.1339	10.6386	12.6271	6.16071	2.7226	12.8956	2.7858	7.81371		22.6435	11.0452	9.85015	9.18255	13.0294	8.07388	3.57136	12.2665	3.35513	6.98242		29.4504	7.95008	9.77135	11.6339	9.99088	6.03609
											22.1732	11.2392	11.0025	9.7935	12.9191	6.73413	2.67097	11.3006	3.36192	8.80495		24.8652	9.64111	9.98221	10.7832	12.4494	6.08541	2.714	12.7588	2.7298	7.99081		21.9864	11.1054	10.115	9.09931	13.173	8.38471	3.4609	12.2863	3.409	6.97991		29.6257	7.87367	9.73184	11.731	9.96958	5.91828
											22.1632	11.4019	10.9653	9.81238	13.3616	6.55456	2.48157	11.198	3.34549	8.71596		25.5568	9.49991	9.91851	10.9127	12.3496	5.90411	2.5136	12.5583	2.6185	8.16791		23.8174	10.83	9.78258	9.30338	12.8088	7.66605	3.35298	11.8162	3.32557	7.29707		29.9804	7.81456	9.73537	11.6317	9.84338	5.90185
											22.1511	11.4264	11.0754	9.65845	13.1687	6.71019	2.53772	11.1808	3.35647	8.73478		24.9366	9.70311	9.97691	10.8136	12.4824	6.01631	2.6403	12.7521	2.6423	8.03631		26.3287	10.4533	9.01833	9.82176	12.1639	7.01903	3.17738	10.9644	3.05963	7.99352		28.419	8.09637	9.80657	11.3682	10.2237	6.44977
											22.2472	11.2686	10.9693	9.77089	12.6213	6.69481	2.8435	11.3518	3.32854	8.90403		24.8965	9.59181	10.0287	10.8536	12.4039	6.05071	2.6462	12.8312	2.651	8.04631		26.5505	10.3786	9.03422	9.83359	12.0853	6.88739	3.18134	10.9572	3.07312	8.01872		28.8773	7.98072	9.75616	11.4934	10.0941	6.24941
											22.3129	11.2041	11.0938	9.65722	12.4066	6.68722	2.94386	11.4628	3.36069	8.8709		24.7228	9.75711	10.1421	10.6496	12.4994	6.08811	2.6746	12.6955	2.769	8.00171		27.0342	10.2701	8.89734	10.1311	12.0274	6.71871	2.94626	10.5977	2.97489	8.40224		29.559	7.91419	9.79487	11.5993	10.0099	6.01598
											22.1651	11.2916	11.1021	9.67105	12.9676	6.61311	2.70791	11.4296	3.38232	8.66965		25.034	9.75361	9.93041	10.7798	12.366	5.95111	2.7374	12.5765	2.7206	8.15051		27.3494	10.1666	8.88459	9.85309	11.953	6.9253	3.06512	11.0312	2.88518	7.88649		28.9567	8.01624	9.81309	11.3904	10.0922	6.25708
											22.5808	11.2061	10.8729	9.90456	12.4952	6.54557	2.80863	11.2384	3.26997	9.07784		24.9628	9.79071	10.0409	10.6249	12.4065	6.13631	2.686	12.5635	2.7326	8.05571		27.6642	9.99841	8.73711	9.87991	11.8239	7.05171	3.1139	11.0123	2.889	7.82951		29.9814	7.74745	9.68786	11.7315	9.81488	5.91975
											22.4215	11.1719	10.9578	9.94601	12.698	6.48389	2.70836	11.4306	3.23526	8.94665		24.672	9.84031	10.0962	10.6289	12.5006	6.14221	2.6973	12.4687	2.8412	8.11251		22.5713	10.834	10.0521	9.23331	12.9627	8.20241	3.4294	12.157	3.4413	7.11641		29.2899	7.91495	9.76221	11.4979	9.99996	6.20552
											22.3047	11.2494	11.0151	9.77534	12.7357	6.57454	2.77702	11.3918	3.33222	8.84403		24.6073	9.75741	10.1066	10.5949	12.4792	6.33981	2.7066	12.6454	2.7981	7.96461		22.3003	11.1137	10.3975	9.37171	13.3608	7.52371	3.0815	12.1497	3.3289	7.37211		29.2361	7.92185	9.81122	11.4658	10.0305	6.20782
											22.4029	11.1899	10.949	9.87884	12.711	6.49408	2.77291	11.3619	3.32735	8.91212		24.2146	9.88211	10.2047	10.3084	12.3826	6.64601	2.9242	12.6731	2.9402	7.82401		22.6469	10.9577	9.98491	9.18011	13.0356	8.36831	3.3307	12.1489	3.2877	7.05911		29.7791	7.81549	9.64304	11.8384	9.85837	5.91672
											22.0346	11.2358	11.0834	9.63992	12.7744	6.86114	2.82401	11.4837	3.39296	8.6701		24.4817	9.91351	10.2289	10.3631	12.3927	6.39931	2.8144	12.6194	2.8587	7.92821		22.6282	10.9637	10.1718	9.34141	13.0745	7.93691	3.1851	12.2863	3.1833	7.22871		29.4195	7.9253	9.75888	11.6597	10.0145	6.01801
											22.7703	11.1488	10.7105	10.1824	12.4171	6.54518	2.66631	11.2938	3.00899	9.25667		24.6045	9.92191	10.1318	10.3617	12.3525	6.48791	2.8231	12.4504	2.879	7.98711		22.5485	10.8312	9.97602	9.18255	12.7962	8.56103	3.473	12.3345	3.27626	7.02082		29.657	7.85158	9.71671	11.7037	9.93955	5.99846
											22.2461	11.28	11.0193	9.80489	12.5946	6.58678	2.82209	11.4744	3.25187	8.91989		24.7105	9.83551	10.2224	10.3119	12.4461	6.49051	2.7244	12.5092	2.8863	7.86311		22.3791	10.8723	9.90791	9.05441	12.8223	8.79571	3.6029	12.0787	3.4925	6.99411		29.7762	7.88191	9.66436	11.7553	9.9114	5.91823
											22.4839	11.1875	11.0904	9.75569	13.2432	6.60357	2.395	11.2987	3.3186	8.62329		25.1615	9.80451	10.2306	10.5137	12.4332	6.20031	2.4559	12.3734	2.6988	8.12801		22.0784	10.806	9.89711	9.14341	13.1169	8.90071	3.5085	11.8971	3.6639	6.98791		28.7963	8.02306	9.80109	11.3443	10.2103	6.35114
											22.5898	11.1459	11.007	9.94388	12.6742	6.53239	2.57771	11.3198	3.18572	9.02364		24.9793	9.79481	10.3326	10.4884	12.4521	6.34691	2.3924	12.2836	2.7456	8.18421		22.4804	10.6825	10.0092	9.18766	13.0115	8.50602	3.4629	11.8677	3.69825	7.09383		28.4457	8.05242	9.75672	11.2622	10.1697	6.61806
											22.6899	11.1427	10.9237	9.91649	12.812	6.55476	2.56029	11.3292	3.19156	8.87933		24.9762	9.77761	10.1094	10.5001	12.2208	6.33581	2.7352	12.4619	2.7806	8.10231		22.6783	11.0518	10.1548	8.68447	12.5978	8.97096	3.51131	12.0359	3.34392	6.97073		29.8352	7.76655	9.72792	11.6454	9.87815	5.96872
											22.2156	11.3366	10.8906	9.89211	12.6875	6.6706	2.76221	11.2257	3.26991	9.04929		24.6957	9.85241	10.2708	10.5115	12.398	6.35051	2.5694	12.4134	2.7709	8.16731		21.0761	11.2588	10.6222	8.69616	13.7856	8.33038	3.4562	12.6389	3.71135	6.4244		29.624	7.84614	9.72168	11.6856	9.95091	6.026
											22.4947	11.2554	10.9304	9.88935	12.5194	6.56786	2.76166	11.3685	3.17381	9.03886		24.4833	9.84611	10.197	10.4772	12.4462	6.41381	2.7311	12.7176	2.7708	7.91681		21.7347	11.1326	10.5592	8.69771	13.3956	8.31861	3.4523	12.4668	3.63	6.61241		29.1293	7.94526	9.76837	11.5667	10.0909	6.13026
											22.4873	11.2127	11.0894	9.79881	12.5719	6.64565	2.653	11.3292	3.2129	8.99922		25.2735	9.62321	9.99471	10.7102	12.1123	6.34661	2.6172	12.5001	2.6091	8.21301		20.6863	11.3159	10.6969	8.70126	13.5138	8.51472	3.58652	12.7366	3.66564	6.58243		28.6576	8.04169	9.79865	11.3563	10.1467	6.37506
											22.4929	11.0889	11.0597	9.84673	12.4299	6.62227	2.7767	11.5449	3.20437	8.93367		24.947	9.74621	10.2992	10.4862	12.2969	6.34171	2.5486	12.4224	2.7624	8.14931		21.6745	11.1321	10.2221	8.8934	13.1021	8.4211	3.71955	12.579	3.52611	6.72996		29.679	7.89412	9.70032	11.71	9.97917	5.91829
											22.4015	11.0603	11.2021	9.57113	12.2689	7.13559	2.79352	11.664	3.1669	8.73608		24.4918	9.96961	10.399	10.3589	12.5134	6.46121	2.5241	12.4068	2.7921	8.08301		22.2537	10.9978	9.97751	8.89891	13.0108	8.41581	3.7845	12.3051	3.6272	6.72861		29.4232	7.95883	9.79414	11.5628	10.0019	6.06541
											22.2435	11.2644	10.9803	9.65425	12.9056	6.75478	2.78108	11.4896	3.34665	8.57983		24.6729	9.82971	10.2053	10.4874	12.4352	6.39661	2.6401	12.5544	2.7683	8.01001		22.3185	10.9526	10.2553	8.69296	12.9637	8.65375	3.60753	12.425	3.52821	6.60243		29.691	7.85615	9.73223	11.6561	9.98997	6.00448
											22.4768	11.1571	11.0246	9.85715	12.7811	6.67659	2.57224	11.3041	3.24405	8.90632		24.8084	9.73691	10.1314	10.6441	12.3497	6.26781	2.643	12.6402	2.695	8.08341		20.2745	11.4297	10.9119	8.78931	13.8374	8.38201	3.3369	12.6815	3.656	6.70071		29.6801	7.83051	9.75343	11.714	9.88035	5.9947
											22.2794	11.2888	11.0431	9.94118	12.4982	6.5063	2.729	11.3347	3.18809	9.19117		24.36	9.88341	10.312	10.5106	12.4856	6.48601	2.5698	12.468	2.7929	8.13161		19.5201	11.4378	11.2659	8.45161	13.8787	8.64185	3.54332	12.9652	3.91399	6.38149		28.4557	8.04875	9.77306	11.3751	10.1959	6.46506
											22.3442	11.218	10.8646	10.0052	12.6145	6.49514	2.79412	11.4283	3.21072	9.02514		23.5998	9.92751	10.436	10.46	12.4279	6.84491	2.7039	12.7988	2.7727	8.02841		21.1202	11.231	11.0317	8.85521	13.7645	7.87711	3.1167	12.6284	3.5851	6.79001		29.7438	7.89136	9.73253	11.595	9.98597	6.02599
											22.299	11.2327	11.0711	9.85364	13.1349	6.59443	2.44438	11.3454	3.25901	8.76542		24.1387	9.85811	10.2354	10.7024	12.398	6.42971	2.6499	12.6603	2.7074	8.22001		21.3224	11.2233	10.9261	9.14241	13.9022	7.58511	2.9149	12.2714	3.5817	7.13041		28.9293	7.93128	9.78323	11.428	10.0963	6.36317
											22.4986	11.1742	10.9426	9.99058	12.634	6.47694	2.67523	11.3392	3.20655	9.06194		23.6391	9.92151	10.3874	10.6768	12.5155	6.62631	2.5846	12.7265	2.712	8.21021		21.4063	11.2802	10.854	9.07871	13.814	7.55051	3.0417	12.3718	3.5497	7.05301		29.7442	7.91216	9.68632	11.6453	9.95406	6.00338
											22.3719	11.026	10.99	10.0765	12.6111	6.62939	2.61385	11.5148	3.14405	9.0225		21.9236	12.7001	10.3552	8.57521	15.1658	6.94011	2.7048	12.5061	2.8621	6.26691		21.4661	11.3191	10.7476	9.03711	13.9735	7.52811	3.0718	12.156	3.6948	7.00581		29.5119	7.8956	9.68303	11.6023	10.0544	6.09397
											22.6888	11.0318	10.8717	10.0941	12.4561	6.48648	2.70237	11.3059	3.19737	9.16534		22.7649	12.0812	10.5589	8.38201	13.7414	7.34471	3.0929	13.1946	2.6052	6.23411		21.4466	11.2801	10.878	9.07501	13.8813	7.46261	3.0116	12.2724	3.615	7.07731		30.0529	7.73281	9.70527	11.7023	9.76918	5.97609
											22.5004	11.271	10.8462	9.8813	12.5725	6.61706	2.7923	11.1448	3.29314	9.08129		23.6552	11.821	10.5349	8.37141	12.9952	7.26681	3.2246	13.4374	2.3604	6.33301		20.8865	11.3126	10.9021	8.96531	13.9721	7.86761	3.1132	12.468	3.66	6.85251		29.4556	7.85381	9.70845	11.764	10.0228	5.99586
											22.3716	11.2908	10.9986	9.85463	12.8242	6.61696	2.59449	11.2478	3.23632	8.96452		22.6403	12.3749	10.4968	8.4042	14.2976	7.06753	2.90879	12.8451	2.69604	6.26877		21.2352	11.3239	10.9447	8.90041	13.8303	7.68881	3.1158	12.3854	3.6486	6.92681		29.7602	7.76608	9.70478	11.8342	9.89282	5.91811
											22.6688	11.1682	10.9552	9.95562	12.3513	6.47399	2.75818	11.2949	3.17973	9.19416		23.8791	11.2331	10.5195	8.86421	12.5673	7.23811	3.1575	13.2425	2.4631	6.83551		21.5085	11.2654	10.6893	9.17291	13.7495	7.51221	3.12	12.3054	3.554	7.12271		29.1137	7.92065	9.76217	11.4628	10.0381	6.30518
											22.3207	11.2328	11.0027	9.78015	12.7383	6.65517	2.74346	11.3717	3.3118	8.84327		22.5898	11.6818	10.37	9.21831	13.6879	7.02261	2.9206	12.3692	2.9241	7.21561		20.8047	11.3028	10.7733	9.05421	13.8162	7.94781	3.2367	12.5443	3.6079	6.91201		29.3427	7.93867	9.68615	11.5977	10.0504	6.13098
											22.654	11.2366	10.9467	9.76422	12.9865	6.65664	2.52231	11.1549	3.29319	8.78482		22.8316	11.0373	10.534	9.58951	13.2638	7.13511	2.7426	12.5318	2.8569	7.47731		20.4371	11.3991	11.0344	8.92661	13.8469	8.02961	3.1826	12.6006	3.6234	6.91961		29.7051	7.82965	9.77869	11.7328	9.85741	5.95153
											22.6339	11.3988	10.8296	9.78814	12.5362	6.55184	2.8223	11.1623	3.22424	9.0527		24.2272	9.94701	10.3923	10.3365	12.4793	6.62181	2.6335	12.6095	2.7911	7.96171		20.9225	11.3662	10.6255	9.03481	13.5334	8.05591	3.4006	12.578	3.508	6.97501		29.8246	7.78366	9.70577	11.7618	9.83799	5.98297
											22.578	11.1879	11.1258	9.86118	12.9836	6.4628	2.40679	11.2408	3.24684	8.90645		24.7942	9.79711	10.1983	10.8003	12.1959	6.13831	2.5386	12.4713	2.6015	8.46441		20.6685	11.2147	10.5159	8.69266	13.2235	9.17875	3.64874	12.5892	3.61643	6.65164		29.9211	7.73377	9.72007	11.7785	9.83078	5.9363
											22.4354	11.1546	10.9399	10.0259	12.5344	6.4127	2.76582	11.4505	3.20024	9.08044		25.5259	9.50681	10.1143	11.3548	11.8628	5.67621	2.245	12.2855	2.3374	9.09121		21.8864	10.9167	10.0343	8.62331	12.7374	9.37881	3.8827	12.5241	3.5481	6.46811		29.1654	7.96493	9.78405	11.4421	9.94849	6.26764
											22.2724	11.1476	10.9513	10.0004	12.5557	6.56232	2.77931	11.4775	3.22036	9.03316		24.4729	9.87471	10.2693	10.4312	12.6	6.47481	2.5883	12.5958	2.7876	7.90531		23.6163	10.5609	9.60464	8.94181	12.6397	8.73146	3.67934	12.0771	3.4825	6.66625		29.6615	7.81904	9.73352	11.6383	9.96696	6.05499
											22.111	11.2983	10.9317	9.96829	12.5798	6.50341	2.8537	11.3725	3.27385	9.10754		23.8724	10.0695	10.2364	10.1879	12.6677	6.62271	2.9595	12.8062	2.9737	7.60391		22.9358	10.6426	9.68505	9.07978	12.6583	8.782	3.72575	12.1094	3.52143	6.85984		29.377	7.88965	9.79573	11.5806	9.95736	6.15321
											22.063	11.2992	11.3219	9.70984	13.1989	6.63728	2.3697	11.363	3.2986	8.73871		23.7311	10.1452	10.1677	9.97321	12.4037	6.90361	3.2673	12.7854	3.0877	7.53501		23.3058	10.7258	9.52075	9.46522	12.6571	8.447	3.44618	11.5767	3.38384	7.47161		29.6798	7.87629	9.57867	11.6918	9.93043	6.06569
											22.2595	11.1445	10.9567	9.90904	12.4858	6.69934	2.83924	11.4096	3.28363	9.01268		23.8364	10.0656	10.1373	10.1415	12.4734	6.73061	3.1681	12.7613	3.06	7.62571		22.8872	11.0021	9.55059	9.48744	12.7668	8.58461	3.34169	11.1652	3.41675	7.79768		29.0097	7.92724	9.79695	11.4769	10.0102	6.31978
											22.8704	11.146	10.7996	10.1436	12.3937	6.22898	2.73721	11.2072	3.15725	9.31601		23.3739	10.1143	10.2898	10.0934	12.6001	6.87731	3.1339	12.9631	3.0402	7.51391		23.7382	10.6858	9.59207	9.64119	12.5626	7.98002	3.28342	11.2642	3.38576	7.86677		29.4181	7.93624	9.7497	11.5548	9.96744	6.11268
											22.0479	11.3199	11.1103	9.57457	12.8378	6.8015	2.81151	11.5227	3.36403	8.60971		24.2837	10.005	10.1842	10.2919	12.5685	6.56291	2.8138	12.5629	2.9062	7.82081		22.87	10.7752	9.66128	9.60763	12.9647	8.28457	3.28374	11.5047	3.45688	7.59131		29.5065	7.8809	9.64715	11.5919	9.92524	6.08097
											22.6632	11.0537	10.8528	10.2072	12.2792	6.54773	2.66807	11.2754	3.06959	9.38303		24.5624	9.97851	10.2082	10.2531	12.6515	6.47541	2.7047	12.4726	2.909	7.78451		23.4719	10.7394	9.55727	9.608	12.7397	8.15062	3.28398	11.3004	3.41256	7.73617		29.6253	7.8515	9.77072	11.6844	9.93665	5.95259
											22.4596	11.1123	11.1078	9.81439	12.428	6.58271	2.78633	11.5861	3.20537	8.91744		25.4071	9.59561	10.4134	10.0873	11.0028	6.70031	3.1464	13.4489	2.3322	7.86591		23.1114	10.7047	9.61411	9.57508	12.6556	8.34654	3.40175	11.3403	3.51402	7.73647		29.7021	7.83299	9.60332	11.7188	9.87978	6.07655
											22.0353	11.1601	11.1211	9.93778	12.8962	6.61004	2.59007	11.5069	3.26563	8.87693		24.1206	9.94051	10.1892	10.4341	12.5145	6.47761	2.8501	12.7738	2.8447	7.85481		23.3293	10.7475	9.76739	9.33367	12.6619	8.3644	3.34744	11.3832	3.49672	7.56854		29.3479	7.7724	9.82787	11.5035	9.90688	6.25063
											22.5856	11.1254	10.8561	10.133	12.4519	6.45779	2.70078	11.3208	3.13148	9.23712		24.1369	9.99333	10.4156	10.2294	12.3085	6.62802	2.82161	12.8355	2.76921	7.86182		23.5229	10.8332	9.57336	9.71992	12.7313	8.01973	3.15317	11.1269	3.32554	7.99402		29.5041	7.85814	9.72588	11.6706	9.94863	6.02341
											22.2183	11.3001	10.9747	9.87926	12.9113	6.56871	2.64657	11.3007	3.28915	8.91122		24.6535	9.85261	10.3598	10.1585	12.4328	6.44621	2.7891	12.7291	2.8945	7.68381		23.1494	10.2889	10.7752	9.77429	12.6655	7.44421	2.67636	11.2855	3.60961	8.33102		29.7071	7.80588	9.68064	11.6509	9.86287	6.10826
											22.1585	11.2228	11.1758	9.71139	12.8518	6.76613	2.61343	11.4988	3.26617	8.73518		23.4123	10.1459	10.287	9.68911	12.7324	7.17581	3.2906	12.8907	3.282	7.09411		23.5276	9.59005	11.6771	10.1132	12.8321	6.27303	2.09841	10.9121	4.10192	8.87464		29.8438	7.78194	9.69782	11.7523	9.79843	6.00138
											22.1059	11.2419	11.0283	9.71024	12.579	6.82803	2.88439	11.4689	3.33252	8.82076		24.0067	10.0312	10.2288	10.1218	12.7802	6.68921	2.8957	12.6156	3.0768	7.55391		23.64	10.9422	9.84881	9.07403	12.4852	8.23165	3.42785	11.666	3.29034	7.39386		29.1637	7.87194	9.76583	11.4439	10.0397	6.30919
											22.4959	11.1896	10.9473	10.0289	12.7118	6.42447	2.61286	11.4209	3.13701	9.03119		24.2123	10.0086	10.041	10.4627	12.8057	6.26071	2.8526	12.642	2.9506	7.76371													29.6117	7.83532	9.79337	11.6342	9.90129	6.0661
											22.7158	11.2441	10.9124	10.0334	12.8412	6.24085	2.53285	11.1854	3.19454	9.09958		23.9697	9.98391	10.164	10.2666	12.7872	6.52681	2.9356	12.7411	3.0487	7.57631													29.7878	7.77472	9.73265	11.8045	9.83877	5.95531
											22.3408	11.2568	10.9927	9.8441	12.8551	6.5832	2.64513	11.3092	3.28655	8.88645		24.3705	9.98311	10.1592	10.3717	12.8471	6.22491	2.7563	12.6271	2.9543	7.70571													29.5731	7.82223	9.64304	11.7161	9.88568	6.08433
											22.4369	11.2092	10.8713	9.95022	12.8656	6.55573	2.64466	11.3664	3.2255	8.87463		24.9642	9.89831	9.97211	10.5102	12.7016	6.10061	2.6853	12.4029	2.8716	7.89311													29.5481	7.81842	9.73546	11.6245	9.91259	6.0752
											22.2722	11.1351	11.0416	9.79004	12.7042	6.82786	2.69849	11.4107	3.29828	8.82147		24.1138	9.97091	10.1997	10.3271	12.8505	6.34091	2.8351	12.6749	3.0373	7.64971													29.5462	7.83815	9.71562	11.6138	9.96902	6.09435
											21.3428	11.3514	11.1881	9.55681	13.3846	7.02359	2.70363	11.3858	3.62145	8.44179		24.1474	9.95011	10.0556	10.3055	12.7478	6.51041	2.961	12.6677	3.0538	7.60061													29.6325	7.86358	9.86211	11.5273	9.88221	6.0864
											21.2704	11.3819	11.231	9.41806	13.1471	7.09284	2.90431	11.5357	3.63486	8.38377		24.045	9.91611	10.0962	10.5021	12.734	6.29051	2.9089	12.9306	2.9006	7.67591													29.796	7.88648	9.6812	11.6568	9.95227	5.95582
											22.8791	11.1824	10.7991	10.1425	12.8314	6.28582	2.4688	11.1925	3.0968	9.12159		24.3492	9.94461	10.0249	10.4712	12.7503	6.24921	2.8572	12.727	2.909	7.71731													29.7747	7.77292	9.72848	11.7032	9.92272	6.0204
											22.2836	11.1015	11.0207	9.87251	12.6072	6.63022	2.79526	11.4723	3.32196	8.89482		24.0591	9.94771	10.16	10.2666	12.6522	6.54161	2.973	12.738	3.0363	7.62541													29.8184	7.85493	9.6841	11.6979	9.85824	5.99474
											22.6431	11.2225	10.8691	9.9171	12.6373	6.56084	2.68148	11.1409	3.25338	9.07428		23.7456	10.0118	10.3933	10.145	12.7809	6.57291	2.9061	12.9412	3.0167	7.48641													29.6341	7.82883	9.71098	11.6486	9.97743	6.0162
											22.5259	11.1784	10.8544	9.97996	12.8719	6.56398	2.59542	11.236	3.25135	8.94273		23.9831	9.99581	10.4081	10.1877	12.7024	6.45701	2.835	12.8382	2.9733	7.61931													29.7711	7.75875	9.7552	11.717	9.88642	6.01645
											22.6266	11.3048	10.9111	9.73657	12.6383	6.57488	2.77981	11.2673	3.26886	8.89175		25.0341	9.83221	10.1056	10.4082	12.4982	6.30681	2.6505	12.3787	2.8469	7.93871													29.9037	7.75555	9.69781	11.7305	9.83634	5.94281
											22.2643	11.1342	11.1358	9.88256	12.5843	6.54488	2.71774	11.3787	3.32104	9.0365		24.3932	9.98161	10.2475	10.2137	12.5811	6.45731	2.8321	12.58	2.9657	7.74771													29.5926	7.90879	9.75329	11.6476	9.98893	6.01358
											22.4459	11.2301	10.9991	10.0515	12.8471	6.38862	2.49377	11.3287	3.1372	9.07806		23.8475	10.0696	10.3142	10.0159	12.6596	6.75921	3.0019	12.837	3.0355	7.45951													28.9031	7.97022	9.81262	11.4687	10.085	6.32604
											22.481	11.0605	10.9426	9.98548	12.4866	6.55666	2.77965	11.5242	3.20131	8.98199		24.2343	9.96871	10.1377	10.2566	12.5974	6.52811	2.9414	12.6996	2.9748	7.66131													29.6716	7.83635	9.71905	11.6625	9.92153	5.99475
											22.2814	11.0767	10.9956	10.1112	12.3445	6.50953	2.78724	11.4185	3.20958	9.26586		24.1851	10.0011	10.1336	10.3506	12.6391	6.45971	2.8733	12.6697	2.9242	7.76351													29.3687	7.90028	9.70361	11.6509	10.0215	6.14635
											22.2528	11.1931	11.0278	9.90297	12.6173	6.69938	2.68831	11.3058	3.26139	9.05116		24.1096	10.0634	10.2815	10.1934	12.4883	6.76061	2.8141	12.5528	2.8909	7.84531													29.5892	7.81238	9.76825	11.6679	9.94878	6.05564
											22.0327	11.303	10.9911	9.75351	12.6562	6.78768	2.86579	11.444	3.31578	8.85021		25.0751	9.72831	10.224	10.4937	12.3086	6.43761	2.5075	12.3799	2.7197	8.12551													29.6582	7.8621	9.69675	11.7193	9.9313	6.02086
											21.9992	11.3787	10.9572	9.82452	12.744	6.70206	2.80634	11.4379	3.24834	8.9018		25.0447	9.76041	10.118	10.501	12.2832	6.36631	2.6537	12.4193	2.7644	8.08891													29.6867	7.7985	9.75643	11.7526	9.86335	5.92919
											22.2532	11.1313	11.2159	9.83856	12.659	6.65029	2.59807	11.4312	3.25452	8.96787		24.3867	9.82311	9.95061	10.5143	12.2246	6.46681	3.0845	12.725	2.898	7.92631													30.1778	7.80353	9.69601	11.6961	9.87193	5.82304
											22.8156	11.1337	10.7836	10.1007	12.6032	6.40178	2.63808	11.2925	3.11872	9.11214		25.2122	9.72471	10.0737	10.7385	12.344	6.04201	2.5263	12.3977	2.674	8.26681													29.7738	7.85586	9.70335	11.6629	9.91059	5.97896
											22.9911	11.1288	10.7792	10.0983	12.4216	6.42718	2.6374	11.0991	3.12373	9.29366		24.6568	9.86821	10.0019	10.597	12.3747	6.33581	2.7833	12.6884	2.6933	8.00051													29.3954	7.86087	9.81446	11.5921	9.92167	6.13739
											22.3402	11.1954	11.0472	9.87085	12.5353	6.51557	2.7885	11.458	3.25314	8.99582		25.0587	9.79701	10.0971	10.6598	12.3781	6.20981	2.5212	12.3734	2.6736	8.23121													29.6758	7.92997	9.67563	11.6654	9.98674	5.9507
											22.3194	11.1623	11.1203	9.89093	13.2002	6.55721	2.36923	11.3602	3.26815	8.75208		24.2346	9.90571	10.3442	10.4669	12.4597	6.52901	2.6244	12.5509	2.798	8.08651													29.2752	7.91133	9.70095	11.6457	9.99217	6.18501
											22.5646	11.3034	10.861	9.87066	12.5599	6.56035	2.77418	11.217	3.2244	9.06446		26.0197	9.34111	10.0797	10.8842	12.0967	6.05111	2.2817	12.3492	2.5248	8.37171													29.5976	7.79585	9.75904	11.6992	9.91585	6.08247
											22.236	11.2824	10.9775	9.79983	12.7071	6.6621	2.77808	11.2935	3.33261	8.93085		25.7693	9.34351	9.96831	10.8526	12.1672	6.12621	2.4759	12.6594	2.5422	8.09531													29.7642	7.80632	9.67375	11.6834	9.91216	6.0414
											21.9857	11.2911	11.1554	9.88659	13.0301	6.61387	2.4977	11.3981	3.24583	8.89557		24.3528	9.92051	10.2862	10.5556	12.3951	6.51061	2.5686	12.501	2.6985	8.21101													29.7311	7.92428	9.69608	11.6991	9.9384	5.91616
											22.331	11.3031	11.0676	9.6194	12.9901	6.58353	2.70926	11.3997	3.38678	8.60945		23.6361	10.1307	10.4603	10.1799	12.2213	6.9411	2.89517	12.9864	2.67738	7.87157													29.623	7.82547	9.72243	11.6846	9.79803	6.04791
											22.0954	11.371	11.1091	9.77119	12.9046	6.57921	2.64452	11.3321	3.29994	8.89291		26.4767	9.82548	10.5412	9.29558	10.0134	7.12794	3.4414	13.995	1.80857	7.47461													29.576	7.86153	9.70095	11.5985	9.92276	6.13211
											22.0895	11.2891	11.0611	9.79698	12.6566	6.68733	2.78055	11.3264	3.33167	8.98077		24.0916	9.87459	10.2587	10.66	12.4544	6.51822	2.61203	12.6128	2.72485	8.19285													29.0182	7.9886	9.88138	11.4328	10.0695	6.28096
											22.4713	11.2683	11.0114	9.89457	13.113	6.49719	2.41986	11.1715	3.26195	8.89089		24.3675	9.86831	10.3897	10.5315	12.5107	6.42731	2.4919	12.5024	2.7567	8.15391													29.2836	7.89194	9.70459	11.6385	10.034	6.1568
											22.1778	11.2574	11.0954	9.73702	12.7506	6.55605	2.79629	11.3536	3.41394	8.86197		24.584	9.81741	9.96821	10.6042	12.429	6.35991	2.8324	12.7985	2.723	7.88331													29.1692	7.94057	9.7198	11.5842	10.0498	6.1432
											22.575	11.126	11.0326	9.83833	12.5699	6.49163	2.74758	11.3984	3.28651	8.93392		24.6294	9.81651	10.0961	10.5838	12.4972	6.34061	2.6782	12.5453	2.7939	8.01891													29.0438	7.99149	9.94641	11.3969	10.0363	6.23051
											22.4809	11.1772	11.1572	9.88373	13.246	6.45251	2.28061	11.2867	3.25016	8.78478		25.0493	9.81223	9.93029	10.5728	12.4385	6.33368	2.68005	12.3561	2.7803	8.04674													29.6402	7.88797	9.75121	11.6415	9.93725	6.06863
											22.1539	11.2528	11.0642	9.66162	13.0516	6.87792	2.60578	11.4266	3.32444	8.58107		24.5277	9.91021	9.99681	10.4996	12.4765	6.40771	2.8425	12.615	2.8165	7.90741													29.3764	7.97137	9.7582	11.4741	10.0275	6.17454
											22.249	11.4421	10.9595	9.6452	12.5962	6.64317	2.92976	11.266	3.35352	8.91549		25.2527	9.46581	9.97751	10.958	12.3536	6.05571	2.5005	12.5537	2.6563	8.22611													29.3071	7.92591	9.69394	11.6701	10.0305	6.06966
											22.1437	11.3329	11.1743	9.70883	12.9716	6.69084	2.54702	11.3356	3.28586	8.80934		25.1088	9.52151	10.0499	10.8368	12.3282	6.03031	2.6189	12.6832	2.7056	8.11671													29.3709	7.9279	9.73157	11.4567	10.0549	6.18223
											22.3605	11.1253	11.0269	10.0436	12.6931	6.395	2.64246	11.4616	3.20944	9.04202		24.422	9.56511	10.1247	10.8712	12.4119	6.14871	2.7302	12.8123	2.8098	8.10401													29.0419	7.94836	9.74204	11.5655	10.0619	6.15998
											22.437	11.1885	10.8454	10.1408	12.5403	6.37662	2.7427	11.4315	3.12506	9.17218		25.3299	9.75661	10.1176	10.3201	11.714	6.48001	2.922	12.824	2.5475	7.98821													28.9284	7.99544	9.84116	11.4327	10.0559	6.33962
											22.4519	11.1527	10.8062	9.98644	12.702	6.64993	2.72932	11.2683	3.27277	8.98052		24.1395	10.0522	10.1836	10.3091	12.563	6.43781	2.911	12.7821	2.8672	7.75441													29.7652	7.8101	9.78557	11.5888	9.87718	6.04864
											22.7212	11.1588	10.7885	10.1429	12.4394	6.45105	2.68303	11.2048	3.11519	9.29499		24.2386	10.0503	10.097	10.3217	12.7522	6.46651	2.8274	12.4426	3.0056	7.79801													29.7545	7.81815	9.77224	11.582	9.85054	6.08617
											22.0457	11.3008	11.1662	9.76101	13.4111	6.68499	2.35131	11.3614	3.30907	8.6085		24.2803	10.0796	10.085	10.1712	12.6309	6.59301	2.9519	12.6108	2.9646	7.63261													29.6206	7.89682	9.72326	11.5975	10.0357	6.02917
											21.9275	11.34	10.9719	9.76836	12.5653	6.74639	2.96985	11.4001	3.3683	8.94229		23.8459	10.1574	10.1061	10.0721	12.7577	6.77281	3.0549	12.6009	3.1076	7.52451													29.1743	7.91839	9.77948	11.4781	10.0529	6.24812
											22.2326	11.2367	10.928	9.76718	12.5993	6.74716	2.89664	11.42	3.33194	8.84049		23.1358	10.3282	10.3823	9.75231	12.7273	7.01921	3.2601	12.8472	3.2272	7.32031													29.4335	7.89087	9.76533	11.5618	9.99484	6.15001
											22.0067	11.2677	11.1542	9.70469	12.961	6.75165	2.6474	11.4293	3.35688	8.72044		24.0278	10.0672	10.0087	10.2364	12.7296	6.70961	2.9878	12.5233	3.0616	7.64791													29.7441	7.82548	9.71577	11.7153	9.90619	5.9736
											22.4786	11.1722	10.945	9.96609	12.6241	6.59809	2.65209	11.3503	3.17545	9.03805		23.0658	10.1682	10.3807	9.89871	12.6196	7.08441	3.2515	13.1294	3.1029	7.29871													29.8166	7.80154	9.67249	11.6333	9.88802	6.06701
											22.4177	11.1888	11.0193	9.85906	12.6973	6.56747	2.68563	11.3476	3.27599	8.94115		24.5596	9.95233	10.102	10.3123	12.3934	6.44352	2.91121	12.6508	2.85731	7.81742													29.3799	7.89186	9.77934	11.5158	10.0149	6.14488
											22.6717	11.1111	10.8688	9.97534	12.9187	6.55813	2.52633	11.2232	3.2522	8.89454		24.4411	10.0023	10.0249	10.1756	12.8975	6.47371	2.8921	12.5776	3.0634	7.45171													29.3376	7.87248	9.85683	11.4231	9.99413	6.28624
											22.8452	10.9833	10.8823	10.04	12.8744	6.64859	2.40142	11.2372	3.16944	8.9181		23.6781	10.1349	10.2251	10.0455	13.0194	6.75441	2.936	12.6734	3.1541	7.37901													29.1181	8.04665	9.82275	11.4197	10.1647	6.16115
											22.4351	11.2407	11.0793	9.81888	13.0458	6.6442	2.41877	11.202	3.25961	8.85565		23.8726	10.1472	10.3057	10.0598	13.0026	6.55611	2.8452	12.6625	3.0945	7.45371													29.0635	7.95137	9.758	11.4522	10.0334	6.26478
											22.0302	11.3219	10.9583	9.76098	12.7982	6.77314	2.81874	11.3742	3.34884	8.81548		23.5136	10.2722	10.0141	10.0084	12.8532	6.65591	3.33	12.7128	3.2712	7.36851													29.3483	7.9174	9.79777	11.5432	9.98999	6.10304
											22.4203	11.1625	11.0303	9.89866	13.001	6.54735	2.5051	11.4171	3.2306	8.78692		23.5885	10.1087	10.1572	10.1498	12.8572	6.69181	3.0699	12.8033	3.1211	7.45241													29.3275	7.90274	9.73905	11.5725	10.0031	6.13524
											22.6852	11.1905	10.9127	9.98549	12.76	6.43031	2.56923	11.2883	3.16583	9.01236		23.7527	10.0986	10.1399	10.2647	12.8727	6.50321	2.9817	12.7339	3.0718	7.58071													28.9609	7.97785	9.82672	11.4685	10.0826	6.34221
											22.7238	11.127	11.137	10.0971	13.5333	6.26081	1.94345	11.2218	3.10415	8.85157		23.758	10.137	10.2722	10.2118	12.7986	6.47921	2.9296	12.8329	2.98	7.60061													29.3224	7.94353	9.71753	11.5839	10.0409	6.17534
											22.158	11.2297	11.0851	9.82322	12.6886	6.60521	2.75052	11.388	3.32843	8.94315		24.9653	9.81191	10.0455	10.6217	12.5212	6.13591	2.6156	12.4097	2.7882	8.08491													29.6735	7.8882	9.65616	11.7079	9.90158	6.07504
											22.4565	11.2932	11.0408	9.8174	13.0195	6.46866	2.52289	11.2248	3.29396	8.86228		24.734	9.82161	10.0742	10.5691	12.6031	6.15601	2.6993	12.5677	2.8433	7.93161													30.1265	7.76975	9.61573	11.7527	9.78854	5.90037
											22.2788	11.2727	11.0444	9.84067	12.9498	6.63189	2.54814	11.2413	3.2881	8.90422		24.8132	9.94371	10.0355	10.5089	12.5549	6.20051	2.6994	12.4128	2.8164	8.01461													29.4468	7.88411	9.75466	11.5616	9.94688	6.17678
											22.0713	11.4004	10.9804	9.78155	12.6708	6.61693	2.85832	11.2949	3.33661	8.98883		23.9483	9.92531	10.1222	10.3661	12.5348	6.52111	3.0469	12.9047	2.9604	7.67011													29.009	8.03206	9.77044	11.5481	10.1173	6.15268
											21.6789	11.3367	11.2828	9.48061	13.4384	6.9215	2.5485	11.3835	3.54922	8.37988		24.781	9.85341	9.97781	10.6068	12.4739	6.24481	2.7388	12.4464	2.8147	8.06231													29.3022	7.87939	9.79228	11.4615	10.0239	6.20322
											22.5317	11.3051	10.9605	9.76443	12.9767	6.71378	2.51127	11.2647	3.19498	8.7769		24.6668	9.80431	10.0156	10.6771	12.2818	6.43891	2.7114	12.5387	2.6886	8.17671													29.3887	7.87374	9.68584	11.6541	9.99186	6.13134
											21.8592	11.316	11.3991	9.55531	13.4763	6.71449	2.36267	11.3655	3.45976	8.49159		25.1349	9.73351	10.0728	10.7289	12.4511	6.15491	2.4611	12.4216	2.6454	8.19571													29.6599	7.80414	9.61384	11.8043	9.81475	6.00974
											21.7638	11.3593	11.0439	9.50976	12.9347	7.01676	2.90908	11.3024	3.56721	8.593		24.7118	9.86981	10.0328	10.5437	12.4182	6.27281	2.7872	12.7483	2.7036	7.91171													29.4856	7.94319	9.71307	11.5592	9.9691	6.12581
											21.9009	10.6492	10.3785	10.4163	13.3826	7.36602	2.55576	11.8869	3.16774	8.29616		24.3303	9.86091	10.2879	10.5215	12.5135	6.39951	2.6384	12.6157	2.8008	8.03141													29.1655	7.90962	9.72616	11.5851	10.0353	6.20728
											22.435	11.2518	11.0831	9.79437	12.9865	6.52535	2.52366	11.2949	3.28439	8.82095		24.0098	9.95191	10.5611	10.2694	12.5142	6.63321	2.6149	12.7408	2.8062	7.89841													29.6031	7.8398	9.76527	11.5902	9.87818	6.17945
											22.499	11.3084	10.8117	9.87487	12.8394	6.51719	2.73175	11.3283	3.23875	8.85055		24.1588	9.88901	10.2587	10.5734	12.3769	6.57831	2.6664	12.6367	2.7213	8.14041													29.0629	7.98493	9.83966	11.4191	10.1031	6.28533
											22.1513	11.2989	11.1574	9.71516	13.0257	6.60495	2.58702	11.4264	3.3156	8.71761		23.5744	9.90307	10.4089	10.56	12.4613	6.7819	2.67084	12.861	2.72377	8.05484													29.5196	7.9127	9.73517	11.5495	9.93578	6.19155
											22.3749	11.0671	11.1424	9.97924	12.4478	6.49526	2.68542	11.3712	3.26147	9.1751		24.7976	9.91031	10.5986	9.79311	11.3869	7.04111	3.0403	13.2454	2.4552	7.73141													29.6068	7.87235	9.82173	11.557	9.86224	6.04888
											22.4081	11.16	11.0004	9.97012	12.348	6.50894	2.81709	11.3654	3.22837	9.19356		25.6303	9.86431	10.5365	9.66571	10.9407	6.93211	3.114	13.4504	2.1953	7.67061													29.4368	7.90174	9.75125	11.5869	10.005	6.11974
											22.497	11.1068	10.9526	10.0203	12.8952	6.53534	2.50989	11.2999	3.23012	8.95275		23.9715	9.98041	10.4419	10.3532	12.5939	6.67631	2.5938	12.5878	2.8276	7.97351													29.3543	7.89153	9.82686	11.5942	9.97007	6.14831
											22.2168	11.2856	11.1669	9.739	13.4832	6.63785	2.28215	11.2508	3.33942	8.59834		24.1173	9.91341	10.3101	10.414	12.4592	6.56621	2.7478	12.7158	2.8179	7.93821													29.5821	7.85633	9.85226	11.5573	9.94427	6.06031
											22.3522	11.2569	11.1734	9.7802	13.4634	6.53884	2.24055	11.3672	3.24704	8.58027		23.5192	10.1104	10.5503	10.3217	12.5017	6.57511	2.7748	13.0852	2.7029	7.85861													29.7861	7.77764	9.70662	11.7051	9.88634	5.98577
											22.6089	11.2001	10.9252	9.96537	12.4852	6.49595	2.7142	11.2789	3.17994	9.14618		24.531	9.86921	10.1942	10.4326	12.4477	6.41941	2.7395	12.6873	2.7822	7.89681													29.6084	7.86155	9.72969	11.6089	9.90952	6.07811
											22.5334	11.2019	10.9948	9.78752	12.75	6.66035	2.64447	11.265	3.28349	8.87905		25.0527	9.75031	9.94901	10.7582	12.5148	5.98791	2.6399	12.6094	2.6919	8.04581													29.7464	7.80672	9.75725	11.6214	9.85316	6.026
											22.4833	11.1759	11.1168	9.88586	13.2149	6.48563	2.31752	11.4101	3.19055	8.71944		24.6718	9.80561	10.0028	10.5263	12.3657	6.37361	2.8625	12.6415	2.8232	7.92691													29.8484	7.85411	9.60745	11.7229	9.91227	5.99207
											22.3627	11.3352	10.9133	9.79753	12.5723	6.56272	2.87226	11.3224	3.28649	8.97505		24.144	9.99521	10.1358	10.2124	12.4701	6.64811	3.0231	12.6147	3.0211	7.73541													29.4246	7.93576	9.77613	11.5999	10.0136	5.98477
											22.1531	11.2784	10.9063	9.82147	12.7337	6.64394	2.86783	11.35	3.37285	8.87239		25.1377	9.70511	9.94141	10.7382	12.398	6.21841	2.5907	12.4579	2.6789	8.13361													29.7201	7.83461	9.67545	11.7146	9.86247	6.01947
											22.1478	11.2135	11.0626	9.74757	12.9396	6.74791	2.66545	11.4375	3.34104	8.69692		23.8081	10.0161	10.3385	10.2317	12.6327	6.57001	2.9163	12.9055	2.9411	7.63991													29.4813	7.79062	9.68612	11.5992	9.92966	6.20827
											22.2971	11.0669	10.9294	9.98425	12.4329	6.74262	2.81661	11.4401	3.24448	9.04582		24.1688	9.99701	10.169	10.2168	12.6108	6.62691	2.9124	12.7217	2.9429	7.63361													29.4172	7.87048	9.72976	11.4864	10.0063	6.2141
											23.0884	11.2102	10.6842	10.2667	12.8912	6.09831	2.40462	10.9756	3.09912	9.2816		23.5462	10.0813	10.5102	10.1343	12.7041	6.68631	2.8465	12.9228	2.9516	7.61661													29.3938	7.80582	9.74495	11.5765	9.92226	6.14851
											23.1541	10.8216	10.8541	10.3532	12.4557	6.23949	2.45727	11.3627	3.02004	9.28184		24.1631	10.0901	10.2532	10.2137	12.5493	6.48671	2.8884	12.6334	2.9279	7.79411													29.8619	7.86651	9.69344	11.6717	9.94838	5.93406
											22.2273	11.3208	11.0787	9.85755	13.1805	6.5394	2.42941	11.2454	3.27658	8.8444		24.2868	9.99101	10.2638	10.2499	12.6656	6.41571	2.8067	12.7241	2.9138	7.68251													29.4177	7.95831	9.83037	11.5966	9.96719	5.97963
											22.5764	11.1843	10.884	9.83794	12.856	6.65937	2.63979	11.2927	3.2715	8.79801		24.3041	10.1163	10.2284	10.1726	12.7223	6.40541	2.8249	12.5679	2.9582	7.69981													29.6048	7.87117	9.61364	11.6759	9.96151	6.01758
											22.3345	11.2739	11.0727	9.63287	13.1652	6.69035	2.56256	11.2874	3.40078	8.57978		23.9699	10.2257	10.2298	10.0308	12.6007	6.58831	3.047	12.6187	3.0401	7.64891													29.9607	7.76195	9.68404	11.7726	9.80314	5.91307
											22.338	11.125	11.1106	9.96124	12.5185	6.54778	2.66362	11.5156	3.15762	9.06212		23.9847	10.3092	10.2878	10.0495	12.9766	6.46801	2.7934	12.5346	3.0037	7.59241													29.6212	7.8727	9.75317	11.4886	9.92708	6.16415
											22.3261	11.1299	10.9777	9.9032	12.6091	6.67598	2.74848	11.4528	3.25036	8.92621		22.8957	10.3193	10.6553	9.58541	12.8842	7.21591	3.1017	13.0039	3.2099	7.12861													29.3108	7.94676	9.7483	11.4821	10.0556	6.21723
											22.4823	11.0974	11.0526	9.94754	12.7606	6.51299	2.573	11.4679	3.1969	8.90877		23.0034	10.2615	10.5501	9.62111	12.7556	7.17861	3.2292	12.9315	3.2856	7.18331													29.8151	7.81595	9.72634	11.6926	9.90735	5.95747
											22.3221	11.219	10.9183	10.1054	12.4895	6.52786	2.69713	11.3109	3.13569	9.27416		23.4138	10.488	10.2529	9.64581	12.6515	6.90831	3.3705	12.7446	3.2064	7.31811													29.4989	7.84977	9.68603	11.6646	9.96134	6.13091
											22.4793	11.1612	10.9854	10.0027	12.5736	6.45677	2.67609	11.3709	3.18946	9.10446		23.832	10.3328	10.5642	9.70951	12.8939	6.67011	2.8618	12.6817	3.0837	7.37021													29.7231	7.83242	9.62424	11.7366	9.90836	6.05381
											22.509	11.1831	10.9815	9.89239	12.7577	6.57738	2.61208	11.3553	3.21228	8.91931		23.7523	10.2546	10.2621	9.74931	12.7525	6.89561	3.1611	12.638	3.2221	7.31231													29.248	7.92742	9.75726	11.4978	10.064	6.23639
											22.5671	11.2225	10.9204	10.0114	12.6023	6.40398	2.66963	11.2846	3.17759	9.14052		23.3941	10.2353	10.3937	9.65941	12.6376	7.08611	3.2703	12.8804	3.2281	7.21491													29.1641	7.93213	9.78276	11.4981	10.016	6.22722
											22.5101	11.2749	10.8306	9.89886	12.621	6.54303	2.79606	11.2974	3.23518	8.99277		29.5655	8.37343	11.1761	9.86513	9.96643	5.83152	2.09031	12.8235	2.06311	8.24492													29.5713	7.85361	9.78116	11.6311	9.92747	6.07567
											22.2533	11.1645	11.0831	9.81706	12.7884	6.59317	2.69974	11.406	3.35014	8.84438		24.7103	10.0626	10.0138	10.3012	12.5783	6.43491	2.7919	12.3978	2.8578	7.85131													29.86	7.80419	9.66336	11.7582	9.88038	5.99263
											22.3428	11.3152	10.9879	9.87527	12.9732	6.4538	2.59443	11.3148	3.25979	8.88286		24.3974	9.97061	10.0494	10.3864	12.7346	6.44781	2.789	12.6245	2.8834	7.71681													29.0989	7.95617	9.7978	11.4237	10.0892	6.22126
											22.5637	11.1442	10.8359	10.1341	12.6468	6.39825	2.65363	11.3718	3.13757	9.11415		24.8519	9.94871	9.98841	10.3655	12.5888	6.59941	2.6516	12.3651	2.7833	7.85721													29.3306	7.91662	9.66995	11.5647	9.97868	6.23039
											22.4477	11.1747	10.8709	10.041	12.4144	6.54146	2.79834	11.2778	3.21478	9.21907		24.5148	9.86061	10.1281	10.4873	12.5419	6.46391	2.694	12.5831	2.8071	7.91911													29.1816	7.88221	9.67165	11.5934	10.0077	6.19578
											22.5246	11.1365	11.1369	9.91354	13.1945	6.43756	2.30293	11.3478	3.22645	8.77933		24.0397	9.50521	10.2091	10.8756	12.3853	6.86741	2.5164	12.6928	2.7146	8.19381													29.7976	7.78814	9.66234	11.7663	9.88085	5.97953
											22.2402	11.2752	11.0275	9.68078	12.6746	6.76088	2.81675	11.4458	3.30695	8.77133		24.8931	9.92871	10.0726	10.3592	12.5614	6.50481	2.6242	12.3407	2.8065	7.90871													29.1497	7.90132	9.74806	11.5138	10.013	6.29219
											22.4564	11.1595	11.0633	9.86477	12.6182	6.56154	2.67365	11.4481	3.21071	8.94379		24.8688	9.81893	10.0681	10.5949	12.6304	6.33138	2.51226	12.4465	2.72877	7.99992													29.4941	7.91082	9.72616	11.5864	9.98988	6.11148
											22.1267	11.1645	11.2051	9.78973	13.1706	6.68413	2.43203	11.3644	3.3556	8.7072		24.8954	9.82021	10.0729	10.564	12.4838	6.25761	2.6345	12.6219	2.6918	7.95781													29.2095	7.95148	9.70468	11.586	10.007	6.23239
											22.3822	11.2271	11.0298	9.67093	12.8362	6.68517	2.73365	11.3001	3.40289	8.73193		24.7474	9.75751	10.0455	10.7071	12.4939	6.14201	2.677	12.7317	2.7021	7.99571													29.8521	7.84963	9.69722	11.6967	9.89755	5.92673
											22.3187	11.2548	10.9877	9.87431	12.5844	6.48319	2.81731	11.3833	3.28443	9.01189		23.7744	9.96021	10.5198	10.4252	12.5929	6.68391	2.5492	12.7114	2.7698	8.01311													29.2518	7.92891	9.63336	11.5938	10.0497	6.20025
											22.6047	11.2465	11.1463	9.84182	13.091	6.38753	2.34717	11.2511	3.21715	8.86681		23.4273	10.6939	10.5033	9.8796	13.0267	6.84008	2.62313	12.5325	2.77496	7.69846													29.4346	7.94932	9.73796	11.5029	10.0104	6.18298
											22.535	11.1966	10.9661	9.79257	12.6556	6.7117	2.69168	11.2407	3.28441	8.92564		22.5635	12.6755	10.4922	8.22026	14.8647	7.02712	2.72215	12.4916	2.81707	6.12594													30.0273	7.83913	9.62174	11.7483	9.88086	5.8986
											22.2484	11.3427	11.1437	9.76785	13.3097	6.5756	2.35024	11.2612	3.27521	8.72537		21.9429	12.9347	10.4454	8.18111	15.1813	7.29451	2.6967	12.3706	2.8575	6.09521													29.3417	7.91078	9.75892	11.5772	10.0385	6.18454
											22.3985	11.1759	11.0676	9.80043	12.432	6.64551	2.80558	11.437	3.24911	8.98836		22.7091	11.5292	10.492	9.11961	13.4987	7.17681	2.9315	12.5288	2.8978	7.11641													29.6357	7.86299	9.67367	11.5856	9.94669	6.10881
											22.626	11.1771	10.8958	9.94115	12.6603	6.6389	2.61192	11.2381	3.18215	9.02857		23.6474	10.2713	10.2836	10.4586	12.7375	6.61637	2.62146	12.6988	2.64697	8.01783													29.79	7.85333	9.67665	11.6437	9.89686	6.0413
											22.4994	11.2601	10.9963	9.87746	13.181	6.54106	2.38539	11.1541	3.2675	8.83772		24.164	9.81238	10.4077	10.5071	12.5639	6.455	2.58752	12.854	2.74015	7.9082													29.4673	7.91509	9.69325	11.5917	9.97	6.13763
											21.8983	11.6679	11.278	9.79629	12.7235	6.46067	2.55034	11.1126	3.16118	9.35129		25.0071	9.81361	10.2091	10.5698	12.4601	6.20551	2.4779	12.3072	2.7521	8.19751													29.5193	7.86917	9.71863	11.5642	9.96724	6.14651
											22.2654	11.1568	11.1511	9.91901	13.1197	6.56282	2.37733	11.4886	3.18992	8.76927		25.5682	9.51671	9.77421	11.1064	12.4995	5.55831	2.548	12.6547	2.5992	8.17471													29.0315	7.99632	9.75886	11.4869	10.1278	6.25529
											22.1612	11.2911	10.9753	9.86686	12.6771	6.60651	2.78945	11.4017	3.2696	8.96133		25.1432	9.71941	9.97811	10.4186	12.3256	6.46301	2.7777	12.7503	2.6947	7.72931													29.3256	7.90122	9.73416	11.5912	9.96708	6.13818
											22.5692	11.3145	10.7598	9.86782	12.7963	6.51039	2.77724	11.2419	3.27676	8.88612		26.4618	9.24807	9.79268	11.2412	11.8947	5.60183	2.36298	12.2113	2.477	8.70846													29.4558	7.94826	9.82184	11.4435	9.92505	6.18208
											22.3237	11.2803	10.9211	9.97652	12.5698	6.50655	2.76181	11.2559	3.23944	9.16491		25.1228	9.81721	10.0138	10.5907	12.3633	6.19581	2.6459	12.4729	2.6894	8.08811													29.3958	7.94858	9.81123	11.5091	9.98893	6.13734
											22.4152	11.1433	11.1076	9.84932	12.9335	6.6075	2.49272	11.3758	3.25394	8.82104		24.6314	9.94491	10.2166	10.3412	12.5065	6.34011	2.7307	12.6425	2.7986	7.84741													29.3485	7.9575	9.76698	11.5083	10.0732	6.14101
											22.3283	11.1787	11.0481	9.80138	12.5301	6.64695	2.80872	11.5235	3.24662	8.8876		25.0111	9.84911	10.0258	10.5079	12.3862	6.21371	2.7362	12.4779	2.7787	8.01331													29.4157	7.8946	9.75697	11.5392	9.96129	6.18585
											22.2774	11.3382	10.8851	9.84533	12.8231	6.62858	2.73583	11.2561	3.29266	8.91767		24.1967	9.98511	10.4143	10.2216	12.6589	6.27931	2.8041	13.0681	2.8141	7.55771													29.7781	7.78809	9.72857	11.726	9.81647	6.04084
											22.1125	11.2547	10.999	9.75711	12.8689	6.82055	2.7156	11.2602	3.39182	8.81966		24.6972	9.962	10.1294	10.5626	12.6044	6.10036	2.62602	12.4778	2.77299	8.06725													29.6217	7.82302	9.66055	11.6557	9.84326	6.18711
											22.3445	11.1454	11.1036	9.91006	12.7428	6.62841	2.55584	11.3358	3.23877	8.99479		24.241	10.0077	10.2228	10.3561	12.5932	6.45741	2.7714	12.4828	2.9342	7.93331													29.5671	7.89156	9.71514	11.6211	9.91905	6.03757
											22.3127	11.3146	10.9099	9.77177	12.7688	6.73824	2.75089	11.2523	3.30684	8.87404		24.7243	9.93361	10.0767	10.456	12.4436	6.27491	2.779	12.5314	2.8067	7.97371													28.7716	8.10147	9.74783	11.3194	10.2095	6.3431
											21.8986	11.3751	11.1154	9.64185	12.7548	6.78026	2.83797	11.3718	3.40007	8.82419		23.9679	9.99111	10.3401	10.1859	12.6688	6.63901	2.8405	12.728	2.9854	7.65321													29.5613	7.93839	9.70687	11.5139	10.0103	6.16912
											22.5087	11.1487	11.2236	9.73658	12.4039	6.55799	2.72946	11.5766	3.18085	8.93364		24.0062	10.064	10.2183	10.2137	12.6973	6.53001	2.9192	12.7379	2.976	7.63731													29.7032	7.87747	9.68153	11.6597	9.94914	5.9888
											22.4548	11.081	10.9658	10.0028	12.6151	6.58806	2.6614	11.4723	3.17541	8.98326		24.0884	10.0515	10.3805	10.1496	12.6915	6.49851	2.8049	12.6618	2.9843	7.68891													29.9288	7.77375	9.65063	11.68	9.85364	6.04947
											22.092	11.2739	11.0334	9.74301	12.7634	6.79034	2.76394	11.4556	3.29749	8.78683		24.4409	9.92281	10.1781	10.2855	12.5124	6.44241	2.8771	12.5974	2.9622	7.78111													29.4679	7.9284	9.74982	11.5778	9.98702	6.05627
											22.2659	11.2967	11.0231	9.77141	13.0583	6.68161	2.55431	11.2121	3.34043	8.79619		22.9524	10.2485	10.3756	9.77971	12.8224	7.09641	3.2848	13.0697	3.2247	7.14571													29.5912	7.92393	9.66895	11.5576	9.98047	6.11591
											21.8307	11.3938	11.3636	9.58803	12.9665	6.57435	2.66564	11.0756	3.59611	8.94566		23.8729	10.1873	10.3098	10.0395	12.703	6.58141	2.9783	12.635	3.0736	7.61911													29.5761	7.82818	9.74887	11.5788	9.91599	6.15892
											22.1942	11.3187	11.0192	9.82908	12.5566	6.56057	2.83699	11.3479	3.29125	9.04563		23.8005	10.2129	10.303	9.92701	12.8274	6.70331	2.9979	12.6902	3.1116	7.42611													29.3285	7.86993	9.73458	11.5719	10.0289	6.1523
											22.5263	11.298	10.9407	9.75783	12.8841	6.54248	2.67574	11.3496	3.26471	8.76054		23.8014	10.2189	10.5592	9.75631	12.8976	6.75931	2.8458	12.75	3.0898	7.32161													29.5549	7.82912	9.70785	11.5491	9.97357	6.20802
											22.265	11.1343	11.0588	9.86957	12.5615	6.73024	2.72555	11.3717	3.28303	9.00022		23.2083	10.2919	10.6342	9.58081	12.7917	7.12181	3.0781	12.9254	3.1824	7.18531													29.1202	7.95855	9.85765	11.4319	9.99496	6.24735
											22.6592	11.1191	10.9692	9.91022	12.5899	6.51765	2.67789	11.3872	3.20346	8.96624		23.3979	10.2466	10.4466	9.53991	12.4228	7.30501	3.3273	12.9432	3.1671	7.20351													29.0754	7.99414	9.64965	11.4344	10.0393	6.37373
											22.5179	11.1756	10.9476	9.8574	12.7811	6.58822	2.66355	11.3202	3.28005	8.86835		22.8276	10.3272	10.4276	9.36921	12.171	7.52321	3.7787	13.0885	3.3701	7.11681													29.128	7.84481	9.73806	11.5568	10.0223	6.25909
											21.6404	11.5429	11.1646	9.46865	13.3934	6.90838	2.62417	11.3193	3.47176	8.46637		22.9669	10.125	10.5564	9.23191	12.0983	7.96171	3.6357	13.2044	3.2984	6.92121													29.4055	7.87269	9.62596	11.6201	9.93319	6.14481
											22.5472	11.3691	10.8569	9.86838	12.718	6.41542	2.74985	11.1584	3.27346	9.04334		24.2819	9.98793	10.1983	10.0439	12.0678	6.76772	3.20511	12.7869	2.95071	7.70962													29.2014	7.88589	9.77627	11.4256	10.0163	6.29116
											22.9855	11.0777	10.8328	10.0056	12.439	6.46208	2.67954	11.308	3.12266	9.08712		24.0644	10.2351	10.179	9.90751	12.9341	6.68511	2.9541	12.545	3.1206	7.37501													29.4476	7.93297	9.68708	11.5304	9.97572	6.14325
											22.2669	11.2416	11.1246	9.81488	12.8754	6.53603	2.60065	11.4647	3.24717	8.828		23.1761	10.2795	10.2622	9.78451	13.0183	6.97841	3.2271	12.6919	3.3816	7.20031													29.7426	7.82237	9.70443	11.5679	9.87924	6.11661
											22.4757	11.3207	10.7983	9.95184	12.4242	6.59764	2.84068	11.1861	3.19826	9.20664		23.6234	10.2367	10.2183	10.0566	13.0771	6.59951	2.9567	12.627	3.1726	7.43201													29.4808	7.85083	9.72845	11.7085	9.88976	6.08201
											22.5547	11.1751	10.92	9.98187	12.5618	6.44464	2.72985	11.3821	3.19198	9.05801		23.9383	10.1115	10.2049	10.1488	13.0214	6.54041	2.8405	12.6278	3.084	7.48231													29.9601	7.80647	9.71653	11.666	9.89584	5.9132
											22.6313	11.1822	10.8475	10.1193	12.5369	6.41385	2.65076	11.2322	3.13581	9.25021		24.1085	10.1069	10.1646	10.1519	12.7718	6.55231	2.9137	12.6003	3.0283	7.60161													29.1849	7.94735	9.61324	11.6188	10.064	6.20265
											22.0351	11.2203	10.9839	9.93456	12.6661	6.72629	2.75738	11.3617	3.29117	9.0235		24.144	10.0133	10.2705	10.1288	12.7326	6.61201	2.8497	12.6552	3.017	7.57681													28.9868	7.99199	9.80511	11.3713	10.0932	6.36548
											22.5708	11.113	11.0552	9.80386	12.4535	6.60157	2.77133	11.358	3.28969	8.98302		23.5488	10.0802	10.3251	10.0898	12.8417	6.67851	3.0105	12.8321	3.1377	7.45551													29.5694	7.87538	9.6043	11.578	9.92072	6.22579
											22.6045	11.1085	10.8526	10.0514	12.7022	6.56069	2.60821	11.2923	3.18487	9.03473		23.8841	10.0608	10.2164	10.2529	12.6747	6.43421	3.0037	12.7093	3.0642	7.69961													29.8741	7.76822	9.54414	11.7167	9.88786	6.05791
											22.1865	11.2397	11.1714	9.74094	12.5784	6.57326	2.79936	11.5593	3.27465	8.87663		23.7116	10.0121	10.1688	10.2833	12.872	6.58571	2.9572	12.8863	3.0283	7.49461													29.4928	7.87343	9.63925	11.7724	9.96667	5.9944
											22.4015	11.1282	11.2295	9.89206	13.3836	6.55822	2.14273	11.287	3.24154	8.73558		24.2889	9.85191	10.1476	10.4771	12.706	6.39161	2.756	12.6656	2.9241	7.79111													29.2631	7.9653	9.74482	11.4288	10.0374	6.27898
											21.9658	11.3036	11.166	9.55867	12.7517	6.84255	2.84304	11.4724	3.41418	8.68198		23.2102	10.0677	10.3239	10.031	12.7245	6.97811	3.1548	12.988	3.1512	7.37051													29.4569	7.86603	9.80806	11.5193	10.0307	6.15211
											22.0478	11.3032	11.0753	9.75432	12.8466	6.78245	2.68032	11.3158	3.33156	8.86262		24.0514	9.99451	10.2952	10.3834	12.6962	6.37101	2.7648	12.7603	2.8831	7.80001													29.4371	7.87064	9.69494	11.5059	9.95736	6.19325
											22.5158	11.1526	11.0453	9.96603	12.7247	6.51918	2.53238	11.2708	3.20524	9.06786		24.0941	9.96201	10.2618	10.2188	12.6604	6.54271	2.8897	12.6709	3.0344	7.66511													29.5848	7.80052	9.69845	11.6805	9.87806	6.15971
											22.7942	11.1969	10.8634	9.95171	12.9611	6.42069	2.49916	11.2213	3.20207	8.88952		24.4115	9.91858	10.1488	10.4236	12.6287	6.36099	2.76769	12.6051	2.89455	7.84044													29.2258	7.90952	9.74396	11.4705	10.0419	6.28359
											22.614	11.1912	10.9856	9.85239	12.5286	6.51488	2.73751	11.2673	3.26514	9.04333		23.8944	10.0401	10.1847	10.324	12.8448	6.49831	2.8524	12.6608	3.0167	7.68371													29.5903	7.85803	9.71315	11.691	9.97367	6.006
											22.4372	11.1526	11.0653	9.91495	12.6234	6.50614	2.6601	11.3816	3.23722	9.02157		24.8656	9.75851	10.2191	10.5959	12.418	6.30811	2.5099	12.4206	2.7389	8.16531													29.2745	7.9785	9.70485	11.5789	10.0628	6.16384
											22.1338	11.1584	10.9988	9.78125	12.6341	6.82415	2.84477	11.4851	3.3396	8.79999		22.8935	10.7934	10.414	9.91201	13.3583	6.88161	2.7105	12.8906	2.7547	7.39131													29.4903	7.92434	9.6742	11.4725	10.0334	6.21
											22.45	11.2951	10.9203	9.92514	12.7246	6.51975	2.65981	11.2515	3.20914	9.04467		23.4769	10.0054	10.4549	10.5774	12.5608	6.64284	2.62463	12.8151	2.72225	8.11964													29.8741	7.83092	9.67525	11.6543	9.87226	6.009
											22.0903	11.2727	11.0497	9.79341	12.7909	6.66356	2.74785	11.4031	3.33045	8.8581		23.8736	9.96701	10.5417	10.4343	12.5144	6.58491	2.554	12.6301	2.7835	8.11641													29.7984	7.82074	9.62264	11.7313	9.92006	5.98684
											22.4551	11.207	10.9049	9.97606	12.7333	6.48556	2.67838	11.2834	3.25216	9.02412		24.2762	9.94231	10.1826	10.3587	12.4628	6.54391	2.846	12.7004	2.8474	7.83961													29.986	7.79527	9.61553	11.7048	9.88514	5.9339
											22.4667	11.2435	10.9073	9.86627	12.6354	6.53004	2.78824	11.2994	3.28883	8.97439		24.6523	9.84401	10.2005	10.3842	12.4936	6.48211	2.6793	12.5993	2.8047	7.85991													29.3043	7.97816	9.79454	11.4792	10.0713	6.12348
											22.0279	11.2831	11.1916	9.70945	13.286	6.685	2.4573	11.3774	3.3658	8.61644		24.3414	10.0299	10.1703	10.2584	12.4879	6.60041	2.8415	12.622	2.8446	7.80351													29.6324	7.84068	9.73207	11.5078	9.89429	6.23682
											22.1193	11.2069	11.0347	9.79794	12.7101	6.65769	2.82059	11.4936	3.34242	8.81673		24.5569	10.0858	10.1598	10.1022	12.3052	6.63801	2.945	12.715	2.7771	7.71491													29.2639	7.93078	9.74908	11.4999	10.0133	6.2889
											22.1863	11.2553	10.9057	9.93411	12.5949	6.61899	2.83244	11.3705	3.26986	9.03188		24.5397	9.9534	10.0405	10.3025	12.3882	6.65964	2.88655	12.6287	2.80981	7.79091													29.4174	7.92751	9.67796	11.6369	10.0205	6.14875
											22.703	10.9709	11.0306	9.87075	12.29	6.64557	2.79348	11.6715	3.133	8.89121		25.0224	9.87921	9.99491	10.54	12.3844	6.26631	2.6889	12.5015	2.6882	8.03411													29.2408	7.90823	9.73535	11.5504	9.98337	6.25542
											22.4761	11.1922	11.1479	9.86146	12.4445	6.53175	2.66813	11.3897	3.17293	9.1154		24.2045	10.044	10.3969	10.2345	12.5782	6.62771	2.6413	12.5704	2.8217	7.88071													29.6585	7.89498	9.66497	11.6138	9.9463	6.09248
											22.7202	11.1781	10.9032	10.0484	12.9297	6.36027	2.45452	11.2068	3.17852	9.02025		25.3783	9.74651	10.0984	10.6717	12.4475	6.07371	2.4069	12.3072	2.6529	8.21681													29.4849	7.84103	9.75695	11.5362	9.93307	6.15181
											22.435	11.1794	11.034	9.83199	13.0302	6.56479	2.52869	11.4586	3.24201	8.69537		25.0906	9.85401	9.91131	10.6093	12.4283	6.17071	2.7076	12.3647	2.768	8.09541													29.2257	7.91983	9.76135	11.5403	9.95687	6.27912
											22.2317	11.2155	10.9907	9.94852	12.8176	6.53332	2.66203	11.3229	3.29735	8.98049		25.0762	9.78841	9.94121	10.6931	12.4622	6.08481	2.6599	12.4228	2.756	8.11531													29.4951	7.84581	9.77696	11.5276	9.93117	6.13628
											22.2743	11.1801	11.0691	9.82961	12.7309	6.61669	2.70024	11.4672	3.27654	8.8552		24.3625	9.95951	10.0846	10.3648	12.5893	6.34061	2.9246	12.7432	2.9102	7.72061													28.6913	8.07948	9.75588	11.3298	10.1961	6.46719
											22.2683	11.2407	11.0058	9.91984	12.8133	6.47986	2.67301	11.3804	3.27231	8.94642		24.8518	9.77761	9.95201	10.6298	12.5681	6.20621	2.7163	12.4661	2.8545	7.97751													29.3777	7.987	9.74227	11.4722	10.055	6.18902
											22.5295	11.0457	11.0245	10.1056	12.3773	6.44948	2.66864	11.4924	3.10082	9.20599		23.5955	10.0556	10.2325	10.1186	12.5331	6.83811	3.1377	12.851	3.0672	7.57061													29.4162	7.91517	9.72979	11.4704	9.99492	6.29987
											22.2589	11.2529	10.8271	10.0381	12.4921	6.68352	2.79078	11.2692	3.18967	9.19773		24.2774	10.0152	10.0529	10.3702	12.6324	6.36851	2.9301	12.706	2.9122	7.73501													28.9249	7.99262	9.86687	11.3521	10.0706	6.32689
											22.6814	11.1745	10.8204	10.0005	12.5601	6.4695	2.73604	11.2548	3.21132	9.09132		24.2145	10.0951	10.0893	10.1893	12.7737	6.51231	2.9235	12.5227	3.0461	7.63341													29.5416	7.87137	9.73173	11.6166	9.96784	6.06131
											22.4313	11.1258	10.9333	10.0456	12.4891	6.52408	2.73579	11.4514	3.15846	9.1052		23.4306	10.2733	10.0017	9.76701	12.617	7.24291	3.4494	12.7771	3.2335	7.20741													29.6285	7.78986	9.71688	11.6229	9.946	6.16348
											22.5069	11.066	10.9878	10.1294	12.2505	6.49977	2.7214	11.282	3.16592	9.39034		23.9038	10.1818	10.1287	9.85211	12.7473	6.92371	3.1409	12.7098	3.1331	7.27871													28.8109	8.0757	9.75958	11.4246	10.1415	6.2886
											22.5915	11.1329	10.8984	9.99818	12.7781	6.47362	2.61535	11.3469	3.21361	8.95154		24.2886	10.0197	10.1575	10.1435	12.3761	6.74922	2.98211	12.6743	2.90191	7.70692													29.8766	7.83813	9.70765	11.5934	9.87756	6.06531
											22.2571	11.2936	10.8842	9.83334	12.7182	6.68348	2.80587	11.2751	3.32305	8.92609		24.9574	9.75731	10.0582	10.5295	12.5238	6.15841	2.7138	12.7609	2.7457	7.79491													29.5898	7.88525	9.65923	11.6101	9.97815	6.15668
											22.2997	11.247	11.0604	9.80376	13.0737	6.6362	2.50765	11.3131	3.29467	8.76387		25.0406	9.74371	10.016	10.559	12.5497	6.16991	2.673	12.6874	2.7403	7.82031													30.0759	7.80904	9.68744	11.664	9.78365	5.96933
											22.6121	11.1965	10.93	9.96197	12.8343	6.46259	2.55478	11.274	3.202	8.97172		24.8384	9.77651	10.0321	10.5268	12.5813	6.30241	2.6918	12.7158	2.7523	7.78251													29.3897	7.92157	9.78823	11.5446	9.94234	6.15851
											22.8479	11.1713	10.7264	10.1287	12.4664	6.4531	2.67564	11.194	3.08893	9.24756		24.8594	9.75181	10.0065	10.5307	12.5294	6.21721	2.7839	12.7336	2.8091	7.77831													29.4649	7.9045	9.67426	11.5177	9.97709	6.20785
											22.4775	11.2748	10.7908	9.88351	12.6231	6.70258	2.78682	11.165	3.27346	9.02244		24.8603	9.65901	10.1711	10.5508	12.5929	6.12931	2.6573	12.845	2.7873	7.74691													29.1298	7.99252	9.73606	11.4624	10.1042	6.27159
											22.2189	11.2812	11.0721	9.61582	13.1717	6.82125	2.56603	11.2975	3.39829	8.55728		24.1979	9.93011	10.3959	10.2001	12.5716	6.60971	2.7493	13.0036	2.7662	7.57551													29.0954	7.9531	9.75669	11.4404	10.1006	6.32087
											22.6077	11.1966	10.739	9.77299	12.1898	7.12999	2.92609	11.4055	3.08994	8.94233		24.1463	9.84411	10.2691	10.4435	12.6276	6.43031	2.7632	12.8941	2.8425	7.73921													29.4224	7.91056	9.71122	11.5055	9.98651	6.16152
											22.4087	11.1274	11.0916	9.79205	12.7118	6.67271	2.65585	11.3871	3.30027	8.85254		23.8632	9.93161	10.3105	10.3722	12.6528	6.43851	2.8742	13.0949	2.8426	7.61941													29.4493	7.95274	9.66765	11.5956	10.0196	6.12249
											22.3882	11.1374	11.0201	9.97481	12.7286	6.50445	2.62511	11.3554	3.25357	9.01238		24.6417	9.82941	10.1577	10.3514	12.6782	6.32531	2.7536	12.656	2.9288	7.67781													29.167	8.02262	9.71013	11.4472	10.103	6.26789
											22.2325	10.9741	11.1819	9.98679	12.6568	6.68609	2.55647	11.4089	3.28428	9.03222		24.0616	10.0411	10.2693	10.1464	12.8369	6.50521	2.8619	12.7671	3.0108	7.49961													29.652	7.87338	9.75557	11.5456	9.92993	6.06371
											22.5798	11.0355	11.0094	9.96954	12.7663	6.7142	2.47279	11.2092	3.238	9.00527		24.3434	9.97301	10.1168	10.328	12.7449	6.27991	2.8846	12.7796	2.9391	7.61061													29.5683	7.87771	9.74048	11.6026	9.93514	6.12317
											22.2387	11.205	10.9482	9.83691	12.8805	6.74272	2.68146	11.3852	3.3004	8.78095		24.213	9.97151	10.1449	10.3116	12.8278	6.36561	2.8545	12.8196	2.9453	7.54611													29.5141	7.88353	9.74367	11.6345	9.92233	6.14331
											22.219	11.2071	10.9857	9.83999	12.7179	6.71768	2.74352	11.3814	3.30095	8.88682		24.6143	9.79391	10.2528	10.4355	12.8301	6.25371	2.5657	12.6257	2.8973	7.73091													28.6087	8.15098	9.77702	11.1809	10.2504	6.53045
											22.1279	11.2132	10.9981	9.87277	12.5677	6.65225	2.84848	11.4937	3.27759	8.94833		24.8547	9.89611	10.1488	10.362	12.6579	6.37291	2.5984	12.517	2.7952	7.79691													29.4075	7.93138	9.67987	11.554	9.98471	6.19149
											22.2188	11.1838	11.0812	9.80796	12.6374	6.69609	2.74288	11.4314	3.29448	8.90597		24.3447	9.99851	10.0066	10.3328	12.7907	6.36651	2.9103	12.5983	3.0106	7.64091													29.5661	7.89299	9.69957	11.532	9.9692	6.18612
											21.8557	11.28	11.1219	9.59474	13.0794	6.91475	2.71837	11.5229	3.41725	8.49495		24.1943	9.89091	10.2947	10.2227	12.8508	6.57101	2.729	12.7477	2.9825	7.51631													29.2251	8.03256	9.69684	11.518	10.1636	6.14888
											22.7071	11.1988	10.8882	9.93964	12.7292	6.46202	2.62307	11.1853	3.23962	9.02716		24.9138	9.79551	10.1937	10.3849	12.6246	6.27491	2.6169	12.5804	2.8381	7.77711													29.3029	7.99376	9.65719	11.6073	10.0871	6.09527
											26.5297	10.3527	10.0101	9.85951	12.3373	6.0129	2.5142	11.1167	2.95309	8.31378		24.2547	9.74681	10.2259	10.8749	12.6055	6.14581	2.5228	12.9036	2.6133	8.10661													30.1461	7.78225	9.59607	11.6728	9.8286	6.02233
											22.544	11.1551	11.0776	9.80807	12.6463	6.65628	2.61298	11.4017	3.19723	8.90077		21.5506	10.1611	11.2748	9.44151	12.7952	8.16201	2.9492	13.3319	3.2377	7.09591													29.5915	7.92107	9.70763	11.5849	9.98844	6.06391
											22.8375	11.1099	10.9352	9.81568	12.5528	6.65969	2.6691	11.4639	3.12662	8.82962		22.2588	10.326	10.8855	9.48391	12.493	7.71821	3.2326	13.0196	3.249	7.33331													29.2807	8.01843	9.76816	11.4552	10.0421	6.22299
											22.4411	11.2664	11.1062	9.78062	12.4672	6.54714	2.75233	11.4347	3.18816	9.0162		25.1337	9.75821	10.0621	10.7105	12.4172	6.09751	2.524	12.4704	2.6494	8.17691													29.3577	7.89598	9.77761	11.4657	10.0094	6.22777
											22.4352	11.155	10.8912	9.99551	12.643	6.59473	2.69904	11.3688	3.204	9.01352		28.5946	8.72391	9.50941	11.8915	10.6338	5.71891	1.7634	10.9368	2.0047	10.2229													29.1874	7.99462	9.73296	11.4637	10.0664	6.26969
											22.5417	11.1733	10.9195	10.0092	12.5265	6.53859	2.68091	11.2311	3.20255	9.17663		23.7405	12.0213	10.2103	9.00991	14.1541	6.56001	2.5418	12.0606	2.6831	7.01831													29.4346	7.94551	9.66776	11.5253	10.0602	6.20055
											22.453	11.1412	11.0362	9.97352	12.5875	6.44941	2.67488	11.4883	3.17197	9.0241		22.9053	12.4352	10.3001	8.64751	14.5877	6.85281	2.6619	12.1577	2.8093	6.64241													29.0494	7.9749	9.71445	11.4384	10.0283	6.35868
											22.7271	10.9885	10.8978	10.0731	12.3982	6.48923	2.72744	11.3319	3.21471	9.15197		21.4802	13.3341	10.4259	7.85211	15.6487	7.03541	2.9727	12.5045	3.0907	5.65561													29.5515	7.88723	9.68325	11.5912	9.94347	6.15731
											22.1658	11.2742	10.9828	9.8307	12.9589	6.69833	2.63804	11.3181	3.3126	8.82046		22.0743	12.7361	10.3793	8.39851	14.9876	6.92161	2.8623	12.454	2.9507	6.23551													29.7586	7.8876	9.62146	11.6335	9.95899	6.08064
											22.88	11.1228	10.8005	10.0327	12.4484	6.42068	2.73065	11.2136	3.18655	9.16414		23.8826	11.259	10.1174	9.64991	13.1542	6.70761	2.731	12.0241	2.7252	7.74891													28.868	7.98573	9.77425	11.3635	10.1218	6.48186
											22.1275	11.2879	11.0122	9.78846	13.0399	6.74107	2.60109	11.3909	3.28777	8.72321		23.6875	11.3485	10.2336	9.4317	13.3394	6.84734	2.72344	12.1368	2.76727	7.48452													29.3108	7.86803	9.78886	11.541	10.0134	6.21232
											22.4315	11.1108	10.9439	10.0434	12.7111	6.55305	2.60975	11.2642	3.24958	9.08263		21.5316	10.0723	10.1819	9.64921	12.2464	8.90981	3.7888	12.9411	3.4963	7.18251													29.566	7.93972	9.74106	11.5109	10.0254	6.12958
											22.3626	11.1956	11.2143	9.81017	12.7907	6.59042	2.50588	11.3095	3.25574	8.96506		17.0419	11.5314	10.2062	7.37255	11.2914	10.7846	7.09659	14.6599	4.74987	5.26568													29.1034	8.03432	9.73597	11.4194	10.1244	6.23345
											22.1275	11.3556	11.0495	9.74511	12.8526	6.64539	2.71437	11.2394	3.36774	8.90261		16.8637	11.5199	10.2574	7.30901	11.2963	10.8554	7.166	14.7424	4.81175	5.1782													29.4442	7.89602	9.66865	11.4261	9.95548	6.3639
											22.3733	11.2065	11.1145	9.82872	13.0857	6.59425	2.42708	11.3175	3.26493	8.78749		16.7835	11.5837	10.1228	7.35636	11.2226	10.7492	7.35145	14.8872	4.78864	5.15456													29.5363	7.91663	9.78086	11.4912	9.96847	6.19712
											22.4031	11.2329	11.0248	9.8503	12.7347	6.61822	2.63035	11.2772	3.25552	8.97297		16.8164	11.5853	10.1111	7.36944	11.1966	10.7224	7.35892	14.8644	4.78827	5.18719													29.2713	7.97676	9.68234	11.4668	10.0194	6.25048
											22.2571	11.2356	11.0048	9.88824	12.7267	6.47481	2.75958	11.47	3.27255	8.91072		16.9202	11.5334	10.1818	7.4199	11.2678	10.7599	7.15757	14.7713	4.73021	5.25789													29.5948	7.9175	9.69726	11.6141	9.92688	6.07984
											22.4962	11.2472	11.0429	9.76615	13.0303	6.64758	2.48012	11.297	3.24513	8.74741		16.702	11.5901	10.1728	7.33966	11.2557	10.7587	7.33445	14.8301	4.83822	5.17818													29.4508	7.87992	9.61492	11.6656	9.93737	6.20284
											22.5497	10.929	11.0709	10.3042	12.7504	6.26036	2.38019	11.4018	3.12544	9.22792		17.1353	11.5549	10.009	7.48239	11.2088	10.6226	7.24794	14.8349	4.66205	5.24218													29.4672	7.97047	9.65918	11.4366	10.0397	6.30177
											22.3323	11.3732	10.9764	9.70662	12.8416	6.68552	2.7011	11.2243	3.31116	8.84772		17.1494	11.5667	9.96489	7.46311	11.1813	10.596	7.32519	14.8545	4.6878	5.21104													29.3655	7.9545	9.68497	11.4198	10.0582	6.30203
											22.2539	11.3487	10.8675	9.83073	12.6504	6.56908	2.89073	11.3335	3.30855	8.94695		16.7956	11.6008	10.0746	7.3566	11.1251	10.7503	7.43291	14.8752	4.79481	5.19406													29.5393	7.90708	9.61847	11.5676	9.97821	6.15898
											22.5379	11.2523	10.8482	9.9898	12.8308	6.50682	2.59795	11.2151	3.20354	9.0175																								29.4908	7.93836	9.64111	11.5555	10.0248	6.1843
											22.5129	11.0271	10.8815	10.1542	12.4329	6.63877	2.658	11.3725	3.1158	9.20632																								29.5069	7.84168	9.68755	11.565	9.9454	6.17724
											22.3421	11.1816	11.0978	9.7114	12.8713	6.76403	2.61149	11.3895	3.31027	8.72049																								29.429	7.88095	9.7469	11.486	9.93892	6.28024
											22.3345	11.3031	10.8109	9.98214	12.7658	6.56251	2.72362	11.2524	3.23427	9.03075																								29.3605	7.99067	9.74849	11.4849	10.0117	6.15575
											22.7985	11.0599	10.7848	10.2467	12.4331	6.31356	2.66586	11.3335	3.0781	9.286																								29.6307	7.82361	9.63579	11.5721	9.94014	6.17816
											22.0702	11.3138	11.0002	9.74886	12.8132	6.75919	2.773	11.2718	3.38684	8.86288																								29.4324	7.98527	9.76643	11.5314	10.0226	6.09229
											22.3993	11.1504	10.9739	9.98152	12.8063	6.72114	2.50546	11.2591	3.19117	9.01172																								29.4049	7.92373	9.75005	11.4753	9.97317	6.25312
											22.1253	11.2513	11.0723	9.7748	12.7669	6.63344	2.76422	11.4218	3.34711	8.84272																								29.4447	7.92359	9.69887	11.5137	9.9936	6.20432
											22.4353	11.1772	11.0831	9.85574	12.9896	6.60996	2.45493	11.2565	3.27429	8.86331																								29.1791	8.00528	9.6575	11.4617	10.1139	6.28715
											22.4414	11.2751	10.8239	9.95242	12.6228	6.558	2.77473	11.239	3.24137	9.0712																								29.3544	7.96162	9.70236	11.5085	10.0625	6.21468
											22.1903	11.231	11.0796	9.90928	12.7469	6.57358	2.6401	11.2721	3.3018	9.05533																								29.223	7.8969	9.71815	11.5779	10.0099	6.30138
											22.5401	11.204	10.946	9.89568	12.5894	6.60827	2.6875	11.3652	3.17055	8.99329																								29.4022	7.92633	9.67235	11.5167	9.97047	6.29822
											22.2422	11.0368	11.05	9.86028	12.4764	6.80311	2.81022	11.5222	3.29461	8.90418																								29.9674	7.79216	9.62077	11.6455	9.8961	6.07697
											22.4733	11.2286	11.0816	9.94324	13.1171	6.4299	2.35036	11.2076	3.23181	8.93646																								29.2645	7.95251	9.68116	11.5034	10.0177	6.27416
											22.3386	11.1347	10.9998	9.87343	12.6777	6.63005	2.73621	11.2853	3.36471	8.9595																								28.6575	8.1097	9.69978	11.3802	10.1353	6.47632
											22.6152	11.379	10.8849	9.76151	12.8745	6.61715	2.61039	11.2005	3.20056	8.85624																								29.2678	7.9661	9.66957	11.5198	10.0985	6.24752
											22.2229	11.2256	11.0227	9.80249	12.568	6.66416	2.83379	11.4626	3.28519	8.91258																								29.0313	8.01573	9.72346	11.3471	10.0663	6.4217
											22.3886	11.2249	10.9344	9.92188	12.8129	6.69489	2.58304	11.2307	3.22885	8.97979																								29.3819	7.89072	9.6883	11.4536	9.93624	6.35699
											22.3215	11.2713	10.9857	9.74114	12.8043	6.73017	2.7091	11.2602	3.33869	8.83797																								29.63	7.87484	9.63594	11.5819	9.92256	6.15644
											22.2879	11.2495	10.9154	9.95393	12.6276	6.60825	2.74403	11.3376	3.22159	9.05427																								29.1827	8.04203	9.77636	11.4286	10.0948	6.24139
											22.5798	11.0644	10.9705	9.95833	12.8066	6.61951	2.53546	11.3318	3.22608	8.90759																								29.3349	8.00662	9.74545	11.3744	10.0377	6.24899
											22.1742	11.2532	11.0699	9.78112	12.7779	6.69168	2.70007	11.3749	3.3099	8.86717																								29.5583	7.8689	9.62846	11.5979	9.97959	6.20695
											22.4825	11.1084	11.0123	9.92324	12.6177	6.6379	2.64153	11.279	3.26235	9.03507																								29.2813	7.94261	9.66703	11.4659	10.046	6.2854
											22.1971	11.2066	11.1644	9.79127	12.5815	6.55952	2.77186	11.4809	3.3012	8.94566																								29.1511	7.9617	9.78439	11.4204	10.0586	6.25687
											22.3919	11.2374	11.0694	9.85889	12.7189	6.54906	2.62296	11.294	3.25171	9.00565																								29.5437	7.87167	9.74664	11.4978	9.95113	6.20197
											22.041	11.1944	11.0765	9.72561	12.8486	6.72918	2.79156	11.5514	3.38101	8.66076																								29.3722	7.94718	9.7271	11.3794	9.98323	6.39909
											21.7678	11.2992	11.2752	9.68234	13.3391	6.83267	2.42282	11.4128	3.37413	8.59391																								29.3815	7.91281	9.75395	11.3438	9.98186	6.37633
											22.2187	11.217	11.1302	9.88132	13.0522	6.51056	2.4893	11.4774	3.23329	8.78998																								29.54	7.94922	9.60305	11.4963	9.97982	6.26257
											22.4394	11.1461	10.9407	9.96544	12.6336	6.44905	2.75981	11.4293	3.2589	8.97774																								29.4695	7.88717	9.63659	11.5484	9.99214	6.24088
											22.1713	11.1793	11.0138	9.88577	12.6323	6.75696	2.73039	11.3979	3.26502	8.96722																								29.3982	7.91588	9.66933	11.5433	10.0117	6.21745
											22.0336	11.3958	11.0734	9.57736	12.6494	6.75238	2.93371	11.537	3.32863	8.71871																								29.4946	7.93096	9.67867	11.4786	9.96871	6.16705
											22.461	11.1275	10.9063	9.94926	12.5074	6.64002	2.7765	11.3742	3.2323	9.02557																								29.587	7.92423	9.67319	11.4719	9.94471	6.16037
											22.4007	11.2399	10.8655	9.91924	12.5917	6.64009	2.77885	11.235	3.27011	9.05895																								29.9605	7.83458	9.64321	11.5776	9.89172	6.07508
											22.2975	11.1425	11.3468	9.72668	13.5289	6.60286	2.141	11.5104	3.25195	8.45132																								29.1125	8.08123	9.77157	11.3134	10.1064	6.29953
											22.1185	11.2523	11.0234	9.85127	12.8349	6.61854	2.71331	11.4306	3.3008	8.85638																								29.1631	8.03228	9.69041	11.4038	10.0447	6.38897
											22.7747	11.0529	10.9346	10.0485	12.7611	6.42398	2.51107	11.3254	3.16938	8.99847																								29.1735	7.94866	9.65221	11.4524	10.0263	6.38868
											22.4327	11.1957	10.9317	9.94291	12.622	6.60384	2.69816	11.2601	3.24681	9.06606																								29.2459	8.01031	9.72506	11.3431	10.1079	6.4061
											22.2217	11.2371	10.9748	9.73437	12.7862	6.76243	2.78682	11.4061	3.34577	8.74475																								29.379	7.97281	9.64559	11.3873	10.0348	6.30903
											22.5071	11.1903	10.9347	9.87549	13.0159	6.55113	2.55746	11.2534	3.31144	8.80319																								29.3491	7.88631	9.69087	11.5544	9.92361	6.26687
											22.2039	11.3957	10.9013	9.82701	12.8527	6.51542	2.78776	11.2422	3.34611	8.92775																								29.2745	7.96031	9.61771	11.419	10.0815	6.36465
											22.2692	11.2555	10.8462	9.87666	12.5682	6.72713	2.86678	11.2504	3.32099	9.01891																								29.3517	7.96027	9.69654	11.5101	10.007	6.27121
											22.2242	11.1133	11.2648	9.75583	12.5079	6.63991	2.73661	11.6628	3.23441	8.8602																								29.3818	7.92934	9.64325	11.468	10.055	6.29617
											22.1147	11.3069	11.1601	9.65534	12.7505	6.63818	2.77957	11.5661	3.29845	8.73024																								29.1766	8.09742	9.69183	11.3243	10.15	6.36964
											22.0424	11.3141	11.003	9.70188	12.703	6.7711	2.8794	11.4441	3.35325	8.78787																								29.0317	8.07565	9.73379	11.3378	10.1111	6.41762
											22.4642	11.1617	11.0662	9.78122	12.9008	6.72188	2.5283	11.2784	3.29155	8.80572																								29.5997	7.91106	9.62566	11.5289	10.0283	6.15994
											22.2789	11.0949	11.1728	9.91711	13.0981	6.52722	2.41025	11.4137	3.29169	8.7954																								29.1481	8.01872	9.7136	11.3896	10.0892	6.31624
											21.8851	11.324	11.0701	9.57417	13.0016	6.78423	2.85836	11.5574	3.45341	8.49159																								29.7432	7.87163	9.56697	11.5872	9.91285	6.19819
											22.0801	11.213	11.028	9.92374	12.6822	6.56474	2.77836	11.5092	3.27228	8.94836																								28.8918	8.08725	9.77966	11.2284	10.0969	6.57294
											22.2796	11.2535	10.9958	9.86551	12.538	6.62011	2.79326	11.4201	3.22335	9.01073																								29.8021	7.91149	9.59808	11.5354	9.92955	6.15726
											22.3661	11.2625	10.9852	9.92113	12.4619	6.45861	2.81901	11.376	3.22318	9.12647																								29.3203	7.95768	9.69195	11.4069	10.0379	6.32656
											22.6993	11.0838	10.9898	10.0222	12.8972	6.43373	2.43106	11.3642	3.15039	8.92833																								29.4855	7.94048	9.6169	11.4421	10.0713	6.28306
											22.4233	11.1552	10.9501	9.82809	12.5461	6.74931	2.78447	11.3746	3.26783	8.92099																								29.4686	7.9199	9.63531	11.5959	9.96628	6.18128
											22.5981	11.246	10.9521	9.85414	13.0469	6.56484	2.4659	11.1493	3.26774	8.85478																								29.5855	7.95029	9.63704	11.4716	9.99255	6.17279
											21.9632	11.346	11.0337	9.73094	12.7003	6.71249	2.87406	11.4703	3.33322	8.83585																								29.345	7.97948	9.67604	11.2997	10.0178	6.49565
											22.7883	11.1163	11.0222	9.84899	12.3403	6.54565	2.7331	11.4126	3.15003	9.04242																								29.4455	7.90094	9.66055	11.4708	9.97994	6.27271
											22.5904	11.2308	10.9295	9.89662	12.5429	6.49308	2.74532	11.2739	3.22913	9.0684																								29.5721	7.91791	9.63627	11.4106	9.99527	6.38246
											22.6247	11.1568	11.0262	9.7966	12.5979	6.54677	2.71384	11.4252	3.23505	8.877																								29.3743	7.99019	9.64788	11.3613	10.0635	6.40214
											21.9225	11.518	11.6478	9.57634	13.6771	6.38267	2.02553	11.0866	3.38592	8.77761																								29.1545	8.04871	9.68773	11.3194	10.1123	6.37166
											22.2244	11.2422	11.0498	9.75177	12.8169	6.7629	2.67514	11.3437	3.3156	8.81763																								29.4628	7.9173	9.6742	11.4063	10.0213	6.34261
											22.2846	11.2611	10.9211	9.81636	12.5889	6.67064	2.85944	11.3819	3.29322	8.92273																								29.477	7.95761	9.6994	11.3779	10.0201	6.23592
											22.1839	11.2384	10.9593	9.93298	13.0282	6.54856	2.60797	11.5381	3.2134	8.74916																								29.4411	7.95695	9.66284	11.4046	10.0306	6.33891
											22.3802	11.2112	11.0045	9.79864	12.8116	6.61057	2.68996	11.3051	3.33968	8.84863																								29.3146	7.95369	9.57365	11.4308	10.0572	6.36565
											22.4248	11.0485	11.0929	9.94664	12.7372	6.48775	2.61109	11.5124	3.24574	8.89294																								29.3328	8.05865	9.65551	11.3811	10.1195	6.28237
											22.1253	11.2055	11.3341	9.70151	13.5055	6.65125	2.22056	11.5045	3.28535	8.46642																								29.5544	7.90143	9.61415	11.5059	9.94608	6.24084
											22.23	11.2671	11.1216	9.88651	12.9773	6.4476	2.53101	11.2899	3.30198	8.94697																								29.4806	7.96586	9.65243	11.4967	9.99663	6.22006
											22.3025	11.2252	11.0447	9.87414	12.8473	6.56897	2.60933	11.4012	3.24251	8.88425																								29.7855	7.91867	9.60529	11.4116	9.90148	6.29639
											22.2634	11.3747	11.2499	9.85209	13.9129	6.37982	1.93288	11.3025	3.17541	8.55642																								29.2241	8.03489	9.6644	11.3869	10.0689	6.35655
											22.1651	11.2814	11.0361	9.8305	12.8591	6.68964	2.63591	11.2178	3.33385	8.9506																								29.4713	7.93692	9.61883	11.3981	10.0032	6.35076
											22.1764	11.2168	10.9576	10.0361	12.6851	6.51606	2.70916	11.3762	3.2339	9.09271																								29.3871	7.99154	9.62468	11.4239	10.1489	6.27734
											22.4528	11.0492	11.1671	9.82892	12.6301	6.73797	2.56855	11.4167	3.23457	8.91402																								29.5163	7.91107	9.63275	11.4164	9.99057	6.30766
											22.3374	11.1993	11.1891	9.81275	13.1556	6.43266	2.43555	11.3627	3.32668	8.74824																								29.1274	8.0463	9.65622	11.2976	10.1282	6.44018
											22.2852	11.2527	11.0608	9.80284	12.9452	6.63778	2.57623	11.3722	3.26653	8.80053																								29.3367	7.99833	9.70673	11.2795	10.022	6.44133
											22.3543	11.3672	11.0711	9.86776	13.1369	6.45364	2.4049	11.1824	3.23413	8.92773																								28.827	8.0184	9.64975	11.2414	10.1382	6.63284
											22.4632	11.3123	10.8822	10.0697	12.7252	6.36804	2.61331	11.2291	3.14622	9.19066																								29.311	7.94761	9.66364	11.4156	9.94794	6.44413
											22.3944	11.0911	11.0474	9.93476	12.8906	6.62655	2.51668	11.4167	3.23159	8.85037																								29.5518	8.00905	9.60329	11.3939	10.022	6.31128
											22.9512	11.0849	10.7722	10.1786	12.5939	6.36102	2.55323	11.2854	3.05102	9.16855																								29.3296	8.00233	9.66544	11.3931	10.0798	6.3081
											22.4813	11.3127	10.843	9.98511	12.541	6.51372	2.74728	11.2185	3.17418	9.1833																								29.5898	7.95823	9.57841	11.486	9.95749	6.32203
											22.8886	11.1414	11.0328	10.0532	13.2444	6.27311	2.14042	11.1933	3.11162	8.92114																								29.0246	8.04776	9.67923	11.3729	10.1696	6.39608
											22.124	11.1959	11.1276	9.73713	12.9608	6.76383	2.61275	11.4136	3.35237	8.71202																								29.3494	7.97359	9.64284	11.3689	10.0276	6.42753
											21.8752	11.3493	11.0615	9.4462	12.5873	7.16012	3.00564	11.4481	3.43174	8.63489																								29.2324	8.0434	9.63917	11.4428	10.0465	6.36527
											21.9748	11.323	11.0292	9.75803	12.8922	6.6758	2.77966	11.4634	3.34732	8.75662																								29.6184	7.92253	9.57486	11.444	9.9859	6.30302
											22.0976	11.4952	10.7833	9.8624	12.7049	6.61991	2.89528	11.0999	3.34186	9.09963																								29.0886	7.99528	9.61909	11.2781	10.1169	6.52547
											22.1224	11.2033	11.0105	9.77606	12.4443	6.82012	2.91853	11.5421	3.27303	8.88964																								29.5414	7.9778	9.58943	11.3922	10.0036	6.32904
											22.5038	11.1178	11.0791	9.8078	12.8988	6.55674	2.57501	11.4671	3.27101	8.72286																								29.516	7.97477	9.56789	11.4126	9.99258	6.35864
											22.2709	11.3378	11.0042	9.81526	12.7672	6.57313	2.70572	11.2305	3.30769	8.98764																								29.3848	7.99366	9.68672	11.3322	9.98342	6.39207
											21.9813	11.2621	11.0758	9.77268	13.064	6.62799	2.6838	11.507	3.3687	8.65681																								29.5872	7.97806	9.50912	11.4246	10.0155	6.30849
											22.6575	11.1001	11.165	10.0284	13.3935	6.33525	2.06352	11.2884	3.14869	8.8197																								29.3221	8.01204	9.62263	11.2864	10.0278	6.45479
											22.2588	11.3216	10.9264	9.94518	12.6093	6.53621	2.76543	11.3071	3.21905	9.111																								29.1321	8.0408	9.65857	11.2689	10.0867	6.48859
											22.2461	11.0996	11.098	9.78923	12.5981	6.84456	2.71847	11.3492	3.34181	8.9149																								29.1661	8.06768	9.65209	11.2669	10.1211	6.45214
											22.4492	11.1802	10.873	10.0716	12.5963	6.39944	2.74303	11.3462	3.21387	9.12724																								29.4343	7.99259	9.64248	11.2929	10.0188	6.47398
											22.3197	11.237	10.9942	9.92744	12.9146	6.47891	2.60326	11.3883	3.2443	8.89231																								29.3617	7.97308	9.62118	11.2282	10.0402	6.52244
											22.0025	11.3903	11.1962	9.72733	13.1051	6.59626	2.52954	11.3385	3.31544	8.79884																								29.2724	8.05058	9.61238	11.2218	10.0466	6.5133
											22.1863	11.1629	11.0395	9.88521	12.8363	6.6538	2.65595	11.436	3.29422	8.84974																								29.6056	7.92532	9.51428	11.4526	9.96361	6.32094
											22.0613	11.2802	11.1012	9.93085	12.7542	6.65021	2.59544	11.3142	3.22588	9.0864																								29.0556	8.0859	9.60385	11.2855	10.1018	6.47509
											22.3437	11.2558	11.0009	9.87369	12.7046	6.48835	2.72881	11.3961	3.25577	8.95223																								29.1165	7.99388	9.63596	11.3149	10.0866	6.56876
											22.3616	11.1446	11.0098	9.82275	12.8229	6.62828	2.68909	11.4303	3.31813	8.7725																								29.4831	7.96877	9.56907	11.4308	9.98461	6.35245
											22.6371	11.25	11.0682	9.92279	13.1253	6.44755	2.2789	11.1391	3.18128	8.94976																								29.5167	8.06701	9.52964	11.3582	10.0324	6.40153
											22.4804	11.1284	10.9512	9.96893	12.6527	6.49752	2.70058	11.2948	3.29072	9.03487																								29.1664	8.07322	9.6356	11.2327	10.0784	6.4695
											22.1204	11.2318	11.0934	9.80652	12.793	6.61007	2.72272	11.4529	3.32359	8.84564																								29.6811	7.95318	9.53295	11.4196	9.96042	6.33948
											21.7185	11.4209	11.1622	9.48072	12.8959	6.88217	2.89856	11.5091	3.46215	8.56983																								29.1857	8.0294	9.71397	11.236	10.0387	6.48212
											22.5559	11.1988	10.8325	9.95277	12.5572	6.57125	2.77329	11.2752	3.23087	9.0522																								29.887	7.94138	9.47519	11.3515	9.91577	6.41918
											22.1818	11.3331	10.95	9.77312	12.6826	6.64763	2.85442	11.3185	3.34465	8.91412																								29.3756	7.9328	9.50943	11.3685	10.0101	6.42984
											22.0523	11.2786	11.0813	9.60074	12.5934	6.89466	2.90875	11.3633	3.42495	8.80198																								29.1268	8.04278	9.59972	11.2139	10.147	6.51648
											22.5317	11.1774	11.0308	9.84797	12.6733	6.65457	2.60299	11.2286	3.25178	9.00091																								29.2419	8.00818	9.5903	11.2363	10.0342	6.56999
											22.475	11.263	10.9555	9.77101	12.7458	6.7735	2.64481	11.1706	3.27882	8.92197																								29.3491	8.06795	9.50756	11.2462	10.0383	6.55547
											22.2577	11.1779	11.1196	9.79531	12.4479	6.8645	2.71111	11.4437	3.18398	8.99831																								29.4448	7.99342	9.57929	11.3072	10.0296	6.4548
											22.4593	11.1946	10.9724	9.85938	12.9288	6.64666	2.55304	11.1638	3.32442	8.89771																								28.7195	8.10752	9.63566	11.0448	10.1456	6.80257
											22.5582	11.2493	10.9261	9.93797	12.59	6.5719	2.65131	11.213	3.17783	9.12435																								29.3705	7.9301	9.57494	11.2256	9.94633	6.54949
											22.1506	11.3124	10.9519	9.86821	12.9862	6.65912	2.62594	11.3523	3.26256	8.83068																								29.2243	7.99062	9.51773	11.2362	10.0809	6.61764
											22.1585	11.2869	11.0832	9.77576	12.6454	6.70971	2.74109	11.4522	3.23561	8.91169																								29.4292	7.97793	9.54186	11.3253	10.0468	6.39978
											22.7878	11.1268	10.8636	9.96558	12.7543	6.54609	2.56356	11.2706	3.17384	8.94777																								29.0859	8.07907	9.61697	11.1941	10.1568	6.56148
											24.5455	11.0254	10.34	9.65518	12.489	6.4204	2.76461	11.0464	3.14278	8.57075																								29.5159	7.95227	9.56607	11.336	9.92793	6.45929
											22.1232	11.2901	11.092	9.74361	12.8987	6.8307	2.59317	11.3232	3.28166	8.82361																								29.0401	8.10331	9.56179	11.1581	10.0852	6.64403
											22.2332	11.3324	11.0603	9.70734	12.7192	6.79091	2.6943	11.3382	3.24888	8.87525																								29.0681	8.05762	9.6058	11.099	10.1055	6.68051
											22.5124	11.2541	10.9445	9.87654	12.8657	6.55756	2.58438	11.1774	3.27323	8.95416																								29.2614	7.98317	9.5541	11.2712	9.96242	6.55399
											22.3692	11.2701	11.1285	9.69897	13.0552	6.57805	2.53626	11.363	3.31138	8.68939																								28.8952	8.05087	9.67738	11.1224	10.1107	6.72357
											22.4849	11.1853	11.0817	9.88779	12.5459	6.53977	2.65251	11.374	3.18636	9.06169																								29.0177	8.10517	9.53127	11.0912	10.0817	6.75474
											22.3222	11.2538	10.9144	9.89819	12.7477	6.62379	2.71391	11.3996	3.21823	8.90808																								29.0962	8.02925	9.52436	11.1905	10.0082	6.70822
											23.0953	11.0777	10.8697	10.1134	12.5239	6.2463	2.54529	11.2048	3.10047	9.22331																								28.8896	8.12905	9.53912	11.1699	10.1619	6.67674
											22.5949	11.1026	10.9176	10.014	12.6706	6.56295	2.60328	11.3263	3.18273	9.02499																								29.049	8.10725	9.58508	11.0525	10.1172	6.71531
											22.2847	11.208	11.0018	9.84547	12.7704	6.64282	2.69963	11.3626	3.30059	8.88403																								28.8713	8.09616	9.52593	11.1802	10.1001	6.73727
											22.2303	11.2461	11.0353	9.81319	12.7598	6.65701	2.70514	11.4532	3.25278	8.84718																								28.9619	8.04708	9.55833	11.1457	10.0569	6.71142
											22.4191	11.187	10.9724	9.95224	12.6097	6.44741	2.74321	11.4466	3.21768	9.00463																								29.1611	8.0297	9.53324	11.1024	10.0344	6.70399
											22.1104	11.2243	10.9892	9.93831	12.7068	6.63246	2.7355	11.4114	3.26579	8.9859																								29.3957	7.99224	9.42414	11.188	9.98118	6.71614
											22.1755	11.4271	11.1872	9.81735	12.7826	6.55088	2.52756	11.1907	3.20316	9.138																								28.6927	8.04149	9.61578	10.9449	10.12	6.88883
											22.3749	11.295	11.0349	9.80363	12.6979	6.51181	2.72135	11.3808	3.24962	8.9301																								28.8281	8.14816	9.53419	11.0041	10.1325	6.88509
											22.3404	11.1574	11.0206	9.872	12.779	6.66599	2.63596	11.4065	3.25362	8.86867																								28.6876	8.13349	9.61222	11.022	10.1764	6.78684
											22.2815	11.2752	10.8521	9.9217	12.5512	6.67434	2.8348	11.2288	3.28411	9.09617																								29.0572	8.07724	9.60425	10.9752	10.0225	6.79335
											22.5962	11.117	10.9346	10.0066	12.7748	6.54532	2.54213	11.2854	3.19546	9.00257																								28.998	8.05741	9.51881	11.0679	10.0736	6.8043
											22.4427	11.1783	11.0125	9.87848	12.5147	6.55285	2.76471	11.3862	3.24613	9.02346																								28.8907	8.04961	9.57622	11.0389	10.0589	6.89502
											22.6144	11.2141	11.0455	9.93361	13.2254	6.43203	2.27824	11.2031	3.20497	8.84872																								28.5859	8.05894	9.51272	11.0164	10.1309	6.95706
											22.3492	11.3664	10.8129	9.91667	12.9687	6.48292	2.6864	11.2998	3.24449	8.87248																								28.4891	8.17118	9.62636	10.9035	10.2096	6.89786
											21.8787	11.4262	11.1702	9.53739	13.2022	6.81369	2.63221	11.3395	3.4351	8.56476																								28.1815	8.21583	9.60271	10.8003	10.213	7.14991
											22.3403	11.2229	11.0379	9.80796	12.4563	6.70566	2.79193	11.4085	3.22291	9.00563																								28.7036	8.11588	9.58035	10.9433	10.123	6.9032
											21.9789	11.2154	11.058	9.84615	12.6279	6.68637	2.84147	11.3973	3.37763	8.971																								28.7136	8.079	9.61518	10.9255	10.0953	6.93029
											22.7276	11.1168	10.8898	9.95834	12.487	6.61324	2.67859	11.2691	3.17409	9.08556																								28.1205	8.16827	9.69462	10.6989	10.2175	7.14095
											22.5251	11.1524	10.9633	10.0073	12.9717	6.46793	2.47072	11.2885	3.21759	8.93549																								28.5391	8.17013	9.59236	10.8356	10.1797	7.08222
											22.7295	11.1156	11.0423	9.94167	12.993	6.41225	2.39039	11.3879	3.15623	8.83105																								28.2732	8.0924	9.64069	10.8	10.1281	7.21737
											22.4725	11.0148	11.0584	9.91156	12.5767	6.62927	2.68314	11.4633	3.262	8.92831																								28.34	8.19614	9.56693	10.8018	10.2349	7.04565
											21.783	11.3911	11.0969	9.92898	13.0786	6.59174	2.55166	11.3725	3.25765	8.94785																								27.6228	8.27332	9.77979	10.4695	10.3917	7.35295
											22.6309	11.1654	11.0926	9.80255	12.8225	6.54713	2.52188	11.3631	3.21499	8.83882																								28.2828	8.14154	9.69234	10.6946	10.2314	7.18801
											22.2325	11.3358	11.0422	9.7546	12.6858	6.57092	2.79044	11.3406	3.31649	8.93072																								27.5289	8.2264	9.76807	10.6024	10.2734	7.35708
											22.37	11.1989	10.9442	10.032	12.7065	6.44441	2.66342	11.273	3.25288	9.11459																								27.4447	8.29178	9.85354	10.5069	10.3048	7.31586
											22.4577	11.2189	10.9596	9.94586	12.578	6.49216	2.72118	11.3319	3.21409	9.08065																								27.1933	8.29055	9.88692	10.3129	10.2883	7.64707
											22.2096	11.363	10.8896	9.83641	12.8107	6.68914	2.73755	11.2535	3.28005	8.93042																								26.9985	8.38475	10.026	10.2547	10.4612	7.49958
											22.4305	11.1872	11.0032	9.84753	12.6056	6.64162	2.71665	11.3984	3.22839	8.94096																								27.0392	8.32771	9.9587	10.2558	10.3526	7.61074
											22.5026	11.1263	10.9969	10.0451	12.4531	6.37232	2.7311	11.3777	3.20362	9.19147																								26.6768	8.46518	9.99589	10.1991	10.523	7.56875
											22.3405	11.1705	10.9669	10.0161	12.4536	6.50434	2.78197	11.3906	3.21163	9.1637																								26.788	8.40199	10.0987	10.1274	10.4835	7.59411
											22.0914	11.2887	11.0905	9.867	12.9	6.58932	2.60757	11.3142	3.30181	8.94956																								26.2418	8.4999	10.1958	9.97109	10.5482	7.77618
											22.3351	11.3134	11.1059	9.82318	13.2672	6.48786	2.36883	11.2973	3.25041	8.75081																								26.2552	8.47858	10.3201	10.0496	10.6052	7.61152
											22.4141	11.2119	10.9291	10.0509	13.0381	6.45861	2.45834	11.1589	3.25679	9.02327																								25.975	8.56054	10.3869	9.85349	10.6327	7.78208
											22.2418	11.2822	11.0447	9.79558	12.7202	6.60495	2.73508	11.2783	3.33694	8.96032																								25.4475	8.57787	10.5872	9.69073	10.6667	7.9018
											21.9769	11.3527	11.2517	9.72321	13.1043	6.73644	2.44022	11.4041	3.23975	8.77081																								24.7229	8.68428	10.6838	9.38209	10.8466	8.18508
											22.0261	11.2101	11.1062	9.63417	12.7632	6.93785	2.79064	11.4326	3.40425	8.69495																								22.6392	8.90034	11.2182	8.64281	11.1118	8.89683
											22.532	11.1522	10.9683	9.87817	12.4687	6.6395	2.75701	11.3186	3.24014	9.04536																								22.2618	9.02971	11.3768	8.45598	11.1591	9.03522
											22.4614	11.3	11.0016	9.80097	12.724	6.50895	2.70033	11.2152	3.30565	8.98191																								22.0331	9.07758	11.6193	8.33846	11.2488	8.8854
											22.6764	11.316	10.879	9.87847	12.7015	6.34422	2.72339	11.4187	3.14654	8.91583																								21.8021	9.10752	11.7156	8.28432	11.3139	8.85088
											22.0347	11.4254	11.1146	9.64228	13.3578	6.70301	2.48278	11.3319	3.34035	8.56726																								21.6854	9.09791	11.5907	8.21675	11.2962	9.15811
											21.8525	11.3531	11.0237	9.63466	12.9939	6.89428	2.79476	11.2507	3.50169	8.70077																								21.0355	9.24698	11.9835	7.97021	11.4337	9.13497
											22.5343	11.1763	10.9038	9.97144	12.5777	6.58572	2.68747	11.2707	3.20475	9.08778																								21.0217	9.23526	12.0672	7.87981	11.4332	9.15713
											22.1427	11.284	11.1101	9.66503	12.8091	6.74714	2.73287	11.3538	3.37346	8.78184																								20.7968	9.27068	12.1863	7.78112	11.4251	9.20255
											22.1072	11.3222	10.9931	9.55786	12.9191	6.88731	2.8309	11.2992	3.47636	8.60677																								20.7741	9.30061	12.187	7.861	11.5307	9.11083
											22.3208	11.2262	10.9807	9.8964	12.7936	6.51397	2.69517	11.3026	3.3186	8.95191																								20.1835	9.37199	12.2465	7.72146	11.5775	9.37038
											22.099	11.2739	10.9319	9.79911	13.0192	6.70692	2.71921	11.2505	3.43273	8.76748																								20.8273	9.35918	12.3596	7.83136	11.5976	9.00966
											22.698	11.0352	10.8749	10.1883	12.5014	6.38571	2.62631	11.3507	3.1218	9.21765																								20.2872	9.33166	12.4999	7.61852	11.5271	9.23814
											22.6209	11.0848	11.026	10.0659	12.6505	6.40379	2.52815	11.3717	3.1383	9.11004																								20.6908	9.29734	12.2563	7.82604	11.5801	9.09971
											22.2074	11.1735	11.073	9.68036	12.5817	6.94039	2.79489	11.3982	3.33641	8.81419																								20.1123	9.44776	12.3912	7.6543	11.6303	9.28524
											22.4167	11.1039	11.0815	9.85294	12.59	6.6922	2.66426	11.4587	3.2191	8.9208																								20.411	9.29482	12.4947	7.74676	11.5629	9.12461
											22.5996	11.1941	10.8427	10.0607	12.7756	6.41309	2.60558	11.2583	3.18844	9.06203																								20.3145	9.43921	12.3998	7.72711	11.6531	9.14541
											22.5442	11.1833	11.04	9.81818	12.4827	6.59316	2.74013	11.3299	3.24507	9.02351																								20.3278	9.34251	12.5271	7.70661	11.6444	9.14311
											22.3142	11.2242	10.9343	9.90447	12.7958	6.62858	2.6802	11.2221	3.32212	8.97395																								20.0768	9.43571	12.6375	7.61711	11.6851	9.11281
											22.2873	11.1703	11.0462	9.87773	12.9995	6.68743	2.50335	11.3175	3.2826	8.8281																								20.1179	9.45321	12.5166	7.55901	11.6235	9.26031
											22.431	11.2014	10.9101	9.83493	12.4601	6.67331	2.87223	11.2918	3.31051	9.01464																								20.3088	9.40751	12.6767	7.62951	11.6939	9.09371
											22.2908	11.2785	11.0161	9.94697	12.6346	6.40107	2.73375	11.3647	3.23803	9.09537																								20.5737	9.40071	12.6386	7.75061	11.6618	8.84051
											22.3054	11.1892	11.1667	9.84412	13.323	6.50923	2.3257	11.3202	3.31615	8.70033																								20.5876	9.42781	12.6043	7.68181	11.6856	8.94061
											22.4005	11.3032	10.9485	9.89509	12.615	6.5567	2.71804	11.2953	3.20069	9.06696																								20.0777	9.49491	12.6341	7.66361	11.7819	9.08681
											22.8844	11.0699	10.6667	10.3576	12.6508	6.1763	2.58489	11.1638	3.12645	9.31907																								20.1537	9.45261	12.5817	7.68251	11.7093	9.18321
											22.1918	11.2443	11.1248	9.7748	12.7697	6.6692	2.66309	11.4579	3.25916	8.84515																								20.055	9.46631	12.691	7.57971	11.7392	9.14441
											22.2408	11.2271	10.9786	9.89236	12.8298	6.65284	2.65332	11.3499	3.26936	8.90589																								20.4847	9.41771	12.5144	7.78101	11.6444	9.09711
											22.1685	11.3062	11.1696	9.77032	12.7371	6.5291	2.68998	11.4214	3.27878	8.92897																								20.3825	9.47081	12.526	7.71571	11.7369	9.08171
											22.5187	11.1695	11.1035	9.77759	12.9464	6.74263	2.43039	11.4028	3.16879	8.73974																								20.6718	9.43131	12.6155	7.70911	11.6683	8.92241
											22.372	11.319	10.937	9.86462	12.9464	6.55984	2.59953	11.2216	3.27122	8.90873																								20.4702	9.45031	12.5195	7.74811	11.7059	9.05861
											22.3362	11.3805	11.0654	9.7881	13.0689	6.52045	2.49368	11.2061	3.26766	8.87306																								20.7139	9.37751	12.4849	7.78921	11.6302	9.05981
											21.7641	11.2975	11.0402	9.80093	12.5915	6.73236	2.9659	11.5679	3.34878	8.8908																								20.5992	9.36301	12.5318	7.73621	11.5855	9.12161
											22.3379	11.2504	11.2291	9.74652	12.8794	6.52979	2.52515	11.3648	3.27206	8.86487																								20.961	9.37261	12.4757	7.83371	11.6536	8.91471
											22.3554	11.2492	10.9252	9.88734	12.5233	6.59344	2.82668	11.2592	3.29667	9.08345																								21.0796	9.36621	12.5129	7.87671	11.6437	8.76761
											22.6216	11.1821	11.0773	9.88581	13.0236	6.45074	2.39781	11.2809	3.217	8.86306																								21.2688	9.24431	12.5784	7.90081	11.473	8.71981
											22.3658	11.24	11.102	9.98107	13.2514	6.3957	2.29057	11.2142	3.24	8.91931																								21.1073	9.21901	12.6353	7.91051	11.4801	8.81261
											22.2193	11.4426	10.9245	9.71163	12.8942	6.63661	2.76765	11.3083	3.30144	8.79387																								21.509	9.23151	12.4771	7.90661	11.4994	8.77061
											22.5993	11.1291	11.0427	9.92324	12.8679	6.48132	2.49496	11.3504	3.21045	8.90056																								21.1404	9.31781	12.529	7.83411	11.5187	8.84781
											22.2554	11.3262	10.8789	9.85962	12.8467	6.59543	2.74926	11.3607	3.26894	8.85891																								20.7259	9.37851	12.5597	7.80851	11.638	8.94831
											22.6089	11.0829	11.0196	10.0517	12.3616	6.49013	2.65705	11.3789	3.11636	9.23295																								21.3168	9.27031	12.4677	7.95711	11.5305	8.77831
											22.2708	11.3211	10.9348	9.89873	12.8653	6.65156	2.61199	11.2909	3.206	8.94884																								19.4303	9.74671	12.7216	7.52581	12.4631	9.59911
											22.444	11.1964	11.1836	9.87723	12.7456	6.45297	2.51946	11.4642	3.15367	8.9628																								18.8031	9.84721	12.8006	7.30161	12.6558	9.93401
											22.1617	11.2369	10.9969	9.84686	12.7509	6.62658	2.76821	11.4472	3.30022	8.86453																								18.9088	9.92091	12.747	7.43601	12.8018	9.77831
											22.1716	11.2897	11.0829	9.71317	12.9325	6.78314	2.61496	11.3984	3.27921	8.73445																								18.8413	9.94121	12.7189	7.42771	12.9177	9.87771
											23.0072	11.0125	10.839	10.2726	12.8684	6.27789	2.30543	11.1261	3.09008	9.20078																								19.3807	9.83051	12.6672	7.55481	12.611	9.62851
											22.7335	11.1213	10.8926	10.1023	12.663	6.46709	2.51251	11.1467	3.15655	9.20443																								19.9727	9.85181	12.6891	7.72011	12.805	9.28831
											22.7022	10.9859	10.9222	9.93571	12.4555	6.67137	2.73455	11.457	3.20177	8.93375																								20.0133	9.86031	12.6973	7.69691	12.8193	9.17341
											22.3847	11.2725	11.0708	9.85434	13.0982	6.59982	2.39709	11.24	3.22539	8.85713																								20.0369	9.89191	12.6273	7.73141	12.8645	9.25431
											22.4708	11.1858	10.9583	10.0242	12.7427	6.38907	2.62346	11.3816	3.18973	9.03434																								20.1549	9.84041	12.6791	7.77881	12.7801	9.24991
											22.495	11.3131	10.8431	10.0801	12.6414	6.40108	2.65134	11.0541	3.21038	9.3103																								20.1195	9.85331	12.7376	7.77881	12.8674	9.10761
											22.568	11.2403	10.7826	10.1376	12.3931	6.50945	2.72431	11.124	3.12999	9.3907																								20.1631	9.82731	12.7165	7.82381	12.8678	9.11551
											22.4156	11.1777	11.0124	9.97156	12.9028	6.58243	2.47686	11.2916	3.1996	8.96946																								20.2335	9.81875	12.7397	7.74323	12.8086	9.20687
											22.6307	11.2139	10.754	10.04	12.4952	6.48722	2.79259	11.1536	3.23342	9.19936																								20.4593	9.70375	12.7734	7.85361	12.7288	9.14261
											22.2915	11.1501	11.0486	9.79217	12.7794	6.83047	2.63343	11.3479	3.2984	8.82814																								20.4293	9.82566	12.7718	7.84396	12.852	9.09735
											22.0963	11.3216	10.9611	9.77111	12.8618	6.71438	2.77042	11.2962	3.37373	8.83344																								20.6429	9.78442	12.6725	7.83601	12.7607	9.03121
											22.696	11.1227	11.0001	9.8358	12.8408	6.57617	2.54575	11.1718	3.31881	8.89207																								20.7234	9.72871	12.8557	7.80901	12.6709	8.91581
											22.508	11.2087	10.9126	9.89937	12.7327	6.47754	2.72487	11.3708	3.2578	8.90768																								20.812	9.65901	12.8751	7.81581	12.5409	8.88011
											22.7549	10.923	10.9532	10.2296	12.3232	6.40515	2.61431	11.4139	3.08359	9.29911																								20.8983	9.61741	12.8336	7.84451	12.5776	8.93651
											22.5129	11.214	10.9698	9.92776	12.8512	6.50348	2.56165	11.3319	3.19891	8.92839																								20.9892	9.62011	12.8198	7.84511	12.5369	8.97271
											22.2748	11.1099	11.1749	9.86339	13.0194	6.68754	2.41559	11.3374	3.28936	8.8277																								20.6661	9.68121	12.9415	7.73861	12.5787	9.03781
											22.3493	11.36	10.8395	9.92019	12.8533	6.58807	2.66516	11.2094	3.22719	8.988																								21.1323	9.64591	12.9279	7.82331	12.5892	8.83231
											22.262	11.1744	11.1421	9.92903	12.5825	6.52791	2.65541	11.5261	3.16753	9.03306																								21.1025	9.57491	12.9662	7.89741	12.5148	8.78271
											22.0425	11.3338	11.1957	9.79274	12.875	6.47585	2.64749	11.5463	3.24284	8.84783																								21.0596	9.57841	12.846	7.88091	12.515	8.88421
											22.1515	11.1846	11.1343	9.79882	12.9626	6.68625	2.57392	11.492	3.28472	8.73135																								21.4916	9.53271	12.8871	7.92171	12.3966	8.78951
											22.3368	11.1801	11.0502	9.86201	12.4958	6.59972	2.78161	11.5792	3.17502	8.93956
											22.7863	11.2015	10.979	9.98672	13.1925	6.35784	2.26522	11.1196	3.19024	8.92106
											22.5297	11.2898	10.9655	9.8712	12.616	6.45464	2.71848	11.203	3.26276	9.08886
											22.1375	11.162	11.1407	9.75826	12.6723	6.77485	2.72766	11.4291	3.33896	8.85866
											22.2664	11.169	11.0046	9.82046	12.5924	6.70357	2.80896	11.4397	3.30313	8.89185
											22.2394	11.1694	10.8592	10.0598	12.5653	6.60395	2.79166	11.3993	3.21902	9.09295
											22.2755	11.3626	10.8345	9.93819	12.5932	6.57326	2.82496	11.2808	3.21679	9.10021
											22.2409	11.1448	11.1316	9.84906	12.5499	6.59659	2.75338	11.5106	3.26621	8.95707
											22.3392	11.223	10.9749	9.82816	12.5456	6.69401	2.7962	11.3741	3.25802	8.9667
											26.8031	8.90217	10.8083	11.0007	10.8351	5.96978	1.93576	11.7177	2.44779	9.57956
											23.318	10.6285	11.1193	9.95343	12.504	6.69045	2.3569	11.4842	3.11186	8.83334
											22.6879	11.1467	10.8866	9.88668	12.701	6.59472	2.6613	11.2629	3.25055	8.92173
											22.2544	11.3348	11.1365	9.8939	13.1383	6.54628	2.3328	11.1478	3.22851	8.98676
											22.2374	11.1748	11.0672	9.72014	12.9313	6.77363	2.65402	11.4104	3.36056	8.67063
											22.3269	11.2322	11.0058	9.82021	12.7538	6.71665	2.65878	11.3016	3.27181	8.91222
											21.8784	11.4309	11.03	9.67106	12.9983	6.67543	2.80736	11.4814	3.36513	8.66198
											21.9506	11.4563	11.0475	9.78559	12.8771	6.60739	2.72121	11.2863	3.31188	8.95611
											22.6349	11.0598	10.9137	10.0501	12.3727	6.53243	2.73605	11.3682	3.16501	9.16706
											23.0398	10.9909	10.8344	9.99169	12.6096	6.54626	2.58029	11.3541	3.12996	8.92291
											22.6249	11.2915	10.9074	9.87184	12.7521	6.47169	2.6511	11.2296	3.22016	8.9797
											22.1548	11.2644	11.0275	9.69531	12.8322	6.77128	2.76574	11.3324	3.39727	8.75904
											22.4167	11.1533	11.0501	9.94825	12.6381	6.41684	2.68878	11.5764	3.16817	8.94331
											22.3194	11.188	10.9441	9.94392	12.7349	6.52332	2.72898	11.3315	3.30819	8.97762
											22.3937	11.2509	11.1368	9.82218	12.8223	6.50179	2.55639	11.5169	3.15253	8.84651
											22.3823	11.1576	10.9464	10.0746	12.9991	6.53807	2.44003	11.2443	3.21153	9.006
											22.2301	11.3606	10.8666	9.80495	12.6838	6.66018	2.86114	11.274	3.31859	8.94008
											22.273	11.1624	10.9064	9.94567	12.6833	6.70695	2.73491	11.3943	3.2518	8.94128
											22.3565	11.3473	10.9469	9.89546	13.0918	6.60613	2.45652	11.0099	3.29734	8.99202
											22.3548	11.249	10.9981	9.80651	12.5343	6.6648	2.79408	11.3697	3.25075	8.9779
											22.8021	11.0228	10.8256	10.2074	12.38	6.36448	2.68241	11.3047	3.12115	9.28927
											22.4646	11.2945	10.9431	9.98906	12.7129	6.45548	2.60416	11.2455	3.16223	9.12839
											22.2601	11.1826	11.0041	9.89159	12.5313	6.68204	2.77629	11.3694	3.26761	9.03493
											22.6293	11.0502	10.9272	9.9633	12.444	6.63711	2.72932	11.395	3.19197	9.03267
											22.6235	11.2569	10.9064	9.97644	12.5719	6.43778	2.67215	11.2941	3.13549	9.12528
											22.1844	11.2838	10.9312	9.90578	12.6159	6.61268	2.81451	11.3881	3.25195	9.0116
											22.0491	11.3493	10.9246	9.8438	12.8833	6.62403	2.7789	11.3908	3.3128	8.84333
											22.1102	11.4071	11.0208	9.89001	13.0931	6.52313	2.52294	11.1583	3.29664	8.97782
											22.7209	11.1152	10.7702	10.1211	12.4301	6.55439	2.698	11.1421	3.16954	9.27858
											22.6966	11.2201	10.9118	9.86543	12.6314	6.55926	2.6688	11.1716	3.24507	9.02998
											22.1266	11.3625	10.9496	9.82148	12.9421	6.59358	2.71707	11.3099	3.32659	8.85063
											22.0134	11.3818	11.0262	9.6394	13.073	6.7871	2.70657	11.3513	3.38958	8.63169
											22.3421	11.2271	10.933	9.87577	12.6276	6.6873	2.74863	11.3095	3.26096	8.98818
											22.3382	11.1635	10.9493	9.93155	12.6922	6.59654	2.72383	11.4108	3.25783	8.93632
											22.2546	11.0804	11.1534	9.8025	12.8816	6.70159	2.58501	11.4039	3.36042	8.77663
											22.3523	11.1384	10.9221	9.95811	12.5379	6.70811	2.75124	11.342	3.24136	9.04862
											22.3038	11.2723	11.0168	9.87139	12.9136	6.65594	2.53904	11.3223	3.20709	8.89769
											22.5617	11.2338	10.8875	10.0198	12.5234	6.42647	2.72001	11.2558	3.18048	9.19108
											22.6991	10.9218	11.069	9.90866	12.3624	6.68925	2.68596	11.5962	3.14272	8.925
											22.5973	11.0937	11.2216	9.91577	13.2555	6.49031	2.14372	11.434	3.11866	8.72946
											21.8717	11.4048	10.9642	9.46203	12.9492	6.92591	2.99793	11.3498	3.57724	8.49727
											22.1838	11.2501	10.9301	9.83115	12.5734	6.73297	2.86859	11.3538	3.31876	8.95731
											22.5232	11.1747	10.8712	10.0069	12.6107	6.5569	2.68905	11.2093	3.2381	9.12
											22.3804	11.2155	10.9012	10.0008	12.5711	6.49017	2.76936	11.4815	3.15675	9.03325
											22.0968	11.2077	11.0419	9.84485	12.6594	6.64177	2.81012	11.4477	3.3334	8.91631
											22.2271	11.3646	11.0017	9.71445	12.699	6.65576	2.81053	11.2705	3.34361	8.91273
											22.2002	11.1556	11.0053	9.95064	12.5422	6.63738	2.77609	11.4075	3.2683	9.05667
											22.871	11.1035	10.909	10.1441	12.6955	6.29356	2.46483	11.1737	3.12906	9.21572
											22.5276	11.1406	10.9885	9.85163	12.6958	6.57927	2.68875	11.3779	3.27154	8.87844
											22.7892	11.1488	10.9164	9.88339	12.4191	6.52898	2.75712	11.3544	3.17307	9.0295
											22.4548	11.1873	11.0949	9.75615	13.2533	6.69747	2.35225	11.2473	3.30915	8.64747
											22.2317	11.3674	11.0057	9.65726	13.0325	6.69263	2.67436	11.3477	3.33617	8.6546
											22.1942	11.2715	11.1133	9.80996	13.1648	6.63151	2.44534	11.2944	3.30115	8.77377
											22.6313	11.1977	10.8749	9.976	12.6535	6.4986	2.65875	11.2746	3.18677	9.04782
											22.2869	11.0532	11.4983	9.72268	12.448	6.56698	2.60153	11.758	3.16864	8.89579
											22.3977	11.267	11.0138	9.74697	12.5742	6.59937	2.81983	11.4181	3.27131	8.89168
											22.1412	11.3513	10.9825	9.88144	12.8017	6.5745	2.70129	11.3369	3.24898	8.98006
											22.2112	11.165	11.0155	9.85669	12.4763	6.78093	2.81142	11.3213	3.31439	9.0473
											22.5479	11.244	10.9976	9.98273	13.0463	6.36635	2.41786	11.2277	3.20348	8.96612
											22.9453	11.0351	10.9424	9.97454	12.628	6.56925	2.49418	11.2316	3.14625	9.0335
											22.3363	11.2189	11.0063	9.8882	12.9572	6.61182	2.54364	11.3336	3.24901	8.85506
											22.2898	11.2482	10.9509	9.80255	12.866	6.76104	2.66407	11.4754	3.21048	8.7315
											22.8131	11.2255	10.9239	9.9877	12.974	6.31972	2.42174	11.2054	3.15544	8.97349
											22.3633	11.0889	11.0335	9.95648	12.6368	6.47616	2.72715	11.5424	3.24697	8.92835
											22.4248	11.0837	11.1057	9.80201	12.5616	6.85447	2.62989	11.298	3.27283	8.96709
											22.6265	11.1834	10.9412	10.1758	13.2672	6.33212	2.17858	11.1402	3.12105	9.03405
											22.6136	11.3246	10.9815	9.76675	13.0826	6.65259	2.41461	11.1248	3.22226	8.81671
											22.5105	11.1396	11.1348	9.92999	13.3506	6.44916	2.21058	11.3482	3.20907	8.71758
											22.2749	11.2258	10.9464	9.93598	12.8888	6.63675	2.60442	11.2627	3.27714	8.94714
											22.7542	11.1644	10.7777	10.0649	12.7086	6.42363	2.63215	11.2429	3.17172	9.05967
											22.4953	11.2261	10.9042	10.0032	12.6783	6.4696	2.65743	11.3246	3.17394	9.0673
											22.6773	11.0947	11.0039	9.99492	12.924	6.49564	2.40558	11.2753	3.18461	8.94398
											22.5149	11.2098	10.8024	10.0218	12.4671	6.53002	2.8153	11.321	3.18421	9.13342
											22.3308	11.2438	11.0132	9.8747	12.8755	6.57111	2.60132	11.3574	3.24535	8.8868
											22.6017	11.0502	10.8624	9.96255	12.2891	6.6824	2.8628	11.3317	3.24726	9.10992
											22.0625	11.4167	10.8831	9.77738	12.7214	6.69936	2.88955	11.3115	3.32752	8.91101
											22.441	11.2203	10.9362	9.9707	12.5703	6.50332	2.72539	11.2997	3.21907	9.11399
											22.7004	11.0296	10.9669	10.2083	12.497	6.39073	2.51588	11.3226	3.07156	9.29702
											22.5964	11.2662	10.9301	9.8836	12.5773	6.55346	2.68956	11.3107	3.15421	9.03853
											22.8222	11.1451	10.7367	10.1866	12.494	6.32185	2.68517	11.3301	3.0626	9.21564
											22.4862	11.2049	11.0218	9.88759	13.1499	6.49822	2.42092	11.4243	3.19178	8.71441
											22.2371	11.2343	11.0081	9.90527	12.9743	6.57012	2.57869	11.2167	3.34446	8.93094
											22.2319	11.1951	11.1134	9.76512	12.9375	6.71353	2.58235	11.4317	3.29465	8.73478
											22.4233	11.2552	10.9968	9.93727	12.9771	6.52998	2.47269	11.1832	3.24073	8.98374
											22.4402	11.1768	11.0518	9.90329	12.9047	6.57309	2.49694	11.281	3.24656	8.92563
											22.2955	11.2544	11.3076	9.81746	12.9984	6.42676	2.38727	11.3018	3.26237	8.94843
											22.286	11.2037	10.8722	9.90265	12.603	6.63782	2.85949	11.3182	3.33628	8.98067
											22.4042	11.3302	10.9752	9.95859	12.5292	6.33077	2.76872	11.2872	3.21239	9.2035
											22.1372	11.1593	11.1176	9.75391	12.5773	6.75402	2.81417	11.5372	3.31335	8.83597
											22.372	11.2876	10.9013	9.92891	12.546	6.52101	2.8066	11.361	3.20551	9.07013
											22.1583	11.0716	11.2536	9.90604	12.7155	6.58381	2.57561	11.5532	3.24815	8.93432
											22.6735	11.1653	10.756	10.0977	12.4127	6.48507	2.77779	11.279	3.14042	9.21264
											22.4966	11.117	10.7808	10.0716	12.6767	6.59978	2.70195	11.3639	3.18987	9.00175
											22.8256	11.1258	10.7647	10.1958	12.3231	6.5166	2.64467	11.1422	3.05425	9.40729
											22.5306	11.1948	10.8372	9.92043	12.5326	6.6033	2.81163	11.3548	3.22213	8.99247
											22.3805	11.15	11.1159	9.687	12.5641	7.03126	2.63394	11.2572	3.27039	8.90974
											22.193	11.3192	10.9563	9.76604	12.68	6.61615	2.8734	11.3768	3.34372	8.87535
											21.9494	11.3306	11.1919	9.60366	12.9754	6.75891	2.69682	11.4333	3.39883	8.66115
											22.3089	11.1269	11.1133	9.63961	12.4133	6.83796	2.90377	11.6094	3.29907	8.74783
											21.8703	11.2595	11.1699	9.76172	13.1955	6.7006	2.55525	11.4953	3.36016	8.63175
											22.4313	11.2777	10.9853	9.87164	12.827	6.5225	2.61377	11.2074	3.27726	8.9861
											22.167	11.1592	11.0017	9.85624	12.7593	6.70673	2.74571	11.371	3.36112	8.87197
											22.3944	11.2046	11.0773	9.89973	13.0599	6.4717	2.45781	11.3433	3.2525	8.8388
											22.4252	11.2008	10.9425	9.90626	12.4717	6.62061	2.79236	11.2711	3.2635	9.10609
											22.7839	11.1015	10.8494	10.0274	12.4156	6.48934	2.7283	11.1882	3.21564	9.2008
											22.5728	11.218	10.8351	10.1077	12.5753	6.34999	2.70004	11.2407	3.17568	9.22481
											22.2151	11.2491	11.0784	9.85512	12.774	6.56248	2.666	11.3852	3.27531	8.93925
											22.2269	11.3059	10.8416	9.82403	12.4401	6.85137	2.92213	11.2659	3.27721	9.04494
											22.4271	11.2615	11.1665	9.77855	13.3878	6.5306	2.25147	11.2158	3.29015	8.69059
											22.6301	11.2063	11.043	9.86259	12.9073	6.48204	2.48145	11.2542	3.22601	8.90709
											22.4755	11.1589	10.7846	10.144	12.5998	6.41054	2.74876	11.3105	3.20647	9.16096
											21.7829	11.3741	11.0435	9.77411	12.8715	6.70269	2.81668	11.5079	3.33325	8.79335
											22.6158	11.0874	10.929	9.90146	12.7692	6.92727	2.4699	11.1579	3.19613	8.94597
											23.1731	11.0385	10.8567	10.0465	12.1762	6.40647	2.70006	11.2405	3.07677	9.28524
											24.0779	10.9536	10.5227	9.61925	11.9485	5.65545	3.5405	12.0666	3.26601	8.34956
											22.4507	11.1755	11.059	9.87634	12.7778	6.63415	2.54551	11.3446	3.2039	8.93247
											22.9134	11.1443	11.1029	9.88059	12.4313	6.45094	2.54681	11.3102	3.08644	9.13318
											22.339	11.1778	10.9691	9.77187	12.591	6.80506	2.80285	11.2822	3.35215	8.90893
											22.0576	11.1304	11.2042	9.71956	12.7876	6.80255	2.68736	11.5724	3.33183	8.70656
											22.6448	11.201	10.8135	9.87047	12.9576	6.72041	2.55424	11.1191	3.27984	8.83904
											22.4578	11.3408	10.9124	9.83762	12.6941	6.56042	2.72344	11.1602	3.27576	9.03754
											22.7949	11.0447	10.9642	10.0415	12.6284	6.49813	2.51102	11.2445	3.16264	9.10996
											22.0257	11.2725	10.9768	9.67348	12.8514	6.78174	2.88369	11.4689	3.42667	8.63919
											22.4606	11.0969	10.9919	9.98116	12.4219	6.50276	2.78586	11.4766	3.20573	9.07662
											22.7453	11.0815	10.891	10.0886	12.687	6.47268	2.52703	11.2656	3.14234	9.0989
											22.4582	11.2378	10.9026	9.89228	12.6591	6.55906	2.74826	11.2779	3.27175	8.99305
											22.6344	11.1094	10.8804	9.99882	12.8283	6.5176	2.57584	11.2847	3.23339	8.93715
											22.0789	11.2844	11.0383	9.68153	12.5577	6.83718	2.90093	11.376	3.36883	8.87617
											22.0222	11.3408	11.0327	9.71136	13.2757	6.76366	2.55429	11.284	3.3967	8.61852
											22.4863	11.2349	10.8789	9.96777	12.6326	6.52193	2.71562	11.3028	3.20202	9.05706
											22.8921	10.8349	10.8199	10.3361	12.3104	6.44273	2.60425	11.4111	3.04611	9.3023
											22.2724	11.2862	11.0037	9.82981	12.6193	6.58863	2.78342	11.3342	3.28437	8.99795
											22.3088	11.307	10.8294	10.0686	12.6331	6.33223	2.81153	11.3222	3.22794	9.15935
											22.1066	11.3161	11.0857	9.73795	12.6468	6.69606	2.79351	11.2926	3.35537	8.96928
											22.3871	11.1477	11.1365	9.83371	13.1101	6.65817	2.3783	11.3191	3.26793	8.76143
											21.7171	11.3192	11.2396	9.58402	13.1392	6.79612	2.69002	11.5235	3.45817	8.53302
											22.13	11.3252	11.1014	9.75007	12.7029	6.6721	2.73328	11.425	3.26106	8.89896
											22.5011	11.1748	10.8993	9.95215	12.6185	6.64815	2.67681	11.2837	3.20666	9.0388
											22.4581	11.1427	11.0634	9.86146	12.5104	6.65029	2.69493	11.3929	3.21389	9.01199
											22.6345	11.1239	10.9711	10.0052	12.789	6.4299	2.53494	11.3467	3.17979	8.98505
											22.3544	11.3031	11.1097	9.73517	12.8547	6.57104	2.61363	11.4034	3.24228	8.81267
											22.3905	11.0843	11.0066	9.96054	12.4849	6.61481	2.74531	11.5112	3.19326	9.00863
											22.2068	11.1978	10.9915	9.90009	12.6785	6.68483	2.72425	11.4776	3.22127	8.91743
											22.1229	11.3404	11.0464	9.76612	12.9231	6.67255	2.65754	11.3492	3.298	8.82378
											22.3823	11.2396	11.1624	9.77632	13.4796	6.54846	2.23603	11.3143	3.28003	8.58089
											22.4116	11.1157	11.0555	9.88616	12.8377	6.66449	2.54348	11.2865	3.28848	8.91031
											22.9111	11.0523	10.7316	9.91287	12.4632	6.61176	2.83594	11.379	3.21749	8.88475
											22.3514	11.2066	11.0996	9.74132	12.6539	6.69692	2.70442	11.4571	3.249	8.83981
											22.6808	11.1384	11.0573	9.94345	12.9977	6.39816	2.39115	11.337	3.18104	8.87503
											22.5207	11.2243	11.0147	9.86321	12.7567	6.44681	2.64804	11.2605	3.29102	8.97411
											22.2524	11.2648	11.1879	9.78596	13.5676	6.55861	2.20424	11.284	3.30793	8.58646
											22.1564	11.2297	11.1179	9.71265	12.9361	6.79853	2.60884	11.3515	3.34501	8.74338
											22.7135	11.2375	10.8462	9.75684	12.8518	6.81281	2.58856	11.2364	3.20098	8.75539
											22.6011	11.1984	10.8765	9.93057	12.7497	6.52238	2.65719	11.2621	3.24015	8.96185
											22.267	11.0012	10.8823	9.04519	12.3078	7.98609	3.29191	10.8596	3.95623	8.4026
											22.0641	11.2884	11.0086	9.76807	12.7381	6.7851	2.78602	11.3639	3.33262	8.86509
											22.6512	11.0858	10.9381	9.97853	12.5486	6.73212	2.57435	11.3692	3.08996	9.03213
											22.1969	11.1757	11.1279	9.82498	12.8362	6.64743	2.61868	11.4916	3.26729	8.81326
											21.5156	11.4799	11.1403	9.57373	12.9996	6.86675	2.85496	11.3565	3.50645	8.70623
											22.2731	11.2543	11.0332	9.71638	13.0811	6.67605	2.60818	11.3206	3.37747	8.65955
											22.4297	11.3376	10.9989	9.82475	13.0505	6.53144	2.50166	11.3032	3.20619	8.81617
											22.2913	11.2938	11.0412	10.0643	13.1916	6.35207	2.33015	11.2381	3.18051	9.01699
											22.6713	11.076	10.8791	10.0371	12.5587	6.511	2.6749	11.3733	3.16926	9.04934
											22.1878	11.363	10.9491	9.64486	12.6682	6.72363	2.93493	11.3208	3.40126	8.80654
											22.401	11.1907	11.0536	9.86762	12.9015	6.59288	2.53507	11.2786	3.27802	8.90094
											22.6191	11.1276	11.1255	9.92022	13.1989	6.49379	2.23421	11.1971	3.23397	8.84971
											22.5447	11.0911	10.9309	10.1148	12.5743	6.44724	2.62561	11.4336	3.11596	9.12176
											22.7568	11.1108	10.8756	10.1235	12.8539	6.40166	2.4394	11.2924	3.10226	9.04368
											22.4243	11.2194	11.0332	9.95514	12.7513	6.48123	2.57394	11.2868	3.21332	9.06145
											22.3621	11.2908	10.9218	9.83598	12.7613	6.66203	2.70396	11.248	3.27588	8.93806
											22.3097	11.2144	10.9266	9.95065	12.5897	6.58817	2.7717	11.3617	3.24156	9.04576
											22.4186	11.2551	10.9076	9.88953	12.7158	6.66533	2.67494	11.2884	3.21508	8.96957
											21.9017	11.3746	11.0547	9.71002	12.896	6.69571	2.80112	11.3655	3.40606	8.79451
											22.5857	11.1062	11.1012	9.94375	12.822	6.40346	2.49639	11.4461	3.1821	8.91303
											22.4031	11.1684	11.0124	9.92683	12.8879	6.48405	2.58895	11.3317	3.28859	8.908
											22.528	11.2709	11.038	9.83286	12.8631	6.48163	2.55778	11.3178	3.21355	8.89638
											22.7139	11.1078	10.7801	10.2311	12.6507	6.39052	2.55757	11.1367	3.15111	9.28057
											22.1513	11.2574	11.0103	9.83892	12.8305	6.71824	2.67223	11.3535	3.28699	8.8805
											22.0515	11.2169	11.1181	9.83507	12.9886	6.72845	2.55392	11.4985	3.24966	8.75932
											22.4641	11.0964	10.8989	10.0814	12.5414	6.5071	2.71505	11.2855	3.24375	9.16642
											22.4143	11.1143	11.0707	9.80987	12.9448	6.62582	2.56948	11.3487	3.34631	8.75578
											22.4941	11.2592	10.9936	9.98354	12.5284	6.40784	2.67733	11.3208	3.14911	9.18594
											22.1593	11.1934	11.0672	9.79185	12.8523	6.6914	2.69245	11.5326	3.28929	8.73034
											22.9716	10.9847	10.734	10.0777	12.3896	6.62138	2.70491	11.2815	3.13313	9.10143
											22.5787	11.1253	10.8045	10.0509	12.5671	6.66953	2.67411	11.2182	3.18805	9.12365
											22.5592	11.1913	11.0309	9.88197	12.6836	6.48936	2.6254	11.3794	3.19742	8.96147
											22.6316	11.2459	10.8301	9.85129	12.5204	6.58146	2.82858	11.2509	3.25551	9.00421
											21.1864	11.484	11.8484	9.43031	13.4242	6.80748	2.27025	12.0178	3.15507	8.37614
											22.4224	11.1626	10.9298	9.88982	12.4975	6.68151	2.79768	11.3661	3.24743	9.00509
											22.3094	11.2384	11.0344	9.82158	12.5396	6.63678	2.78179	11.3821	3.25796	8.99801
											22.274	11.2107	11.0214	9.81608	12.609	6.74079	2.74538	11.4414	3.23436	8.90688
											22.6737	11.2616	10.9692	9.94125	12.8145	6.42372	2.50249	11.2183	3.15474	9.04055
											21.9918	11.2975	11.1828	9.71661	13.1718	6.68078	2.52967	11.3937	3.36126	8.67404
											22.5051	11.2034	11.0205	9.91029	12.7257	6.50892	2.59785	11.2533	3.24266	9.03233
											23.0064	10.9939	10.8015	10.0573	12.347	6.51666	2.70889	11.3758	3.09857	9.09399
											22.4543	11.1084	11.0066	9.826	12.6781	6.67726	2.70765	11.466	3.26343	8.81233
											22.3862	11.2013	11.115	9.76391	12.625	6.62316	2.70317	11.4773	3.2338	8.87112
											22.4426	11.2209	10.9876	9.8865	12.8446	6.63246	2.55558	11.3094	3.20666	8.91366
											22.32	11.295	11.0013	9.79384	12.9617	6.5608	2.63623	11.2182	3.36125	8.85174
											22.3341	11.1998	11.1368	9.78262	12.7765	6.65087	2.5998	11.2855	3.31366	8.9203
											22.6013	11.1877	10.9688	10.0699	13.1726	6.36586	2.2977	11.2761	3.13617	8.92395
											22.1931	11.2649	11.0706	9.70234	12.6762	6.81465	2.75275	11.353	3.31693	8.85544
											22.4789	11.218	11.0192	9.90517	12.7434	6.49604	2.60721	11.35	3.2047	8.97732
											22.4254	11.1278	10.9675	9.9024	12.8478	6.63477	2.61209	11.3624	3.27439	8.84542
											22.4711	11.2679	10.8249	9.84643	12.6627	6.61986	2.81732	11.2118	3.32137	8.95663
											21.9062	11.3455	10.9476	9.78083	12.8916	6.84543	2.7767	11.3258	3.36095	8.81938
											22.1521	11.485	10.9351	9.7302	12.7673	6.61811	2.82347	11.3439	3.26041	8.88447
											22.8366	10.9586	10.9043	9.94721	12.4086	6.6644	2.71453	11.3729	3.20502	8.98786
											22.7189	11.0943	11.1284	9.96311	13.0028	6.40799	2.29658	11.2755	3.177	8.93541
											22.6941	11.2568	10.8883	9.9046	12.7109	6.49365	2.62936	11.1283	3.23662	9.05736
											21.9785	11.4366	10.8838	9.69924	12.6837	6.79475	2.96989	11.289	3.39124	8.8732
											22.3074	11.1805	11.0425	9.70331	12.831	6.92304	2.63264	11.4957	3.23214	8.65163
											22.5121	11.1248	10.9677	9.84896	12.615	6.62175	2.7466	11.4144	3.2682	8.88058
											22.9423	11.0976	10.7916	10.2576	12.5128	6.22452	2.56205	11.1529	3.089	9.36966
											22.3023	11.2154	11.1043	9.85825	12.5229	6.55634	2.73844	11.3621	3.26391	9.0759
											22.4427	11.2198	11.025	9.85706	12.821	6.47638	2.63792	11.4092	3.24672	8.86414
											22.6697	11.1011	10.84	10.0761	12.753	6.53527	2.55388	11.187	3.20657	9.07736
											21.8851	11.3723	11.0338	9.79483	12.8525	6.59178	2.82033	11.4546	3.35033	8.84454
											22.6546	11.0803	11.0214	9.94027	12.7873	6.46377	2.54468	11.3989	3.20983	8.89899
											21.9783	11.2156	11.2516	9.79906	13.074	6.65203	2.4891	11.555	3.26653	8.71866
											22.4988	11.1617	10.9108	9.8147	12.6083	6.72591	2.77691	11.3325	3.28974	8.88067
											22.1288	11.2914	11.0389	9.73406	12.63	6.78644	2.80805	11.4167	3.28888	8.87684
											22.3905	11.2571	10.9477	9.93223	12.721	6.53141	2.67019	11.2353	3.25768	9.05691
											22.3279	11.1381	11.1168	9.82494	12.9503	6.67038	2.5155	11.3906	3.28457	8.78084
											22.4287	11.2839	10.8954	9.85276	12.6237	6.63592	2.76559	11.2184	3.27407	9.0215
											22.3605	11.1953	10.9017	10.0071	12.5429	6.4957	2.79373	11.4118	3.21233	9.07899
											22.2567	11.2572	11.1066	9.7827	12.5988	6.55709	2.77588	11.504	3.24835	8.91265
											22.2557	11.2692	10.9711	9.70955	12.5734	6.84846	2.84569	11.2825	3.34245	8.90202
											22.0977	11.2665	11.1033	9.60574	12.5764	6.8333	2.90402	11.4481	3.38641	8.77857
											22.2908	11.1016	11.1357	9.79749	12.6418	6.73614	2.68135	11.499	3.27014	8.84598
											22.489	11.1091	10.9283	9.96235	12.6412	6.57113	2.70363	11.4544	3.20685	8.93402
											22.4718	11.1374	11.0168	9.98551	12.7711	6.40276	2.60585	11.3424	3.25967	9.00675
											22.4909	11.1524	11.114	9.9252	12.7791	6.52911	2.48522	11.3074	3.2019	9.01474
											22.3547	11.2372	10.9832	9.80963	12.6643	6.61286	2.77308	11.4076	3.27418	8.88322
											22.2183	11.2501	11.026	9.82775	12.7858	6.72045	2.65895	11.3353	3.2725	8.90494
											22.6522	11.1608	10.8952	9.97067	12.7451	6.54852	2.58046	11.2894	3.17532	8.98234
											22.3065	11.2746	10.9164	9.87769	12.718	6.5989	2.75684	11.3147	3.27945	8.95677
											22.2785	11.3152	11.0652	9.76412	13.0582	6.61921	2.53459	11.262	3.30831	8.79461
											22.333	11.305	10.8966	9.94651	12.7318	6.51876	2.71285	11.2586	3.24463	9.05235
											22.1927	11.1965	11.0283	9.83931	12.6471	6.68915	2.76997	11.4153	3.30146	8.92023
											22.6952	11.1169	10.8517	10.0025	12.6266	6.56108	2.64675	11.346	3.15378	8.99952
											22.5744	11.1349	10.949	9.94564	12.8623	6.53304	2.55304	11.3584	3.21174	8.8776
											22.8517	11.0852	10.917	10.0113	12.5104	6.48568	2.60521	11.2779	3.13735	9.11822
											22.6778	11.2066	10.9324	9.90917	13.0452	6.44888	2.46892	11.3081	3.20025	8.80258
											22.8056	11.161	10.929	9.9646	12.5809	6.47957	2.59315	11.2154	3.15961	9.11133
											22.1472	11.2595	11.0139	9.76624	12.8189	6.71227	2.75114	11.4311	3.32193	8.77792
											22.0687	11.1577	11.3128	9.77013	13.0996	6.6261	2.44101	11.3716	3.38245	8.76983
											22.8489	11.1562	10.9904	9.90919	12.5342	6.46061	2.6005	11.2671	3.151	9.08197
											22.2701	11.2171	10.9915	9.86252	12.4384	6.69101	2.83762	11.3695	3.25962	9.06257
											22.4751	11.2835	10.9218	9.86142	12.7696	6.54879	2.67809	11.2671	3.24849	8.94612
											22.9436	11.0979	10.6792	10.1938	12.3636	6.37612	2.7362	11.1385	3.13935	9.3318
											22.0033	11.2221	11.0704	9.7252	12.8985	6.88994	2.69768	11.3765	3.38266	8.73368
											22.8379	11.2508	10.7817	9.93491	12.5631	6.52918	2.69299	11.0951	3.19248	9.12181
											23.0842	11.1936	10.7962	10.109	12.7437	6.25557	2.456	11.0281	3.11479	9.21887
											22.475	11.341	10.9416	9.85548	12.8334	6.50275	2.6266	11.2945	3.19617	8.93349
											22.8068	10.9625	10.7913	10.1206	12.452	6.58456	2.685	11.3901	3.13017	9.07693
											22.558	11.0385	11.0777	10.0133	12.4732	6.44195	2.65287	11.5189	3.14941	9.07627
											22.3277	11.1709	10.9014	10.0507	12.5346	6.66602	2.69837	11.3872	3.1377	9.12538
											22.2872	11.3604	11.1497	9.68852	12.8629	6.39892	2.70657	11.37	3.34799	8.82782
											22.4469	11.1694	11.1238	9.9759	12.6856	6.40713	2.54591	11.3488	3.19074	9.10574
											22.2047	11.254	11.0697	9.89676	13.2717	6.55302	2.39195	11.3077	3.28157	8.76889
											22.421	11.2418	10.949	9.83979	12.7416	6.54743	2.73495	11.3397	3.2895	8.89527
											22.9604	11.0229	11.0098	10.0161	12.6274	6.42997	2.45375	11.3262	3.098	9.05535
											22.5386	11.1815	11.0879	9.94758	12.9483	6.48267	2.38947	11.2874	3.17299	8.96365
											22.6155	11.0166	10.8848	10.0737	12.4384	6.52105	2.74446	11.3335	3.23188	9.14001
											22.08	11.2358	11.1362	9.71285	13.044	6.70527	2.6185	11.4932	3.34449	8.62973
											21.7398	11.2173	11.0621	9.75205	12.757	6.85215	2.90287	11.438	3.48458	8.79404
											22.5886	11.182	10.9548	10.0214	12.9051	6.39425	2.48885	11.3492	3.15288	8.96294
											22.4235	11.2995	11.142	9.89228	13.7217	6.36756	2.05965	11.188	3.2476	8.65823
											22.5405	11.0862	11.0465	9.70418	12.4873	7.13952	2.62223	11.4619	3.11535	8.79628
											22.5563	11.2136	10.9849	9.86603	12.762	6.59768	2.58414	11.3086	3.1963	8.9304
											22.1146	11.3481	10.8943	9.89819	12.8069	6.66092	2.74271	11.2412	3.29824	8.9948
											22.3101	11.3808	11.05	9.77286	12.7478	6.53074	2.69284	11.17	3.31587	9.02885
											21.853	11.2673	11.2186	9.68944	12.9376	6.80352	2.66074	11.4012	3.40463	8.76386
											22.7796	11.0973	11.0044	10.0773	12.6027	6.34188	2.50756	11.2297	3.14734	9.2122
											22.3567	11.1334	11.0421	9.83484	12.7747	6.60636	2.68743	11.3803	3.33904	8.84527
											22.1173	11.2763	11.133	9.76145	13.3776	6.69565	2.37184	11.3065	3.33608	8.62432
											22.39	11.2041	11.0622	9.87947	12.4648	6.61078	2.72359	11.2446	3.26231	9.15823
											22.3917	11.145	10.8575	9.79195	12.5713	6.91268	2.84017	11.2717	3.34622	8.87175
											22.3025	11.1806	11.0947	9.68005	12.584	6.75952	2.81206	11.5166	3.30261	8.76746
											22.7722	11.125	11.0276	10.0445	13.1129	6.39348	2.22601	11.2647	3.10113	8.93245
											22.7003	11.1724	11.1369	9.90008	13.4181	6.4406	2.09678	11.2624	3.15732	8.71513
											21.9802	11.3355	11.1348	9.63691	12.9783	6.71212	2.72504	11.408	3.40997	8.67917
											22.4791	11.2793	10.9214	9.93559	12.6211	6.51674	2.69485	11.2784	3.1871	9.08642
											22.471	11.1718	10.829	9.95161	12.8355	6.61003	2.67554	11.288	3.27767	8.88977
											22.5879	11.1763	10.8733	9.87234	12.9632	6.72497	2.52728	11.2141	3.25074	8.80978
											22.5952	11.3382	10.9067	9.8912	12.5293	6.47615	2.73248	11.2343	3.16355	9.13286
											22.6746	11.0579	10.9326	10.0213	12.5803	6.38904	2.69555	11.3785	3.23335	9.03689
											22.1319	11.2205	10.9254	9.98455	12.6836	6.60022	2.77188	11.3614	3.28526	9.03525
											22.4757	11.2313	10.8876	10.002	12.5499	6.42756	2.76776	11.3171	3.21245	9.12863
											22.4783	11.2357	10.8888	10.0082	12.7001	6.44845	2.67119	11.2437	3.22618	9.09939
											22.5706	11.0693	11.1169	9.99151	13.0118	6.53802	2.2967	11.334	3.15983	8.9114
											22.4262	11.2205	11.0223	9.83358	12.4598	6.64169	2.77079	11.2619	3.26988	9.0933
											22.4615	11.2806	11.0148	9.73711	12.5679	6.60752	2.789	11.3381	3.27116	8.93226
											22.4006	11.2034	10.9216	10.05	12.8636	6.42832	2.58023	11.2978	3.22252	9.03204
											22.7819	11.0868	11.0959	9.98213	12.9707	6.37054	2.31688	11.2206	3.19639	8.97808
											22.4444	11.1799	10.9342	9.9199	13.0385	6.71007	2.45931	11.143	3.28414	8.88662
											22.7399	11.1593	10.8197	10.0087	12.5962	6.51209	2.66712	11.146	3.2225	9.12843
											22.7064	11.111	10.8913	9.97331	12.6958	6.55319	2.60202	11.2904	3.19503	8.98156
											22.1962	11.2492	10.9395	9.87883	12.8466	6.71897	2.67558	11.3322	3.27886	8.88409
											22.1376	11.2524	11.1387	9.61443	12.8122	6.73494	2.7783	11.452	3.40136	8.67805
											22.2028	11.2617	11.0783	9.77252	12.8165	6.6332	2.6916	11.3864	3.31526	8.84176
											22.1385	11.3761	11.0754	9.82974	12.8047	6.54987	2.66009	11.4201	3.20212	8.94331
											22.3985	11.3749	10.8778	9.78369	12.6451	6.68646	2.78656	11.2158	3.25241	8.97884
											22.272	11.296	10.917	9.95332	12.8782	6.51256	2.6506	11.2207	3.28917	9.01042
											22.3115	11.1941	10.9994	9.78269	12.8459	6.72288	2.68049	11.2195	3.39633	8.84719
											22.1677	11.3886	10.9111	9.86723	12.7535	6.54588	2.79371	11.2785	3.29196	9.00188
											22.8443	11.1547	10.9941	9.92308	12.8559	6.46339	2.42354	11.3003	3.12085	8.91978
											22.3042	11.161	10.9601	9.79875	12.6138	6.78209	2.81034	11.5076	3.26266	8.79949
											22.3342	11.2342	10.8486	9.98553	12.666	6.54764	2.77422	11.2863	3.27161	9.05178
											22.2019	11.324	11.027	9.76668	12.8039	6.65864	2.71251	11.364	3.28365	8.85778
											22.5927	11.1554	10.9329	9.87707	12.7257	6.62757	2.63865	11.3033	3.23873	8.90801
											22.2945	11.2449	10.9881	9.83985	12.6908	6.55966	2.77721	11.3523	3.31766	8.93497
											22.2073	11.2297	11.0377	9.79128	12.7203	6.62596	2.77912	11.4655	3.31053	8.8327
											22.1069	11.2541	11.0502	9.77169	12.565	6.62134	2.90458	11.4642	3.35324	8.90883
											22.3897	11.1884	11.1083	9.78461	12.5572	6.67132	2.7033	11.4691	3.20774	8.92032
											22.4516	11.162	11.0207	9.95177	12.6028	6.50844	2.66544	11.3501	3.22059	9.06661
											22.387	11.2509	10.8829	9.97954	12.5677	6.50933	2.77982	11.2383	3.2601	9.1444
											22.3698	11.192	10.9881	9.9594	12.8577	6.55395	2.56597	11.3523	3.21662	8.94413
											22.1385	11.3825	11.2179	9.73335	12.9172	6.59689	2.53097	11.243	3.28562	8.95409
											22.2098	11.1881	10.9703	9.86134	12.5279	6.70763	2.85154	11.434	3.28937	8.96004
											22.2581	11.24	10.9813	9.75351	12.988	6.77346	2.6354	11.2822	3.35875	8.72934
											22.037	11.2373	11.0426	9.68042	12.6651	6.84604	2.88458	11.5026	3.36843	8.73593
											22.4248	11.162	11.0961	9.76889	12.439	6.61772	2.81306	11.3941	3.30239	8.98191
											22.2284	11.2755	10.8955	9.86766	12.6573	6.68611	2.81369	11.3833	3.26031	8.93231
											22.5105	11.1522	10.9503	9.97653	12.5364	6.5008	2.72314	11.3422	3.21865	9.08929
											22.6761	11.1444	10.778	10.1143	12.4349	6.36914	2.79619	11.2383	3.21025	9.23841
											22.1836	11.3251	10.9773	9.80709	12.8514	6.638	2.71674	11.2842	3.32623	8.89035
											22.361	11.193	10.9162	9.95548	12.7079	6.62082	2.68714	11.2556	3.27425	9.02866
											22.4888	11.2169	11.064	9.763	12.7744	6.5923	2.63679	11.3786	3.25827	8.82689
											22.3048	11.3061	11.0313	9.75696	12.922	6.66098	2.61477	11.293	3.29158	8.81862
											22.4774	11.2119	10.9543	9.90826	12.6117	6.34781	2.81293	11.4341	3.27321	8.96832
											22.1559	11.3001	11.0039	9.79726	12.8109	6.61283	2.7587	11.3611	3.33559	8.86371
											22.256	11.2041	11.1149	9.62965	12.5732	6.81528	2.83059	11.4988	3.32325	8.75428
											22.8523	11.0788	10.8284	10.175	12.5501	6.38077	2.56573	11.1529	3.13895	9.27705
											22.509	11.1624	10.9341	9.95194	12.7406	6.59829	2.60857	11.3182	3.20587	8.97107
											22.3793	11.1302	10.8269	10.0154	12.5828	6.60907	2.80685	11.4039	3.24466	9.00096
											22.3445	11.2042	10.9163	9.9214	12.5375	6.66093	2.78851	11.3468	3.23961	9.04025
											22.3249	11.2415	10.9604	9.84461	12.682	6.71785	2.71169	11.2734	3.27518	8.9684
											22.4427	11.2584	10.9986	9.71096	12.5147	6.66614	2.84906	11.49	3.23196	8.83754
											21.8516	11.2454	11.1409	9.79197	12.8983	6.75411	2.69195	11.4318	3.37341	8.82054
											22.2019	11.2914	11.0788	9.71047	12.7537	6.68063	2.74644	11.2983	3.3676	8.87085
											22.0468	11.1257	10.8761	10.0807	12.7256	6.57949	2.80371	11.6628	3.21076	8.88843
											21.9192	11.2838	11.1836	9.64235	13.1465	6.89351	2.55267	11.4767	3.33778	8.56394
											22.508	11.1875	10.9918	9.84049	12.5392	6.63566	2.73272	11.3244	3.24168	8.99861
											22.0723	11.3844	10.9745	9.68476	12.6473	6.69492	2.94147	11.379	3.36995	8.85136
											22.7185	11.0901	11.0103	9.88068	12.6723	6.64856	2.54419	11.2558	3.21258	8.96698
											22.0579	11.2339	11.3167	9.71362	13.6996	6.66789	2.13998	11.3532	3.3548	8.46244
											22.0245	11.3337	11.1409	9.61408	12.8627	6.80103	2.73377	11.4699	3.33391	8.68561
											22.4612	11.1576	11.1703	9.87731	13.1998	6.47785	2.30431	11.3767	3.22164	8.75316
											22.3186	11.2027	11.0786	9.74143	13.0577	6.65019	2.56584	11.3846	3.33988	8.66042
											22.7196	11.1533	11.016	9.98758	12.8674	6.32439	2.46414	11.2027	3.22761	9.03729
											22.3509	11.2774	11.1275	9.80608	13.271	6.56859	2.33245	11.3358	3.2257	8.70459
											23.0089	11.0021	10.7024	10.0713	12.5082	6.50207	2.71573	11.3153	3.16237	9.01159
											22.4111	11.2465	10.8754	9.9941	12.7878	6.49865	2.65841	11.2289	3.25202	9.0472
											22.5281	11.1452	10.8081	9.9887	12.6327	6.53088	2.78498	11.4481	3.20851	8.92469
											22.3234	11.1904	11.1226	9.7699	12.8511	6.68188	2.58432	11.3713	3.29013	8.81493
											22.615	11.317	10.796	9.74497	12.3578	6.89952	2.86461	11.284	3.14099	8.98008
											22.1729	11.332	11.1244	9.74952	13.1264	6.57845	2.52095	11.3391	3.31093	8.74536
											22.4631	11.1754	11.0745	9.80451	12.8943	6.6809	2.51419	11.2653	3.27834	8.84955
											21.9899	11.2121	11.0695	9.77384	12.6456	6.75437	2.85505	11.5524	3.33054	8.81667
											22.4827	11.1249	11.1564	9.91453	13.1689	6.57849	2.25152	11.3824	3.1607	8.77936
											22.4829	11.2893	10.9381	9.98031	13.0446	6.43621	2.45472	11.3036	3.1494	8.92103
											22.1261	11.3178	11.0541	9.64485	12.7554	6.73995	2.83123	11.4251	3.36441	8.74103
											22.4898	11.0757	11.2327	9.91017	12.7087	6.52617	2.4569	11.4277	3.17554	8.99658
											22.4382	11.1242	11.0055	9.92839	12.4786	6.58287	2.75384	11.3098	3.2788	9.09981
											22.618	11.3113	10.8155	10.0205	12.8917	6.40238	2.55203	11.1185	3.19098	9.07899
											22.5576	11.2453	10.7316	10.1183	12.6219	6.35083	2.7623	11.2127	3.2102	9.18925
											22.5142	11.1568	10.964	10.06	12.8579	6.49375	2.4651	11.2096	3.19272	9.08588
											22.4596	11.1806	11.1989	9.79215	13.1036	6.57562	2.34947	11.3837	3.21856	8.7378
											22.0866	11.2279	11.0445	9.70292	12.7234	6.71603	2.87584	11.4251	3.43304	8.76473
											22.339	11.2929	10.8975	9.80153	12.5662	6.65663	2.87343	11.32	3.29882	8.95401
											22.3375	11.1023	11.1114	9.79497	12.5067	6.80364	2.71809	11.4177	3.26728	8.94042
											22.2585	11.3469	10.9164	9.87557	12.8347	6.54022	2.71782	11.3384	3.25099	8.92059
											22.4427	11.2307	11.064	9.82466	13.0588	6.55039	2.47013	11.2549	3.28908	8.81463
											22.0748	11.2423	10.9511	9.99339	12.6903	6.55685	2.77279	11.4359	3.25425	9.02839
											22.7197	11.0843	11.0077	10.0926	12.5379	6.35385	2.55189	11.2677	3.14916	9.23521
											22.7342	11.165	10.9501	10.0136	12.8593	6.46196	2.42557	11.2302	3.13265	9.02748
											22.0625	11.1937	11.2058	9.8001	13.0364	6.68947	2.50323	11.4057	3.32467	8.77847
											22.4241	11.2055	10.9154	9.99288	12.8972	6.47216	2.59195	11.2802	3.25513	8.96551
											22.3274	11.2517	10.9915	9.78414	12.8159	6.57781	2.73744	11.3511	3.34012	8.82285
											22.2173	11.2454	11.0667	9.8979	13.2475	6.50238	2.42906	11.338	3.29406	8.76165
											22.4186	11.241	10.9503	9.93909	12.7662	6.6002	2.59751	11.213	3.22922	9.04491
											22.3307	11.2641	10.9754	9.85078	13.003	6.65548	2.54687	11.2801	3.26406	8.82955
											21.9414	11.3025	11.0607	9.77573	12.8877	6.84612	2.67482	11.3188	3.33825	8.85396
											22.2995	11.2418	10.9651	9.9202	12.6985	6.58386	2.70285	11.2539	3.28714	9.04713
											22.5212	11.2049	10.833	10.0053	12.7882	6.47935	2.66449	11.3198	3.21287	8.97095
											22.5307	11.3038	10.843	9.83397	12.948	6.59895	2.63211	11.1567	3.29757	8.85523
											22.2172	11.2198	11.2163	9.64146	12.4322	6.86625	2.77459	11.5117	3.23344	8.88696
											22.5193	11.303	10.9241	9.94212	12.8448	6.39803	2.60128	11.3052	3.18156	8.9807
											22.368	11.1861	10.8412	10.1369	12.6858	6.45554	2.67406	11.3272	3.18086	9.14444
											21.8072	11.3752	11.0567	9.73787	13.0075	6.85568	2.68281	11.2753	3.38915	8.81265
											22.412	11.1582	10.9966	10.0221	12.8191	6.56736	2.50314	11.3011	3.18102	9.0394
											22.3428	11.2411	10.9374	9.88027	13.2655	6.63109	2.44171	11.3793	3.23268	8.64808
											22.6211	11.1371	10.8982	10.0146	12.6617	6.60058	2.57688	11.2539	3.16131	9.07468
											22.3565	11.2686	10.9722	9.87622	12.9659	6.64404	2.53342	11.2628	3.2371	8.88321
											22.4963	11.1621	11.0869	9.7911	12.9026	6.65618	2.51358	11.4067	3.22366	8.76086
											22.6698	11.3411	10.8749	9.9767	12.7925	6.38373	2.55481	11.2183	3.1085	9.07965
											22.1864	11.1878	11.0544	9.7018	12.8634	6.87278	2.68875	11.4198	3.3438	8.68107
											22.2566	11.1807	11.056	9.93863	12.9428	6.50185	2.56372	11.3712	3.28775	8.90071
											22.6954	11.1659	10.8802	10.0965	12.484	6.3365	2.68257	11.3231	3.11946	9.21641
											22.3997	11.2457	11.0809	9.77557	13.1595	6.53013	2.47583	11.4388	3.25413	8.63975
											22.3643	11.2418	10.9083	9.87799	12.7102	6.62625	2.74302	11.2774	3.29208	8.95879
											22.5636	11.2224	10.9224	9.94963	12.4446	6.42934	2.79773	11.3816	3.17915	9.1095
											22.4339	11.2572	10.8472	10.0583	12.62	6.45442	2.71151	11.2787	3.17718	9.16151
											22.5444	11.2875	10.8543	9.88791	12.7263	6.56433	2.69649	11.1798	3.25299	9.00602
											22.3965	11.1595	11.0016	9.76953	12.7105	6.70365	2.74375	11.4999	3.26966	8.74536
											22.3068	11.237	10.9446	9.90096	12.5986	6.61522	2.77575	11.3967	3.23048	8.99392
											22.143	11.2354	11.0465	9.79639	12.9733	6.72989	2.61575	11.3373	3.33942	8.78305
											22.4267	11.0733	11.0811	9.8638	12.8345	6.71545	2.52971	11.4055	3.24846	8.82158
											22.3608	11.1801	11.0409	9.80746	12.8753	6.6655	2.61088	11.2894	3.33396	8.83559
											22.4851	11.0536	10.8801	10.0875	12.5059	6.51843	2.75082	11.4108	3.21147	9.09637
											22.2277	11.1797	11.1792	9.84273	13.2168	6.62159	2.35499	11.3225	3.30159	8.75322
											22.5431	11.1012	10.9983	9.7502	12.7102	6.77073	2.68865	11.3861	3.29934	8.75217
											22.1356	11.2963	10.912	9.785	13.0763	6.73741	2.68016	11.3549	3.34856	8.67377
											22.3839	11.2464	10.9736	9.69912	12.8147	6.82965	2.68916	11.2654	3.32781	8.77026
											22.6274	11.1555	11.0707	9.84512	12.6734	6.53749	2.58766	11.4013	3.18073	8.9207
											22.2471	11.2602	11.0584	9.84443	12.6398	6.59968	2.72329	11.3066	3.28902	9.03156
											22.39	11.218	10.9016	9.99509	12.63	6.55376	2.70767	11.3018	3.21344	9.08867
											22.3966	11.2553	11.1134	9.7784	12.8868	6.60018	2.53877	11.3454	3.23861	8.84656
											22.3649	11.1498	11.1498	9.81243	12.3752	6.64342	2.77104	11.4856	3.21583	9.0319
											22.3148	11.1926	11.0125	9.84673	12.6528	6.63231	2.74395	11.4029	3.27926	8.92206
											22.3141	11.0007	10.8082	10.2388	13.4494	6.75204	2.19474	11.5432	3.05154	8.64726
											22.4294	11.2045	10.9512	10.011	12.7665	6.5438	2.5658	11.2404	3.20197	9.08544
											22.4859	11.1934	11.0608	9.93098	12.2377	6.63132	2.73402	11.3405	3.11648	9.26894
											22.0708	11.4015	11.4065	9.75698	13.1668	6.45109	2.29114	11.4185	3.16798	8.8687
											22.6893	11.3036	10.9732	9.81666	12.8234	6.53935	2.53253	11.1444	3.20628	8.97129
											22.1247	11.4197	10.9388	9.77054	13.133	6.72889	2.58748	11.1787	3.32381	8.79445
											22.4688	11.231	10.8926	10.0157	12.8341	6.34271	2.65252	11.3091	3.24626	9.00719
											22.1958	11.2816	11.1205	9.7462	13.2549	6.67599	2.42935	11.3075	3.32241	8.66583
											22.0141	11.3098	11.0185	9.7049	13.1126	6.72992	2.69343	11.3382	3.43514	8.6434
											21.9405	11.2882	11.1802	9.64515	13.3604	6.84642	2.4567	11.4119	3.37674	8.49379
											22.5608	11.2587	10.9531	9.98208	12.8743	6.43537	2.50001	11.1846	3.19237	9.05871
											22.8137	11.1322	10.862	10.0714	12.4194	6.44084	2.66334	11.2447	3.11561	9.23668
											22.5929	11.136	11.0027	9.98827	12.9363	6.41867	2.46682	11.3908	3.17275	8.89467
											22.3526	11.052	11.2997	9.74502	12.445	6.72378	2.66829	11.6971	3.16636	8.8501
											22.2262	11.2569	11.067	9.83495	12.533	6.71131	2.73474	11.3165	3.24769	9.07164
											22.6542	11.1095	10.9147	9.967	12.5683	6.56264	2.67047	11.2688	3.22302	9.06144
											22.2228	11.2461	10.9532	9.83028	12.6038	6.67841	2.84058	11.3911	3.30056	8.93309
											22.2738	11.2312	11.0885	9.84746	13.07	6.58864	2.48256	11.306	3.29311	8.81878
											22.658	11.1956	10.959	9.91952	12.8608	6.54388	2.49295	11.2758	3.16688	8.92764
											22.5352	11.2466	11.0942	9.87868	12.9579	6.45155	2.43119	11.2589	3.20476	8.94102
											22.4755	11.2102	10.9526	9.87772	12.6384	6.55593	2.72938	11.3596	3.24006	8.96062
											22.4718	11.0548	10.9218	9.88792	12.4509	6.73118	2.83643	11.4125	3.28824	8.94451
											22.7109	11.2087	10.8067	9.95802	12.805	6.53317	2.60626	11.1677	3.22422	8.97924
											22.4773	11.2092	11.0206	9.94443	12.8089	6.49016	2.54223	11.2516	3.22649	9.02911
											22.1196	11.1778	11.0544	9.96594	12.6269	6.61811	2.70856	11.4439	3.23855	9.04623
											22.2848	11.2091	11.0512	9.88474	12.8516	6.52611	2.62825	11.4465	3.25191	8.86588
											22.2803	11.1767	11.0705	9.80241	12.7895	6.59247	2.70808	11.5807	3.25928	8.74017
											22.422	11.1626	11.1746	9.79925	12.9962	6.57249	2.44966	11.4946	3.20601	8.72257
											22.7164	11.226	10.9394	9.92717	12.8915	6.5401	2.44612	11.1883	3.15416	8.9709
											22.1519	11.3034	11.1195	9.64664	13.1457	6.70028	2.58291	11.368	3.37965	8.60211
											22.3621	11.3042	10.8868	9.7738	12.6817	6.7754	2.77795	11.2898	3.26507	8.88322
											22.3654	11.3451	11.087	9.7663	13.2062	6.4923	2.44217	11.2814	3.27545	8.7387
											22.478	11.1031	10.9795	10.0015	12.7785	6.53549	2.57078	11.404	3.19627	8.95295
											22.33	11.2693	10.9553	9.74084	12.6613	6.66016	2.84281	11.3619	3.33579	8.84254
											22.3247	11.2886	11.041	9.74706	12.8448	6.6159	2.67501	11.2958	3.32567	8.84139
											22.2928	11.2213	11.0395	9.75434	12.9321	6.7548	2.6052	11.4197	3.27084	8.70934
											22.1762	11.2734	11.1562	9.71117	13.177	6.61847	2.50994	11.343	3.36811	8.66654
											22.3801	11.1796	11.0227	9.84735	12.448	6.67479	2.78905	11.3412	3.26327	9.05392
											22.2684	11.2213	11.1458	9.81307	12.4509	6.6196	2.76119	11.3656	3.26555	9.08859
											22.4949	11.2679	10.8563	9.88762	12.7161	6.66317	2.68454	11.2323	3.22077	8.9764
											22.74	11.1715	10.8365	10.0429	12.6166	6.4066	2.65331	11.2008	3.19346	9.13833
											22.2951	11.466	10.9541	9.70257	12.8437	6.55093	2.76533	11.2684	3.29684	8.85704
											22.2943	11.1732	10.9142	9.86029	12.6236	6.70127	2.82963	11.3696	3.32635	8.90767
											22.417	11.2786	10.8335	9.71579	12.6824	6.72857	2.89737	11.3657	3.33316	8.74792
											22.3995	11.2599	11.0985	9.86395	13.35	6.51804	2.27334	11.3294	3.20305	8.7043
											22.5927	11.0417	11.2065	9.91786	12.7596	6.48001	2.4384	11.4875	3.15725	8.91851
											22.2615	11.3222	10.9793	9.87194	13.0284	6.49678	2.59388	11.3013	3.28616	8.85852
											22.4801	11.1483	10.9576	10.0008	12.5403	6.5273	2.69385	11.2977	3.21922	9.13489
											21.9278	11.2097	11.0517	9.46985	12.6334	7.26345	2.96167	11.4637	3.4673	8.55142
											22.243	11.2737	11.0578	9.80123	12.4562	6.59874	2.85546	11.3913	3.2796	9.04299
											22.3053	11.3959	10.9437	9.74363	12.6483	6.56284	2.85627	11.2658	3.32119	8.95713
											21.5594	11.4607	11.0156	9.51028	12.786	6.91837	3.11211	11.4436	3.56047	8.6334
											22.5467	11.2051	10.8456	9.93848	12.6931	6.57061	2.70828	11.2113	3.26879	9.01217
											22.2558	11.0547	11.3348	9.69832	12.6033	6.71207	2.65439	11.6773	3.25735	8.75202
											22.2633	11.3557	10.994	9.84123	12.909	6.62536	2.5879	11.2547	3.23433	8.93446
											22.0217	11.2116	11.0227	9.82339	12.7923	6.75373	2.76336	11.4779	3.32628	8.80707
											22.5839	11.2152	10.845	10.1822	12.569	6.29385	2.642	11.2362	3.12277	9.30992
											22.5741	11.1943	10.9604	9.86433	12.5348	6.58726	2.73004	11.2776	3.24219	9.03495
											22.5435	11.103	11.0267	9.94245	12.4042	6.56124	2.72501	11.3695	3.20411	9.12037
											22.2025	11.2521	11.0749	9.74805	12.7639	6.68776	2.72376	11.294	3.36983	8.88321
											22.578	11.1036	10.9397	9.9764	12.4791	6.52755	2.7391	11.3306	3.23166	9.09427
											22.4947	11.2795	10.7849	10.02	12.6316	6.48466	2.74971	11.1986	3.21871	9.13755
											22.3984	11.1955	10.916	9.9076	12.5907	6.71178	2.72832	11.3763	3.19529	8.98008
											22.2666	11.1431	11.0893	9.86537	12.8105	6.69619	2.58686	11.3169	3.30733	8.91794
											22.4442	11.1751	10.959	9.96015	12.5905	6.65883	2.64638	11.2555	3.20539	9.10502
											22.732	11.1569	10.962	9.84915	12.4159	6.62688	2.72303	11.2114	3.22749	9.09522
											22.5508	11.2777	10.8209	9.99916	12.6679	6.52403	2.66977	11.1762	3.18711	9.12633
											22.5012	11.2572	10.8355	9.92408	12.708	6.63183	2.69146	11.1993	3.23442	9.01706
											22.4354	11.1949	11.2353	9.67468	12.5406	6.67574	2.66697	11.3976	3.25827	8.92061
											22.6526	11.0767	10.8249	10.0075	12.6267	6.67836	2.65078	11.3234	3.17581	8.98322
											22.1164	11.2745	10.9799	9.85685	12.8902	6.61989	2.71305	11.3467	3.33675	8.86588
											21.9397	11.3688	11.0166	9.72741	12.9574	6.87806	2.68348	11.2214	3.37562	8.83137
											22.6486	11.2547	10.7481	10.0503	12.9346	6.43754	2.56392	11.1376	3.2085	9.01609
											22.5273	11.1263	10.9501	9.87287	12.4064	6.6128	2.8403	11.4559	3.22729	8.98072
											22.5357	11.1247	10.7852	10.0401	12.7022	6.61504	2.68596	11.227	3.25374	9.03024
											22.7018	11.044	10.9282	10.1533	12.4406	6.33538	2.65739	11.3472	3.14608	9.246
											22.3524	11.0773	10.8388	9.96317	12.534	6.66613	2.88286	11.527	3.26742	8.89082
											22.3701	11.2	10.928	9.85411	12.5254	6.63451	2.85266	11.3646	3.29709	8.97356
											22.2317	11.2088	11.1954	9.73052	12.9816	6.65193	2.53675	11.4682	3.28662	8.70843
											22.2844	11.3376	10.9409	9.81921	12.7343	6.58302	2.77026	11.2348	3.32146	8.9741
											22.569	11.0442	11.0497	9.90052	12.3804	6.73447	2.68545	11.3935	3.18232	9.06049
											22.2186	11.2683	10.9244	9.73881	12.8041	6.74352	2.81936	11.3316	3.3835	8.76775
											22.0528	11.3131	10.9548	9.92637	12.8072	6.60253	2.73085	11.3702	3.27	8.9721
											22.2517	11.065	11.1467	9.79729	12.4765	6.71897	2.7996	11.6219	3.26815	8.85416
											22.8062	11.1638	10.8411	10.0636	12.998	6.4281	2.39724	11.2353	3.11702	8.94955
											22.1981	11.2423	10.9869	9.86294	12.84	6.62914	2.69481	11.3717	3.30179	8.87227
											22.0637	11.2765	11.1538	9.72699	12.7647	6.74396	2.69449	11.4397	3.29566	8.84048
											22.571	11.0841	11.047	9.94491	12.5388	6.57899	2.62177	11.3017	3.22179	9.08997
											22.7663	11.1152	10.7743	10.0331	12.543	6.57149	2.69442	11.2163	3.18744	9.09854
											22.4871	11.1282	10.966	10.0473	12.4851	6.43661	2.71811	11.3402	3.20919	9.1822
											22.7865	11.105	10.827	10.0958	12.3896	6.41511	2.72923	11.2936	3.13811	9.22001
											22.1108	11.2711	10.9699	9.85356	12.5134	6.72542	2.86594	11.3089	3.31731	9.06373
											22.4167	11.1779	10.9859	9.81584	12.5395	6.75679	2.75263	11.2808	3.28625	8.98761
											21.9738	11.3462	11.144	9.69621	12.9658	6.69067	2.67113	11.4312	3.33737	8.7436
											22.3971	11.1755	11	9.8223	12.7426	6.6319	2.70381	11.3196	3.32768	8.87962
											22.0544	11.2382	11.0379	9.84621	12.965	6.64051	2.66679	11.4022	3.34818	8.80061
											22.1935	11.2644	10.9783	9.85245	12.4912	6.7371	2.82651	11.3581	3.24972	9.04873
											22.3001	11.2138	10.9902	9.68473	12.8016	6.86662	2.7343	11.3176	3.36423	8.72683
											22.3191	11.2089	10.8974	9.8268	12.6269	6.73406	2.831	11.3768	3.30006	8.87892
											22.5746	11.199	10.7889	10.0793	12.6766	6.41906	2.69727	11.305	3.1775	9.08283
											22.2786	11.1523	10.8834	9.89754	12.7711	6.87937	2.67756	11.3008	3.27859	8.88079
											22.1248	11.3723	10.8837	9.82597	13.0564	6.63749	2.69561	11.2305	3.36326	8.80993
											22.4751	11.2071	10.9217	9.97388	12.7785	6.48891	2.62982	11.3198	3.21566	8.98941
											22.4598	11.2654	10.9199	9.97736	12.8037	6.50666	2.58545	11.1384	3.24509	9.09825
											22.2389	11.2053	10.7993	10.0233	12.661	6.64035	2.80512	11.3221	3.27155	9.03312
											22.1616	11.3966	10.9389	9.82527	12.7607	6.61594	2.76849	11.2016	3.31985	9.01104
											22.657	11.1354	10.9432	9.91488	12.7518	6.49539	2.62184	11.3509	3.22623	8.90338
											22.5783	11.2813	10.8225	9.84063	12.8504	6.68136	2.64141	11.2307	3.22188	8.85144
											22.312	11.1377	11.0281	9.98366	12.4489	6.52583	2.77555	11.5427	3.17395	9.07154
											22.2528	11.0688	10.9436	10.0035	12.6377	6.75224	2.69627	11.416	3.24496	8.98419
											22.1887	11.3119	11.0694	9.8115	12.9352	6.57521	2.61367	11.2833	3.31835	8.89276
											22.0352	11.3346	10.9777	9.71109	13.2262	6.81528	2.6056	11.3989	3.3406	8.55499
											22.3301	11.3303	10.8169	9.90868	12.7076	6.69512	2.74263	11.1909	3.24463	9.03317
											22.4446	11.262	11.0374	10.0224	13.2921	6.35091	2.26556	11.2493	3.17458	8.90113
											22.3746	11.2422	10.9482	9.75772	12.6833	6.75653	2.7655	11.3877	3.26641	8.81775
											22.4189	11.1797	10.9124	9.84235	12.6089	6.76044	2.76165	11.396	3.23494	8.88479
											22.2981	11.177	11.1857	9.77072	12.65	6.65943	2.65159	11.4325	3.26395	8.91101
											22.8823	11.1228	11.0086	10.0047	13.1214	6.28933	2.27874	11.2901	3.13727	8.8648
											22.2335	11.1972	11.0879	9.77537	13.0487	6.68372	2.55502	11.3596	3.34522	8.71369
											22.6496	11.122	10.837	10.0185	12.4672	6.5316	2.75913	11.3429	3.17877	9.09328
											21.8387	11.3046	11.3014	9.53237	13.4125	6.98164	2.39793	11.5091	3.34729	8.37435
											22.2567	11.2676	11.13	9.7735	12.7946	6.64356	2.61579	11.3681	3.25977	8.89042
											22.0244	11.3266	10.9702	9.6681	12.7793	6.79859	2.89721	11.3856	3.41548	8.73451
											22.5844	11.317	10.8136	9.8117	12.6617	6.59529	2.79587	11.1882	3.27997	8.95231
											22.3301	11.2624	10.9951	9.93452	12.832	6.48803	2.61421	11.4314	3.18054	8.9317
											22.4277	11.2133	10.9348	9.89407	12.8138	6.52486	2.6804	11.2858	3.30561	8.91952
											22.0209	11.2907	11.0741	9.73822	13.0419	6.73189	2.64514	11.3427	3.38664	8.72787
											21.9112	11.2682	11.0289	9.71405	12.6616	6.8585	2.90739	11.4288	3.40391	8.8174
											22.76	11.0948	11.0798	9.88646	13.0165	6.51227	2.34149	11.3003	3.19238	8.81603
											22.6159	11.2478	10.7845	9.92724	12.523	6.6141	2.78802	11.2179	3.20901	9.07245
											22.4482	11.354	10.7568	9.87011	12.4713	6.61999	2.92603	11.1197	3.30308	9.13068
											22.3877	11.2548	10.8893	9.92167	12.5323	6.62804	2.78794	11.2572	3.24249	9.09848
											22.5111	11.2028	11.099	9.88596	13.1487	6.4667	2.35073	11.4299	3.15796	8.74709
											22.7199	11.088	10.9641	10.0366	12.7516	6.4249	2.50676	11.3001	3.17067	9.03733
											21.9939	11.332	11.1805	9.73998	13.175	6.68805	2.48474	11.4422	3.27552	8.688
											22.2502	11.3054	10.9733	9.76045	12.7575	6.65843	2.78067	11.401	3.29294	8.82008
											22.7511	11.2479	10.9234	9.88894	13.0766	6.4571	2.42168	11.2434	3.17577	8.81407
											22.2513	11.3504	11.0288	9.84309	13.0433	6.50651	2.55258	11.1378	3.34477	8.94159
											22.1149	11.2128	11.1148	9.73944	12.7237	6.75506	2.74274	11.4489	3.33082	8.81683
											22.0615	11.3626	11.0091	9.62371	12.7188	6.86462	2.86297	11.2649	3.41327	8.81864
											22.2572	11.3332	10.987	9.77	12.9589	6.60862	2.664	11.2715	3.33487	8.81475
											22.3708	11.2344	11.08	9.84256	12.9097	6.59178	2.52383	11.4267	3.18824	8.83195
											22.4613	11.1571	10.8551	9.93026	12.5692	6.69265	2.77475	11.3226	3.247	8.99009
											22.4779	11.0545	10.9698	9.90305	12.5179	6.63485	2.7845	11.4243	3.28907	8.9441
											22.4946	11.201	10.9304	9.9885	12.782	6.4605	2.61238	11.3265	3.20476	8.99947
											22.3542	11.1683	10.9731	9.96725	12.5321	6.58563	2.73916	11.2733	3.27077	9.1361
											22.459	11.054	11.0598	9.99718	12.7521	6.52372	2.54852	11.3943	3.23046	8.9808
											22.1067	11.275	11.1745	9.59615	13.0556	6.88901	2.56611	11.3778	3.35465	8.60448
											22.1691	11.3492	11.0437	9.74439	12.7233	6.62549	2.77806	11.3037	3.3353	8.92774
											22.597	11.1855	10.9807	9.83718	12.7902	6.52705	2.63203	11.2258	3.31176	8.91278
											22.4665	11.3204	10.749	9.98388	12.87	6.46643	2.70523	11.2028	3.25306	8.98277
											22.5519	11.184	10.9341	9.86785	12.8866	6.54032	2.61641	11.2583	3.30542	8.85517
											22.5227	11.3597	10.8202	10.0687	13.2521	6.23064	2.42825	11.2352	3.16696	8.91551
											22.6218	11.1607	10.8609	9.99098	12.7334	6.63046	2.57488	11.2152	3.18447	9.02725
											22.3196	11.1545	10.8577	9.98786	12.568	6.6814	2.79281	11.3762	3.2403	9.02143
											22.1815	11.2148	11.152	9.71647	12.7469	6.72476	2.69755	11.5023	3.28821	8.77558
											22.3827	11.2035	11.0237	9.8075	12.7235	6.70365	2.66203	11.3697	3.24897	8.87475
											22.2995	11.2818	10.9818	9.85269	12.7674	6.59338	2.69461	11.3925	3.23198	8.90437
											22.1995	11.277	10.9759	9.80967	12.848	6.65252	2.72562	11.2822	3.35798	8.87163
											22.7023	11.079	11.1014	9.8876	12.6533	6.54129	2.52288	11.3607	3.18057	8.97091
											22.4602	11.2347	11.0218	9.83142	12.748	6.59425	2.62788	11.3117	3.23979	8.93016
											22.2537	11.211	10.8647	9.83966	12.5616	6.63579	2.96414	11.3887	3.37757	8.90309
											22.4596	11.0875	11.2316	9.87775	12.9317	6.57743	2.36221	11.3182	3.24127	8.91271
											21.68	11.3649	11.0831	9.71692	12.7269	6.88417	2.87162	11.4301	3.37869	8.86361
											22.494	11.2186	11.0818	9.77282	13.0252	6.65207	2.45041	11.2372	3.27581	8.79205
											21.9804	11.4012	11.105	9.74141	12.9508	6.71519	2.62953	11.5089	3.20259	8.76502
											22.4867	11.2829	10.8927	9.85988	12.7488	6.48997	2.74289	11.2863	3.27925	8.93057
											22.6403	11.2968	10.929	9.88493	12.6143	6.44803	2.68595	11.2255	3.19638	9.07882
											22.1389	11.2128	10.9301	9.96855	12.5562	6.66571	2.81379	11.384	3.25899	9.07096
											22.2019	11.1505	11.1041	9.90755	12.8627	6.6149	2.5733	11.2963	3.33358	8.95522
											22.1297	11.2467	10.9874	9.72839	12.8679	6.90806	2.70829	11.3695	3.32783	8.72629
											22.3711	11.246	10.867	9.69696	12.6258	6.86347	2.88301	11.344	3.33402	8.76869
											22.2126	11.3018	10.9415	9.82277	12.674	6.65327	2.81545	11.3413	3.3005	8.93691
											22.4212	11.2851	10.8838	9.87638	12.7893	6.59587	2.69372	11.312	3.23206	8.9105
											22.4431	11.1098	11.0165	9.89125	12.5315	6.6146	2.74286	11.4436	3.24045	8.96624
											22.4122	11.4817	10.6712	9.6997	12.6942	6.88109	2.89455	11.34	3.16598	8.75938
											22.3966	11.1402	10.9833	9.92058	12.8763	6.65686	2.56062	11.3024	3.26923	8.89381
											22.3164	11.3538	10.9585	9.78173	12.7263	6.64878	2.73722	11.2958	3.25512	8.92643
											22.2733	11.2568	11.0086	9.97018	12.7928	6.50841	2.6056	11.2574	3.24912	9.07774
											22.1835	11.2801	11.118	9.66571	13.0485	6.82369	2.54814	11.3411	3.32117	8.67003
											22.2788	11.2675	10.9552	9.87307	12.6483	6.60336	2.77277	11.356	3.26257	8.98244
											22.2718	11.352	11.0328	9.72342	13.015	6.63516	2.60677	11.2761	3.3165	8.77043
											22.2943	11.3786	11.0054	9.80715	13.0165	6.46227	2.61201	11.3133	3.2767	8.8338
											22.6198	11.1709	10.971	9.81749	12.6167	6.66509	2.67531	11.3556	3.20584	8.90224
											22.4889	11.2099	10.8499	9.83261	12.5966	6.73217	2.80392	11.3196	3.26213	8.90417
											22.8731	11.1171	10.8244	9.94112	12.5807	6.65123	2.62329	11.1457	3.19454	9.04883
											22.2753	11.2774	11.106	9.81264	12.9823	6.644	2.49172	11.2471	3.27386	8.88966
											22.1924	11.1516	11.1021	9.71551	13.132	6.87733	2.50573	11.1635	3.46571	8.69421
											22.6321	11.1202	10.9392	9.87412	12.5421	6.61858	2.73004	11.2984	3.26136	8.98393
											22.3087	11.2218	10.879	9.91021	12.7387	6.68131	2.73593	11.2793	3.29317	8.95181
											22.709	11.1752	10.6752	10.1647	12.4675	6.46747	2.7506	11.1869	3.14041	9.2629
											22.9764	11.054	10.8497	10.1179	12.6296	6.37854	2.51346	11.2167	3.11818	9.14555
											22.393	11.0868	11.051	9.86704	12.6766	6.63208	2.68787	11.398	3.30907	8.89854
											22.3162	11.2087	10.909	9.9979	12.6972	6.57878	2.69289	11.3247	3.22889	9.04576
											22.2983	11.1792	11.0494	9.86346	12.8862	6.60567	2.60219	11.4079	3.27711	8.8306
											22.3901	11.241	10.9936	9.75314	12.5659	6.75319	2.77701	11.3117	3.28091	8.93349
											22.5127	11.0926	11.1727	9.95046	13.3231	6.49736	2.1634	11.2943	3.21832	8.77504
											22.0783	11.3481	11.0599	9.78408	12.5531	6.70584	2.8133	11.4114	3.24007	9.00593
											22.0917	11.2497	11.1436	9.79865	12.9166	6.67707	2.5903	11.4147	3.28801	8.82969
											22.0176	11.267	11.1309	9.72274	13.0444	6.74586	2.6091	11.3749	3.37558	8.712
											22.7843	11.1622	10.9364	9.92146	13.0511	6.493	2.39676	11.2751	3.17133	8.80833
											22.3297	11.2114	11.0767	9.83314	13.143	6.5409	2.47765	11.2574	3.35248	8.77767
											23.0007	11.1722	10.7854	10.104	12.5726	6.2126	2.63101	11.229	3.10973	9.18271
											22.1208	11.2645	11.1732	9.71513	12.8784	6.69642	2.63142	11.4747	3.28722	8.75825
											22.4082	11.1453	10.9683	9.96842	12.4867	6.56048	2.76301	11.3656	3.23512	9.0988
											22.3278	11.2773	10.9764	9.82087	12.7906	6.52948	2.74033	11.3463	3.31159	8.87946
											22.231	11.2963	10.9666	9.84495	12.7806	6.6493	2.70986	11.26	3.30512	8.95624
											22.2632	11.2898	10.9248	9.76384	12.7459	6.79522	2.76405	11.2804	3.31429	8.85846
											22.1063	11.4171	11.2195	9.62444	12.8724	6.61091	2.6526	11.3391	3.32051	8.83706
											21.7599	11.4046	11.0633	9.69844	12.7846	6.70777	2.90976	11.4772	3.39274	8.80182
											22.3093	11.2569	10.9991	9.87555	12.9328	6.55246	2.59957	11.2937	3.29029	8.89024
											22.461	11.3322	10.8992	9.95696	12.4544	6.51349	2.76349	11.2197	3.16398	9.23568
											21.9511	11.2218	11.1955	9.65404	13.0973	6.8436	2.59338	11.4605	3.39836	8.58451
											22.7093	11.1515	10.9556	10.0044	12.9386	6.43702	2.42161	11.3226	3.13197	8.92753
											21.877	11.3169	11.1539	9.7177	13.0955	6.6737	2.64676	11.5489	3.33886	8.63074
											22.9454	11.0351	10.8263	9.92475	12.5166	6.61544	2.69267	11.2725	3.2099	8.96113
											22.4918	11.2571	10.8078	9.99086	12.8148	6.46802	2.68554	11.2289	3.25354	9.00168
											22.3335	11.2828	11.072	9.9074	13.0428	6.49318	2.4448	11.3377	3.19217	8.89361
											22.5473	11.3183	10.8286	9.84078	12.6387	6.55655	2.79994	11.2223	3.26326	8.98419
											22.022	11.3126	11.0027	9.76828	12.9694	6.61535	2.76919	11.3174	3.44	8.78309
											22.4534	11.1005	10.8723	9.94227	12.6156	6.72234	2.73916	11.3067	3.28001	8.96773
											22.3746	11.1319	11.1894	9.77575	12.7668	6.62246	2.58673	11.4631	3.26747	8.82174
											22.0607	11.21	11.2282	9.68879	13.2211	6.71802	2.47863	11.3314	3.43216	8.63095
											22.9128	11.0371	11.052	9.93588	12.4314	6.47615	2.58369	11.4103	3.10179	9.05898
											22.4121	11.1665	11.0726	9.84827	13.0602	6.57879	2.47016	11.382	3.26262	8.74671
											22.1693	11.2947	11.0515	9.64693	12.8335	6.7046	2.80041	11.3218	3.4346	8.74256
											22.5607	11.2792	10.9269	9.85489	12.9081	6.5297	2.57913	11.256	3.22934	8.8761
											22.5453	11.1158	10.9471	9.8468	12.6932	6.69402	2.68146	11.3447	3.27127	8.86038
											22.042	11.2226	11.0947	9.81289	12.8581	6.71097	2.67552	11.4645	3.30857	8.81016
											22.3742	11.2421	10.9632	9.92518	12.6061	6.54818	2.72691	11.3361	3.22162	9.05645
											22.5119	11.2367	10.945	9.87994	12.6225	6.53481	2.72216	11.3324	3.22125	8.99325
											22.295	11.2355	10.9515	9.83725	12.5639	6.62873	2.84915	11.3108	3.33419	8.99397
											22.5561	11.1949	10.806	9.98345	12.5524	6.59948	2.75977	11.3326	3.17435	9.041
											22.2387	11.2187	10.9883	9.90921	12.7657	6.6235	2.67908	11.3671	3.26353	8.94614
											22.3933	11.2705	10.9873	9.8778	12.927	6.53556	2.57152	11.2242	3.28156	8.93123
											22.4673	11.2559	10.901	9.85432	12.8735	6.62075	2.6361	11.2021	3.29499	8.89414
											22.5615	11.2126	11.0233	9.97407	12.9096	6.43919	2.44139	11.165	3.2185	9.05478
											22.2851	11.279	10.9369	9.8681	12.6902	6.59496	2.77056	11.3136	3.28758	8.97401
											22.0424	11.0963	11.3401	9.8649	12.758	6.58669	2.5532	11.6458	3.23161	8.88112
											22.285	11.3041	10.9119	9.79986	12.754	6.7352	2.74856	11.2208	3.32004	8.92054
											22.5801	11.2604	10.8848	9.90785	12.4813	6.46978	2.8109	11.2646	3.23166	9.1086
											22.5223	11.0315	10.9997	10.0324	12.8341	6.52989	2.5088	11.3839	3.21788	8.9395
											22.1318	11.0712	10.9784	9.73954	12.3127	7.17495	2.93729	11.3961	3.3488	8.90923
											22.4276	11.2153	10.8482	10.0181	12.7423	6.53848	2.67269	11.227	3.24615	9.06407
											22.7608	11.1949	10.8047	10.1267	12.6315	6.33933	2.60552	11.1992	3.12593	9.21141
											22.4659	11.261	11.0532	9.74601	12.6477	6.55876	2.73362	11.307	3.30087	8.92597
											23.0505	11.3293	10.6874	9.81092	12.718	6.42379	2.74132	11.1726	3.19273	8.87339
											22.4063	11.2024	11.1068	9.68915	12.6255	6.62935	2.77176	11.5825	3.24563	8.7406
											22.698	11.1144	10.8742	10.0831	12.5367	6.49183	2.62221	11.1809	3.17988	9.21869
											22.1304	11.2301	11.0863	9.78394	12.6368	6.72143	2.7701	11.3771	3.32825	8.93567
											22.2745	11.1884	11.0867	9.89859	12.6945	6.60477	2.63439	11.3861	3.23681	8.99533
											22.33	11.244	10.9832	9.95022	12.7067	6.6143	2.61932	11.2989	3.1925	9.06092
											22.2895	11.2377	11.3083	9.81819	13.2464	6.44483	2.26432	11.4102	3.21736	8.76324
											22.3571	11.1939	10.9869	9.91708	12.7644	6.59938	2.63822	11.3516	3.24183	8.94959
											22.4432	11.3067	10.8298	9.91715	12.631	6.55042	2.78736	11.2622	3.23317	9.03908
											22.4935	11.3531	11.0854	9.81761	13.0898	6.44162	2.4084	11.17	3.23397	8.90662
											22.6392	11.1838	10.8287	10.0074	12.5567	6.59244	2.67735	11.1967	3.18002	9.1377
											22.4158	11.2396	11.1143	9.87963	12.9434	6.51916	2.44668	11.2065	3.25232	8.98272
											22.7389	11.3224	10.8226	9.82061	12.3623	6.50111	2.8947	11.2146	3.21831	9.10445
											22.269	11.2185	11.0705	9.84711	12.8257	6.57346	2.63885	11.4452	3.25494	8.85661
											22.1556	11.237	11.0516	9.82773	12.9702	6.62368	2.6277	11.3607	3.33896	8.80685
											22.0656	11.2981	11.3173	9.78458	13.0626	6.56673	2.40188	11.5571	3.16431	8.78175
											22.2134	11.245	11.1353	9.64728	12.6776	6.80126	2.74864	11.2944	3.38523	8.85192
											22.2046	11.3262	10.9513	9.81562	12.8274	6.67108	2.71832	11.2732	3.30787	8.90431
											22.3487	11.2459	11.0401	9.83143	13.1839	6.5604	2.45916	11.2854	3.30519	8.73983
											22.5424	11.1397	10.9721	9.9251	12.5851	6.62029	2.6587	11.1847	3.27492	9.0969
											22.2058	11.3384	11.0264	9.75822	12.6935	6.72697	2.73271	11.2508	3.29829	8.969
											22.6325	11.0527	10.8924	9.97068	12.4288	6.6832	2.73807	11.3407	3.20195	9.05897
											22.1633	11.3457	10.9278	9.86978	12.8893	6.52647	2.74	11.4025	3.27469	8.86048
											22.8107	11.0157	10.8526	10.0674	12.5306	6.59167	2.60537	11.3081	3.13509	9.08268
											22.3841	11.2116	11.1188	9.80005	12.9547	6.61912	2.49616	11.4032	3.22595	8.78637
											22.3052	11.1624	11.0402	9.79902	12.7309	6.70908	2.70738	11.3888	3.31711	8.83989
											22.1808	11.293	10.9722	9.82828	12.7147	6.71129	2.74955	11.2935	3.30024	8.95642
											23.0671	10.9465	10.8726	10.1524	12.2264	6.5234	2.59298	11.2214	3.05888	9.3384
											22.2328	11.161	11.0646	9.79968	12.8867	6.76209	2.61381	11.3754	3.32189	8.78195
											22.2208	11.3415	10.991	9.82646	13.1416	6.51997	2.57031	11.3957	3.26784	8.72475
											22.4305	11.2676	10.8482	9.86591	12.7368	6.57537	2.78022	11.3064	3.28555	8.90336
											22.4939	11.1601	11.0251	9.92839	12.8718	6.52042	2.52328	11.2573	3.26258	8.95718
											22.4228	11.1959	10.853	9.92854	12.4386	6.66055	2.85957	11.2838	3.2653	9.09189
											22.2283	11.2066	11.1607	9.68272	12.6725	6.65179	2.77707	11.5452	3.31743	8.7576
											22.7786	11.0135	10.9731	9.99249	12.628	6.66263	2.49247	11.3611	3.10557	8.99243
											22.1997	11.3071	11.0154	9.74098	12.5429	6.65271	2.8923	11.4183	3.30868	8.92186
											22.5633	11.173	10.8704	10.0195	12.605	6.54458	2.66749	11.2041	3.21641	9.13631
											22.7873	11.0389	11.1391	9.87387	13.0245	6.47998	2.32166	11.3868	3.1905	8.75744
											22.0519	11.3211	11.1126	9.7576	12.9981	6.70265	2.59205	11.3893	3.29247	8.78207
											22.7817	10.9592	10.893	10.0893	12.5186	6.53888	2.61901	11.3329	3.17841	9.08902
											22.7368	11.1061	10.903	9.83032	12.4504	6.69005	2.77463	11.3811	3.20736	8.92024
											22.349	11.2937	10.8865	9.83867	12.7168	6.64138	2.77484	11.3275	3.26594	8.90565
											22.2974	11.3523	10.8664	9.87053	12.9044	6.56671	2.70201	11.2834	3.26948	8.88736
											22.4227	11.2912	10.9815	9.80258	13.0805	6.63189	2.50324	11.2551	3.2608	8.77036
											22.2349	11.2566	11.1517	9.74727	12.9971	6.61189	2.55062	11.4937	3.24985	8.70637
											22.3899	11.2665	11.0522	9.88107	12.7948	6.50237	2.58958	11.2758	3.24148	9.00622
											22.3732	11.0447	11.1681	9.87256	12.6178	6.62154	2.63039	11.591	3.20555	8.87516
											22.444	11.122	11.0596	9.88591	12.7579	6.60346	2.59034	11.362	3.257	8.91783
											22.428	11.2642	10.9557	10.0078	12.3157	6.46052	2.80176	11.2849	3.1628	9.31864
											22.3388	11.2905	11.029	9.85478	12.5233	6.49871	2.79046	11.3513	3.2455	9.07768
											22.1801	11.245	11.0837	9.728	12.7036	6.73168	2.7588	11.3598	3.34937	8.86
											22.4824	11.1632	10.9793	9.87248	12.4661	6.59394	2.79569	11.4051	3.23381	9.00798
											22.5541	11.1837	10.9191	9.77985	12.5776	6.69038	2.79824	11.2786	3.31531	8.90326
											22.3904	11.2743	10.9754	9.81925	12.4415	6.77979	2.76269	11.2829	3.19196	9.0819
											22.1746	11.2435	11.0639	9.72403	12.7846	6.67509	2.77291	11.3943	3.37813	8.78877
											22.2583	11.2121	10.8785	9.91252	12.7166	6.65378	2.78819	11.4309	3.26433	8.88493
											22.5457	11.0828	11.0868	9.92424	13.0457	6.61849	2.34272	11.3545	3.19021	8.80882
											21.9559	11.1827	11.0642	9.79307	12.6279	6.77717	2.87085	11.449	3.40091	8.87832
											22.7279	11.1921	10.8348	10.0396	12.6995	6.46594	2.58297	11.126	3.19055	9.14069
											22.3622	11.2886	10.9462	9.92078	12.6443	6.52132	2.72489	11.2718	3.24014	9.07969
											22.3412	11.222	10.9609	9.79222	12.6949	6.71367	2.76133	11.2089	3.37362	8.93129
											22.4657	11.1843	11.0364	9.79956	12.7442	6.68451	2.62379	11.3374	3.25345	8.87063
											22.289	11.2351	11.1099	9.77113	13.1061	6.66244	2.47286	11.3707	3.27786	8.70498
											22.2882	11.23	11.0967	9.76732	12.716	6.6916	2.67321	11.3301	3.29931	8.90766
											22.3691	11.1254	11.0648	9.86806	12.5204	6.68006	2.71966	11.3346	3.2819	9.03599
											22.1766	11.1635	11.1727	9.7469	12.9651	6.88743	2.48442	11.354	3.29409	8.75527
											22.5032	11.2823	10.8693	9.96276	12.6234	6.48734	2.72032	11.1273	3.26188	9.16221
											22.392	11.1915	11.0699	9.87873	12.6406	6.57757	2.65061	11.3091	3.2551	9.03486
											22.3012	11.2553	11.0343	9.8842	12.614	6.52304	2.73431	11.3283	3.26715	9.05816
											22.7576	11.1056	11.0018	9.91762	12.8052	6.4769	2.50784	11.446	3.13553	8.84602
											22.2776	11.1506	11.1024	9.85018	12.7308	6.71272	2.61102	11.4294	3.23797	8.8973
											22.467	11.1824	10.892	10.0247	12.6844	6.56875	2.63186	11.2471	3.2051	9.09678
											22.3994	11.1926	11.0637	9.85245	12.9762	6.51229	2.54367	11.2954	3.31897	8.84538
											22.5143	11.1114	10.9681	9.87056	12.6169	6.63163	2.72396	11.4566	3.23253	8.87397
											22.2776	11.1137	11.0747	9.90334	12.621	6.67002	2.68082	11.4784	3.2328	8.94757
											21.8362	10.9682	11.183	9.73833	13.1939	7.07487	2.54225	11.5159	3.4885	8.45887
											22.4076	11.2064	10.9304	9.97448	13.0511	6.53417	2.49537	11.2497	3.25808	8.89276
											22.2869	11.204	10.972	9.79177	12.8102	6.75115	2.70993	11.3585	3.32071	8.79474
											22.399	11.2381	10.8926	9.89088	12.5877	6.56398	2.822	11.3736	3.2559	8.97635
											22.3233	11.1028	11.0134	9.90065	12.5574	6.7726	2.7088	11.219	3.33263	9.06939
											21.9565	11.2642	11.0103	9.83251	12.8032	6.78254	2.75393	11.4827	3.28666	8.82747
											22.2585	11.266	11.0249	9.7795	12.9521	6.68499	2.61525	11.3035	3.31837	8.79676
											22.2581	11.204	11.2036	9.79204	12.9796	6.65777	2.45457	11.3415	3.27279	8.83604
											22.5879	11.1076	10.9187	10.0219	12.6571	6.57782	2.59388	11.2462	3.20505	9.08387
											22.2857	11.2874	10.9953	9.69506	12.9203	6.65593	2.73481	11.2487	3.42482	8.75203
											22.1068	11.3277	11.1041	9.7112	12.8166	6.74528	2.68644	11.4147	3.27578	8.81136
											22.2511	11.3247	11.1421	9.7564	13.2511	6.58671	2.39494	11.3029	3.27749	8.71248
											22.7611	11.1351	11.0536	9.9033	13.0552	6.4694	2.3321	11.2344	3.20232	8.8533
											22.5206	11.0712	11.0657	9.92051	12.5716	6.52327	2.67058	11.4939	3.20679	8.956
											22.4884	11.1614	10.9336	9.96899	12.5918	6.53517	2.70848	11.3443	3.219	9.0488
											22.5175	11.1409	10.9577	9.80489	12.3901	6.67234	2.87662	11.2905	3.33436	9.01508
											22.3913	11.1587	11.0467	9.9259	12.7207	6.57793	2.60275	11.3835	3.21544	8.9771
											22.1845	11.2637	10.9761	9.77427	12.6865	6.70305	2.83119	11.3442	3.35865	8.8778
											22.1596	11.35	10.9714	9.79048	12.7024	6.61594	2.82422	11.3389	3.31684	8.93023
											22.4275	11.2302	10.9257	9.76895	12.5463	6.7059	2.8503	11.2749	3.33411	8.93619
											22.4174	11.2773	10.9686	9.78005	12.8955	6.7117	2.60008	11.289	3.24958	8.81066
											22.3613	11.1145	11.1078	9.82237	12.6532	6.66606	2.67097	11.4278	3.28089	8.89523
											22.186	11.3069	10.9966	9.79927	12.8282	6.76951	2.65899	11.3344	3.2507	8.86949
											21.7626	11.3814	10.9699	9.67941	12.9376	6.83866	2.89083	11.4697	3.41912	8.65077
											21.9659	11.2504	11.0756	9.7576	12.8995	6.77698	2.72039	11.3841	3.39094	8.77852
											21.7768	11.4606	10.9582	9.76263	12.7493	6.74705	2.91183	11.3761	3.34705	8.9104
											22.3019	11.3192	10.8824	9.73351	12.7472	6.74474	2.82751	11.2703	3.34779	8.82545
											22.2092	11.2429	11.1058	9.78871	12.8472	6.58562	2.66294	11.2996	3.3684	8.88959
											22.4991	11.1779	10.938	9.87227	12.5655	6.62054	2.75756	11.3127	3.26392	8.9925
											22.2948	11.2425	11.0632	9.62362	12.5313	6.79901	2.87915	11.4327	3.33913	8.79453
											22.4536	11.2936	10.9455	9.92776	12.5322	6.48656	2.74344	11.3439	3.16316	9.11038
											22.6271	11.1668	10.9584	9.99001	12.9792	6.43821	2.44604	11.1903	3.2359	8.96813
											22.3692	11.2181	11.113	9.82286	12.9604	6.60812	2.486	11.3933	3.21689	8.81219
											22.0917	11.264	11.07	9.63621	12.6677	6.89354	2.83456	11.3914	3.37621	8.77466
											22.3187	11.3762	10.9533	9.85628	12.8631	6.50295	2.65982	11.2372	3.26122	8.97121
											22.3495	11.1558	11.0699	9.96187	12.5726	6.57364	2.64238	11.4175	3.17689	9.07985
											22.2105	11.2504	10.9625	9.86351	12.865	6.65708	2.68287	11.3878	3.27724	8.84313
											22.1872	11.1255	11.2194	9.91688	12.9118	6.60173	2.45063	11.4502	3.22828	8.90841
											22.2415	11.2547	10.9574	9.73987	12.6961	6.75305	2.82995	11.3523	3.3532	8.82196
											22.2298	11.2848	11.0733	9.79057	12.7772	6.62652	2.67693	11.3957	3.26158	8.88364
											22.539	11.1833	10.8815	9.90048	12.654	6.69536	2.68173	11.3054	3.20523	8.95402
											23.0318	11.1415	10.9712	9.87583	12.6649	6.54148	2.46328	11.1182	3.15135	9.04033
											22.4078	11.1286	10.9245	10.0088	12.823	6.51619	2.6286	11.4103	3.23316	8.91904
											22.3682	11.2304	11.1487	9.89048	12.7497	6.4613	2.55625	11.3924	3.19415	9.00835
											22.404	11.2074	10.9304	9.89626	12.6588	6.65886	2.7082	11.3648	3.21671	8.95468
											22.3516	11.311	10.9461	9.7556	12.8558	6.73254	2.67265	11.282	3.27637	8.81636
											22.7972	11.1496	10.7676	10.2352	12.55	6.20779	2.64435	11.2541	3.10066	9.29351
											22.5293	11.2356	10.9768	9.80489	13.1659	6.53802	2.48399	11.3884	3.24316	8.63401
											22.4723	11.2858	11.0175	9.84817	12.7866	6.52342	2.60039	11.2765	3.22136	8.96794
											22.1641	11.2648	10.9604	9.84201	12.7715	6.68988	2.75275	11.3477	3.312	8.89495
											22.3372	11.3246	10.8834	10.0063	12.9408	6.54728	2.53544	11.102	3.23464	9.08837
											22.5127	11.1265	10.9354	9.9124	12.7556	6.5409	2.68435	11.3717	3.28068	8.87983
											22.1961	10.9774	11.1138	9.9854	12.4758	6.63145	2.76076	11.5651	3.28408	9.01007
											22.0184	11.2373	11.1586	9.76598	12.6839	6.69085	2.76016	11.5107	3.30775	8.86631
											22.4169	11.1191	10.8845	10.0375	12.4841	6.7001	2.71804	11.2318	3.22682	9.18128
											22.6115	11.1059	11.0772	9.87108	12.5743	6.44378	2.68347	11.4176	3.24751	8.9677
											21.9817	11.2987	11.0526	9.79277	12.791	6.67618	2.78098	11.523	3.2921	8.81099
											22.1766	11.2584	11.1456	9.60145	13.1365	6.74165	2.59597	11.3826	3.41668	8.54449
											22.4543	11.1722	11.0745	9.81758	12.9681	6.5794	2.52052	11.4104	3.25072	8.75233
											22.1437	11.0664	11.3014	10.0797	12.609	6.45428	2.48253	11.4103	3.1992	9.25351
											21.8504	11.3922	11.1015	9.69133	12.8651	6.72147	2.7922	11.4328	3.36283	8.79013
											22.3076	11.1868	11.0484	9.8694	12.77	6.55304	2.67353	11.2909	3.34391	8.95639
											22.3034	11.2695	10.9101	9.76516	12.6463	6.69153	2.86961	11.3561	3.33473	8.85362
											21.991	11.2625	11.1115	9.70864	13.0229	6.74932	2.66695	11.4049	3.40072	8.68168
											22.4459	11.2557	10.9302	9.94118	12.9982	6.57401	2.49149	11.2627	3.19686	8.9037
											22.6321	11.1686	10.9542	9.87019	12.6026	6.56169	2.69303	11.3315	3.22113	8.96503
											22.2259	11.2572	11.0536	9.81436	12.8728	6.56067	2.67387	11.5211	3.24743	8.77302
											22.3676	11.2435	10.8114	9.87205	12.5389	6.70306	2.8902	11.3822	3.25246	8.93871
											22.1797	11.2147	11.0796	9.75946	12.4524	6.75093	2.86169	11.4518	3.29516	8.95464
											22.4168	11.2644	10.8969	9.90686	12.8089	6.61111	2.64586	11.2726	3.23008	8.94641
											22.4361	11.2652	11.1139	9.85331	12.9321	6.48092	2.47543	11.3346	3.19886	8.90946
											22.4317	11.2609	10.9897	9.92453	12.4711	6.47256	2.76773	11.4999	3.1175	9.06444
											22.38	11.4409	10.8684	9.71015	12.7455	6.63409	2.82134	11.2775	3.26913	8.85294
											22.6086	11.2384	10.9062	9.87561	12.6416	6.51229	2.71773	11.2875	3.22874	8.98326
											22.3024	11.2404	10.9506	9.97261	12.5436	6.52889	2.76932	11.3	3.24612	9.14617
											22.2266	11.2235	11.0843	9.82073	13.317	6.62236	2.39996	11.2924	3.34299	8.6702
											22.3371	11.1643	11.005	9.8982	12.9316	6.62636	2.56722	11.3706	3.26762	8.83207
											22.7103	11.1287	10.9757	9.96915	13.0177	6.51189	2.37102	11.2252	3.19055	8.89982
											22.5978	11.1221	10.877	10.1209	12.8285	6.51524	2.46996	11.2352	3.14391	9.08929
											22.9081	11.1778	10.7146	10.1399	12.412	6.39073	2.70086	11.108	3.12103	9.32691
											22.4265	11.5211	11.2684	9.78425	12.6876	6.40499	2.42705	11.0553	3.11684	9.30793
											21.5793	11.3138	11.4587	9.43804	13.31	6.94191	2.53023	11.5245	3.49576	8.40769
											22.4026	11.2235	11.1158	9.77789	13.0249	6.62549	2.46807	11.2894	3.28159	8.79079
											22.3563	11.1958	10.9907	9.88804	12.8683	6.66018	2.58144	11.2922	3.26673	8.9003
											22.2541	11.2237	10.9318	9.82078	12.7647	6.77983	2.73575	11.3214	3.31191	8.85611
											21.9097	11.1742	11.148	9.91091	12.7386	6.71014	2.67496	11.4766	3.29258	8.96435
											22.5371	11.097	10.8886	10.0153	12.3326	6.6639	2.78106	11.2942	3.19568	9.19457
											22.3511	11.1131	11.1149	9.86332	12.9131	6.64217	2.5117	11.4032	3.26773	8.81964
											22.6144	11.0966	11.0388	9.85349	12.5595	6.58855	2.67853	11.3658	3.24611	8.95828
											22.5746	11.2104	11.0042	9.78307	12.8643	6.60184	2.58716	11.2808	3.27586	8.8178
											21.8364	11.3376	11.0727	9.60715	12.9303	6.94429	2.79571	11.4456	3.40515	8.62516
											22.3711	11.2551	11.0996	9.89058	13.3613	6.46885	2.28169	11.2653	3.25195	8.75449
											22.656	11.1139	10.973	10.0124	12.749	6.49973	2.50491	11.2367	3.19071	9.06355
											22.3141	11.442	10.9717	9.69344	12.6731	6.66604	2.78757	11.2206	3.27844	8.95306
											22.4404	11.1381	11.0132	9.91882	12.7223	6.58329	2.62524	11.4715	3.18866	8.89844
											22.4955	11.0151	10.7836	10.1613	12.3779	6.7103	2.75634	11.3949	3.13228	9.17286
											22.6174	11.142	11.0554	9.85505	12.619	6.36631	2.71777	11.4878	3.23973	8.89955
											22.3969	11.1903	10.8841	9.83424	12.6222	6.74145	2.80657	11.2706	3.32893	8.92467
											22.2649	11.333	10.8934	9.89928	12.6426	6.51062	2.83168	11.3846	3.24093	8.99884
											22.4983	11.2673	10.8632	9.96324	12.7148	6.45827	2.70392	11.346	3.18643	8.99853
											22.2989	11.282	10.9776	9.76607	12.7522	6.66062	2.75893	11.3038	3.3313	8.86858
											22.5664	11.1777	11.0647	9.85544	13.0145	6.59711	2.40191	11.294	3.20536	8.82292
											22.58	11.1861	10.8697	10.0896	12.791	6.3208	2.60129	11.2142	3.23163	9.11571
											22.6871	11.1693	11.0062	9.88193	13.128	6.53034	2.354	11.2664	3.20349	8.77315
											22.2209	11.2168	11.0427	9.92257	12.7518	6.59255	2.64358	11.4952	3.18428	8.92959
											22.2079	11.3008	10.9763	9.87732	12.7203	6.58221	2.74116	11.4173	3.2305	8.94632
											23.2137	11.0047	10.7469	10.086	12.3749	6.4685	2.63593	11.1823	3.10374	9.18321
											21.9145	11.3242	11.0878	9.79526	13.171	6.74453	2.53974	11.4132	3.30024	8.70944
											22.368	11.2866	10.9197	9.95595	12.7657	6.54422	2.64199	11.172	3.25515	9.0907
											22.1002	11.082	11.1035	10.2526	12.6496	6.36634	2.54491	11.4621	3.14935	9.2894
											22.2121	11.2591	10.9176	9.92381	12.5351	6.54069	2.88456	11.4285	3.26733	9.03126
											22.6031	11.1751	11.0023	9.85886	12.6305	6.56086	2.6539	11.432	3.16673	8.91666
											21.9301	11.3489	11.1633	9.53296	12.9999	6.91605	2.70693	11.2742	3.4766	8.65123
											22.2561	11.1812	10.918	9.86024	12.559	6.82177	2.81293	11.3392	3.29089	8.96062
											22.4489	11.1478	11.0541	9.78137	12.5943	6.54585	2.79618	11.4482	3.32209	8.86121
											22.5548	11.1576	10.8079	9.85856	12.5523	6.6881	2.85695	11.3032	3.30662	8.914
											22.1339	11.3578	10.9585	9.87277	12.9097	6.58026	2.67787	11.3027	3.28174	8.92476
											22.654	11.0713	11.0576	10.0161	12.6149	6.48764	2.51236	11.3801	3.12291	9.0831
											22.302	11.2419	10.9497	9.94932	12.7378	6.54187	2.68905	11.4088	3.20735	8.97223
											22.1389	11.3531	11.0152	9.80917	12.7773	6.635	2.72347	11.173	3.35676	9.01809
											22.4406	11.0532	11.1052	9.84717	12.5606	6.73448	2.65319	11.4831	3.21799	8.90454
											22.2259	11.1838	11.0398	9.73843	12.6424	6.83978	2.77602	11.4738	3.28805	8.79199
											22.2802	11.3156	10.8701	9.83473	12.9578	6.73275	2.65179	11.1666	3.32438	8.86608
											22.0672	11.1686	10.9676	9.84872	12.5359	6.80532	2.89589	11.5614	3.28232	8.86707
											22.7389	11.1779	10.9417	10.0322	12.8802	6.43827	2.4083	11.2076	3.12663	9.04828
											22.5195	11.233	10.7796	9.96429	12.5677	6.58336	2.80406	11.2517	3.23549	9.0613
											22.3381	11.237	10.7739	9.8925	12.6845	6.63079	2.88883	11.5459	3.22653	8.78181
											22.2583	11.3067	10.9534	9.86111	12.7601	6.59562	2.72482	11.3151	3.27078	8.95388
											22.3656	11.2493	10.8558	10.0215	12.7902	6.5169	2.66162	11.2884	3.21558	9.03516
											22.1836	11.2621	11.0491	9.82401	12.5902	6.74925	2.7343	11.4033	3.2215	8.98265
											22.5878	11.1733	10.9662	10.0022	12.7919	6.46575	2.52233	11.2921	3.16874	9.0297
											22.5054	11.1571	10.9481	9.87915	12.9008	6.60582	2.58841	11.3086	3.28005	8.82661
											22.4107	11.2417	10.9495	9.79285	12.6308	6.6172	2.80745	11.3592	3.29732	8.89337
											22.5764	11.2388	10.9523	9.81803	12.6401	6.65024	2.67705	11.2684	3.2192	8.95957
											21.8751	11.2888	11.3925	9.61375	13.057	6.83848	2.46366	11.4944	3.29667	8.67957
											22.4377	11.2347	10.8439	9.92874	12.5312	6.61628	2.81691	11.2637	3.25519	9.07159
											22.6782	11.1852	10.8557	9.95931	12.9081	6.63438	2.48169	11.281	3.13034	8.88614
											22.8867	11.1536	10.8391	9.97938	12.5085	6.55572	2.62861	11.1869	3.13217	9.12934
											23.5978	11.1826	10.2693	10.0732	12.7734	6.35135	2.7052	11.163	3.05437	8.82972
											22.4511	11.1133	10.9084	10.0284	12.6018	6.52992	2.71459	11.4242	3.20115	9.02714
											22.538	11.1152	10.8964	9.88223	12.5984	6.67081	2.76004	11.3991	3.25007	8.88976
											22.1122	11.3366	10.9439	9.94082	12.7486	6.49849	2.76767	11.3637	3.2638	9.02431
											22.5567	11.1906	10.8724	9.88878	12.707	6.57236	2.72552	11.1581	3.34069	8.98786
											22.5005	11.1795	10.9627	9.83874	12.852	6.59181	2.63664	11.3208	3.29384	8.82339
											22.1916	11.3116	10.9233	9.85077	12.7795	6.66428	2.75281	11.3088	3.29386	8.9234
											22.4239	11.1868	10.8965	10.0457	12.8598	6.55829	2.54377	11.2262	3.215	9.04408
											22.2388	11.263	11.0776	9.70911	13.0979	6.78299	2.52122	11.2354	3.36016	8.71389
											22.5793	11.0399	11.2638	9.89447	12.4067	6.54186	2.55754	11.5584	3.09342	9.0645
											22.5416	11.304	10.9728	9.8362	12.8274	6.53786	2.58532	11.26	3.20373	8.93103
											22.5456	11.1702	11.0061	9.80737	12.7994	6.60555	2.62677	11.3647	3.26145	8.81293
											22.492	11.144	11.0376	9.99497	13.0408	6.52292	2.36699	11.2681	3.20067	8.93192
											22.2842	11.1453	11.0226	9.92498	12.5023	6.62923	2.772	11.5344	3.19468	8.9903
											22.2878	11.3853	10.9888	9.66064	13.1415	6.64092	2.62266	11.2363	3.37718	8.65883
											22.5128	11.1279	11.0706	9.82995	12.6188	6.64423	2.64728	11.4539	3.20118	8.89333
											22.2944	11.2255	10.9828	9.94849	12.6637	6.51427	2.71961	11.3454	3.25724	9.04857
											22.043	11.1107	11.126	9.86828	12.9593	6.70918	2.59431	11.4803	3.34182	8.76713
											22.2416	11.1718	11.0034	9.7068	12.4752	6.90347	2.8935	11.4131	3.34045	8.85071
											22.3056	11.1493	10.9892	9.97967	12.5226	6.56315	2.76057	11.4458	3.2186	9.06551
											22.6079	11.1048	11.006	9.85984	12.5292	6.66521	2.68058	11.266	3.26343	9.01703
											22.286	11.2221	11.0538	9.83806	12.6779	6.62606	2.70292	11.4914	3.21138	8.89032
											22.1832	11.2594	11.0648	9.79469	12.9859	6.59384	2.62899	11.455	3.29666	8.73746
											22.3675	11.34	10.8155	9.92354	12.8005	6.5139	2.74986	11.1962	3.28942	9.00349
											22.4156	11.1864	10.9481	9.86405	12.9687	6.66869	2.56823	11.2945	3.28549	8.80029
											21.8675	11.2428	11.2188	9.57712	13.4336	6.85569	2.50411	11.406	3.50623	8.3882
											22.3531	11.1496	11.0872	9.81479	12.6272	6.73919	2.66328	11.3657	3.26307	8.93693
											22.2813	11.1437	11.0233	9.61818	12.6803	7.04705	2.78206	11.5156	3.30428	8.60427
											22.2865	11.2902	10.9776	9.86708	13.0763	6.6718	2.49366	11.2281	3.26081	8.84803
											22.0634	11.3153	11.059	9.65581	13.0619	6.85178	2.63917	11.3122	3.3854	8.65598
											22.852	11.1533	10.8957	10.0192	12.8423	6.3697	2.4759	11.2462	3.1451	9.00063
											22.3108	11.3489	11.0247	9.83649	13.2015	6.48886	2.46379	11.3314	3.23652	8.75703
											22.4727	11.2014	11.0352	9.82485	12.6063	6.58542	2.70704	11.3355	3.25955	8.97211
											22.3717	11.2077	10.9023	9.97685	12.615	6.51989	2.76411	11.4258	3.20532	9.01133
											22.6788	11.2105	10.783	9.903	12.5318	6.78272	2.71191	11.078	3.22491	9.09544
											22.0927	11.3357	11.1231	9.70436	13.0348	6.65248	2.61424	11.5036	3.27335	8.66556
											22.6486	11.1232	10.9125	10.1636	12.8506	6.33403	2.4455	11.2494	3.1409	9.13173
											22.2169	11.2032	10.9133	9.94929	12.7636	6.69575	2.69769	11.3153	3.27717	8.96776
											22.093	11.2534	11.1114	9.63395	13.0689	6.91341	2.59042	11.4123	3.34764	8.57565
											22.5972	11.0977	10.8903	10.0975	12.4901	6.47221	2.6832	11.2795	3.1847	9.20766
											22.4234	11.163	11.0602	9.94633	12.6671	6.5053	2.61443	11.5086	3.14158	8.97017
											22.3841	11.357	10.9101	9.80816	12.5607	6.60107	2.83025	11.2965	3.23858	9.01355
											22.5691	11.0926	10.8929	9.93767	12.7409	6.73867	2.5987	11.2695	3.23438	8.9256
											22.6904	11.2231	10.7294	9.97127	12.6216	6.52742	2.76769	11.2805	3.19175	8.9968
											22.5527	11.172	10.8964	9.89127	12.6307	6.68056	2.69383	11.2687	3.23738	8.97647
											22.3775	11.2718	10.9907	9.89498	12.7735	6.51982	2.64261	11.3011	3.23825	8.98966
											22.2322	11.2618	11.1502	9.72584	13.1468	6.66221	2.47282	11.3651	3.3075	8.67557
											22.1854	11.3777	11.0904	9.74444	12.9552	6.59049	2.61084	11.2645	3.31273	8.86838
											22.1042	11.279	11.156	9.64998	13.0299	6.74749	2.6132	11.4485	3.34253	8.62917
											22.5393	11.3154	10.9221	9.94204	12.8063	6.39392	2.60824	11.1897	3.21972	9.06321
											22.801	11.1071	10.8993	9.88961	12.5458	6.67513	2.64626	11.3575	3.13664	8.94161
											22.075	11.1889	11.119	9.76364	12.7053	6.77379	2.74625	11.3767	3.37568	8.87587
											22.2357	11.104	11.056	9.87251	12.5647	6.66906	2.78408	11.4313	3.32718	8.95533
											22.5632	11.2153	10.9757	9.82125	12.4571	6.65873	2.75593	11.2669	3.23182	9.05415
											23.2649	11.0408	10.7649	10.2729	12.7339	6.19394	2.3452	11.0606	3.0444	9.2784
											22.5563	11.1209	10.9666	9.81467	12.3559	6.77814	2.81273	11.3411	3.24305	9.01061
											22.8885	10.9928	11.1291	9.84828	12.1513	6.63085	2.69115	11.5466	3.06136	9.06009
											22.6394	11.1381	10.8873	10.071	12.586	6.5369	2.5916	11.3251	3.09679	9.12788
											22.5811	11.168	10.9026	10.0394	12.7998	6.42526	2.57059	11.2052	3.23537	9.07264
											22.3477	11.0976	11.0966	9.76557	12.6102	6.72583	2.74675	11.3952	3.35375	8.86084
											22.5317	11.2131	10.783	9.97387	12.5893	6.45129	2.85032	11.2866	3.28673	9.03418
											21.82	11.3725	11.2107	9.58	13.2046	6.79028	2.61601	11.3838	3.44515	8.57704
											22.1066	11.3278	11.1212	9.70914	12.8681	6.64602	2.69468	11.3972	3.32704	8.80213
											22.2911	11.3425	10.9941	9.83826	12.8425	6.583	2.63825	11.3076	3.23124	8.93137
											22.4243	11.1508	10.9116	9.93484	12.5439	6.63215	2.7782	11.4012	3.22973	8.99337
											22.4688	11.2694	10.9584	9.88604	12.7755	6.39829	2.69898	11.3055	3.27809	8.96096
											22.4708	11.2541	10.9314	9.82212	12.6074	6.53949	2.81031	11.339	3.28294	8.9424
											22.0634	11.2224	11.0727	9.58737	12.7679	6.98599	2.82019	11.495	3.38169	8.60331
											22.6643	11.0363	10.9316	9.98682	12.4098	6.60365	2.72467	11.4092	3.17228	9.06138
											22.403	11.1349	10.9334	9.89299	12.881	6.684	2.62185	11.3227	3.30041	8.82565
											21.9015	11.2842	11.1045	9.6241	12.7979	6.85237	2.85348	11.4565	3.43461	8.69096
											22.297	11.3221	10.987	9.75369	13.0203	6.59758	2.64103	11.2481	3.35927	8.77396
											22.6032	11.1528	10.9231	10.0046	12.6968	6.44409	2.62435	11.3218	3.19661	9.03263
											21.936	11.2899	10.9448	9.84094	12.8866	6.8027	2.75638	11.4447	3.30498	8.79303
											22.4667	11.2388	11.0229	9.85924	12.5771	6.51696	2.71866	11.3806	3.209	9.01002
											22.6285	11.0313	10.9848	10.0336	12.4939	6.60392	2.60276	11.4542	3.09938	9.06768
											22.5421	11.1047	10.9537	9.94109	12.3412	6.57119	2.82625	11.4556	3.19275	9.07136
											22.3055	11.3309	10.9768	9.78484	12.853	6.47463	2.75652	11.3798	3.31578	8.82232
											22.4336	11.2013	10.9266	9.93999	12.8352	6.59543	2.60068	11.306	3.22801	8.93315
											22.1978	11.3832	10.9463	9.75947	12.7895	6.71157	2.75362	11.2217	3.31945	8.91738
[truncated: 1,763 more rows]
[truncated: 174 more columns]

## Sheet: Fig. 3
Pediculus humanus corporis	Folsomia candida	Harmonia axyridis	Folsomia candida	Anisolabis maritima	Campodea augens	Drosophila melanogaster	Cloeon dipterum	Schizaphis graminum	Aphidius gifuensis	Reticulitermes speratus	Aricia agestis	Columbicola columbae	Chrysoperla carnea	Ischnura elegans	Schistocerca americana	Timema cristinae	Brachyptera putata	Ctenocephalides felis	Mengenilla moldrzyki	Thrips palmi	Limnephilus lunatus
[truncated: 8,990 more rows]

[truncated: 6 more sheets: Fig. S8B, Figs. 4 and S9, Fig. 7, Figs. 9B and S12, Fig. S11, Fig. S13]
