# Supplementary material for: Unsupervised AI reveals insect species-specific genome signatures
Source: PeerJ. 2024 Mar 6;12:e17025. doi: 10.7717/peerj.17025 (PMC10924456; doi:10.7717/peerj.17025)
Supplement: Table S1 [file peerj-12-17025-s020.xlsx]

## Sheet: Sheet1
Table S1: Detail information of each insect genome.
Order	Organism Name	Taxonomy	Strain	BioSample	BioProject	Assembly	Level	Size (Mb)	G+C%	Replicons	WGS	Scaffolds	CDS	Release Date	GenBank FTP	RefSeq FTP
Diplura	Campodea augens	Diplura; Rhabdura; Campodeoidea; Campodeidae; Campodea	MM-2018	SAMN07967199	PRJNA416902	GCA_009757345.1	Scaffold	1127.04	30.2		VUNT01	18761	0	2019-12-16T00:00:00Z	ftp://ftp.ncbi.nlm.nih.gov/genomes/all/GCA/009/757/345/GCA_009757345.1_UGE_Caugens_1.0
Collembola	Folsomia candida	Collembola; Entomobryomorpha; Isotomoidea; Isotomidae; Proisotominae; Folsomia	DK	SAMN17109001	PRJNA686204	GCA_020920555.1	Chromosome	219.078	37.4826	chromosome 1:CM037132.1; chromosome 2:CM037133.1; chromosome 3:CM037134.1; chromosome 4:CM037135.1; chromosome 5:CM037136.1; chromosome 6:CM037137.1; chromosome 7:CM037138.1	JAEMPG01	75	0	2021-11-22T00:00:00Z	ftp://ftp.ncbi.nlm.nih.gov/genomes/all/GCA/020/920/555/GCA_020920555.1_ASM2092055v1
Odonata	Ischnura elegans	Insecta; Dicondylia; Pterygota; Palaeoptera; Odonata; Zygoptera; Coenagrionoidea; Coenagrionidae; Ischnura		SAMEA7521125	PRJEB49079	GCA_921293095.1	Chromosome	1722.74	38.4932	chromosome 1:NC_060246.1/OV121100.1; chromosome 2:NC_060247.1/OV121101.1; chromosome 3:NC_060248.1/OV121102.1; chromosome 4:NC_060249.1/OV121103.1; chromosome 5:NC_060250.1/OV121104.1; chromosome 6:NC_060251.1/OV121105.1; chromosome 7:NC_060252.1/OV121107.1; chromosome 8:NC_060253.1/OV121108.1; chromosome 9:NC_060254.1/OV121109.1; chromosome 10:NC_060255.1/OV121110.1; chromosome 11:NC_060256.1/OV…	CAKLCU01	110	27076	2021-12-05T00:00:00Z	ftp://ftp.ncbi.nlm.nih.gov/genomes/all/GCA/921/293/095/GCA_921293095.1_ioIscEleg1.1	ftp://ftp.ncbi.nlm.nih.gov/genomes/all/GCF/921/293/095/GCF_921293095.1_ioIscEleg1.1
Ephemeroptera	Cloeon dipterum	Insecta; Dicondylia; Pterygota; Palaeoptera; Ephemeroptera; Pisciforma; Baetidae; Cloeon		SAMEA6624811	PRJEB34721	GCA_902829235.1	Scaffold	180.287	39.9		CADEPI01	1395	30082	2020-04-15T00:00:00Z	ftp://ftp.ncbi.nlm.nih.gov/genomes/all/GCA/902/829/235/GCA_902829235.1_CLODIP2
Plecoptera	Brachyptera putata	Insecta; Dicondylia; Pterygota; Neoptera; Polyneoptera; Plecoptera; Nemouroidea; Taeniopterygidae; Brachypterainae; Brachyptera		SAMEA5248727	PRJEB44421	GCA_907164805.1	Chromosome	436.497	36.51	chromosome 1:OU015462.1; chromosome 2:OU015463.1; chromosome 3:OU015464.1; chromosome 4:OU015465.1; chromosome 5:OU015466.1; chromosome 6:OU015467.1; chromosome 7:OU015468.1; chromosome 8:OU015469.1; chromosome 9:OU015470.1; chromosome 10:OU015471.1; chromosome 11:OU015472.1; chromosome 12:OU015473.1; chromosome 13:OU015474.1; chromosome 14:OU015475.1		14	0	2021-05-10T00:00:00Z	ftp://ftp.ncbi.nlm.nih.gov/genomes/all/GCA/907/164/805/GCA_907164805.1_iBraPut3m.1
Orthoptera	Schistocerca americana	Insecta; Dicondylia; Pterygota; Neoptera; Polyneoptera; Orthoptera; Caelifera; Acrididea; Acridomorpha; Acridoidea; Acrididae; Cyrtacanthacridinae; Schistocerca	TAMUIC-IGC-003095	SAMN18214781	PRJNA772266	GCA_021461395.2	Chromosome	8990.37	42.3072	chromosome 1:CM038234.1; chromosome 2:CM038235.1; chromosome 3:CM038236.1; chromosome 4:CM038237.1; chromosome 5:CM038238.1; chromosome 6:CM038239.1; chromosome 7:CM038240.1; chromosome 8:CM038241.1; chromosome 9:CM038242.1; chromosome 10:CM038243.1; chromosome 11:CM038244.1; chromosome X:CM038245.1; mitochondrion:OM650688.1	JAJNAC01	1751	13	2022-01-13T00:00:00Z	ftp://ftp.ncbi.nlm.nih.gov/genomes/all/GCA/021/461/395/GCA_021461395.2_iqSchAmer2.1
Phasmida	Timema cristinae	Insecta; Dicondylia; Pterygota; Neoptera; Polyneoptera; Phasmatodea; Timematodea; Timematoidea; Timematidae; Timema	15_0190+16_0359	SAMN07998552	PRJNA417530	GCA_002928295.1	Chromosome	955.49	34.8849	chromosome LG1:CM009472.1; chromosome LG10:CM009473.1; chromosome LG11:CM009474.1; chromosome LG12:CM009475.1; chromosome LG13:CM009476.1; chromosome LG2:CM009477.1; chromosome LG3:CM009478.1; chromosome LG4:CM009479.1; chromosome LG5:CM009480.1; chromosome LG6:CM009481.1; chromosome LG7:CM009482.1; chromosome LG8:CM009483.1; chromosome LG9:CM009484.1	PGFK01	3839	0	2018-02-13T00:00:00Z	ftp://ftp.ncbi.nlm.nih.gov/genomes/all/GCA/002/928/295/GCA_002928295.1_tcristinae_1.3c2
Dermaptera	Anisolabis maritima	Insecta; Dicondylia; Pterygota; Neoptera; Polyneoptera; Dermaptera; Forficulina; Anisolabidoidea; Anisolabididae; Anisolabis	W2EQDB614N	SAMN10247385	PRJNA497080	GCA_010014785.1	Scaffold	641.675	31.1		JAAAKE01	82224	0	2020-01-30T00:00:00Z	ftp://ftp.ncbi.nlm.nih.gov/genomes/all/GCA/010/014/785/GCA_010014785.1_ASM1001478v1
Blattaria	Periplaneta americana	Insecta; Dicondylia; Pterygota; Neoptera; Polyneoptera; Dictyoptera; Blattodea; Blattoidea; Blattidae; Blattinae; Periplaneta	Shanghai urban area	SAMN07820878	PRJNA414776	GCA_002939525.1	Scaffold	3374.84	34.1		PGRX01	18601	0	2018-02-23T00:00:00Z	ftp://ftp.ncbi.nlm.nih.gov/genomes/all/GCA/002/939/525/GCA_002939525.1_ASM293952v1
Isoptera	Reticulitermes speratus	Insecta; Dicondylia; Pterygota; Neoptera; Polyneoptera; Dictyoptera; Blattodea; Blattoidea; Termitoidae; Rhinotermitidae; Heterotermitinae; Reticulitermes; Frontotermes	ELV_2017	SAMN23070905	PRJNA779705	GCA_021186555.1	Scaffold	880.619	39.9		JAJKFL01	427	0	2021-12-14T00:00:00Z	ftp://ftp.ncbi.nlm.nih.gov/genomes/all/GCA/021/186/555/GCA_021186555.1_TAMU-RSper-2021
Mallophaga	Columbicola columbae	Insecta; Dicondylia; Pterygota; Neoptera; Paraneoptera; Psocodea; Phthiraptera; Ischnocera; Philopteridae; Columbicola	jgb_00001	SAMN16076762	PRJNA662097	GCA_016920875.1	Scaffold	207.888	36.1		JADMLL01	386	0	2021-02-23T00:00:00Z	ftp://ftp.ncbi.nlm.nih.gov/genomes/all/GCA/016/920/875/GCA_016920875.1_Utah_Ccol_1.0
Anoplura	Pediculus humanus corporis	Insecta; Dicondylia; Pterygota; Neoptera; Paraneoptera; Psocodea; Phthiraptera; Anoplura; Pediculidae; Pediculus; Pediculus humanus	USDA	SAMN02953682	PRJNA16223	GCA_000006295.1	Scaffold	110.781	27.9		AAZO01	1882	10775	2007-04-18T00:00:00Z	ftp://ftp.ncbi.nlm.nih.gov/genomes/all/GCA/000/006/295/GCA_000006295.1_JCVI_LOUSE_1.0	ftp://ftp.ncbi.nlm.nih.gov/genomes/all/GCF/000/006/295/GCF_000006295.1_JCVI_LOUSE_1.0
Hemiptera	Schizaphis graminum	Insecta; Dicondylia; Pterygota; Neoptera; Paraneoptera; Hemiptera; Sternorrhyncha; Aphidomorpha; Aphidoidea; Aphididae; Aphidinae; Aphidini; Schizaphis	BZ-2018	SAMN22210469	PRJNA770157	GCA_020882235.1	Chromosome	499.222	27.9787	chromosome 1:CM037031.1; chromosome 2:CM037032.1; chromosome 3:CM037033.1; chromosome 4:CM037034.1; chromosome 5:CM037035.1; chromosome 6:CM037036.1	JAJFBB01	22	0	2021-11-16T00:00:00Z	ftp://ftp.ncbi.nlm.nih.gov/genomes/all/GCA/020/882/235/GCA_020882235.1_ASM2088223v1
Thysanoptera	Thrips palmi	Insecta; Dicondylia; Pterygota; Neoptera; Paraneoptera; Thysanoptera; Terebrantia; Thripoidea; Thripidae; Thripinae; Thrips	BJ-2018	SAMN14133010	PRJNA632616	GCA_012932325.1	Scaffold	237.845	54.0979	mitochondrion MT:NC_039437.1/	JABBCG01	17	27217	2020-04-29T00:00:00Z	ftp://ftp.ncbi.nlm.nih.gov/genomes/all/GCA/012/932/325/GCA_012932325.1_TpBJ-2018v1	ftp://ftp.ncbi.nlm.nih.gov/genomes/all/GCF/012/932/325/GCF_012932325.1_TpBJ-2018v1
Neuroptera	Chrysoperla carnea	Insecta; Dicondylia; Pterygota; Neoptera; Endopterygota; Neuropterida; Neuroptera; Hemerobiiformia; Chrysopidae; Chrysopinae; Chrysoperla		SAMEA7520372	PRJEB44056	GCA_905475395.1	Chromosome	560.233	29.0825	chromosome 1:NC_058337.1/FR997754.1; chromosome 2:NC_058338.1/FR997755.1; chromosome 3:NC_058339.1/FR997756.1; chromosome 4:NC_058340.1/FR997757.1; chromosome 5:NC_058341.1/FR997758.1; chromosome X:NC_058342.1/FR997759.1; mitochondrion MT:FR997760.1	CAJQGA01	337	17649	2021-04-07T00:00:00Z	ftp://ftp.ncbi.nlm.nih.gov/genomes/all/GCA/905/475/395/GCA_905475395.1_inChrCarn1.1	ftp://ftp.ncbi.nlm.nih.gov/genomes/all/GCF/905/475/395/GCF_905475395.1_inChrCarn1.1
Strepsiptera	Mengenilla moldrzyki	Insecta; Dicondylia; Pterygota; Neoptera; Endopterygota; Strepsiptera; Mengenillidia; Mengenilloidea; Mengenillidae; Mengenilla		SAMN00715019	PRJNA72521	GCA_000281935.1	Contig	155.727	28.7		AGDA01	94953	0	2012-07-27T00:00:00Z	ftp://ftp.ncbi.nlm.nih.gov/genomes/all/GCA/000/281/935/GCA_000281935.1_Memo_1.0
Siphonaptera	Ctenocephalides felis	Insecta; Dicondylia; Pterygota; Neoptera; Endopterygota; Siphonaptera; Pulicomorpha; Pulicoidea; Pulicidae; Archaeopsyllinae; Ctenocephalides	EL2017-DRISC	SAMN09779028	PRJNA489461	GCA_003426905.1	Scaffold	775.453	29.8		QVAO01	3733	21954	2018-08-24T00:00:00Z	ftp://ftp.ncbi.nlm.nih.gov/genomes/all/GCA/003/426/905/GCA_003426905.1_ASM342690v1	ftp://ftp.ncbi.nlm.nih.gov/genomes/all/GCF/003/426/905/GCF_003426905.1_ASM342690v1
Diptera	Drosophila melanogaster	Insecta; Dicondylia; Pterygota; Neoptera; Endopterygota; Diptera; Brachycera; Muscomorpha; Eremoneura; Cyclorrhapha; Schizophora; Acalyptratae; Ephydroidea; Drosophilidae; Drosophilinae; Drosophilini; Drosophila; Sophophora; melanogaster group; melanogaster subgroup	rover (forR)	SAMN07568472	PRJNA400465	GCA_002310775.1	Chromosome	120.381	42.438	chromosome X:CP023335.1; chromosome 2L:CP023339.1; chromosome 2R:CP023338.1; chromosome 3L:CP023337.1; chromosome 3R:CP023336.1; chromosome 4:CP023340.1		6	0	2017-09-18T00:00:00Z	ftp://ftp.ncbi.nlm.nih.gov/genomes/all/GCA/002/310/775/GCA_002310775.1_ASM231077v1
Lepidoptera	Aricia agestis	Insecta; Dicondylia; Pterygota; Neoptera; Endopterygota; Amphiesmenoptera; Lepidoptera; Glossata; Neolepidoptera; Heteroneura; Ditrysia; Obtectomera; Papilionoidea; Lycaenidae; Polyommatinae; Aricia		SAMEA7523300	PRJEB41901	GCA_905147365.1	Chromosome	435.265	36.8665	chromosome 1:NC_056406.1/LR990257.1; chromosome 2:NC_056407.1/LR990258.1; chromosome 3:NC_056408.1/LR990259.1; chromosome 4:NC_056409.1/LR990260.1; chromosome 5:NC_056410.1/LR990261.1; chromosome 6:NC_056411.1/LR990262.1; chromosome 7:NC_056412.1/LR990263.1; chromosome 8:NC_056413.1/LR990264.1; chromosome 9:NC_056414.1/LR990265.1; chromosome 10:NC_056415.1/LR990266.1; chromosome 11:NC_056416.1/LR…	CAJHVJ01	25	21296	2021-01-25T00:00:00Z	ftp://ftp.ncbi.nlm.nih.gov/genomes/all/GCA/905/147/365/GCA_905147365.1_ilAriAges1.1	ftp://ftp.ncbi.nlm.nih.gov/genomes/all/GCF/905/147/365/GCF_905147365.1_ilAriAges1.1
Trichoptera	Limnephilus lunatus	Insecta; Dicondylia; Pterygota; Neoptera; Endopterygota; Amphiesmenoptera; Trichoptera; Integripalpia; Plenitentoria; Limnephiloidea; Limnephilidae; Limnephilinae; Limnephilini; Limnephilus		SAMEA7521206	PRJEB48032	GCA_917563855.2	Chromosome	1269.65	35.0231	chromosome 1:OU830592.1; chromosome 2:OU830593.1; chromosome 3:OU830594.1; chromosome 4:OU830595.1; chromosome 5:OU830596.1; chromosome 6:OU830597.1; chromosome 7:OU830598.1; chromosome 8:OU830599.1; chromosome 9:OU830600.1; chromosome 10:OU830601.1; chromosome 11:OU830602.1; chromosome 12:OU830603.1; chromosome Z:OU830604.1; mitochondrion MT:OU830605.1	CAKJTF02	39	0	2021-10-14T00:00:00Z	ftp://ftp.ncbi.nlm.nih.gov/genomes/all/GCA/917/563/855/GCA_917563855.2_iiLimLuna2.2
Hymenoptera	Aphidius gifuensis	Insecta; Dicondylia; Pterygota; Neoptera; Endopterygota; Hymenoptera; Apocrita; Parasitoida; Ichneumonoidea; Braconidae; Aphidiinae; Aphidius	YNYX2018	SAMN14446980	PRJNA764230	GCA_014905175.1	Chromosome	156.965	26.4722	linkage group LG1:NC_057788.1/CM026521.1; linkage group LG2:NC_057789.1/CM026522.1; linkage group LG3:NC_057790.1/CM026523.1; linkage group LG4:NC_057791.1/CM026524.1; linkage group LG5:NC_057792.1/CM026525.1; linkage group LG6:NC_057793.1/CM026526.1; mitochondrion MT:NC_054223.1/	JACMRX01	25	20617	2020-10-21T00:00:00Z	ftp://ftp.ncbi.nlm.nih.gov/genomes/all/GCA/014/905/175/GCA_014905175.1_ASM1490517v1	ftp://ftp.ncbi.nlm.nih.gov/genomes/all/GCF/014/905/175/GCF_014905175.1_ASM1490517v1
Coleoptera	Harmonia axyridis	Insecta; Dicondylia; Pterygota; Neoptera; Endopterygota; Coleoptera; Polyphaga; Cucujiformia; Cucujoidea; Coccinellidae; Coccinellinae; Coccinellini; Harmonia		SAMEA7520208	PRJEB47373	GCA_914767665.1	Chromosome	425.525	35.1438	chromosome 1:NC_059501.1/OU611927.1; chromosome 2:NC_059502.1/OU611928.1; chromosome 3:NC_059503.1/OU611929.1; chromosome 4:NC_059504.1/OU611930.1; chromosome 5:NC_059505.1/OU611931.1; chromosome 6:NC_059506.1/OU611932.1; chromosome 7:NC_059507.1/OU611934.1; chromosome X:NC_059508.1/OU611933.1; mitochondrion MT:OU611935.1	CAJZBN01	13	23861	2021-09-11T00:00:00Z	ftp://ftp.ncbi.nlm.nih.gov/genomes/all/GCA/914/767/665/GCA_914767665.1_icHarAxyr1.1	ftp://ftp.ncbi.nlm.nih.gov/genomes/all/GCF/914/767/665/GCF_914767665.1_icHarAxyr1.1
