# Supplementary material for: Unsupervised AI reveals insect species-specific genome signatures
Source: PeerJ. 2024 Mar 6;12:e17025. doi: 10.7717/peerj.17025 (PMC10924456; doi:10.7717/peerj.17025)
Supplement: Table S2 — The content of each column is as follows. Species: Species name of the insect species whose SZ was noted in Figure 8. SZ: Name of SZ in Figure 8. Sequences from which SZs were obtained. Start (or End) of SZ: Start (or End) genomic position of the SZ. [file peerj-12-17025-s021.xlsx]

## Sheet: Sheet1
Table S2: List of insect special zones (SZs).
Species	SZ	Sequences from which SZs were obtained	Start of SZ	End of SZ
Folsomia candida	can1	>CM037132.1 Folsomia candida isolate DK chromosome 1, whole genome shotgun sequence	44200001	44300000
Folsomia candida	can1	>CM037133.1 Folsomia candida isolate DK chromosome 2, whole genome shotgun sequence	18529995	18629994
Folsomia candida	can1	>CM037137.1 Folsomia candida isolate DK chromosome 6, whole genome shotgun sequence	687972	787971
Folsomia candida	can1	>CM037138.1 Folsomia candida isolate DK chromosome 7, whole genome shotgun sequence	494959	594958
Folsomia candida	can1	>JAEMPG010000027.1 Folsomia candida isolate DK Fcandk_Un020, whole genome shotgun sequence	10359	23772
Folsomia candida	can1	>JAEMPG010000028.1 Folsomia candida isolate DK Fcandk_Un021, whole genome shotgun sequence	1	20197
Folsomia candida	can1	>JAEMPG010000029.1 Folsomia candida isolate DK Fcandk_Un022, whole genome shotgun sequence	1	19324
Folsomia candida	can1	>JAEMPG010000030.1 Folsomia candida isolate DK Fcandk_Un023, whole genome shotgun sequence	1	18000
Folsomia candida	can1	>JAEMPG010000031.1 Folsomia candida isolate DK Fcandk_Un024, whole genome shotgun sequence	1	16710
Folsomia candida	can1	>JAEMPG010000032.1 Folsomia candida isolate DK Fcandk_Un025, whole genome shotgun sequence	1	12350
Cloeon dipterum	dip1	>CADEPI010000019.1 Cloeon dipterum genome assembly, contig: clodip2_s0019, whole genome shotgun sequence	104846	204845
Cloeon dipterum	dip1	>CADEPI010000107.1 Cloeon dipterum genome assembly, contig: clodip2_s0107, whole genome shotgun sequence	39248	139247
Cloeon dipterum	dip1	>CADEPI010000222.1 Cloeon dipterum genome assembly, contig: clodip2_s0222, whole genome shotgun sequence	136963	198575
Cloeon dipterum	dip1	>CADEPI010000223.1 Cloeon dipterum genome assembly, contig: clodip2_s0223, whole genome shotgun sequence	1	38386
Cloeon dipterum	dip1	>CADEPI010000295.1 Cloeon dipterum genome assembly, contig: clodip2_s0295, whole genome shotgun sequence	81590	147248
Cloeon dipterum	dip1	>CADEPI010000296.1 Cloeon dipterum genome assembly, contig: clodip2_s0296, whole genome shotgun sequence	1	34340
Cloeon dipterum	dip1	>CADEPI010000389.1 Cloeon dipterum genome assembly, contig: clodip2_s0389, whole genome shotgun sequence	80632	96936
Cloeon dipterum	dip1	>CADEPI010000390.1 Cloeon dipterum genome assembly, contig: clodip2_s0390, whole genome shotgun sequence	1	83694
Cloeon dipterum	dip1	>CADEPI010000466.1 Cloeon dipterum genome assembly, contig: clodip2_s0466, whole genome shotgun sequence	71977	75721
Cloeon dipterum	dip1	>CADEPI010000467.1 Cloeon dipterum genome assembly, contig: clodip2_s0467, whole genome shotgun sequence	1	75683
Cloeon dipterum	dip1	>CADEPI010000468.1 Cloeon dipterum genome assembly, contig: clodip2_s0468, whole genome shotgun sequence	1	20570
Cloeon dipterum	dip1	>CADEPI010000474.1 Cloeon dipterum genome assembly, contig: clodip2_s0474, whole genome shotgun sequence	69937	73981
Cloeon dipterum	dip1	>CADEPI010000475.1 Cloeon dipterum genome assembly, contig: clodip2_s0475, whole genome shotgun sequence	1	73859
Cloeon dipterum	dip1	>CADEPI010000476.1 Cloeon dipterum genome assembly, contig: clodip2_s0476, whole genome shotgun sequence	1	22094
Cloeon dipterum	dip1	>CADEPI010000483.1 Cloeon dipterum genome assembly, contig: clodip2_s0483, whole genome shotgun sequence	10314	71876
Cloeon dipterum	dip1	>CADEPI010000484.1 Cloeon dipterum genome assembly, contig: clodip2_s0484, whole genome shotgun sequence	1	38436
Cloeon dipterum	dip1	>CADEPI010000536.1 Cloeon dipterum genome assembly, contig: clodip2_s0536, whole genome shotgun sequence	9129	59987
Cloeon dipterum	dip1	>CADEPI010000537.1 Cloeon dipterum genome assembly, contig: clodip2_s0537, whole genome shotgun sequence	1	49140
Cloeon dipterum	dip1	>CADEPI010000537.1 Cloeon dipterum genome assembly, contig: clodip2_s0537, whole genome shotgun sequence	49141	59594
Cloeon dipterum	dip1	>CADEPI010000538.1 Cloeon dipterum genome assembly, contig: clodip2_s0538, whole genome shotgun sequence	1	59444
Cloeon dipterum	dip1	>CADEPI010000539.1 Cloeon dipterum genome assembly, contig: clodip2_s0539, whole genome shotgun sequence	1	30100
Cloeon dipterum	dip1	>CADEPI010000542.1 Cloeon dipterum genome assembly, contig: clodip2_s0542, whole genome shotgun sequence	56086	57664
Cloeon dipterum	dip1	>CADEPI010000543.1 Cloeon dipterum genome assembly, contig: clodip2_s0543, whole genome shotgun sequence	1	56981
Cloeon dipterum	dip1	>CADEPI010000544.1 Cloeon dipterum genome assembly, contig: clodip2_s0544, whole genome shotgun sequence	1	41438
Cloeon dipterum	dip1	>CADEPI010000557.1 Cloeon dipterum genome assembly, contig: clodip2_s0557, whole genome shotgun sequence	24865	54155
Cloeon dipterum	dip1	>CADEPI010000558.1 Cloeon dipterum genome assembly, contig: clodip2_s0558, whole genome shotgun sequence	1	54149
Cloeon dipterum	dip1	>CADEPI010000559.1 Cloeon dipterum genome assembly, contig: clodip2_s0559, whole genome shotgun sequence	1	16558
Cloeon dipterum	dip1	>CADEPI010000570.1 Cloeon dipterum genome assembly, contig: clodip2_s0570, whole genome shotgun sequence	29537	52043
Cloeon dipterum	dip1	>CADEPI010000571.1 Cloeon dipterum genome assembly, contig: clodip2_s0571, whole genome shotgun sequence	1	51997
Cloeon dipterum	dip1	>CADEPI010000572.1 Cloeon dipterum genome assembly, contig: clodip2_s0572, whole genome shotgun sequence	1	25494
Cloeon dipterum	dip1	>CADEPI010000572.1 Cloeon dipterum genome assembly, contig: clodip2_s0572, whole genome shotgun sequence	25495	51826
Cloeon dipterum	dip1	>CADEPI010000573.1 Cloeon dipterum genome assembly, contig: clodip2_s0573, whole genome shotgun sequence	1	51764
Cloeon dipterum	dip1	>CADEPI010000574.1 Cloeon dipterum genome assembly, contig: clodip2_s0574, whole genome shotgun sequence	1	21902
Cloeon dipterum	dip1	>CADEPI010000590.1 Cloeon dipterum genome assembly, contig: clodip2_s0590, whole genome shotgun sequence	13227	49317
Cloeon dipterum	dip1	>CADEPI010000591.1 Cloeon dipterum genome assembly, contig: clodip2_s0591, whole genome shotgun sequence	1	49228
Cloeon dipterum	dip1	>CADEPI010000592.1 Cloeon dipterum genome assembly, contig: clodip2_s0592, whole genome shotgun sequence	14680	48865
Cloeon dipterum	dip1	>CADEPI010000592.1 Cloeon dipterum genome assembly, contig: clodip2_s0592, whole genome shotgun sequence	1	14679
Cloeon dipterum	dip1	>CADEPI010000593.1 Cloeon dipterum genome assembly, contig: clodip2_s0593, whole genome shotgun sequence	1	48803
Cloeon dipterum	dip1	>CADEPI010000594.1 Cloeon dipterum genome assembly, contig: clodip2_s0594, whole genome shotgun sequence	1	17009
Cloeon dipterum	dip1	>CADEPI010000594.1 Cloeon dipterum genome assembly, contig: clodip2_s0594, whole genome shotgun sequence	17010	48291
Cloeon dipterum	dip1	>CADEPI010000595.1 Cloeon dipterum genome assembly, contig: clodip2_s0595, whole genome shotgun sequence	1	48214
Cloeon dipterum	dip1	>CADEPI010000596.1 Cloeon dipterum genome assembly, contig: clodip2_s0596, whole genome shotgun sequence	1	20502
Cloeon dipterum	dip1	>CADEPI010000596.1 Cloeon dipterum genome assembly, contig: clodip2_s0596, whole genome shotgun sequence	20503	47816
Cloeon dipterum	dip1	>CADEPI010000597.1 Cloeon dipterum genome assembly, contig: clodip2_s0597, whole genome shotgun sequence	1	47797
Cloeon dipterum	dip1	>CADEPI010000598.1 Cloeon dipterum genome assembly, contig: clodip2_s0598, whole genome shotgun sequence	1	24887
Cloeon dipterum	dip1	>CADEPI010000600.1 Cloeon dipterum genome assembly, contig: clodip2_s0600, whole genome shotgun sequence	29924	47458
Cloeon dipterum	dip1	>CADEPI010000601.1 Cloeon dipterum genome assembly, contig: clodip2_s0601, whole genome shotgun sequence	1	47090
Cloeon dipterum	dip1	>CADEPI010000602.1 Cloeon dipterum genome assembly, contig: clodip2_s0602, whole genome shotgun sequence	1	35373
Cloeon dipterum	dip1	>CADEPI010000607.1 Cloeon dipterum genome assembly, contig: clodip2_s0607, whole genome shotgun sequence	3199	46117
Cloeon dipterum	dip1	>CADEPI010000608.1 Cloeon dipterum genome assembly, contig: clodip2_s0608, whole genome shotgun sequence	1	46104
Cloeon dipterum	dip1	>CADEPI010000609.1 Cloeon dipterum genome assembly, contig: clodip2_s0609, whole genome shotgun sequence	1	10975
Cloeon dipterum	dip1	>CADEPI010000609.1 Cloeon dipterum genome assembly, contig: clodip2_s0609, whole genome shotgun sequence	10976	45996
Cloeon dipterum	dip1	>CADEPI010000610.1 Cloeon dipterum genome assembly, contig: clodip2_s0610, whole genome shotgun sequence	1	45912
Cloeon dipterum	dip1	>CADEPI010000611.1 Cloeon dipterum genome assembly, contig: clodip2_s0611, whole genome shotgun sequence	19066	45886
Cloeon dipterum	dip1	>CADEPI010000611.1 Cloeon dipterum genome assembly, contig: clodip2_s0611, whole genome shotgun sequence	1	19065
Cloeon dipterum	dip1	>CADEPI010000612.1 Cloeon dipterum genome assembly, contig: clodip2_s0612, whole genome shotgun sequence	1	45651
Cloeon dipterum	dip1	>CADEPI010000613.1 Cloeon dipterum genome assembly, contig: clodip2_s0613, whole genome shotgun sequence	1	27526
Cloeon dipterum	dip1	>CADEPI010000618.1 Cloeon dipterum genome assembly, contig: clodip2_s0618, whole genome shotgun sequence	4490	44088
Cloeon dipterum	dip1	>CADEPI010000619.1 Cloeon dipterum genome assembly, contig: clodip2_s0619, whole genome shotgun sequence	1	43911
Cloeon dipterum	dip1	>CADEPI010000620.1 Cloeon dipterum genome assembly, contig: clodip2_s0620, whole genome shotgun sequence	16489	43771
Cloeon dipterum	dip1	>CADEPI010000620.1 Cloeon dipterum genome assembly, contig: clodip2_s0620, whole genome shotgun sequence	1	16488
Cloeon dipterum	dip1	>CADEPI010000621.1 Cloeon dipterum genome assembly, contig: clodip2_s0621, whole genome shotgun sequence	1	43725
Cloeon dipterum	dip1	>CADEPI010000622.1 Cloeon dipterum genome assembly, contig: clodip2_s0622, whole genome shotgun sequence	1	28990
Cloeon dipterum	dip1	>CADEPI010000625.1 Cloeon dipterum genome assembly, contig: clodip2_s0625, whole genome shotgun sequence	105	42679
Cloeon dipterum	dip1	>CADEPI010000626.1 Cloeon dipterum genome assembly, contig: clodip2_s0626, whole genome shotgun sequence	1	42155
Cloeon dipterum	dip1	>CADEPI010000627.1 Cloeon dipterum genome assembly, contig: clodip2_s0627, whole genome shotgun sequence	1	15268
Cloeon dipterum	dip1	>CADEPI010000627.1 Cloeon dipterum genome assembly, contig: clodip2_s0627, whole genome shotgun sequence	15269	42119
Cloeon dipterum	dip1	>CADEPI010000628.1 Cloeon dipterum genome assembly, contig: clodip2_s0628, whole genome shotgun sequence	1	41361
Cloeon dipterum	dip1	>CADEPI010000629.1 Cloeon dipterum genome assembly, contig: clodip2_s0629, whole genome shotgun sequence	31787	41091
Cloeon dipterum	dip1	>CADEPI010000629.1 Cloeon dipterum genome assembly, contig: clodip2_s0629, whole genome shotgun sequence	1	31786
Cloeon dipterum	dip1	>CADEPI010000630.1 Cloeon dipterum genome assembly, contig: clodip2_s0630, whole genome shotgun sequence	1	41084
Cloeon dipterum	dip1	>CADEPI010000631.1 Cloeon dipterum genome assembly, contig: clodip2_s0631, whole genome shotgun sequence	1	40922
Cloeon dipterum	dip1	>CADEPI010000632.1 Cloeon dipterum genome assembly, contig: clodip2_s0632, whole genome shotgun sequence	1	8686
Cloeon dipterum	dip1	>CADEPI010000634.1 Cloeon dipterum genome assembly, contig: clodip2_s0634, whole genome shotgun sequence	27173	40477
Cloeon dipterum	dip1	>CADEPI010000635.1 Cloeon dipterum genome assembly, contig: clodip2_s0635, whole genome shotgun sequence	1	40406
Cloeon dipterum	dip1	>CADEPI010000636.1 Cloeon dipterum genome assembly, contig: clodip2_s0636, whole genome shotgun sequence	1	40365
Cloeon dipterum	dip1	>CADEPI010000637.1 Cloeon dipterum genome assembly, contig: clodip2_s0637, whole genome shotgun sequence	1	5921
Cloeon dipterum	dip1	>CADEPI010000637.1 Cloeon dipterum genome assembly, contig: clodip2_s0637, whole genome shotgun sequence	5922	40359
Cloeon dipterum	dip1	>CADEPI010000638.1 Cloeon dipterum genome assembly, contig: clodip2_s0638, whole genome shotgun sequence	1	40338
Cloeon dipterum	dip1	>CADEPI010000639.1 Cloeon dipterum genome assembly, contig: clodip2_s0639, whole genome shotgun sequence	1	25222
Cloeon dipterum	dip1	>CADEPI010000642.1 Cloeon dipterum genome assembly, contig: clodip2_s0642, whole genome shotgun sequence	4688	40021
Cloeon dipterum	dip1	>CADEPI010000643.1 Cloeon dipterum genome assembly, contig: clodip2_s0643, whole genome shotgun sequence	1	39915
Cloeon dipterum	dip1	>CADEPI010000644.1 Cloeon dipterum genome assembly, contig: clodip2_s0644, whole genome shotgun sequence	1	24749
Cloeon dipterum	dip1	>CADEPI010000654.1 Cloeon dipterum genome assembly, contig: clodip2_s0654, whole genome shotgun sequence	30374	38547
Cloeon dipterum	dip1	>CADEPI010000655.1 Cloeon dipterum genome assembly, contig: clodip2_s0655, whole genome shotgun sequence	1	38398
Cloeon dipterum	dip1	>CADEPI010000656.1 Cloeon dipterum genome assembly, contig: clodip2_s0656, whole genome shotgun sequence	1	38248
Cloeon dipterum	dip1	>CADEPI010000657.1 Cloeon dipterum genome assembly, contig: clodip2_s0657, whole genome shotgun sequence	15178	38213
Cloeon dipterum	dip1	>CADEPI010000657.1 Cloeon dipterum genome assembly, contig: clodip2_s0657, whole genome shotgun sequence	1	15177
Cloeon dipterum	dip1	>CADEPI010000658.1 Cloeon dipterum genome assembly, contig: clodip2_s0658, whole genome shotgun sequence	1	38185
Cloeon dipterum	dip1	>CADEPI010000659.1 Cloeon dipterum genome assembly, contig: clodip2_s0659, whole genome shotgun sequence	1	38160
Cloeon dipterum	dip1	>CADEPI010000660.1 Cloeon dipterum genome assembly, contig: clodip2_s0660, whole genome shotgun sequence	1	616
Cloeon dipterum	dip1	>CADEPI010000660.1 Cloeon dipterum genome assembly, contig: clodip2_s0660, whole genome shotgun sequence	617	38135
Cloeon dipterum	dip1	>CADEPI010000661.1 Cloeon dipterum genome assembly, contig: clodip2_s0661, whole genome shotgun sequence	1	38130
Cloeon dipterum	dip1	>CADEPI010000662.1 Cloeon dipterum genome assembly, contig: clodip2_s0662, whole genome shotgun sequence	1	24349
Cloeon dipterum	dip1	>CADEPI010000665.1 Cloeon dipterum genome assembly, contig: clodip2_s0665, whole genome shotgun sequence	10880	37681
Cloeon dipterum	dip1	>CADEPI010000666.1 Cloeon dipterum genome assembly, contig: clodip2_s0666, whole genome shotgun sequence	1	36982
Cloeon dipterum	dip1	>CADEPI010000667.1 Cloeon dipterum genome assembly, contig: clodip2_s0667, whole genome shotgun sequence	36215	36926
Cloeon dipterum	dip1	>CADEPI010000667.1 Cloeon dipterum genome assembly, contig: clodip2_s0667, whole genome shotgun sequence	1	36214
Cloeon dipterum	dip1	>CADEPI010000668.1 Cloeon dipterum genome assembly, contig: clodip2_s0668, whole genome shotgun sequence	1	36850
Cloeon dipterum	dip1	>CADEPI010000669.1 Cloeon dipterum genome assembly, contig: clodip2_s0669, whole genome shotgun sequence	1	36607
Cloeon dipterum	dip1	>CADEPI010000670.1 Cloeon dipterum genome assembly, contig: clodip2_s0670, whole genome shotgun sequence	1	25828
Cloeon dipterum	dip1	>CADEPI010000673.1 Cloeon dipterum genome assembly, contig: clodip2_s0673, whole genome shotgun sequence	16489	36325
Cloeon dipterum	dip1	>CADEPI010000674.1 Cloeon dipterum genome assembly, contig: clodip2_s0674, whole genome shotgun sequence	1	36197
Cloeon dipterum	dip1	>CADEPI010000675.1 Cloeon dipterum genome assembly, contig: clodip2_s0675, whole genome shotgun sequence	1	36194
Cloeon dipterum	dip1	>CADEPI010000676.1 Cloeon dipterum genome assembly, contig: clodip2_s0676, whole genome shotgun sequence	1	7769
Cloeon dipterum	dip1	>CADEPI010000678.1 Cloeon dipterum genome assembly, contig: clodip2_s0678, whole genome shotgun sequence	35527	35646
Cloeon dipterum	dip1	>CADEPI010000679.1 Cloeon dipterum genome assembly, contig: clodip2_s0679, whole genome shotgun sequence	1	35639
Cloeon dipterum	dip1	>CADEPI010000680.1 Cloeon dipterum genome assembly, contig: clodip2_s0680, whole genome shotgun sequence	1	35457
Cloeon dipterum	dip1	>CADEPI010000681.1 Cloeon dipterum genome assembly, contig: clodip2_s0681, whole genome shotgun sequence	1	28781
Cloeon dipterum	dip1	>CADEPI010000681.1 Cloeon dipterum genome assembly, contig: clodip2_s0681, whole genome shotgun sequence	28782	35368
Cloeon dipterum	dip1	>CADEPI010000682.1 Cloeon dipterum genome assembly, contig: clodip2_s0682, whole genome shotgun sequence	1	35136
Cloeon dipterum	dip1	>CADEPI010000683.1 Cloeon dipterum genome assembly, contig: clodip2_s0683, whole genome shotgun sequence	1	34991
Cloeon dipterum	dip1	>CADEPI010000684.1 Cloeon dipterum genome assembly, contig: clodip2_s0684, whole genome shotgun sequence	23284	34928
Cloeon dipterum	dip1	>CADEPI010000684.1 Cloeon dipterum genome assembly, contig: clodip2_s0684, whole genome shotgun sequence	1	23283
Cloeon dipterum	dip1	>CADEPI010000685.1 Cloeon dipterum genome assembly, contig: clodip2_s0685, whole genome shotgun sequence	1	34439
Cloeon dipterum	dip1	>CADEPI010000686.1 Cloeon dipterum genome assembly, contig: clodip2_s0686, whole genome shotgun sequence	1	34424
Cloeon dipterum	dip1	>CADEPI010000687.1 Cloeon dipterum genome assembly, contig: clodip2_s0687, whole genome shotgun sequence	1	19489
Cloeon dipterum	dip1	>CADEPI010000693.1 Cloeon dipterum genome assembly, contig: clodip2_s0693, whole genome shotgun sequence	15864	33655
Cloeon dipterum	dip1	>CADEPI010000694.1 Cloeon dipterum genome assembly, contig: clodip2_s0694, whole genome shotgun sequence	1	33519
Cloeon dipterum	dip1	>CADEPI010000695.1 Cloeon dipterum genome assembly, contig: clodip2_s0695, whole genome shotgun sequence	1	33474
Cloeon dipterum	dip1	>CADEPI010000696.1 Cloeon dipterum genome assembly, contig: clodip2_s0696, whole genome shotgun sequence	15213	33372
Cloeon dipterum	dip1	>CADEPI010000696.1 Cloeon dipterum genome assembly, contig: clodip2_s0696, whole genome shotgun sequence	1	15212
Cloeon dipterum	dip1	>CADEPI010000697.1 Cloeon dipterum genome assembly, contig: clodip2_s0697, whole genome shotgun sequence	1	33353
Cloeon dipterum	dip1	>CADEPI010000698.1 Cloeon dipterum genome assembly, contig: clodip2_s0698, whole genome shotgun sequence	1	33118
Cloeon dipterum	dip1	>CADEPI010000699.1 Cloeon dipterum genome assembly, contig: clodip2_s0699, whole genome shotgun sequence	1	15366
Cloeon dipterum	dip1	>CADEPI010000699.1 Cloeon dipterum genome assembly, contig: clodip2_s0699, whole genome shotgun sequence	15367	32995
Cloeon dipterum	dip1	>CADEPI010000700.1 Cloeon dipterum genome assembly, contig: clodip2_s0700, whole genome shotgun sequence	1	32936
Cloeon dipterum	dip1	>CADEPI010000701.1 Cloeon dipterum genome assembly, contig: clodip2_s0701, whole genome shotgun sequence	1	32865
Cloeon dipterum	dip1	>CADEPI010000702.1 Cloeon dipterum genome assembly, contig: clodip2_s0702, whole genome shotgun sequence	1	16567
Cloeon dipterum	dip1	>CADEPI010000705.1 Cloeon dipterum genome assembly, contig: clodip2_s0705, whole genome shotgun sequence	18931	32016
Cloeon dipterum	dip1	>CADEPI010000706.1 Cloeon dipterum genome assembly, contig: clodip2_s0706, whole genome shotgun sequence	1	31861
Cloeon dipterum	dip1	>CADEPI010000707.1 Cloeon dipterum genome assembly, contig: clodip2_s0707, whole genome shotgun sequence	1	31804
Cloeon dipterum	dip1	>CADEPI010000708.1 Cloeon dipterum genome assembly, contig: clodip2_s0708, whole genome shotgun sequence	1	23246
Cloeon dipterum	dip1	>CADEPI010000708.1 Cloeon dipterum genome assembly, contig: clodip2_s0708, whole genome shotgun sequence	23247	31743
Cloeon dipterum	dip1	>CADEPI010000709.1 Cloeon dipterum genome assembly, contig: clodip2_s0709, whole genome shotgun sequence	1	31484
Cloeon dipterum	dip1	>CADEPI010000710.1 Cloeon dipterum genome assembly, contig: clodip2_s0710, whole genome shotgun sequence	1	31443
Cloeon dipterum	dip1	>CADEPI010000711.1 Cloeon dipterum genome assembly, contig: clodip2_s0711, whole genome shotgun sequence	1	28573
Cloeon dipterum	dip1	>CADEPI010000715.1 Cloeon dipterum genome assembly, contig: clodip2_s0715, whole genome shotgun sequence	3397	30935
Cloeon dipterum	dip1	>CADEPI010000716.1 Cloeon dipterum genome assembly, contig: clodip2_s0716, whole genome shotgun sequence	1	30898
Cloeon dipterum	dip1	>CADEPI010000717.1 Cloeon dipterum genome assembly, contig: clodip2_s0717, whole genome shotgun sequence	1	30892
Cloeon dipterum	dip1	>CADEPI010000718.1 Cloeon dipterum genome assembly, contig: clodip2_s0718, whole genome shotgun sequence	1	10668
Cloeon dipterum	dip1	>CADEPI010000731.1 Cloeon dipterum genome assembly, contig: clodip2_s0731, whole genome shotgun sequence	13525	30037
Cloeon dipterum	dip1	>CADEPI010000732.1 Cloeon dipterum genome assembly, contig: clodip2_s0732, whole genome shotgun sequence	1	29697
Cloeon dipterum	dip1	>CADEPI010000733.1 Cloeon dipterum genome assembly, contig: clodip2_s0733, whole genome shotgun sequence	1	29646
Cloeon dipterum	dip1	>CADEPI010000734.1 Cloeon dipterum genome assembly, contig: clodip2_s0734, whole genome shotgun sequence	1	24141
Cloeon dipterum	dip1	>CADEPI010000734.1 Cloeon dipterum genome assembly, contig: clodip2_s0734, whole genome shotgun sequence	24142	29363
Cloeon dipterum	dip1	>CADEPI010000735.1 Cloeon dipterum genome assembly, contig: clodip2_s0735, whole genome shotgun sequence	1	29334
Cloeon dipterum	dip1	>CADEPI010000736.1 Cloeon dipterum genome assembly, contig: clodip2_s0736, whole genome shotgun sequence	1	28994
Cloeon dipterum	dip1	>CADEPI010000737.1 Cloeon dipterum genome assembly, contig: clodip2_s0737, whole genome shotgun sequence	1	28994
Cloeon dipterum	dip1	>CADEPI010000738.1 Cloeon dipterum genome assembly, contig: clodip2_s0738, whole genome shotgun sequence	1	7452
Cloeon dipterum	dip1	>CADEPI010000738.1 Cloeon dipterum genome assembly, contig: clodip2_s0738, whole genome shotgun sequence	7453	28770
Cloeon dipterum	dip1	>CADEPI010000739.1 Cloeon dipterum genome assembly, contig: clodip2_s0739, whole genome shotgun sequence	1	28747
Cloeon dipterum	dip1	>CADEPI010000740.1 Cloeon dipterum genome assembly, contig: clodip2_s0740, whole genome shotgun sequence	1	28636
Cloeon dipterum	dip1	>CADEPI010000741.1 Cloeon dipterum genome assembly, contig: clodip2_s0741, whole genome shotgun sequence	21297	28546
Cloeon dipterum	dip1	>CADEPI010000741.1 Cloeon dipterum genome assembly, contig: clodip2_s0741, whole genome shotgun sequence	1	21296
Cloeon dipterum	dip1	>CADEPI010000742.1 Cloeon dipterum genome assembly, contig: clodip2_s0742, whole genome shotgun sequence	1	28304
Cloeon dipterum	dip1	>CADEPI010000743.1 Cloeon dipterum genome assembly, contig: clodip2_s0743, whole genome shotgun sequence	1	28286
Cloeon dipterum	dip1	>CADEPI010000744.1 Cloeon dipterum genome assembly, contig: clodip2_s0744, whole genome shotgun sequence	1	28104
Cloeon dipterum	dip1	>CADEPI010000745.1 Cloeon dipterum genome assembly, contig: clodip2_s0745, whole genome shotgun sequence	1	8052
Cloeon dipterum	dip1	>CADEPI010000745.1 Cloeon dipterum genome assembly, contig: clodip2_s0745, whole genome shotgun sequence	8053	28101
Cloeon dipterum	dip1	>CADEPI010000746.1 Cloeon dipterum genome assembly, contig: clodip2_s0746, whole genome shotgun sequence	1	28050
Cloeon dipterum	dip1	>CADEPI010000747.1 Cloeon dipterum genome assembly, contig: clodip2_s0747, whole genome shotgun sequence	1	27917
Cloeon dipterum	dip1	>CADEPI010000748.1 Cloeon dipterum genome assembly, contig: clodip2_s0748, whole genome shotgun sequence	1	23981
Cloeon dipterum	dip1	>CADEPI010000760.1 Cloeon dipterum genome assembly, contig: clodip2_s0760, whole genome shotgun sequence	1390	26011
Cloeon dipterum	dip1	>CADEPI010000761.1 Cloeon dipterum genome assembly, contig: clodip2_s0761, whole genome shotgun sequence	1	25940
Cloeon dipterum	dip1	>CADEPI010000762.1 Cloeon dipterum genome assembly, contig: clodip2_s0762, whole genome shotgun sequence	1	25723
Cloeon dipterum	dip1	>CADEPI010000763.1 Cloeon dipterum genome assembly, contig: clodip2_s0763, whole genome shotgun sequence	1	23712
Cloeon dipterum	dip1	>CADEPI010000767.1 Cloeon dipterum genome assembly, contig: clodip2_s0767, whole genome shotgun sequence	21510	25473
Cloeon dipterum	dip1	>CADEPI010000768.1 Cloeon dipterum genome assembly, contig: clodip2_s0768, whole genome shotgun sequence	1	25405
Cloeon dipterum	dip1	>CADEPI010000769.1 Cloeon dipterum genome assembly, contig: clodip2_s0769, whole genome shotgun sequence	1	25249
Cloeon dipterum	dip1	>CADEPI010000770.1 Cloeon dipterum genome assembly, contig: clodip2_s0770, whole genome shotgun sequence	1	25100
Cloeon dipterum	dip1	>CADEPI010000771.1 Cloeon dipterum genome assembly, contig: clodip2_s0771, whole genome shotgun sequence	1	20278
Cloeon dipterum	dip1	>CADEPI010000771.1 Cloeon dipterum genome assembly, contig: clodip2_s0771, whole genome shotgun sequence	20279	25024
Cloeon dipterum	dip1	>CADEPI010000772.1 Cloeon dipterum genome assembly, contig: clodip2_s0772, whole genome shotgun sequence	1	24955
Cloeon dipterum	dip1	>CADEPI010000773.1 Cloeon dipterum genome assembly, contig: clodip2_s0773, whole genome shotgun sequence	1	24916
Cloeon dipterum	dip1	>CADEPI010000774.1 Cloeon dipterum genome assembly, contig: clodip2_s0774, whole genome shotgun sequence	1	24874
Cloeon dipterum	dip1	>CADEPI010000775.1 Cloeon dipterum genome assembly, contig: clodip2_s0775, whole genome shotgun sequence	20506	24673
Cloeon dipterum	dip1	>CADEPI010000775.1 Cloeon dipterum genome assembly, contig: clodip2_s0775, whole genome shotgun sequence	1	20505
Cloeon dipterum	dip1	>CADEPI010000776.1 Cloeon dipterum genome assembly, contig: clodip2_s0776, whole genome shotgun sequence	1	24659
Cloeon dipterum	dip1	>CADEPI010000777.1 Cloeon dipterum genome assembly, contig: clodip2_s0777, whole genome shotgun sequence	1	24537
Cloeon dipterum	dip1	>CADEPI010000778.1 Cloeon dipterum genome assembly, contig: clodip2_s0778, whole genome shotgun sequence	1	24463
Cloeon dipterum	dip1	>CADEPI010000779.1 Cloeon dipterum genome assembly, contig: clodip2_s0779, whole genome shotgun sequence	22170	24456
Cloeon dipterum	dip1	>CADEPI010000779.1 Cloeon dipterum genome assembly, contig: clodip2_s0779, whole genome shotgun sequence	1	22169
Cloeon dipterum	dip1	>CADEPI010000780.1 Cloeon dipterum genome assembly, contig: clodip2_s0780, whole genome shotgun sequence	1	24335
Cloeon dipterum	dip1	>CADEPI010000781.1 Cloeon dipterum genome assembly, contig: clodip2_s0781, whole genome shotgun sequence	1	24273
Cloeon dipterum	dip1	>CADEPI010000782.1 Cloeon dipterum genome assembly, contig: clodip2_s0782, whole genome shotgun sequence	1	24248
Cloeon dipterum	dip1	>CADEPI010000783.1 Cloeon dipterum genome assembly, contig: clodip2_s0783, whole genome shotgun sequence	1	24130
Cloeon dipterum	dip1	>CADEPI010000784.1 Cloeon dipterum genome assembly, contig: clodip2_s0784, whole genome shotgun sequence	723	24026
Cloeon dipterum	dip1	>CADEPI010000784.1 Cloeon dipterum genome assembly, contig: clodip2_s0784, whole genome shotgun sequence	1	722
Cloeon dipterum	dip1	>CADEPI010000785.1 Cloeon dipterum genome assembly, contig: clodip2_s0785, whole genome shotgun sequence	1	23941
Cloeon dipterum	dip1	>CADEPI010000786.1 Cloeon dipterum genome assembly, contig: clodip2_s0786, whole genome shotgun sequence	1	23940
Cloeon dipterum	dip1	>CADEPI010000787.1 Cloeon dipterum genome assembly, contig: clodip2_s0787, whole genome shotgun sequence	1	23837
Cloeon dipterum	dip1	>CADEPI010000788.1 Cloeon dipterum genome assembly, contig: clodip2_s0788, whole genome shotgun sequence	1	4974
Cloeon dipterum	dip1	>CADEPI010000788.1 Cloeon dipterum genome assembly, contig: clodip2_s0788, whole genome shotgun sequence	4975	23754
Cloeon dipterum	dip1	>CADEPI010000789.1 Cloeon dipterum genome assembly, contig: clodip2_s0789, whole genome shotgun sequence	1	23662
Cloeon dipterum	dip1	>CADEPI010000790.1 Cloeon dipterum genome assembly, contig: clodip2_s0790, whole genome shotgun sequence	1	23531
Cloeon dipterum	dip1	>CADEPI010000791.1 Cloeon dipterum genome assembly, contig: clodip2_s0791, whole genome shotgun sequence	1	23410
Cloeon dipterum	dip1	>CADEPI010000792.1 Cloeon dipterum genome assembly, contig: clodip2_s0792, whole genome shotgun sequence	10614	23254
Cloeon dipterum	dip1	>CADEPI010000792.1 Cloeon dipterum genome assembly, contig: clodip2_s0792, whole genome shotgun sequence	1	10613
Cloeon dipterum	dip1	>CADEPI010000793.1 Cloeon dipterum genome assembly, contig: clodip2_s0793, whole genome shotgun sequence	1	23116
Cloeon dipterum	dip1	>CADEPI010000794.1 Cloeon dipterum genome assembly, contig: clodip2_s0794, whole genome shotgun sequence	1	22987
Cloeon dipterum	dip1	>CADEPI010000795.1 Cloeon dipterum genome assembly, contig: clodip2_s0795, whole genome shotgun sequence	1	22939
Cloeon dipterum	dip1	>CADEPI010000796.1 Cloeon dipterum genome assembly, contig: clodip2_s0796, whole genome shotgun sequence	18314	22865
Cloeon dipterum	dip1	>CADEPI010000796.1 Cloeon dipterum genome assembly, contig: clodip2_s0796, whole genome shotgun sequence	1	18313
Cloeon dipterum	dip1	>CADEPI010000797.1 Cloeon dipterum genome assembly, contig: clodip2_s0797, whole genome shotgun sequence	1	22764
Cloeon dipterum	dip1	>CADEPI010000798.1 Cloeon dipterum genome assembly, contig: clodip2_s0798, whole genome shotgun sequence	1	22662
Cloeon dipterum	dip1	>CADEPI010000799.1 Cloeon dipterum genome assembly, contig: clodip2_s0799, whole genome shotgun sequence	1	22638
Cloeon dipterum	dip1	>CADEPI010000800.1 Cloeon dipterum genome assembly, contig: clodip2_s0800, whole genome shotgun sequence	1	22632
Cloeon dipterum	dip1	>CADEPI010000801.1 Cloeon dipterum genome assembly, contig: clodip2_s0801, whole genome shotgun sequence	1	4747
Cloeon dipterum	dip1	>CADEPI010000805.1 Cloeon dipterum genome assembly, contig: clodip2_s0805, whole genome shotgun sequence	15089	22262
Cloeon dipterum	dip1	>CADEPI010000806.1 Cloeon dipterum genome assembly, contig: clodip2_s0806, whole genome shotgun sequence	1	22251
Cloeon dipterum	dip1	>CADEPI010000807.1 Cloeon dipterum genome assembly, contig: clodip2_s0807, whole genome shotgun sequence	1	22142
Cloeon dipterum	dip1	>CADEPI010000808.1 Cloeon dipterum genome assembly, contig: clodip2_s0808, whole genome shotgun sequence	1	21908
Cloeon dipterum	dip1	>CADEPI010000809.1 Cloeon dipterum genome assembly, contig: clodip2_s0809, whole genome shotgun sequence	1	21843
Cloeon dipterum	dip1	>CADEPI010000810.1 Cloeon dipterum genome assembly, contig: clodip2_s0810, whole genome shotgun sequence	1	4677
Cloeon dipterum	dip1	>CADEPI010000814.1 Cloeon dipterum genome assembly, contig: clodip2_s0814, whole genome shotgun sequence	18449	21296
Cloeon dipterum	dip1	>CADEPI010000815.1 Cloeon dipterum genome assembly, contig: clodip2_s0815, whole genome shotgun sequence	1	21220
Cloeon dipterum	dip1	>CADEPI010000816.1 Cloeon dipterum genome assembly, contig: clodip2_s0816, whole genome shotgun sequence	1	21217
Cloeon dipterum	dip1	>CADEPI010000817.1 Cloeon dipterum genome assembly, contig: clodip2_s0817, whole genome shotgun sequence	1	21087
Cloeon dipterum	dip1	>CADEPI010000818.1 Cloeon dipterum genome assembly, contig: clodip2_s0818, whole genome shotgun sequence	1	21061
Cloeon dipterum	dip1	>CADEPI010000819.1 Cloeon dipterum genome assembly, contig: clodip2_s0819, whole genome shotgun sequence	1	12562
Cloeon dipterum	dip1	>CADEPI010000824.1 Cloeon dipterum genome assembly, contig: clodip2_s0824, whole genome shotgun sequence	8747	20584
Cloeon dipterum	dip1	>CADEPI010000825.1 Cloeon dipterum genome assembly, contig: clodip2_s0825, whole genome shotgun sequence	1	20507
Cloeon dipterum	dip1	>CADEPI010000826.1 Cloeon dipterum genome assembly, contig: clodip2_s0826, whole genome shotgun sequence	1	20481
Cloeon dipterum	dip1	>CADEPI010000827.1 Cloeon dipterum genome assembly, contig: clodip2_s0827, whole genome shotgun sequence	1	20395
Cloeon dipterum	dip1	>CADEPI010000828.1 Cloeon dipterum genome assembly, contig: clodip2_s0828, whole genome shotgun sequence	1	20348
Cloeon dipterum	dip1	>CADEPI010000829.1 Cloeon dipterum genome assembly, contig: clodip2_s0829, whole genome shotgun sequence	1	6426
Cloeon dipterum	dip1	>CADEPI010000829.1 Cloeon dipterum genome assembly, contig: clodip2_s0829, whole genome shotgun sequence	6427	20164
Cloeon dipterum	dip1	>CADEPI010000830.1 Cloeon dipterum genome assembly, contig: clodip2_s0830, whole genome shotgun sequence	1	20112
Cloeon dipterum	dip1	>CADEPI010000831.1 Cloeon dipterum genome assembly, contig: clodip2_s0831, whole genome shotgun sequence	1	20110
Cloeon dipterum	dip1	>CADEPI010000832.1 Cloeon dipterum genome assembly, contig: clodip2_s0832, whole genome shotgun sequence	1	20071
Cloeon dipterum	dip1	>CADEPI010000833.1 Cloeon dipterum genome assembly, contig: clodip2_s0833, whole genome shotgun sequence	1	19961
Cloeon dipterum	dip1	>CADEPI010000834.1 Cloeon dipterum genome assembly, contig: clodip2_s0834, whole genome shotgun sequence	1	6003
Cloeon dipterum	dip1	>CADEPI010000839.1 Cloeon dipterum genome assembly, contig: clodip2_s0839, whole genome shotgun sequence	6870	19663
Cloeon dipterum	dip1	>CADEPI010000840.1 Cloeon dipterum genome assembly, contig: clodip2_s0840, whole genome shotgun sequence	1	19559
Cloeon dipterum	dip1	>CADEPI010000841.1 Cloeon dipterum genome assembly, contig: clodip2_s0841, whole genome shotgun sequence	1	19476
Cloeon dipterum	dip1	>CADEPI010000842.1 Cloeon dipterum genome assembly, contig: clodip2_s0842, whole genome shotgun sequence	1	19384
Cloeon dipterum	dip1	>CADEPI010000843.1 Cloeon dipterum genome assembly, contig: clodip2_s0843, whole genome shotgun sequence	1	19240
Cloeon dipterum	dip1	>CADEPI010000844.1 Cloeon dipterum genome assembly, contig: clodip2_s0844, whole genome shotgun sequence	9543	19181
Cloeon dipterum	dip1	>CADEPI010000844.1 Cloeon dipterum genome assembly, contig: clodip2_s0844, whole genome shotgun sequence	1	9542
Cloeon dipterum	dip1	>CADEPI010000845.1 Cloeon dipterum genome assembly, contig: clodip2_s0845, whole genome shotgun sequence	1	19147
Cloeon dipterum	dip1	>CADEPI010000846.1 Cloeon dipterum genome assembly, contig: clodip2_s0846, whole genome shotgun sequence	1	19131
Cloeon dipterum	dip1	>CADEPI010000847.1 Cloeon dipterum genome assembly, contig: clodip2_s0847, whole genome shotgun sequence	1	19104
Cloeon dipterum	dip1	>CADEPI010000848.1 Cloeon dipterum genome assembly, contig: clodip2_s0848, whole genome shotgun sequence	1	19097
Cloeon dipterum	dip1	>CADEPI010000849.1 Cloeon dipterum genome assembly, contig: clodip2_s0849, whole genome shotgun sequence	13878	19067
Cloeon dipterum	dip1	>CADEPI010000849.1 Cloeon dipterum genome assembly, contig: clodip2_s0849, whole genome shotgun sequence	1	13877
Cloeon dipterum	dip1	>CADEPI010000850.1 Cloeon dipterum genome assembly, contig: clodip2_s0850, whole genome shotgun sequence	1	18984
Cloeon dipterum	dip1	>CADEPI010000851.1 Cloeon dipterum genome assembly, contig: clodip2_s0851, whole genome shotgun sequence	1	18954
Cloeon dipterum	dip1	>CADEPI010000852.1 Cloeon dipterum genome assembly, contig: clodip2_s0852, whole genome shotgun sequence	1	18913
Cloeon dipterum	dip1	>CADEPI010000853.1 Cloeon dipterum genome assembly, contig: clodip2_s0853, whole genome shotgun sequence	1	18875
Cloeon dipterum	dip1	>CADEPI010000854.1 Cloeon dipterum genome assembly, contig: clodip2_s0854, whole genome shotgun sequence	1	18847
Cloeon dipterum	dip1	>CADEPI010000855.1 Cloeon dipterum genome assembly, contig: clodip2_s0855, whole genome shotgun sequence	1	231
Cloeon dipterum	dip1	>CADEPI010000855.1 Cloeon dipterum genome assembly, contig: clodip2_s0855, whole genome shotgun sequence	232	18770
Cloeon dipterum	dip1	>CADEPI010000856.1 Cloeon dipterum genome assembly, contig: clodip2_s0856, whole genome shotgun sequence	1	18736
Cloeon dipterum	dip1	>CADEPI010000857.1 Cloeon dipterum genome assembly, contig: clodip2_s0857, whole genome shotgun sequence	1	18733
Cloeon dipterum	dip1	>CADEPI010000858.1 Cloeon dipterum genome assembly, contig: clodip2_s0858, whole genome shotgun sequence	1	18723
Cloeon dipterum	dip1	>CADEPI010000859.1 Cloeon dipterum genome assembly, contig: clodip2_s0859, whole genome shotgun sequence	1	18712
Cloeon dipterum	dip1	>CADEPI010000860.1 Cloeon dipterum genome assembly, contig: clodip2_s0860, whole genome shotgun sequence	6553	18653
Cloeon dipterum	dip1	>CADEPI010000860.1 Cloeon dipterum genome assembly, contig: clodip2_s0860, whole genome shotgun sequence	1	6552
Cloeon dipterum	dip1	>CADEPI010000861.1 Cloeon dipterum genome assembly, contig: clodip2_s0861, whole genome shotgun sequence	1	18649
Cloeon dipterum	dip1	>CADEPI010000862.1 Cloeon dipterum genome assembly, contig: clodip2_s0862, whole genome shotgun sequence	1	18627
Cloeon dipterum	dip1	>CADEPI010000863.1 Cloeon dipterum genome assembly, contig: clodip2_s0863, whole genome shotgun sequence	1	18604
Cloeon dipterum	dip1	>CADEPI010000864.1 Cloeon dipterum genome assembly, contig: clodip2_s0864, whole genome shotgun sequence	1	18516
Cloeon dipterum	dip1	>CADEPI010000865.1 Cloeon dipterum genome assembly, contig: clodip2_s0865, whole genome shotgun sequence	1	13498
Cloeon dipterum	dip1	>CADEPI010000865.1 Cloeon dipterum genome assembly, contig: clodip2_s0865, whole genome shotgun sequence	13499	18451
Cloeon dipterum	dip1	>CADEPI010000866.1 Cloeon dipterum genome assembly, contig: clodip2_s0866, whole genome shotgun sequence	1	18384
Cloeon dipterum	dip1	>CADEPI010000867.1 Cloeon dipterum genome assembly, contig: clodip2_s0867, whole genome shotgun sequence	1	18379
Cloeon dipterum	dip1	>CADEPI010000868.1 Cloeon dipterum genome assembly, contig: clodip2_s0868, whole genome shotgun sequence	1	18351
Cloeon dipterum	dip1	>CADEPI010000869.1 Cloeon dipterum genome assembly, contig: clodip2_s0869, whole genome shotgun sequence	1	18196
Cloeon dipterum	dip1	>CADEPI010000870.1 Cloeon dipterum genome assembly, contig: clodip2_s0870, whole genome shotgun sequence	1	18149
Cloeon dipterum	dip1	>CADEPI010000871.1 Cloeon dipterum genome assembly, contig: clodip2_s0871, whole genome shotgun sequence	3583	18133
Cloeon dipterum	dip1	>CADEPI010000871.1 Cloeon dipterum genome assembly, contig: clodip2_s0871, whole genome shotgun sequence	1	3582
Cloeon dipterum	dip1	>CADEPI010000872.1 Cloeon dipterum genome assembly, contig: clodip2_s0872, whole genome shotgun sequence	1	18124
Cloeon dipterum	dip1	>CADEPI010000873.1 Cloeon dipterum genome assembly, contig: clodip2_s0873, whole genome shotgun sequence	1	18052
Cloeon dipterum	dip1	>CADEPI010000874.1 Cloeon dipterum genome assembly, contig: clodip2_s0874, whole genome shotgun sequence	1	18016
Cloeon dipterum	dip1	>CADEPI010000875.1 Cloeon dipterum genome assembly, contig: clodip2_s0875, whole genome shotgun sequence	1	17863
Cloeon dipterum	dip1	>CADEPI010000876.1 Cloeon dipterum genome assembly, contig: clodip2_s0876, whole genome shotgun sequence	13390	17862
Cloeon dipterum	dip1	>CADEPI010000876.1 Cloeon dipterum genome assembly, contig: clodip2_s0876, whole genome shotgun sequence	1	13389
Cloeon dipterum	dip1	>CADEPI010000877.1 Cloeon dipterum genome assembly, contig: clodip2_s0877, whole genome shotgun sequence	1	17830
Cloeon dipterum	dip1	>CADEPI010000878.1 Cloeon dipterum genome assembly, contig: clodip2_s0878, whole genome shotgun sequence	1	17637
Cloeon dipterum	dip1	>CADEPI010000879.1 Cloeon dipterum genome assembly, contig: clodip2_s0879, whole genome shotgun sequence	1	17606
Cloeon dipterum	dip1	>CADEPI010000880.1 Cloeon dipterum genome assembly, contig: clodip2_s0880, whole genome shotgun sequence	1	17518
Cloeon dipterum	dip1	>CADEPI010000881.1 Cloeon dipterum genome assembly, contig: clodip2_s0881, whole genome shotgun sequence	1	17373
Cloeon dipterum	dip1	>CADEPI010000882.1 Cloeon dipterum genome assembly, contig: clodip2_s0882, whole genome shotgun sequence	1	7557
Cloeon dipterum	dip1	>CADEPI010000882.1 Cloeon dipterum genome assembly, contig: clodip2_s0882, whole genome shotgun sequence	7558	17365
Cloeon dipterum	dip1	>CADEPI010000883.1 Cloeon dipterum genome assembly, contig: clodip2_s0883, whole genome shotgun sequence	1	17348
Cloeon dipterum	dip1	>CADEPI010000884.1 Cloeon dipterum genome assembly, contig: clodip2_s0884, whole genome shotgun sequence	1	17344
Cloeon dipterum	dip1	>CADEPI010000885.1 Cloeon dipterum genome assembly, contig: clodip2_s0885, whole genome shotgun sequence	1	17183
Cloeon dipterum	dip1	>CADEPI010000886.1 Cloeon dipterum genome assembly, contig: clodip2_s0886, whole genome shotgun sequence	1	17167
Cloeon dipterum	dip1	>CADEPI010000887.1 Cloeon dipterum genome assembly, contig: clodip2_s0887, whole genome shotgun sequence	1	17145
Cloeon dipterum	dip1	>CADEPI010000888.1 Cloeon dipterum genome assembly, contig: clodip2_s0888, whole genome shotgun sequence	1	3999
Cloeon dipterum	dip1	>CADEPI010000888.1 Cloeon dipterum genome assembly, contig: clodip2_s0888, whole genome shotgun sequence	4000	17136
Cloeon dipterum	dip1	>CADEPI010000889.1 Cloeon dipterum genome assembly, contig: clodip2_s0889, whole genome shotgun sequence	1	17122
Cloeon dipterum	dip1	>CADEPI010000890.1 Cloeon dipterum genome assembly, contig: clodip2_s0890, whole genome shotgun sequence	1	17061
Cloeon dipterum	dip1	>CADEPI010000891.1 Cloeon dipterum genome assembly, contig: clodip2_s0891, whole genome shotgun sequence	1	16909
Cloeon dipterum	dip1	>CADEPI010000892.1 Cloeon dipterum genome assembly, contig: clodip2_s0892, whole genome shotgun sequence	1	16872
Cloeon dipterum	dip1	>CADEPI010000893.1 Cloeon dipterum genome assembly, contig: clodip2_s0893, whole genome shotgun sequence	1	16845
Cloeon dipterum	dip1	>CADEPI010000894.1 Cloeon dipterum genome assembly, contig: clodip2_s0894, whole genome shotgun sequence	1	2048
Cloeon dipterum	dip1	>CADEPI010000900.1 Cloeon dipterum genome assembly, contig: clodip2_s0900, whole genome shotgun sequence	1727	16506
Cloeon dipterum	dip1	>CADEPI010000901.1 Cloeon dipterum genome assembly, contig: clodip2_s0901, whole genome shotgun sequence	1	16457
Cloeon dipterum	dip1	>CADEPI010000902.1 Cloeon dipterum genome assembly, contig: clodip2_s0902, whole genome shotgun sequence	1	16435
Cloeon dipterum	dip1	>CADEPI010000903.1 Cloeon dipterum genome assembly, contig: clodip2_s0903, whole genome shotgun sequence	1	16376
Cloeon dipterum	dip1	>CADEPI010000904.1 Cloeon dipterum genome assembly, contig: clodip2_s0904, whole genome shotgun sequence	1	16307
Cloeon dipterum	dip1	>CADEPI010000905.1 Cloeon dipterum genome assembly, contig: clodip2_s0905, whole genome shotgun sequence	1	16215
Cloeon dipterum	dip1	>CADEPI010000906.1 Cloeon dipterum genome assembly, contig: clodip2_s0906, whole genome shotgun sequence	3425	16208
Cloeon dipterum	dip1	>CADEPI010000906.1 Cloeon dipterum genome assembly, contig: clodip2_s0906, whole genome shotgun sequence	1	3424
Cloeon dipterum	dip1	>CADEPI010000907.1 Cloeon dipterum genome assembly, contig: clodip2_s0907, whole genome shotgun sequence	1	16177
Cloeon dipterum	dip1	>CADEPI010000908.1 Cloeon dipterum genome assembly, contig: clodip2_s0908, whole genome shotgun sequence	1	16151
Cloeon dipterum	dip1	>CADEPI010000909.1 Cloeon dipterum genome assembly, contig: clodip2_s0909, whole genome shotgun sequence	1	16097
Cloeon dipterum	dip1	>CADEPI010000910.1 Cloeon dipterum genome assembly, contig: clodip2_s0910, whole genome shotgun sequence	1	16043
Cloeon dipterum	dip1	>CADEPI010000911.1 Cloeon dipterum genome assembly, contig: clodip2_s0911, whole genome shotgun sequence	1	15987
Cloeon dipterum	dip1	>CADEPI010000912.1 Cloeon dipterum genome assembly, contig: clodip2_s0912, whole genome shotgun sequence	1	6755
Cloeon dipterum	dip1	>CADEPI010000912.1 Cloeon dipterum genome assembly, contig: clodip2_s0912, whole genome shotgun sequence	6756	15968
Cloeon dipterum	dip1	>CADEPI010000913.1 Cloeon dipterum genome assembly, contig: clodip2_s0913, whole genome shotgun sequence	1	15898
Cloeon dipterum	dip1	>CADEPI010000914.1 Cloeon dipterum genome assembly, contig: clodip2_s0914, whole genome shotgun sequence	1	15817
Cloeon dipterum	dip1	>CADEPI010000915.1 Cloeon dipterum genome assembly, contig: clodip2_s0915, whole genome shotgun sequence	1	15558
Cloeon dipterum	dip1	>CADEPI010000916.1 Cloeon dipterum genome assembly, contig: clodip2_s0916, whole genome shotgun sequence	1	15536
Cloeon dipterum	dip1	>CADEPI010000917.1 Cloeon dipterum genome assembly, contig: clodip2_s0917, whole genome shotgun sequence	1	15451
Cloeon dipterum	dip1	>CADEPI010000918.1 Cloeon dipterum genome assembly, contig: clodip2_s0918, whole genome shotgun sequence	12522	15443
Cloeon dipterum	dip1	>CADEPI010000918.1 Cloeon dipterum genome assembly, contig: clodip2_s0918, whole genome shotgun sequence	1	12521
Cloeon dipterum	dip1	>CADEPI010000919.1 Cloeon dipterum genome assembly, contig: clodip2_s0919, whole genome shotgun sequence	1	15432
Cloeon dipterum	dip1	>CADEPI010000920.1 Cloeon dipterum genome assembly, contig: clodip2_s0920, whole genome shotgun sequence	1	15357
Cloeon dipterum	dip1	>CADEPI010000921.1 Cloeon dipterum genome assembly, contig: clodip2_s0921, whole genome shotgun sequence	1	15353
Cloeon dipterum	dip1	>CADEPI010000922.1 Cloeon dipterum genome assembly, contig: clodip2_s0922, whole genome shotgun sequence	1	15294
Cloeon dipterum	dip1	>CADEPI010000923.1 Cloeon dipterum genome assembly, contig: clodip2_s0923, whole genome shotgun sequence	1	15263
Cloeon dipterum	dip1	>CADEPI010000924.1 Cloeon dipterum genome assembly, contig: clodip2_s0924, whole genome shotgun sequence	1	15244
Cloeon dipterum	dip1	>CADEPI010000925.1 Cloeon dipterum genome assembly, contig: clodip2_s0925, whole genome shotgun sequence	1	5128
Cloeon dipterum	dip1	>CADEPI010000932.1 Cloeon dipterum genome assembly, contig: clodip2_s0932, whole genome shotgun sequence	211	14682
Cloeon dipterum	dip1	>CADEPI010000933.1 Cloeon dipterum genome assembly, contig: clodip2_s0933, whole genome shotgun sequence	1	14652
Cloeon dipterum	dip1	>CADEPI010000934.1 Cloeon dipterum genome assembly, contig: clodip2_s0934, whole genome shotgun sequence	1	14604
Cloeon dipterum	dip1	>CADEPI010000935.1 Cloeon dipterum genome assembly, contig: clodip2_s0935, whole genome shotgun sequence	1	14538
Cloeon dipterum	dip1	>CADEPI010000936.1 Cloeon dipterum genome assembly, contig: clodip2_s0936, whole genome shotgun sequence	1	14482
Cloeon dipterum	dip1	>CADEPI010000937.1 Cloeon dipterum genome assembly, contig: clodip2_s0937, whole genome shotgun sequence	1	14403
Cloeon dipterum	dip1	>CADEPI010000938.1 Cloeon dipterum genome assembly, contig: clodip2_s0938, whole genome shotgun sequence	1	12843
Cloeon dipterum	dip1	>CADEPI010000938.1 Cloeon dipterum genome assembly, contig: clodip2_s0938, whole genome shotgun sequence	12844	14400
Cloeon dipterum	dip1	>CADEPI010000939.1 Cloeon dipterum genome assembly, contig: clodip2_s0939, whole genome shotgun sequence	1	14367
Cloeon dipterum	dip1	>CADEPI010000940.1 Cloeon dipterum genome assembly, contig: clodip2_s0940, whole genome shotgun sequence	1	14313
Cloeon dipterum	dip1	>CADEPI010000941.1 Cloeon dipterum genome assembly, contig: clodip2_s0941, whole genome shotgun sequence	1	14275
Cloeon dipterum	dip1	>CADEPI010000942.1 Cloeon dipterum genome assembly, contig: clodip2_s0942, whole genome shotgun sequence	1	14237
Cloeon dipterum	dip1	>CADEPI010000943.1 Cloeon dipterum genome assembly, contig: clodip2_s0943, whole genome shotgun sequence	1	14235
Cloeon dipterum	dip1	>CADEPI010000944.1 Cloeon dipterum genome assembly, contig: clodip2_s0944, whole genome shotgun sequence	1	14207
Cloeon dipterum	dip1	>CADEPI010000945.1 Cloeon dipterum genome assembly, contig: clodip2_s0945, whole genome shotgun sequence	12803	14200
Cloeon dipterum	dip1	>CADEPI010000945.1 Cloeon dipterum genome assembly, contig: clodip2_s0945, whole genome shotgun sequence	1	12802
Cloeon dipterum	dip1	>CADEPI010000946.1 Cloeon dipterum genome assembly, contig: clodip2_s0946, whole genome shotgun sequence	1	14139
Cloeon dipterum	dip1	>CADEPI010000947.1 Cloeon dipterum genome assembly, contig: clodip2_s0947, whole genome shotgun sequence	1	14039
Cloeon dipterum	dip1	>CADEPI010000948.1 Cloeon dipterum genome assembly, contig: clodip2_s0948, whole genome shotgun sequence	1	14039
Cloeon dipterum	dip1	>CADEPI010000949.1 Cloeon dipterum genome assembly, contig: clodip2_s0949, whole genome shotgun sequence	1	14028
Cloeon dipterum	dip1	>CADEPI010000950.1 Cloeon dipterum genome assembly, contig: clodip2_s0950, whole genome shotgun sequence	1	14004
Cloeon dipterum	dip1	>CADEPI010000951.1 Cloeon dipterum genome assembly, contig: clodip2_s0951, whole genome shotgun sequence	1	13984
Cloeon dipterum	dip1	>CADEPI010000952.1 Cloeon dipterum genome assembly, contig: clodip2_s0952, whole genome shotgun sequence	1	13955
Cloeon dipterum	dip1	>CADEPI010000953.1 Cloeon dipterum genome assembly, contig: clodip2_s0953, whole genome shotgun sequence	407	13879
Cloeon dipterum	dip1	>CADEPI010000953.1 Cloeon dipterum genome assembly, contig: clodip2_s0953, whole genome shotgun sequence	1	406
Cloeon dipterum	dip1	>CADEPI010000954.1 Cloeon dipterum genome assembly, contig: clodip2_s0954, whole genome shotgun sequence	1	13828
Cloeon dipterum	dip1	>CADEPI010000955.1 Cloeon dipterum genome assembly, contig: clodip2_s0955, whole genome shotgun sequence	1	13819
Cloeon dipterum	dip1	>CADEPI010000956.1 Cloeon dipterum genome assembly, contig: clodip2_s0956, whole genome shotgun sequence	1	13794
Cloeon dipterum	dip1	>CADEPI010000957.1 Cloeon dipterum genome assembly, contig: clodip2_s0957, whole genome shotgun sequence	1	13714
Cloeon dipterum	dip1	>CADEPI010000958.1 Cloeon dipterum genome assembly, contig: clodip2_s0958, whole genome shotgun sequence	1	13584
Cloeon dipterum	dip1	>CADEPI010000959.1 Cloeon dipterum genome assembly, contig: clodip2_s0959, whole genome shotgun sequence	1	13553
Cloeon dipterum	dip1	>CADEPI010000960.1 Cloeon dipterum genome assembly, contig: clodip2_s0960, whole genome shotgun sequence	1	4228
Cloeon dipterum	dip1	>CADEPI010000960.1 Cloeon dipterum genome assembly, contig: clodip2_s0960, whole genome shotgun sequence	4229	13546
Cloeon dipterum	dip1	>CADEPI010000961.1 Cloeon dipterum genome assembly, contig: clodip2_s0961, whole genome shotgun sequence	1	13518
Cloeon dipterum	dip1	>CADEPI010000962.1 Cloeon dipterum genome assembly, contig: clodip2_s0962, whole genome shotgun sequence	1	13514
Cloeon dipterum	dip1	>CADEPI010000963.1 Cloeon dipterum genome assembly, contig: clodip2_s0963, whole genome shotgun sequence	1	13480
Cloeon dipterum	dip1	>CADEPI010000964.1 Cloeon dipterum genome assembly, contig: clodip2_s0964, whole genome shotgun sequence	1	13470
Cloeon dipterum	dip1	>CADEPI010000965.1 Cloeon dipterum genome assembly, contig: clodip2_s0965, whole genome shotgun sequence	1	13346
Cloeon dipterum	dip1	>CADEPI010000966.1 Cloeon dipterum genome assembly, contig: clodip2_s0966, whole genome shotgun sequence	1	13321
Cloeon dipterum	dip1	>CADEPI010000967.1 Cloeon dipterum genome assembly, contig: clodip2_s0967, whole genome shotgun sequence	1	10026
Cloeon dipterum	dip1	>CADEPI010000967.1 Cloeon dipterum genome assembly, contig: clodip2_s0967, whole genome shotgun sequence	10027	13285
Cloeon dipterum	dip1	>CADEPI010000968.1 Cloeon dipterum genome assembly, contig: clodip2_s0968, whole genome shotgun sequence	1	13265
Cloeon dipterum	dip1	>CADEPI010000969.1 Cloeon dipterum genome assembly, contig: clodip2_s0969, whole genome shotgun sequence	1	13212
Cloeon dipterum	dip1	>CADEPI010000970.1 Cloeon dipterum genome assembly, contig: clodip2_s0970, whole genome shotgun sequence	1	13152
Cloeon dipterum	dip1	>CADEPI010000971.1 Cloeon dipterum genome assembly, contig: clodip2_s0971, whole genome shotgun sequence	1	13125
Cloeon dipterum	dip1	>CADEPI010000972.1 Cloeon dipterum genome assembly, contig: clodip2_s0972, whole genome shotgun sequence	1	13095
Cloeon dipterum	dip1	>CADEPI010000973.1 Cloeon dipterum genome assembly, contig: clodip2_s0973, whole genome shotgun sequence	1	13043
Cloeon dipterum	dip1	>CADEPI010000974.1 Cloeon dipterum genome assembly, contig: clodip2_s0974, whole genome shotgun sequence	1	13026
Cloeon dipterum	dip1	>CADEPI010000975.1 Cloeon dipterum genome assembly, contig: clodip2_s0975, whole genome shotgun sequence	1	4815
Cloeon dipterum	dip1	>CADEPI010000975.1 Cloeon dipterum genome assembly, contig: clodip2_s0975, whole genome shotgun sequence	4816	13020
Cloeon dipterum	dip1	>CADEPI010000976.1 Cloeon dipterum genome assembly, contig: clodip2_s0976, whole genome shotgun sequence	1	13002
Cloeon dipterum	dip1	>CADEPI010000977.1 Cloeon dipterum genome assembly, contig: clodip2_s0977, whole genome shotgun sequence	1	12988
Cloeon dipterum	dip1	>CADEPI010000978.1 Cloeon dipterum genome assembly, contig: clodip2_s0978, whole genome shotgun sequence	1	12960
Cloeon dipterum	dip1	>CADEPI010000979.1 Cloeon dipterum genome assembly, contig: clodip2_s0979, whole genome shotgun sequence	1	12943
Cloeon dipterum	dip1	>CADEPI010000980.1 Cloeon dipterum genome assembly, contig: clodip2_s0980, whole genome shotgun sequence	1	12937
Cloeon dipterum	dip1	>CADEPI010000981.1 Cloeon dipterum genome assembly, contig: clodip2_s0981, whole genome shotgun sequence	1	12909
Cloeon dipterum	dip1	>CADEPI010000982.1 Cloeon dipterum genome assembly, contig: clodip2_s0982, whole genome shotgun sequence	1	12887
Cloeon dipterum	dip1	>CADEPI010000983.1 Cloeon dipterum genome assembly, contig: clodip2_s0983, whole genome shotgun sequence	1162	12862
Cloeon dipterum	dip1	>CADEPI010000983.1 Cloeon dipterum genome assembly, contig: clodip2_s0983, whole genome shotgun sequence	1	1161
Cloeon dipterum	dip1	>CADEPI010000984.1 Cloeon dipterum genome assembly, contig: clodip2_s0984, whole genome shotgun sequence	1	12834
Cloeon dipterum	dip1	>CADEPI010000985.1 Cloeon dipterum genome assembly, contig: clodip2_s0985, whole genome shotgun sequence	1	12794
Cloeon dipterum	dip1	>CADEPI010000986.1 Cloeon dipterum genome assembly, contig: clodip2_s0986, whole genome shotgun sequence	1	12775
Cloeon dipterum	dip1	>CADEPI010000987.1 Cloeon dipterum genome assembly, contig: clodip2_s0987, whole genome shotgun sequence	1	12740
Cloeon dipterum	dip1	>CADEPI010000988.1 Cloeon dipterum genome assembly, contig: clodip2_s0988, whole genome shotgun sequence	1	12735
Cloeon dipterum	dip1	>CADEPI010000989.1 Cloeon dipterum genome assembly, contig: clodip2_s0989, whole genome shotgun sequence	1	12726
Cloeon dipterum	dip1	>CADEPI010000990.1 Cloeon dipterum genome assembly, contig: clodip2_s0990, whole genome shotgun sequence	1	11688
Cloeon dipterum	dip1	>CADEPI010000990.1 Cloeon dipterum genome assembly, contig: clodip2_s0990, whole genome shotgun sequence	11689	12708
Cloeon dipterum	dip1	>CADEPI010000991.1 Cloeon dipterum genome assembly, contig: clodip2_s0991, whole genome shotgun sequence	1	12685
Cloeon dipterum	dip1	>CADEPI010000992.1 Cloeon dipterum genome assembly, contig: clodip2_s0992, whole genome shotgun sequence	1	12652
Cloeon dipterum	dip1	>CADEPI010000993.1 Cloeon dipterum genome assembly, contig: clodip2_s0993, whole genome shotgun sequence	1	12603
Cloeon dipterum	dip1	>CADEPI010000994.1 Cloeon dipterum genome assembly, contig: clodip2_s0994, whole genome shotgun sequence	1	12585
Cloeon dipterum	dip1	>CADEPI010000995.1 Cloeon dipterum genome assembly, contig: clodip2_s0995, whole genome shotgun sequence	1	12580
Cloeon dipterum	dip1	>CADEPI010000996.1 Cloeon dipterum genome assembly, contig: clodip2_s0996, whole genome shotgun sequence	1	12510
Cloeon dipterum	dip1	>CADEPI010000997.1 Cloeon dipterum genome assembly, contig: clodip2_s0997, whole genome shotgun sequence	1	12463
Cloeon dipterum	dip1	>CADEPI010000998.1 Cloeon dipterum genome assembly, contig: clodip2_s0998, whole genome shotgun sequence	10895	12462
Cloeon dipterum	dip1	>CADEPI010000998.1 Cloeon dipterum genome assembly, contig: clodip2_s0998, whole genome shotgun sequence	1	10894
Cloeon dipterum	dip1	>CADEPI010000999.1 Cloeon dipterum genome assembly, contig: clodip2_s0999, whole genome shotgun sequence	1	12448
Cloeon dipterum	dip1	>CADEPI010001000.1 Cloeon dipterum genome assembly, contig: clodip2_s1000, whole genome shotgun sequence	1	12445
Cloeon dipterum	dip1	>CADEPI010001001.1 Cloeon dipterum genome assembly, contig: clodip2_s1001, whole genome shotgun sequence	1	12395
Cloeon dipterum	dip1	>CADEPI010001002.1 Cloeon dipterum genome assembly, contig: clodip2_s1002, whole genome shotgun sequence	1	12302
Cloeon dipterum	dip1	>CADEPI010001003.1 Cloeon dipterum genome assembly, contig: clodip2_s1003, whole genome shotgun sequence	1	12294
Cloeon dipterum	dip1	>CADEPI010001004.1 Cloeon dipterum genome assembly, contig: clodip2_s1004, whole genome shotgun sequence	1	12212
Cloeon dipterum	dip1	>CADEPI010001005.1 Cloeon dipterum genome assembly, contig: clodip2_s1005, whole genome shotgun sequence	1	12172
Cloeon dipterum	dip1	>CADEPI010001006.1 Cloeon dipterum genome assembly, contig: clodip2_s1006, whole genome shotgun sequence	1	12156
Cloeon dipterum	dip1	>CADEPI010001006.1 Cloeon dipterum genome assembly, contig: clodip2_s1006, whole genome shotgun sequence	12157	12170
Cloeon dipterum	dip1	>CADEPI010001007.1 Cloeon dipterum genome assembly, contig: clodip2_s1007, whole genome shotgun sequence	1	12126
Cloeon dipterum	dip1	>CADEPI010001008.1 Cloeon dipterum genome assembly, contig: clodip2_s1008, whole genome shotgun sequence	1	12077
Cloeon dipterum	dip1	>CADEPI010001009.1 Cloeon dipterum genome assembly, contig: clodip2_s1009, whole genome shotgun sequence	1	12056
Cloeon dipterum	dip1	>CADEPI010001010.1 Cloeon dipterum genome assembly, contig: clodip2_s1010, whole genome shotgun sequence	1	12013
Cloeon dipterum	dip1	>CADEPI010001011.1 Cloeon dipterum genome assembly, contig: clodip2_s1011, whole genome shotgun sequence	1	11988
Cloeon dipterum	dip1	>CADEPI010001012.1 Cloeon dipterum genome assembly, contig: clodip2_s1012, whole genome shotgun sequence	1	11930
Cloeon dipterum	dip1	>CADEPI010001013.1 Cloeon dipterum genome assembly, contig: clodip2_s1013, whole genome shotgun sequence	1	11867
Cloeon dipterum	dip1	>CADEPI010001014.1 Cloeon dipterum genome assembly, contig: clodip2_s1014, whole genome shotgun sequence	1	11866
Cloeon dipterum	dip1	>CADEPI010001015.1 Cloeon dipterum genome assembly, contig: clodip2_s1015, whole genome shotgun sequence	4055	11814
Cloeon dipterum	dip1	>CADEPI010001015.1 Cloeon dipterum genome assembly, contig: clodip2_s1015, whole genome shotgun sequence	1	4054
Cloeon dipterum	dip1	>CADEPI010001016.1 Cloeon dipterum genome assembly, contig: clodip2_s1016, whole genome shotgun sequence	1	11748
Cloeon dipterum	dip1	>CADEPI010001017.1 Cloeon dipterum genome assembly, contig: clodip2_s1017, whole genome shotgun sequence	1	11727
Cloeon dipterum	dip1	>CADEPI010001018.1 Cloeon dipterum genome assembly, contig: clodip2_s1018, whole genome shotgun sequence	1	11623
Cloeon dipterum	dip1	>CADEPI010001019.1 Cloeon dipterum genome assembly, contig: clodip2_s1019, whole genome shotgun sequence	1	11612
Cloeon dipterum	dip1	>CADEPI010001020.1 Cloeon dipterum genome assembly, contig: clodip2_s1020, whole genome shotgun sequence	1	11601
Cloeon dipterum	dip1	>CADEPI010001021.1 Cloeon dipterum genome assembly, contig: clodip2_s1021, whole genome shotgun sequence	1	11588
Cloeon dipterum	dip1	>CADEPI010001022.1 Cloeon dipterum genome assembly, contig: clodip2_s1022, whole genome shotgun sequence	1	11583
Cloeon dipterum	dip1	>CADEPI010001023.1 Cloeon dipterum genome assembly, contig: clodip2_s1023, whole genome shotgun sequence	1	10750
Cloeon dipterum	dip1	>CADEPI010001023.1 Cloeon dipterum genome assembly, contig: clodip2_s1023, whole genome shotgun sequence	10751	11546
Cloeon dipterum	dip1	>CADEPI010001024.1 Cloeon dipterum genome assembly, contig: clodip2_s1024, whole genome shotgun sequence	1	11415
Cloeon dipterum	dip1	>CADEPI010001025.1 Cloeon dipterum genome assembly, contig: clodip2_s1025, whole genome shotgun sequence	1	11399
Cloeon dipterum	dip1	>CADEPI010001026.1 Cloeon dipterum genome assembly, contig: clodip2_s1026, whole genome shotgun sequence	1	11321
Cloeon dipterum	dip1	>CADEPI010001027.1 Cloeon dipterum genome assembly, contig: clodip2_s1027, whole genome shotgun sequence	1	11160
Cloeon dipterum	dip1	>CADEPI010001028.1 Cloeon dipterum genome assembly, contig: clodip2_s1028, whole genome shotgun sequence	1	11111
Cloeon dipterum	dip1	>CADEPI010001029.1 Cloeon dipterum genome assembly, contig: clodip2_s1029, whole genome shotgun sequence	1	11095
Cloeon dipterum	dip1	>CADEPI010001030.1 Cloeon dipterum genome assembly, contig: clodip2_s1030, whole genome shotgun sequence	1	11047
Cloeon dipterum	dip1	>CADEPI010001031.1 Cloeon dipterum genome assembly, contig: clodip2_s1031, whole genome shotgun sequence	1	11025
Cloeon dipterum	dip1	>CADEPI010001032.1 Cloeon dipterum genome assembly, contig: clodip2_s1032, whole genome shotgun sequence	9623	11020
Cloeon dipterum	dip1	>CADEPI010001032.1 Cloeon dipterum genome assembly, contig: clodip2_s1032, whole genome shotgun sequence	1	9622
Cloeon dipterum	dip1	>CADEPI010001033.1 Cloeon dipterum genome assembly, contig: clodip2_s1033, whole genome shotgun sequence	1	10982
Cloeon dipterum	dip1	>CADEPI010001034.1 Cloeon dipterum genome assembly, contig: clodip2_s1034, whole genome shotgun sequence	1	10944
Cloeon dipterum	dip1	>CADEPI010001035.1 Cloeon dipterum genome assembly, contig: clodip2_s1035, whole genome shotgun sequence	1	10896
Cloeon dipterum	dip1	>CADEPI010001036.1 Cloeon dipterum genome assembly, contig: clodip2_s1036, whole genome shotgun sequence	1	10838
Cloeon dipterum	dip1	>CADEPI010001037.1 Cloeon dipterum genome assembly, contig: clodip2_s1037, whole genome shotgun sequence	1	10824
Cloeon dipterum	dip1	>CADEPI010001038.1 Cloeon dipterum genome assembly, contig: clodip2_s1038, whole genome shotgun sequence	1	10795
Cloeon dipterum	dip1	>CADEPI010001039.1 Cloeon dipterum genome assembly, contig: clodip2_s1039, whole genome shotgun sequence	1	10793
Cloeon dipterum	dip1	>CADEPI010001040.1 Cloeon dipterum genome assembly, contig: clodip2_s1040, whole genome shotgun sequence	1	10741
Cloeon dipterum	dip1	>CADEPI010001041.1 Cloeon dipterum genome assembly, contig: clodip2_s1041, whole genome shotgun sequence	1	10734
Cloeon dipterum	dip1	>CADEPI010001042.1 Cloeon dipterum genome assembly, contig: clodip2_s1042, whole genome shotgun sequence	1	1045
Cloeon dipterum	dip1	>CADEPI010001042.1 Cloeon dipterum genome assembly, contig: clodip2_s1042, whole genome shotgun sequence	1046	10665
Cloeon dipterum	dip1	>CADEPI010001043.1 Cloeon dipterum genome assembly, contig: clodip2_s1043, whole genome shotgun sequence	1	10634
Cloeon dipterum	dip1	>CADEPI010001044.1 Cloeon dipterum genome assembly, contig: clodip2_s1044, whole genome shotgun sequence	1	10624
Cloeon dipterum	dip1	>CADEPI010001045.1 Cloeon dipterum genome assembly, contig: clodip2_s1045, whole genome shotgun sequence	1	10588
Cloeon dipterum	dip1	>CADEPI010001046.1 Cloeon dipterum genome assembly, contig: clodip2_s1046, whole genome shotgun sequence	1	10556
Cloeon dipterum	dip1	>CADEPI010001047.1 Cloeon dipterum genome assembly, contig: clodip2_s1047, whole genome shotgun sequence	1	10532
Cloeon dipterum	dip1	>CADEPI010001048.1 Cloeon dipterum genome assembly, contig: clodip2_s1048, whole genome shotgun sequence	1	10483
Cloeon dipterum	dip1	>CADEPI010001049.1 Cloeon dipterum genome assembly, contig: clodip2_s1049, whole genome shotgun sequence	1	10464
Cloeon dipterum	dip1	>CADEPI010001050.1 Cloeon dipterum genome assembly, contig: clodip2_s1050, whole genome shotgun sequence	1	10451
Cloeon dipterum	dip1	>CADEPI010001051.1 Cloeon dipterum genome assembly, contig: clodip2_s1051, whole genome shotgun sequence	1	6039
Cloeon dipterum	dip1	>CADEPI010001051.1 Cloeon dipterum genome assembly, contig: clodip2_s1051, whole genome shotgun sequence	6040	10423
Cloeon dipterum	dip1	>CADEPI010001052.1 Cloeon dipterum genome assembly, contig: clodip2_s1052, whole genome shotgun sequence	1	10388
Cloeon dipterum	dip1	>CADEPI010001053.1 Cloeon dipterum genome assembly, contig: clodip2_s1053, whole genome shotgun sequence	1	10364
Cloeon dipterum	dip1	>CADEPI010001054.1 Cloeon dipterum genome assembly, contig: clodip2_s1054, whole genome shotgun sequence	1	10341
Cloeon dipterum	dip1	>CADEPI010001055.1 Cloeon dipterum genome assembly, contig: clodip2_s1055, whole genome shotgun sequence	1	10326
Cloeon dipterum	dip1	>CADEPI010001056.1 Cloeon dipterum genome assembly, contig: clodip2_s1056, whole genome shotgun sequence	1	10313
Cloeon dipterum	dip1	>CADEPI010001057.1 Cloeon dipterum genome assembly, contig: clodip2_s1057, whole genome shotgun sequence	1	10308
Cloeon dipterum	dip1	>CADEPI010001058.1 Cloeon dipterum genome assembly, contig: clodip2_s1058, whole genome shotgun sequence	1	10231
Cloeon dipterum	dip1	>CADEPI010001059.1 Cloeon dipterum genome assembly, contig: clodip2_s1059, whole genome shotgun sequence	1	10226
Cloeon dipterum	dip1	>CADEPI010001060.1 Cloeon dipterum genome assembly, contig: clodip2_s1060, whole genome shotgun sequence	1	10144
Cloeon dipterum	dip1	>CADEPI010001061.1 Cloeon dipterum genome assembly, contig: clodip2_s1061, whole genome shotgun sequence	2966	10092
Cloeon dipterum	dip1	>CADEPI010001061.1 Cloeon dipterum genome assembly, contig: clodip2_s1061, whole genome shotgun sequence	1	2965
Cloeon dipterum	dip1	>CADEPI010001062.1 Cloeon dipterum genome assembly, contig: clodip2_s1062, whole genome shotgun sequence	1	10083
Cloeon dipterum	dip1	>CADEPI010001063.1 Cloeon dipterum genome assembly, contig: clodip2_s1063, whole genome shotgun sequence	1	10069
Cloeon dipterum	dip1	>CADEPI010001064.1 Cloeon dipterum genome assembly, contig: clodip2_s1064, whole genome shotgun sequence	1	10060
Cloeon dipterum	dip1	>CADEPI010001065.1 Cloeon dipterum genome assembly, contig: clodip2_s1065, whole genome shotgun sequence	1	9982
Cloeon dipterum	dip1	>CADEPI010001066.1 Cloeon dipterum genome assembly, contig: clodip2_s1066, whole genome shotgun sequence	1	9978
Cloeon dipterum	dip1	>CADEPI010001067.1 Cloeon dipterum genome assembly, contig: clodip2_s1067, whole genome shotgun sequence	1	9967
Cloeon dipterum	dip1	>CADEPI010001068.1 Cloeon dipterum genome assembly, contig: clodip2_s1068, whole genome shotgun sequence	1	9964
Cloeon dipterum	dip1	>CADEPI010001069.1 Cloeon dipterum genome assembly, contig: clodip2_s1069, whole genome shotgun sequence	1	9916
Cloeon dipterum	dip1	>CADEPI010001070.1 Cloeon dipterum genome assembly, contig: clodip2_s1070, whole genome shotgun sequence	1	9886
Cloeon dipterum	dip1	>CADEPI010001071.1 Cloeon dipterum genome assembly, contig: clodip2_s1071, whole genome shotgun sequence	2959	9802
Cloeon dipterum	dip1	>CADEPI010001071.1 Cloeon dipterum genome assembly, contig: clodip2_s1071, whole genome shotgun sequence	1	2958
Cloeon dipterum	dip1	>CADEPI010001072.1 Cloeon dipterum genome assembly, contig: clodip2_s1072, whole genome shotgun sequence	1	9791
Cloeon dipterum	dip1	>CADEPI010001073.1 Cloeon dipterum genome assembly, contig: clodip2_s1073, whole genome shotgun sequence	1	9785
Cloeon dipterum	dip1	>CADEPI010001074.1 Cloeon dipterum genome assembly, contig: clodip2_s1074, whole genome shotgun sequence	1	9776
Cloeon dipterum	dip1	>CADEPI010001075.1 Cloeon dipterum genome assembly, contig: clodip2_s1075, whole genome shotgun sequence	1	9737
Cloeon dipterum	dip1	>CADEPI010001076.1 Cloeon dipterum genome assembly, contig: clodip2_s1076, whole genome shotgun sequence	1	9724
Cloeon dipterum	dip1	>CADEPI010001077.1 Cloeon dipterum genome assembly, contig: clodip2_s1077, whole genome shotgun sequence	1	9668
Cloeon dipterum	dip1	>CADEPI010001078.1 Cloeon dipterum genome assembly, contig: clodip2_s1078, whole genome shotgun sequence	1	9643
Cloeon dipterum	dip1	>CADEPI010001079.1 Cloeon dipterum genome assembly, contig: clodip2_s1079, whole genome shotgun sequence	1	9617
Cloeon dipterum	dip1	>CADEPI010001080.1 Cloeon dipterum genome assembly, contig: clodip2_s1080, whole genome shotgun sequence	1	9610
Cloeon dipterum	dip1	>CADEPI010001081.1 Cloeon dipterum genome assembly, contig: clodip2_s1081, whole genome shotgun sequence	1	5795
Cloeon dipterum	dip1	>CADEPI010001081.1 Cloeon dipterum genome assembly, contig: clodip2_s1081, whole genome shotgun sequence	5796	9599
Cloeon dipterum	dip1	>CADEPI010001082.1 Cloeon dipterum genome assembly, contig: clodip2_s1082, whole genome shotgun sequence	1	9595
Cloeon dipterum	dip1	>CADEPI010001083.1 Cloeon dipterum genome assembly, contig: clodip2_s1083, whole genome shotgun sequence	1	9552
Cloeon dipterum	dip1	>CADEPI010001084.1 Cloeon dipterum genome assembly, contig: clodip2_s1084, whole genome shotgun sequence	1	9546
Cloeon dipterum	dip1	>CADEPI010001085.1 Cloeon dipterum genome assembly, contig: clodip2_s1085, whole genome shotgun sequence	1	9538
Cloeon dipterum	dip1	>CADEPI010001086.1 Cloeon dipterum genome assembly, contig: clodip2_s1086, whole genome shotgun sequence	1	9525
Cloeon dipterum	dip1	>CADEPI010001087.1 Cloeon dipterum genome assembly, contig: clodip2_s1087, whole genome shotgun sequence	1	9522
Cloeon dipterum	dip1	>CADEPI010001088.1 Cloeon dipterum genome assembly, contig: clodip2_s1088, whole genome shotgun sequence	1	9506
Cloeon dipterum	dip1	>CADEPI010001089.1 Cloeon dipterum genome assembly, contig: clodip2_s1089, whole genome shotgun sequence	1	9476
Cloeon dipterum	dip1	>CADEPI010001090.1 Cloeon dipterum genome assembly, contig: clodip2_s1090, whole genome shotgun sequence	1	9465
Cloeon dipterum	dip1	>CADEPI010001091.1 Cloeon dipterum genome assembly, contig: clodip2_s1091, whole genome shotgun sequence	1	9417
Cloeon dipterum	dip1	>CADEPI010001092.1 Cloeon dipterum genome assembly, contig: clodip2_s1092, whole genome shotgun sequence	1	1043
Cloeon dipterum	dip1	>CADEPI010001092.1 Cloeon dipterum genome assembly, contig: clodip2_s1092, whole genome shotgun sequence	1044	9364
Cloeon dipterum	dip1	>CADEPI010001093.1 Cloeon dipterum genome assembly, contig: clodip2_s1093, whole genome shotgun sequence	1	9317
Cloeon dipterum	dip1	>CADEPI010001094.1 Cloeon dipterum genome assembly, contig: clodip2_s1094, whole genome shotgun sequence	1	9285
Cloeon dipterum	dip1	>CADEPI010001095.1 Cloeon dipterum genome assembly, contig: clodip2_s1095, whole genome shotgun sequence	1	9279
Cloeon dipterum	dip1	>CADEPI010001096.1 Cloeon dipterum genome assembly, contig: clodip2_s1096, whole genome shotgun sequence	1	9270
Cloeon dipterum	dip1	>CADEPI010001097.1 Cloeon dipterum genome assembly, contig: clodip2_s1097, whole genome shotgun sequence	1	9223
Cloeon dipterum	dip1	>CADEPI010001098.1 Cloeon dipterum genome assembly, contig: clodip2_s1098, whole genome shotgun sequence	1	9205
Cloeon dipterum	dip1	>CADEPI010001099.1 Cloeon dipterum genome assembly, contig: clodip2_s1099, whole genome shotgun sequence	1	9146
Cloeon dipterum	dip1	>CADEPI010001100.1 Cloeon dipterum genome assembly, contig: clodip2_s1100, whole genome shotgun sequence	1	9095
Cloeon dipterum	dip1	>CADEPI010001101.1 Cloeon dipterum genome assembly, contig: clodip2_s1101, whole genome shotgun sequence	1	9055
Cloeon dipterum	dip1	>CADEPI010001102.1 Cloeon dipterum genome assembly, contig: clodip2_s1102, whole genome shotgun sequence	1	8794
Cloeon dipterum	dip1	>CADEPI010001102.1 Cloeon dipterum genome assembly, contig: clodip2_s1102, whole genome shotgun sequence	8795	9040
Cloeon dipterum	dip1	>CADEPI010001103.1 Cloeon dipterum genome assembly, contig: clodip2_s1103, whole genome shotgun sequence	1	8978
Cloeon dipterum	dip1	>CADEPI010001104.1 Cloeon dipterum genome assembly, contig: clodip2_s1104, whole genome shotgun sequence	1	8954
Cloeon dipterum	dip1	>CADEPI010001105.1 Cloeon dipterum genome assembly, contig: clodip2_s1105, whole genome shotgun sequence	1	8897
Cloeon dipterum	dip1	>CADEPI010001106.1 Cloeon dipterum genome assembly, contig: clodip2_s1106, whole genome shotgun sequence	1	8888
Cloeon dipterum	dip1	>CADEPI010001107.1 Cloeon dipterum genome assembly, contig: clodip2_s1107, whole genome shotgun sequence	1	8883
Cloeon dipterum	dip1	>CADEPI010001108.1 Cloeon dipterum genome assembly, contig: clodip2_s1108, whole genome shotgun sequence	1	8867
Cloeon dipterum	dip1	>CADEPI010001109.1 Cloeon dipterum genome assembly, contig: clodip2_s1109, whole genome shotgun sequence	1	8838
Cloeon dipterum	dip1	>CADEPI010001110.1 Cloeon dipterum genome assembly, contig: clodip2_s1110, whole genome shotgun sequence	1	8834
Cloeon dipterum	dip1	>CADEPI010001111.1 Cloeon dipterum genome assembly, contig: clodip2_s1111, whole genome shotgun sequence	1	8775
Cloeon dipterum	dip1	>CADEPI010001112.1 Cloeon dipterum genome assembly, contig: clodip2_s1112, whole genome shotgun sequence	1	8741
Cloeon dipterum	dip1	>CADEPI010001113.1 Cloeon dipterum genome assembly, contig: clodip2_s1113, whole genome shotgun sequence	1	8738
Cloeon dipterum	dip1	>CADEPI010001114.1 Cloeon dipterum genome assembly, contig: clodip2_s1114, whole genome shotgun sequence	1	2349
Cloeon dipterum	dip1	>CADEPI010001114.1 Cloeon dipterum genome assembly, contig: clodip2_s1114, whole genome shotgun sequence	2350	8714
Cloeon dipterum	dip1	>CADEPI010001115.1 Cloeon dipterum genome assembly, contig: clodip2_s1115, whole genome shotgun sequence	1	8645
Cloeon dipterum	dip1	>CADEPI010001116.1 Cloeon dipterum genome assembly, contig: clodip2_s1116, whole genome shotgun sequence	1	8626
Cloeon dipterum	dip1	>CADEPI010001117.1 Cloeon dipterum genome assembly, contig: clodip2_s1117, whole genome shotgun sequence	1	8571
Cloeon dipterum	dip1	>CADEPI010001118.1 Cloeon dipterum genome assembly, contig: clodip2_s1118, whole genome shotgun sequence	1	8570
Cloeon dipterum	dip1	>CADEPI010001119.1 Cloeon dipterum genome assembly, contig: clodip2_s1119, whole genome shotgun sequence	1	8569
Cloeon dipterum	dip1	>CADEPI010001120.1 Cloeon dipterum genome assembly, contig: clodip2_s1120, whole genome shotgun sequence	1	8562
Cloeon dipterum	dip1	>CADEPI010001121.1 Cloeon dipterum genome assembly, contig: clodip2_s1121, whole genome shotgun sequence	1	8545
Cloeon dipterum	dip1	>CADEPI010001122.1 Cloeon dipterum genome assembly, contig: clodip2_s1122, whole genome shotgun sequence	1	8509
Cloeon dipterum	dip1	>CADEPI010001123.1 Cloeon dipterum genome assembly, contig: clodip2_s1123, whole genome shotgun sequence	1	8457
Cloeon dipterum	dip1	>CADEPI010001124.1 Cloeon dipterum genome assembly, contig: clodip2_s1124, whole genome shotgun sequence	1	8409
Cloeon dipterum	dip1	>CADEPI010001125.1 Cloeon dipterum genome assembly, contig: clodip2_s1125, whole genome shotgun sequence	8162	8402
Cloeon dipterum	dip1	>CADEPI010001125.1 Cloeon dipterum genome assembly, contig: clodip2_s1125, whole genome shotgun sequence	1	8161
Cloeon dipterum	dip1	>CADEPI010001126.1 Cloeon dipterum genome assembly, contig: clodip2_s1126, whole genome shotgun sequence	1	8383
Cloeon dipterum	dip1	>CADEPI010001127.1 Cloeon dipterum genome assembly, contig: clodip2_s1127, whole genome shotgun sequence	1	8252
Cloeon dipterum	dip1	>CADEPI010001128.1 Cloeon dipterum genome assembly, contig: clodip2_s1128, whole genome shotgun sequence	1	8242
Cloeon dipterum	dip1	>CADEPI010001129.1 Cloeon dipterum genome assembly, contig: clodip2_s1129, whole genome shotgun sequence	1	8227
Cloeon dipterum	dip1	>CADEPI010001130.1 Cloeon dipterum genome assembly, contig: clodip2_s1130, whole genome shotgun sequence	1	8214
Cloeon dipterum	dip1	>CADEPI010001131.1 Cloeon dipterum genome assembly, contig: clodip2_s1131, whole genome shotgun sequence	1	8176
Cloeon dipterum	dip1	>CADEPI010001132.1 Cloeon dipterum genome assembly, contig: clodip2_s1132, whole genome shotgun sequence	1	8144
Cloeon dipterum	dip1	>CADEPI010001133.1 Cloeon dipterum genome assembly, contig: clodip2_s1133, whole genome shotgun sequence	1	8087
Cloeon dipterum	dip1	>CADEPI010001134.1 Cloeon dipterum genome assembly, contig: clodip2_s1134, whole genome shotgun sequence	1	8015
Cloeon dipterum	dip1	>CADEPI010001135.1 Cloeon dipterum genome assembly, contig: clodip2_s1135, whole genome shotgun sequence	1	8014
Cloeon dipterum	dip1	>CADEPI010001136.1 Cloeon dipterum genome assembly, contig: clodip2_s1136, whole genome shotgun sequence	1	7996
Cloeon dipterum	dip1	>CADEPI010001137.1 Cloeon dipterum genome assembly, contig: clodip2_s1137, whole genome shotgun sequence	1	7994
Cloeon dipterum	dip1	>CADEPI010001138.1 Cloeon dipterum genome assembly, contig: clodip2_s1138, whole genome shotgun sequence	1	2002
Cloeon dipterum	dip1	>CADEPI010001138.1 Cloeon dipterum genome assembly, contig: clodip2_s1138, whole genome shotgun sequence	2003	7992
Cloeon dipterum	dip1	>CADEPI010001139.1 Cloeon dipterum genome assembly, contig: clodip2_s1139, whole genome shotgun sequence	1	7985
Cloeon dipterum	dip1	>CADEPI010001140.1 Cloeon dipterum genome assembly, contig: clodip2_s1140, whole genome shotgun sequence	1	7863
Cloeon dipterum	dip1	>CADEPI010001141.1 Cloeon dipterum genome assembly, contig: clodip2_s1141, whole genome shotgun sequence	1	7810
Cloeon dipterum	dip1	>CADEPI010001142.1 Cloeon dipterum genome assembly, contig: clodip2_s1142, whole genome shotgun sequence	1	7809
Cloeon dipterum	dip1	>CADEPI010001143.1 Cloeon dipterum genome assembly, contig: clodip2_s1143, whole genome shotgun sequence	1	7785
Cloeon dipterum	dip1	>CADEPI010001144.1 Cloeon dipterum genome assembly, contig: clodip2_s1144, whole genome shotgun sequence	1	7781
Cloeon dipterum	dip1	>CADEPI010001145.1 Cloeon dipterum genome assembly, contig: clodip2_s1145, whole genome shotgun sequence	1	7708
Cloeon dipterum	dip1	>CADEPI010001146.1 Cloeon dipterum genome assembly, contig: clodip2_s1146, whole genome shotgun sequence	1	7683
Cloeon dipterum	dip1	>CADEPI010001147.1 Cloeon dipterum genome assembly, contig: clodip2_s1147, whole genome shotgun sequence	1	7641
Cloeon dipterum	dip1	>CADEPI010001148.1 Cloeon dipterum genome assembly, contig: clodip2_s1148, whole genome shotgun sequence	1	7633
Cloeon dipterum	dip1	>CADEPI010001149.1 Cloeon dipterum genome assembly, contig: clodip2_s1149, whole genome shotgun sequence	1	7603
Cloeon dipterum	dip1	>CADEPI010001150.1 Cloeon dipterum genome assembly, contig: clodip2_s1150, whole genome shotgun sequence	1	7592
Cloeon dipterum	dip1	>CADEPI010001151.1 Cloeon dipterum genome assembly, contig: clodip2_s1151, whole genome shotgun sequence	1105	7582
Cloeon dipterum	dip1	>CADEPI010001151.1 Cloeon dipterum genome assembly, contig: clodip2_s1151, whole genome shotgun sequence	1	1104
Cloeon dipterum	dip1	>CADEPI010001152.1 Cloeon dipterum genome assembly, contig: clodip2_s1152, whole genome shotgun sequence	1	7529
Cloeon dipterum	dip1	>CADEPI010001153.1 Cloeon dipterum genome assembly, contig: clodip2_s1153, whole genome shotgun sequence	1	7494
Cloeon dipterum	dip1	>CADEPI010001154.1 Cloeon dipterum genome assembly, contig: clodip2_s1154, whole genome shotgun sequence	1	7367
Cloeon dipterum	dip1	>CADEPI010001155.1 Cloeon dipterum genome assembly, contig: clodip2_s1155, whole genome shotgun sequence	1	7346
Cloeon dipterum	dip1	>CADEPI010001156.1 Cloeon dipterum genome assembly, contig: clodip2_s1156, whole genome shotgun sequence	1	7343
Cloeon dipterum	dip1	>CADEPI010001157.1 Cloeon dipterum genome assembly, contig: clodip2_s1157, whole genome shotgun sequence	1	7334
Cloeon dipterum	dip1	>CADEPI010001158.1 Cloeon dipterum genome assembly, contig: clodip2_s1158, whole genome shotgun sequence	1	7283
Cloeon dipterum	dip1	>CADEPI010001159.1 Cloeon dipterum genome assembly, contig: clodip2_s1159, whole genome shotgun sequence	1	7249
Cloeon dipterum	dip1	>CADEPI010001160.1 Cloeon dipterum genome assembly, contig: clodip2_s1160, whole genome shotgun sequence	1	7196
Cloeon dipterum	dip1	>CADEPI010001161.1 Cloeon dipterum genome assembly, contig: clodip2_s1161, whole genome shotgun sequence	1	7188
Cloeon dipterum	dip1	>CADEPI010001162.1 Cloeon dipterum genome assembly, contig: clodip2_s1162, whole genome shotgun sequence	1	7149
Cloeon dipterum	dip1	>CADEPI010001163.1 Cloeon dipterum genome assembly, contig: clodip2_s1163, whole genome shotgun sequence	1	7107
Cloeon dipterum	dip1	>CADEPI010001164.1 Cloeon dipterum genome assembly, contig: clodip2_s1164, whole genome shotgun sequence	5925	7003
Cloeon dipterum	dip1	>CADEPI010001164.1 Cloeon dipterum genome assembly, contig: clodip2_s1164, whole genome shotgun sequence	1	5924
Cloeon dipterum	dip1	>CADEPI010001165.1 Cloeon dipterum genome assembly, contig: clodip2_s1165, whole genome shotgun sequence	1	7001
Cloeon dipterum	dip1	>CADEPI010001166.1 Cloeon dipterum genome assembly, contig: clodip2_s1166, whole genome shotgun sequence	1	6993
Cloeon dipterum	dip1	>CADEPI010001167.1 Cloeon dipterum genome assembly, contig: clodip2_s1167, whole genome shotgun sequence	1	6970
Cloeon dipterum	dip1	>CADEPI010001168.1 Cloeon dipterum genome assembly, contig: clodip2_s1168, whole genome shotgun sequence	1	6899
Cloeon dipterum	dip1	>CADEPI010001169.1 Cloeon dipterum genome assembly, contig: clodip2_s1169, whole genome shotgun sequence	1	6896
Cloeon dipterum	dip1	>CADEPI010001170.1 Cloeon dipterum genome assembly, contig: clodip2_s1170, whole genome shotgun sequence	1	6864
Cloeon dipterum	dip1	>CADEPI010001171.1 Cloeon dipterum genome assembly, contig: clodip2_s1171, whole genome shotgun sequence	1	6815
Cloeon dipterum	dip1	>CADEPI010001172.1 Cloeon dipterum genome assembly, contig: clodip2_s1172, whole genome shotgun sequence	1	6765
Cloeon dipterum	dip1	>CADEPI010001173.1 Cloeon dipterum genome assembly, contig: clodip2_s1173, whole genome shotgun sequence	1	6742
Cloeon dipterum	dip1	>CADEPI010001174.1 Cloeon dipterum genome assembly, contig: clodip2_s1174, whole genome shotgun sequence	1	6742
Cloeon dipterum	dip1	>CADEPI010001175.1 Cloeon dipterum genome assembly, contig: clodip2_s1175, whole genome shotgun sequence	1	6726
Cloeon dipterum	dip1	>CADEPI010001176.1 Cloeon dipterum genome assembly, contig: clodip2_s1176, whole genome shotgun sequence	1	6725
Cloeon dipterum	dip1	>CADEPI010001177.1 Cloeon dipterum genome assembly, contig: clodip2_s1177, whole genome shotgun sequence	1	6682
Cloeon dipterum	dip1	>CADEPI010001178.1 Cloeon dipterum genome assembly, contig: clodip2_s1178, whole genome shotgun sequence	1	6667
Cloeon dipterum	dip1	>CADEPI010001179.1 Cloeon dipterum genome assembly, contig: clodip2_s1179, whole genome shotgun sequence	1	3419
Cloeon dipterum	dip1	>CADEPI010001179.1 Cloeon dipterum genome assembly, contig: clodip2_s1179, whole genome shotgun sequence	3420	6574
Cloeon dipterum	dip1	>CADEPI010001180.1 Cloeon dipterum genome assembly, contig: clodip2_s1180, whole genome shotgun sequence	1	6554
Cloeon dipterum	dip1	>CADEPI010001181.1 Cloeon dipterum genome assembly, contig: clodip2_s1181, whole genome shotgun sequence	1	6520
Cloeon dipterum	dip1	>CADEPI010001182.1 Cloeon dipterum genome assembly, contig: clodip2_s1182, whole genome shotgun sequence	1	6514
Cloeon dipterum	dip1	>CADEPI010001183.1 Cloeon dipterum genome assembly, contig: clodip2_s1183, whole genome shotgun sequence	1	6492
Cloeon dipterum	dip1	>CADEPI010001184.1 Cloeon dipterum genome assembly, contig: clodip2_s1184, whole genome shotgun sequence	1	6486
Cloeon dipterum	dip1	>CADEPI010001185.1 Cloeon dipterum genome assembly, contig: clodip2_s1185, whole genome shotgun sequence	1	6391
Cloeon dipterum	dip1	>CADEPI010001186.1 Cloeon dipterum genome assembly, contig: clodip2_s1186, whole genome shotgun sequence	1	6383
Cloeon dipterum	dip1	>CADEPI010001187.1 Cloeon dipterum genome assembly, contig: clodip2_s1187, whole genome shotgun sequence	1	6314
Cloeon dipterum	dip1	>CADEPI010001188.1 Cloeon dipterum genome assembly, contig: clodip2_s1188, whole genome shotgun sequence	1	6302
Cloeon dipterum	dip1	>CADEPI010001189.1 Cloeon dipterum genome assembly, contig: clodip2_s1189, whole genome shotgun sequence	1	6267
Cloeon dipterum	dip1	>CADEPI010001190.1 Cloeon dipterum genome assembly, contig: clodip2_s1190, whole genome shotgun sequence	1	6247
Cloeon dipterum	dip1	>CADEPI010001191.1 Cloeon dipterum genome assembly, contig: clodip2_s1191, whole genome shotgun sequence	1	6237
Cloeon dipterum	dip1	>CADEPI010001192.1 Cloeon dipterum genome assembly, contig: clodip2_s1192, whole genome shotgun sequence	1	6223
Cloeon dipterum	dip1	>CADEPI010001193.1 Cloeon dipterum genome assembly, contig: clodip2_s1193, whole genome shotgun sequence	1	6206
Cloeon dipterum	dip1	>CADEPI010001194.1 Cloeon dipterum genome assembly, contig: clodip2_s1194, whole genome shotgun sequence	1	6180
Cloeon dipterum	dip1	>CADEPI010001195.1 Cloeon dipterum genome assembly, contig: clodip2_s1195, whole genome shotgun sequence	1	1513
Cloeon dipterum	dip1	>CADEPI010001195.1 Cloeon dipterum genome assembly, contig: clodip2_s1195, whole genome shotgun sequence	1514	6179
Cloeon dipterum	dip1	>CADEPI010001196.1 Cloeon dipterum genome assembly, contig: clodip2_s1196, whole genome shotgun sequence	1	6160
Cloeon dipterum	dip1	>CADEPI010001197.1 Cloeon dipterum genome assembly, contig: clodip2_s1197, whole genome shotgun sequence	1	6125
Cloeon dipterum	dip1	>CADEPI010001198.1 Cloeon dipterum genome assembly, contig: clodip2_s1198, whole genome shotgun sequence	1	6108
Cloeon dipterum	dip1	>CADEPI010001199.1 Cloeon dipterum genome assembly, contig: clodip2_s1199, whole genome shotgun sequence	1	6046
Cloeon dipterum	dip1	>CADEPI010001200.1 Cloeon dipterum genome assembly, contig: clodip2_s1200, whole genome shotgun sequence	1	6036
Cloeon dipterum	dip1	>CADEPI010001201.1 Cloeon dipterum genome assembly, contig: clodip2_s1201, whole genome shotgun sequence	1	5868
Cloeon dipterum	dip1	>CADEPI010001202.1 Cloeon dipterum genome assembly, contig: clodip2_s1202, whole genome shotgun sequence	1	5788
Cloeon dipterum	dip1	>CADEPI010001203.1 Cloeon dipterum genome assembly, contig: clodip2_s1203, whole genome shotgun sequence	1	5778
Cloeon dipterum	dip1	>CADEPI010001204.1 Cloeon dipterum genome assembly, contig: clodip2_s1204, whole genome shotgun sequence	1	5706
Cloeon dipterum	dip1	>CADEPI010001205.1 Cloeon dipterum genome assembly, contig: clodip2_s1205, whole genome shotgun sequence	1	5650
Cloeon dipterum	dip1	>CADEPI010001206.1 Cloeon dipterum genome assembly, contig: clodip2_s1206, whole genome shotgun sequence	1	5586
Cloeon dipterum	dip1	>CADEPI010001207.1 Cloeon dipterum genome assembly, contig: clodip2_s1207, whole genome shotgun sequence	1	5566
Cloeon dipterum	dip1	>CADEPI010001208.1 Cloeon dipterum genome assembly, contig: clodip2_s1208, whole genome shotgun sequence	1	5532
Cloeon dipterum	dip1	>CADEPI010001209.1 Cloeon dipterum genome assembly, contig: clodip2_s1209, whole genome shotgun sequence	1	5489
Cloeon dipterum	dip1	>CADEPI010001210.1 Cloeon dipterum genome assembly, contig: clodip2_s1210, whole genome shotgun sequence	1	5447
Cloeon dipterum	dip1	>CADEPI010001211.1 Cloeon dipterum genome assembly, contig: clodip2_s1211, whole genome shotgun sequence	1	5431
Cloeon dipterum	dip1	>CADEPI010001212.1 Cloeon dipterum genome assembly, contig: clodip2_s1212, whole genome shotgun sequence	3002	5415
Cloeon dipterum	dip1	>CADEPI010001212.1 Cloeon dipterum genome assembly, contig: clodip2_s1212, whole genome shotgun sequence	1	3001
Cloeon dipterum	dip1	>CADEPI010001213.1 Cloeon dipterum genome assembly, contig: clodip2_s1213, whole genome shotgun sequence	1	5408
Cloeon dipterum	dip1	>CADEPI010001214.1 Cloeon dipterum genome assembly, contig: clodip2_s1214, whole genome shotgun sequence	1	5355
Cloeon dipterum	dip1	>CADEPI010001215.1 Cloeon dipterum genome assembly, contig: clodip2_s1215, whole genome shotgun sequence	1	5338
Cloeon dipterum	dip1	>CADEPI010001216.1 Cloeon dipterum genome assembly, contig: clodip2_s1216, whole genome shotgun sequence	1	5323
Cloeon dipterum	dip1	>CADEPI010001217.1 Cloeon dipterum genome assembly, contig: clodip2_s1217, whole genome shotgun sequence	1	5296
Cloeon dipterum	dip1	>CADEPI010001218.1 Cloeon dipterum genome assembly, contig: clodip2_s1218, whole genome shotgun sequence	1	5292
Cloeon dipterum	dip1	>CADEPI010001219.1 Cloeon dipterum genome assembly, contig: clodip2_s1219, whole genome shotgun sequence	1	5232
Cloeon dipterum	dip1	>CADEPI010001220.1 Cloeon dipterum genome assembly, contig: clodip2_s1220, whole genome shotgun sequence	1	5182
Cloeon dipterum	dip1	>CADEPI010001221.1 Cloeon dipterum genome assembly, contig: clodip2_s1221, whole genome shotgun sequence	1	5136
Cloeon dipterum	dip1	>CADEPI010001222.1 Cloeon dipterum genome assembly, contig: clodip2_s1222, whole genome shotgun sequence	1	5134
Cloeon dipterum	dip1	>CADEPI010001223.1 Cloeon dipterum genome assembly, contig: clodip2_s1223, whole genome shotgun sequence	1	5115
Cloeon dipterum	dip1	>CADEPI010001224.1 Cloeon dipterum genome assembly, contig: clodip2_s1224, whole genome shotgun sequence	1	5100
Cloeon dipterum	dip1	>CADEPI010001225.1 Cloeon dipterum genome assembly, contig: clodip2_s1225, whole genome shotgun sequence	1	5087
Cloeon dipterum	dip1	>CADEPI010001226.1 Cloeon dipterum genome assembly, contig: clodip2_s1226, whole genome shotgun sequence	1	5082
Cloeon dipterum	dip1	>CADEPI010001227.1 Cloeon dipterum genome assembly, contig: clodip2_s1227, whole genome shotgun sequence	1	5071
Cloeon dipterum	dip1	>CADEPI010001228.1 Cloeon dipterum genome assembly, contig: clodip2_s1228, whole genome shotgun sequence	1	5062
Cloeon dipterum	dip1	>CADEPI010001229.1 Cloeon dipterum genome assembly, contig: clodip2_s1229, whole genome shotgun sequence	1	4985
Cloeon dipterum	dip1	>CADEPI010001230.1 Cloeon dipterum genome assembly, contig: clodip2_s1230, whole genome shotgun sequence	1	4979
Cloeon dipterum	dip1	>CADEPI010001231.1 Cloeon dipterum genome assembly, contig: clodip2_s1231, whole genome shotgun sequence	4391	4963
Cloeon dipterum	dip1	>CADEPI010001231.1 Cloeon dipterum genome assembly, contig: clodip2_s1231, whole genome shotgun sequence	1	4390
Cloeon dipterum	dip1	>CADEPI010001232.1 Cloeon dipterum genome assembly, contig: clodip2_s1232, whole genome shotgun sequence	1	4955
Cloeon dipterum	dip1	>CADEPI010001233.1 Cloeon dipterum genome assembly, contig: clodip2_s1233, whole genome shotgun sequence	1	4923
Cloeon dipterum	dip1	>CADEPI010001234.1 Cloeon dipterum genome assembly, contig: clodip2_s1234, whole genome shotgun sequence	1	4873
Cloeon dipterum	dip1	>CADEPI010001235.1 Cloeon dipterum genome assembly, contig: clodip2_s1235, whole genome shotgun sequence	1	4872
Cloeon dipterum	dip1	>CADEPI010001236.1 Cloeon dipterum genome assembly, contig: clodip2_s1236, whole genome shotgun sequence	1	4798
Cloeon dipterum	dip1	>CADEPI010001237.1 Cloeon dipterum genome assembly, contig: clodip2_s1237, whole genome shotgun sequence	1	4751
Cloeon dipterum	dip1	>CADEPI010001238.1 Cloeon dipterum genome assembly, contig: clodip2_s1238, whole genome shotgun sequence	1	4672
Cloeon dipterum	dip1	>CADEPI010001239.1 Cloeon dipterum genome assembly, contig: clodip2_s1239, whole genome shotgun sequence	1	4654
Cloeon dipterum	dip1	>CADEPI010001240.1 Cloeon dipterum genome assembly, contig: clodip2_s1240, whole genome shotgun sequence	1	4586
Cloeon dipterum	dip1	>CADEPI010001241.1 Cloeon dipterum genome assembly, contig: clodip2_s1241, whole genome shotgun sequence	1	4554
Cloeon dipterum	dip1	>CADEPI010001242.1 Cloeon dipterum genome assembly, contig: clodip2_s1242, whole genome shotgun sequence	1	4547
Cloeon dipterum	dip1	>CADEPI010001243.1 Cloeon dipterum genome assembly, contig: clodip2_s1243, whole genome shotgun sequence	1	4546
Cloeon dipterum	dip1	>CADEPI010001244.1 Cloeon dipterum genome assembly, contig: clodip2_s1244, whole genome shotgun sequence	1	4503
Cloeon dipterum	dip1	>CADEPI010001245.1 Cloeon dipterum genome assembly, contig: clodip2_s1245, whole genome shotgun sequence	1	4426
Cloeon dipterum	dip1	>CADEPI010001246.1 Cloeon dipterum genome assembly, contig: clodip2_s1246, whole genome shotgun sequence	1	4407
Cloeon dipterum	dip1	>CADEPI010001247.1 Cloeon dipterum genome assembly, contig: clodip2_s1247, whole genome shotgun sequence	1	4400
Cloeon dipterum	dip1	>CADEPI010001248.1 Cloeon dipterum genome assembly, contig: clodip2_s1248, whole genome shotgun sequence	1	4388
Cloeon dipterum	dip1	>CADEPI010001249.1 Cloeon dipterum genome assembly, contig: clodip2_s1249, whole genome shotgun sequence	1	4368
Cloeon dipterum	dip1	>CADEPI010001250.1 Cloeon dipterum genome assembly, contig: clodip2_s1250, whole genome shotgun sequence	1	4335
Cloeon dipterum	dip1	>CADEPI010001251.1 Cloeon dipterum genome assembly, contig: clodip2_s1251, whole genome shotgun sequence	1	4314
Cloeon dipterum	dip1	>CADEPI010001252.1 Cloeon dipterum genome assembly, contig: clodip2_s1252, whole genome shotgun sequence	1	4287
Cloeon dipterum	dip1	>CADEPI010001253.1 Cloeon dipterum genome assembly, contig: clodip2_s1253, whole genome shotgun sequence	3247	4286
Cloeon dipterum	dip1	>CADEPI010001253.1 Cloeon dipterum genome assembly, contig: clodip2_s1253, whole genome shotgun sequence	1	3246
Cloeon dipterum	dip1	>CADEPI010001254.1 Cloeon dipterum genome assembly, contig: clodip2_s1254, whole genome shotgun sequence	1	4266
Cloeon dipterum	dip1	>CADEPI010001255.1 Cloeon dipterum genome assembly, contig: clodip2_s1255, whole genome shotgun sequence	1	4242
Cloeon dipterum	dip1	>CADEPI010001256.1 Cloeon dipterum genome assembly, contig: clodip2_s1256, whole genome shotgun sequence	1	4240
Cloeon dipterum	dip1	>CADEPI010001257.1 Cloeon dipterum genome assembly, contig: clodip2_s1257, whole genome shotgun sequence	1	4227
Cloeon dipterum	dip1	>CADEPI010001258.1 Cloeon dipterum genome assembly, contig: clodip2_s1258, whole genome shotgun sequence	1	4216
Cloeon dipterum	dip1	>CADEPI010001259.1 Cloeon dipterum genome assembly, contig: clodip2_s1259, whole genome shotgun sequence	1	4209
Cloeon dipterum	dip1	>CADEPI010001260.1 Cloeon dipterum genome assembly, contig: clodip2_s1260, whole genome shotgun sequence	1	4195
Cloeon dipterum	dip1	>CADEPI010001261.1 Cloeon dipterum genome assembly, contig: clodip2_s1261, whole genome shotgun sequence	1	4191
Cloeon dipterum	dip1	>CADEPI010001262.1 Cloeon dipterum genome assembly, contig: clodip2_s1262, whole genome shotgun sequence	1	4191
Cloeon dipterum	dip1	>CADEPI010001263.1 Cloeon dipterum genome assembly, contig: clodip2_s1263, whole genome shotgun sequence	1	4147
Cloeon dipterum	dip1	>CADEPI010001264.1 Cloeon dipterum genome assembly, contig: clodip2_s1264, whole genome shotgun sequence	1	4147
Cloeon dipterum	dip1	>CADEPI010001265.1 Cloeon dipterum genome assembly, contig: clodip2_s1265, whole genome shotgun sequence	1	4139
Cloeon dipterum	dip1	>CADEPI010001266.1 Cloeon dipterum genome assembly, contig: clodip2_s1266, whole genome shotgun sequence	1	4101
Cloeon dipterum	dip1	>CADEPI010001267.1 Cloeon dipterum genome assembly, contig: clodip2_s1267, whole genome shotgun sequence	1	4095
Cloeon dipterum	dip1	>CADEPI010001268.1 Cloeon dipterum genome assembly, contig: clodip2_s1268, whole genome shotgun sequence	1	4016
Cloeon dipterum	dip1	>CADEPI010001269.1 Cloeon dipterum genome assembly, contig: clodip2_s1269, whole genome shotgun sequence	1	3961
Cloeon dipterum	dip1	>CADEPI010001270.1 Cloeon dipterum genome assembly, contig: clodip2_s1270, whole genome shotgun sequence	1	3952
Cloeon dipterum	dip1	>CADEPI010001271.1 Cloeon dipterum genome assembly, contig: clodip2_s1271, whole genome shotgun sequence	1	3935
Cloeon dipterum	dip1	>CADEPI010001272.1 Cloeon dipterum genome assembly, contig: clodip2_s1272, whole genome shotgun sequence	1	3927
Cloeon dipterum	dip1	>CADEPI010001273.1 Cloeon dipterum genome assembly, contig: clodip2_s1273, whole genome shotgun sequence	1	3887
Cloeon dipterum	dip1	>CADEPI010001274.1 Cloeon dipterum genome assembly, contig: clodip2_s1274, whole genome shotgun sequence	1	3876
Cloeon dipterum	dip1	>CADEPI010001275.1 Cloeon dipterum genome assembly, contig: clodip2_s1275, whole genome shotgun sequence	1	3765
Cloeon dipterum	dip1	>CADEPI010001276.1 Cloeon dipterum genome assembly, contig: clodip2_s1276, whole genome shotgun sequence	1	3762
Cloeon dipterum	dip1	>CADEPI010001277.1 Cloeon dipterum genome assembly, contig: clodip2_s1277, whole genome shotgun sequence	1	3752
Cloeon dipterum	dip1	>CADEPI010001278.1 Cloeon dipterum genome assembly, contig: clodip2_s1278, whole genome shotgun sequence	1	1496
Cloeon dipterum	dip1	>CADEPI010001278.1 Cloeon dipterum genome assembly, contig: clodip2_s1278, whole genome shotgun sequence	1497	3752
Cloeon dipterum	dip1	>CADEPI010001279.1 Cloeon dipterum genome assembly, contig: clodip2_s1279, whole genome shotgun sequence	1	3747
Cloeon dipterum	dip1	>CADEPI010001280.1 Cloeon dipterum genome assembly, contig: clodip2_s1280, whole genome shotgun sequence	1	3710
Cloeon dipterum	dip1	>CADEPI010001281.1 Cloeon dipterum genome assembly, contig: clodip2_s1281, whole genome shotgun sequence	1	3704
Cloeon dipterum	dip1	>CADEPI010001282.1 Cloeon dipterum genome assembly, contig: clodip2_s1282, whole genome shotgun sequence	1	3682
Cloeon dipterum	dip1	>CADEPI010001283.1 Cloeon dipterum genome assembly, contig: clodip2_s1283, whole genome shotgun sequence	1	3665
Cloeon dipterum	dip1	>CADEPI010001284.1 Cloeon dipterum genome assembly, contig: clodip2_s1284, whole genome shotgun sequence	1	3601
Cloeon dipterum	dip1	>CADEPI010001285.1 Cloeon dipterum genome assembly, contig: clodip2_s1285, whole genome shotgun sequence	1	3585
Cloeon dipterum	dip1	>CADEPI010001286.1 Cloeon dipterum genome assembly, contig: clodip2_s1286, whole genome shotgun sequence	1	3566
Cloeon dipterum	dip1	>CADEPI010001287.1 Cloeon dipterum genome assembly, contig: clodip2_s1287, whole genome shotgun sequence	1	3564
Cloeon dipterum	dip1	>CADEPI010001288.1 Cloeon dipterum genome assembly, contig: clodip2_s1288, whole genome shotgun sequence	1	3501
Cloeon dipterum	dip1	>CADEPI010001289.1 Cloeon dipterum genome assembly, contig: clodip2_s1289, whole genome shotgun sequence	1	3485
Cloeon dipterum	dip1	>CADEPI010001290.1 Cloeon dipterum genome assembly, contig: clodip2_s1290, whole genome shotgun sequence	1	3415
Cloeon dipterum	dip1	>CADEPI010001291.1 Cloeon dipterum genome assembly, contig: clodip2_s1291, whole genome shotgun sequence	1	3411
Cloeon dipterum	dip1	>CADEPI010001292.1 Cloeon dipterum genome assembly, contig: clodip2_s1292, whole genome shotgun sequence	1	3362
Cloeon dipterum	dip1	>CADEPI010001293.1 Cloeon dipterum genome assembly, contig: clodip2_s1293, whole genome shotgun sequence	1	3361
Cloeon dipterum	dip1	>CADEPI010001294.1 Cloeon dipterum genome assembly, contig: clodip2_s1294, whole genome shotgun sequence	1	3351
Cloeon dipterum	dip1	>CADEPI010001295.1 Cloeon dipterum genome assembly, contig: clodip2_s1295, whole genome shotgun sequence	1	3350
Cloeon dipterum	dip1	>CADEPI010001296.1 Cloeon dipterum genome assembly, contig: clodip2_s1296, whole genome shotgun sequence	1	3329
Cloeon dipterum	dip1	>CADEPI010001297.1 Cloeon dipterum genome assembly, contig: clodip2_s1297, whole genome shotgun sequence	1	3328
Cloeon dipterum	dip1	>CADEPI010001298.1 Cloeon dipterum genome assembly, contig: clodip2_s1298, whole genome shotgun sequence	1	3322
Cloeon dipterum	dip1	>CADEPI010001299.1 Cloeon dipterum genome assembly, contig: clodip2_s1299, whole genome shotgun sequence	1	3307
Cloeon dipterum	dip1	>CADEPI010001300.1 Cloeon dipterum genome assembly, contig: clodip2_s1300, whole genome shotgun sequence	1	3301
Cloeon dipterum	dip1	>CADEPI010001301.1 Cloeon dipterum genome assembly, contig: clodip2_s1301, whole genome shotgun sequence	1	3299
Cloeon dipterum	dip1	>CADEPI010001302.1 Cloeon dipterum genome assembly, contig: clodip2_s1302, whole genome shotgun sequence	1	3275
Cloeon dipterum	dip1	>CADEPI010001303.1 Cloeon dipterum genome assembly, contig: clodip2_s1303, whole genome shotgun sequence	1	3271
Cloeon dipterum	dip1	>CADEPI010001304.1 Cloeon dipterum genome assembly, contig: clodip2_s1304, whole genome shotgun sequence	1	3257
Cloeon dipterum	dip1	>CADEPI010001305.1 Cloeon dipterum genome assembly, contig: clodip2_s1305, whole genome shotgun sequence	1	3243
Cloeon dipterum	dip1	>CADEPI010001306.1 Cloeon dipterum genome assembly, contig: clodip2_s1306, whole genome shotgun sequence	1	3180
Cloeon dipterum	dip1	>CADEPI010001307.1 Cloeon dipterum genome assembly, contig: clodip2_s1307, whole genome shotgun sequence	1	1543
Cloeon dipterum	dip1	>CADEPI010001307.1 Cloeon dipterum genome assembly, contig: clodip2_s1307, whole genome shotgun sequence	1544	3177
Cloeon dipterum	dip1	>CADEPI010001308.1 Cloeon dipterum genome assembly, contig: clodip2_s1308, whole genome shotgun sequence	1	3163
Cloeon dipterum	dip1	>CADEPI010001309.1 Cloeon dipterum genome assembly, contig: clodip2_s1309, whole genome shotgun sequence	1	3148
Cloeon dipterum	dip1	>CADEPI010001310.1 Cloeon dipterum genome assembly, contig: clodip2_s1310, whole genome shotgun sequence	1	3142
Cloeon dipterum	dip1	>CADEPI010001311.1 Cloeon dipterum genome assembly, contig: clodip2_s1311, whole genome shotgun sequence	1	3109
Cloeon dipterum	dip1	>CADEPI010001312.1 Cloeon dipterum genome assembly, contig: clodip2_s1312, whole genome shotgun sequence	1	3103
Cloeon dipterum	dip1	>CADEPI010001313.1 Cloeon dipterum genome assembly, contig: clodip2_s1313, whole genome shotgun sequence	1	3100
Cloeon dipterum	dip1	>CADEPI010001314.1 Cloeon dipterum genome assembly, contig: clodip2_s1314, whole genome shotgun sequence	1	3093
Cloeon dipterum	dip1	>CADEPI010001315.1 Cloeon dipterum genome assembly, contig: clodip2_s1315, whole genome shotgun sequence	1	3067
Cloeon dipterum	dip1	>CADEPI010001316.1 Cloeon dipterum genome assembly, contig: clodip2_s1316, whole genome shotgun sequence	1	3017
Cloeon dipterum	dip1	>CADEPI010001317.1 Cloeon dipterum genome assembly, contig: clodip2_s1317, whole genome shotgun sequence	1	2994
Cloeon dipterum	dip1	>CADEPI010001318.1 Cloeon dipterum genome assembly, contig: clodip2_s1318, whole genome shotgun sequence	1	2992
Cloeon dipterum	dip1	>CADEPI010001319.1 Cloeon dipterum genome assembly, contig: clodip2_s1319, whole genome shotgun sequence	1	2975
Cloeon dipterum	dip1	>CADEPI010001320.1 Cloeon dipterum genome assembly, contig: clodip2_s1320, whole genome shotgun sequence	1	2963
Cloeon dipterum	dip1	>CADEPI010001321.1 Cloeon dipterum genome assembly, contig: clodip2_s1321, whole genome shotgun sequence	1	2949
Cloeon dipterum	dip1	>CADEPI010001322.1 Cloeon dipterum genome assembly, contig: clodip2_s1322, whole genome shotgun sequence	1	2850
Cloeon dipterum	dip1	>CADEPI010001323.1 Cloeon dipterum genome assembly, contig: clodip2_s1323, whole genome shotgun sequence	1	2844
Cloeon dipterum	dip1	>CADEPI010001324.1 Cloeon dipterum genome assembly, contig: clodip2_s1324, whole genome shotgun sequence	1	2769
Cloeon dipterum	dip1	>CADEPI010001325.1 Cloeon dipterum genome assembly, contig: clodip2_s1325, whole genome shotgun sequence	1	2753
Cloeon dipterum	dip1	>CADEPI010001326.1 Cloeon dipterum genome assembly, contig: clodip2_s1326, whole genome shotgun sequence	1	2725
Cloeon dipterum	dip1	>CADEPI010001327.1 Cloeon dipterum genome assembly, contig: clodip2_s1327, whole genome shotgun sequence	1	2714
Cloeon dipterum	dip1	>CADEPI010001328.1 Cloeon dipterum genome assembly, contig: clodip2_s1328, whole genome shotgun sequence	1	2671
Cloeon dipterum	dip1	>CADEPI010001329.1 Cloeon dipterum genome assembly, contig: clodip2_s1329, whole genome shotgun sequence	1	2668
Cloeon dipterum	dip1	>CADEPI010001330.1 Cloeon dipterum genome assembly, contig: clodip2_s1330, whole genome shotgun sequence	1	2634
Cloeon dipterum	dip1	>CADEPI010001331.1 Cloeon dipterum genome assembly, contig: clodip2_s1331, whole genome shotgun sequence	1	2611
Cloeon dipterum	dip1	>CADEPI010001332.1 Cloeon dipterum genome assembly, contig: clodip2_s1332, whole genome shotgun sequence	1	2607
Cloeon dipterum	dip1	>CADEPI010001333.1 Cloeon dipterum genome assembly, contig: clodip2_s1333, whole genome shotgun sequence	1	2602
Cloeon dipterum	dip1	>CADEPI010001334.1 Cloeon dipterum genome assembly, contig: clodip2_s1334, whole genome shotgun sequence	1	2572
Cloeon dipterum	dip1	>CADEPI010001335.1 Cloeon dipterum genome assembly, contig: clodip2_s1335, whole genome shotgun sequence	1	2553
Cloeon dipterum	dip1	>CADEPI010001336.1 Cloeon dipterum genome assembly, contig: clodip2_s1336, whole genome shotgun sequence	1	2550
Cloeon dipterum	dip1	>CADEPI010001337.1 Cloeon dipterum genome assembly, contig: clodip2_s1337, whole genome shotgun sequence	1	2532
Cloeon dipterum	dip1	>CADEPI010001338.1 Cloeon dipterum genome assembly, contig: clodip2_s1338, whole genome shotgun sequence	1	2504
Cloeon dipterum	dip1	>CADEPI010001339.1 Cloeon dipterum genome assembly, contig: clodip2_s1339, whole genome shotgun sequence	1	2490
Cloeon dipterum	dip1	>CADEPI010001340.1 Cloeon dipterum genome assembly, contig: clodip2_s1340, whole genome shotgun sequence	1	2426
Cloeon dipterum	dip1	>CADEPI010001341.1 Cloeon dipterum genome assembly, contig: clodip2_s1341, whole genome shotgun sequence	1	2346
Cloeon dipterum	dip1	>CADEPI010001342.1 Cloeon dipterum genome assembly, contig: clodip2_s1342, whole genome shotgun sequence	1	2343
Cloeon dipterum	dip1	>CADEPI010001343.1 Cloeon dipterum genome assembly, contig: clodip2_s1343, whole genome shotgun sequence	1	751
Schizaphis graminum	gra1	>CM037032.1 Schizaphis graminum isolate BZ-2018 chromosome 2, whole genome shotgun sequence	69753650	69853649
Schizaphis graminum	gra1	>CM037032.1 Schizaphis graminum isolate BZ-2018 chromosome 2, whole genome shotgun sequence	69653650	69753649
Schizaphis graminum	gra1	>CM037032.1 Schizaphis graminum isolate BZ-2018 chromosome 2, whole genome shotgun sequence	69853650	69953649
Schizaphis graminum	gra1	>JAJFBB010000013.1 Schizaphis graminum isolate BZ-2018 scaffold7, whole genome shotgun sequence	128119	228118
Schizaphis graminum	gra1	>JAJFBB010000013.1 Schizaphis graminum isolate BZ-2018 scaffold7, whole genome shotgun sequence	228119	301997
Schizaphis graminum	gra1	>JAJFBB010000013.1 Schizaphis graminum isolate BZ-2018 scaffold7, whole genome shotgun sequence	28119	128118
Schizaphis graminum	gra1	>JAJFBB010000014.1 Schizaphis graminum isolate BZ-2018 scaffold8, whole genome shotgun sequence	1	26120
Schizaphis graminum	gra2	>CM037031.1 Schizaphis graminum isolate BZ-2018 chromosome 1, whole genome shotgun sequence	53500001	53600000
Schizaphis graminum	gra2	>CM037031.1 Schizaphis graminum isolate BZ-2018 chromosome 1, whole genome shotgun sequence	53400001	53500000
Schizaphis graminum	gra2	>CM037031.1 Schizaphis graminum isolate BZ-2018 chromosome 1, whole genome shotgun sequence	53300001	53400000
Schizaphis graminum	gra2	>CM037031.1 Schizaphis graminum isolate BZ-2018 chromosome 1, whole genome shotgun sequence	53600001	53700000
Reticulitermes speratus	spe1	>JAJKFL010000001.1 Reticulitermes speratus isolate ELV_2017 SceRxO1_1;HRSCAF=1, whole genome shotgun sequence	46300001	46400000
Reticulitermes speratus	spe1	>JAJKFL010000001.1 Reticulitermes speratus isolate ELV_2017 SceRxO1_1;HRSCAF=1, whole genome shotgun sequence	48100001	48200000
Reticulitermes speratus	spe1	>JAJKFL010000006.1 Reticulitermes speratus isolate ELV_2017 SceRxO1_6;HRSCAF=83, whole genome shotgun sequence	11754195	11854194
Reticulitermes speratus	spe1	>JAJKFL010000010.1 Reticulitermes speratus isolate ELV_2017 SceRxO1_10;HRSCAF=124, whole genome shotgun sequence	23298715	23398714
Reticulitermes speratus	spe1	>JAJKFL010000013.1 Reticulitermes speratus isolate ELV_2017 SceRxO1_13;HRSCAF=145, whole genome shotgun sequence	17781583	17881582
Reticulitermes speratus	spe1	>JAJKFL010000014.1 Reticulitermes speratus isolate ELV_2017 SceRxO1_14;HRSCAF=146, whole genome shotgun sequence	25506141	25606140
Reticulitermes speratus	spe1	>JAJKFL010000014.1 Reticulitermes speratus isolate ELV_2017 SceRxO1_14;HRSCAF=146, whole genome shotgun sequence	3406141	3506140
Reticulitermes speratus	spe1	>JAJKFL010000330.1 Reticulitermes speratus isolate ELV_2017 SceRxO1_330;HRSCAF=578, whole genome shotgun sequence	4536193	4636192
Reticulitermes speratus	spe1	>JAJKFL010000427.1 Reticulitermes speratus isolate ELV_2017 SceRxO1_428;HRSCAF=696, whole genome shotgun sequence	15801800	15901799
Aricia agestis	age1	>NC_056407.1 Aricia agestis chromosome 2, ilAriAges1.1, whole genome shotgun sequence	24801684	24835252
Aricia agestis	age1	>NC_056408.1 Aricia agestis chromosome 3, ilAriAges1.1, whole genome shotgun sequence	1	66430
Aricia agestis	age1	>NC_056409.1 Aricia agestis chromosome 4, ilAriAges1.1, whole genome shotgun sequence	22800618	22860255
Aricia agestis	age1	>NC_056410.1 Aricia agestis chromosome 5, ilAriAges1.1, whole genome shotgun sequence	21640362	21698237
Aricia agestis	age1	>NC_056410.1 Aricia agestis chromosome 5, ilAriAges1.1, whole genome shotgun sequence	1	40361
Aricia agestis	age1	>NC_056411.1 Aricia agestis chromosome 6, ilAriAges1.1, whole genome shotgun sequence	1	42123
Aricia agestis	age1	>NC_056411.1 Aricia agestis chromosome 6, ilAriAges1.1, whole genome shotgun sequence	20942124	20997721
Aricia agestis	age1	>NC_056412.1 Aricia agestis chromosome 7, ilAriAges1.1, whole genome shotgun sequence	1	44401
Aricia agestis	age1	>NC_056412.1 Aricia agestis chromosome 7, ilAriAges1.1, whole genome shotgun sequence	19544402	19551575
Aricia agestis	age1	>NC_056413.1 Aricia agestis chromosome 8, ilAriAges1.1, whole genome shotgun sequence	18992826	19030843
Aricia agestis	age1	>NC_056413.1 Aricia agestis chromosome 8, ilAriAges1.1, whole genome shotgun sequence	1	92825
Aricia agestis	age1	>NC_056414.1 Aricia agestis chromosome 9, ilAriAges1.1, whole genome shotgun sequence	1	61981
Aricia agestis	age1	>NC_056415.1 Aricia agestis chromosome 10, ilAriAges1.1, whole genome shotgun sequence	17680500	17774651
Aricia agestis	age1	>NC_056416.1 Aricia agestis chromosome 11, ilAriAges1.1, whole genome shotgun sequence	1	5847
Aricia agestis	age1	>NC_056417.1 Aricia agestis chromosome 12, ilAriAges1.1, whole genome shotgun sequence	16610417	16642429
Aricia agestis	age1	>NC_056418.1 Aricia agestis chromosome 13, ilAriAges1.1, whole genome shotgun sequence	1	67986
Aricia agestis	age1	>NC_056420.1 Aricia agestis chromosome 15, ilAriAges1.1, whole genome shotgun sequence	15189365	15266331
Aricia agestis	age1	>NC_056421.1 Aricia agestis chromosome 16, ilAriAges1.1, whole genome shotgun sequence	1	23032
Aricia agestis	age1	>NC_056422.1 Aricia agestis chromosome 17, ilAriAges1.1, whole genome shotgun sequence	14807461	14820519
Aricia agestis	age1	>NC_056423.1 Aricia agestis chromosome 18, ilAriAges1.1, whole genome shotgun sequence	1	86940
Aricia agestis	age1	>NC_056423.1 Aricia agestis chromosome 18, ilAriAges1.1, whole genome shotgun sequence	14586941	14664134
Aricia agestis	age1	>NC_056424.1 Aricia agestis chromosome 19, ilAriAges1.1, whole genome shotgun sequence	14422806	14506835
Aricia agestis	age1	>NC_056424.1 Aricia agestis chromosome 19, ilAriAges1.1, whole genome shotgun sequence	1	22805
Aricia agestis	age1	>NC_056425.1 Aricia agestis chromosome 20, ilAriAges1.1, whole genome shotgun sequence	1	15969
Aricia agestis	age1	>NC_056427.1 Aricia agestis chromosome 22, ilAriAges1.1, whole genome shotgun sequence	9053239	9090845
Aricia agestis	age1	>NC_056428.1 Aricia agestis chromosome Z, ilAriAges1.1, whole genome shotgun sequence	1	62392
Aricia agestis	age1	>NC_056428.1 Aricia agestis chromosome Z, ilAriAges1.1, whole genome shotgun sequence	42062393	42150342
Aricia agestis	age1	>NW_024599856.1 Aricia agestis unplaced genomic scaffold, ilAriAges1.1, whole genome shotgun sequence	1	12049
Chrysoperla carnea	car1	>NC_058338.1 Chrysoperla carnea chromosome 2, inChrCarn1.1, whole genome shotgun sequence	20122	120121
Chrysoperla carnea	car1	>NC_058339.1 Chrysoperla carnea chromosome 3, inChrCarn1.1, whole genome shotgun sequence	94275969	94375968
Chrysoperla carnea	car1	>NC_058339.1 Chrysoperla carnea chromosome 3, inChrCarn1.1, whole genome shotgun sequence	94075969	94175968
Chrysoperla carnea	car1	>NC_058339.1 Chrysoperla carnea chromosome 3, inChrCarn1.1, whole genome shotgun sequence	94175969	94275968
Chrysoperla carnea	car1	>NC_058339.1 Chrysoperla carnea chromosome 3, inChrCarn1.1, whole genome shotgun sequence	94375969	94407144
Chrysoperla carnea	car1	>NC_058340.1 Chrysoperla carnea chromosome 4, inChrCarn1.1, whole genome shotgun sequence	1	68823
Chrysoperla carnea	car1	>NC_058342.1 Chrysoperla carnea chromosome X, inChrCarn1.1, whole genome shotgun sequence	38565585	38618709
Chrysoperla carnea	car1	>NW_025408044.1 Chrysoperla carnea chromosome X unlocalized genomic scaffold, inChrCarn1.1 SUPER_X_unloc_1, whole genome shotgun sequence	1	46874
Chrysoperla carnea	car1	>NW_025408285.1 Chrysoperla carnea unplaced genomic scaffold, inChrCarn1.1, whole genome shotgun sequence	78618	102330
Chrysoperla carnea	car1	>NW_025408286.1 Chrysoperla carnea unplaced genomic scaffold, inChrCarn1.1, whole genome shotgun sequence	76287	100585
Chrysoperla carnea	car1	>NW_025408286.1 Chrysoperla carnea unplaced genomic scaffold, inChrCarn1.1, whole genome shotgun sequence	1	76286
Chrysoperla carnea	car1	>NW_025408287.1 Chrysoperla carnea unplaced genomic scaffold, inChrCarn1.1, whole genome shotgun sequence	1	75700
Chrysoperla carnea	car1	>NW_025408292.1 Chrysoperla carnea unplaced genomic scaffold, inChrCarn1.1, whole genome shotgun sequence	81038	96187
Chrysoperla carnea	car1	>NW_025408293.1 Chrysoperla carnea unplaced genomic scaffold, inChrCarn1.1, whole genome shotgun sequence	1	84849
Chrysoperla carnea	car1	>NW_025408297.1 Chrysoperla carnea unplaced genomic scaffold, inChrCarn1.1, whole genome shotgun sequence	21746	86903
Chrysoperla carnea	car1	>NW_025408298.1 Chrysoperla carnea unplaced genomic scaffold, inChrCarn1.1, whole genome shotgun sequence	1	34841
Chrysoperla carnea	car2	>NC_058337.1 Chrysoperla carnea chromosome 1, inChrCarn1.1, whole genome shotgun sequence	138100001	138200000
Chrysoperla carnea	car2	>NC_058337.1 Chrysoperla carnea chromosome 1, inChrCarn1.1, whole genome shotgun sequence	138200001	138300000
Chrysoperla carnea	car2	>NC_058337.1 Chrysoperla carnea chromosome 1, inChrCarn1.1, whole genome shotgun sequence	105000001	105100000
Chrysoperla carnea	car2	>NC_058337.1 Chrysoperla carnea chromosome 1, inChrCarn1.1, whole genome shotgun sequence	138000001	138100000
Chrysoperla carnea	car2	>NC_058338.1 Chrysoperla carnea chromosome 2, inChrCarn1.1, whole genome shotgun sequence	520122	620121
Chrysoperla carnea	car2	>NC_058338.1 Chrysoperla carnea chromosome 2, inChrCarn1.1, whole genome shotgun sequence	100620122	100720121
Chrysoperla carnea	car2	>NC_058338.1 Chrysoperla carnea chromosome 2, inChrCarn1.1, whole genome shotgun sequence	84620122	84720121
Chrysoperla carnea	car2	>NC_058338.1 Chrysoperla carnea chromosome 2, inChrCarn1.1, whole genome shotgun sequence	100320122	100420121
Chrysoperla carnea	car2	>NC_058338.1 Chrysoperla carnea chromosome 2, inChrCarn1.1, whole genome shotgun sequence	100420122	100520121
Chrysoperla carnea	car2	>NC_058338.1 Chrysoperla carnea chromosome 2, inChrCarn1.1, whole genome shotgun sequence	100720122	100744152
Chrysoperla carnea	car2	>NC_058338.1 Chrysoperla carnea chromosome 2, inChrCarn1.1, whole genome shotgun sequence	100520122	100620121
Chrysoperla carnea	car2	>NC_058339.1 Chrysoperla carnea chromosome 3, inChrCarn1.1, whole genome shotgun sequence	175969	275968
Chrysoperla carnea	car2	>NC_058339.1 Chrysoperla carnea chromosome 3, inChrCarn1.1, whole genome shotgun sequence	1	75968
Chrysoperla carnea	car2	>NC_058339.1 Chrysoperla carnea chromosome 3, inChrCarn1.1, whole genome shotgun sequence	75969	175968
Chrysoperla carnea	car2	>NC_058340.1 Chrysoperla carnea chromosome 4, inChrCarn1.1, whole genome shotgun sequence	77468824	77476099
Chrysoperla carnea	car2	>NC_058341.1 Chrysoperla carnea chromosome 5, inChrCarn1.1, whole genome shotgun sequence	76292724	76392723
Chrysoperla carnea	car2	>NC_058341.1 Chrysoperla carnea chromosome 5, inChrCarn1.1, whole genome shotgun sequence	1	92723
Chrysoperla carnea	car2	>NC_058341.1 Chrysoperla carnea chromosome 5, inChrCarn1.1, whole genome shotgun sequence	76392724	76427138
Chrysoperla carnea	car2	>NC_058342.1 Chrysoperla carnea chromosome X, inChrCarn1.1, whole genome shotgun sequence	1	65584
Chrysoperla carnea	car2	>NC_058342.1 Chrysoperla carnea chromosome X, inChrCarn1.1, whole genome shotgun sequence	37865585	37965584
Chrysoperla carnea	car2	>NW_025408123.1 Chrysoperla carnea chromosome X unlocalized genomic scaffold, inChrCarn1.1 SUPER_X_unloc_170, whole genome shotgun sequence	10166	21432
Chrysoperla carnea	car2	>NW_025408124.1 Chrysoperla carnea chromosome X unlocalized genomic scaffold, inChrCarn1.1 SUPER_X_unloc_171, whole genome shotgun sequence	1	21082
Chrysoperla carnea	car2	>NW_025408125.1 Chrysoperla carnea chromosome X unlocalized genomic scaffold, inChrCarn1.1 SUPER_X_unloc_172, whole genome shotgun sequence	1	20985
Chrysoperla carnea	car2	>NW_025408126.1 Chrysoperla carnea chromosome X unlocalized genomic scaffold, inChrCarn1.1 SUPER_X_unloc_173, whole genome shotgun sequence	1	20972
Chrysoperla carnea	car2	>NW_025408127.1 Chrysoperla carnea chromosome X unlocalized genomic scaffold, inChrCarn1.1 SUPER_X_unloc_174, whole genome shotgun sequence	1	20396
Chrysoperla carnea	car2	>NW_025408128.1 Chrysoperla carnea chromosome X unlocalized genomic scaffold, inChrCarn1.1 SUPER_X_unloc_175, whole genome shotgun sequence	1	5293
Chrysoperla carnea	car2	>NW_025408145.1 Chrysoperla carnea chromosome X unlocalized genomic scaffold, inChrCarn1.1 SUPER_X_unloc_2, whole genome shotgun sequence	422234	422789
Chrysoperla carnea	car2	>NW_025408146.1 Chrysoperla carnea chromosome X unlocalized genomic scaffold, inChrCarn1.1 SUPER_X_unloc_20, whole genome shotgun sequence	1	59263
Chrysoperla carnea	car2	>NW_025408147.1 Chrysoperla carnea chromosome X unlocalized genomic scaffold, inChrCarn1.1 SUPER_X_unloc_21, whole genome shotgun sequence	1	40179
Chrysoperla carnea	car2	>NW_025408231.1 Chrysoperla carnea chromosome X unlocalized genomic scaffold, inChrCarn1.1 SUPER_X_unloc_98, whole genome shotgun sequence	1356	31106
Chrysoperla carnea	car2	>NW_025408232.1 Chrysoperla carnea chromosome X unlocalized genomic scaffold, inChrCarn1.1 SUPER_X_unloc_99, whole genome shotgun sequence	1	31066
Chrysoperla carnea	car2	>NW_025408233.1 Chrysoperla carnea unplaced genomic scaffold, inChrCarn1.1, whole genome shotgun sequence	1	39181
Chrysoperla carnea	car2	>NW_025408234.1 Chrysoperla carnea unplaced genomic scaffold, inChrCarn1.1, whole genome shotgun sequence	126402	226401
Chrysoperla carnea	car2	>NW_025408234.1 Chrysoperla carnea unplaced genomic scaffold, inChrCarn1.1, whole genome shotgun sequence	426402	526401
Chrysoperla carnea	car2	>NW_025408234.1 Chrysoperla carnea unplaced genomic scaffold, inChrCarn1.1, whole genome shotgun sequence	226402	326401
Chrysoperla carnea	car2	>NW_025408234.1 Chrysoperla carnea unplaced genomic scaffold, inChrCarn1.1, whole genome shotgun sequence	26402	126401
Chrysoperla carnea	car2	>NW_025408234.1 Chrysoperla carnea unplaced genomic scaffold, inChrCarn1.1, whole genome shotgun sequence	326402	426401
Chrysoperla carnea	car2	>NW_025408235.1 Chrysoperla carnea unplaced genomic scaffold, inChrCarn1.1, whole genome shotgun sequence	711980	811979
Chrysoperla carnea	car2	>NW_025408235.1 Chrysoperla carnea unplaced genomic scaffold, inChrCarn1.1, whole genome shotgun sequence	411980	511979
Chrysoperla carnea	car2	>NW_025408235.1 Chrysoperla carnea unplaced genomic scaffold, inChrCarn1.1, whole genome shotgun sequence	311980	411979
Chrysoperla carnea	car2	>NW_025408235.1 Chrysoperla carnea unplaced genomic scaffold, inChrCarn1.1, whole genome shotgun sequence	811980	911979
Chrysoperla carnea	car2	>NW_025408235.1 Chrysoperla carnea unplaced genomic scaffold, inChrCarn1.1, whole genome shotgun sequence	111980	211979
Chrysoperla carnea	car2	>NW_025408235.1 Chrysoperla carnea unplaced genomic scaffold, inChrCarn1.1, whole genome shotgun sequence	611980	711979
Chrysoperla carnea	car2	>NW_025408235.1 Chrysoperla carnea unplaced genomic scaffold, inChrCarn1.1, whole genome shotgun sequence	511980	611979
Chrysoperla carnea	car2	>NW_025408235.1 Chrysoperla carnea unplaced genomic scaffold, inChrCarn1.1, whole genome shotgun sequence	11980	111979
Chrysoperla carnea	car2	>NW_025408235.1 Chrysoperla carnea unplaced genomic scaffold, inChrCarn1.1, whole genome shotgun sequence	211980	311979
Chrysoperla carnea	car2	>NW_025408235.1 Chrysoperla carnea unplaced genomic scaffold, inChrCarn1.1, whole genome shotgun sequence	911980	1011979
Chrysoperla carnea	car2	>NW_025408236.1 Chrysoperla carnea unplaced genomic scaffold, inChrCarn1.1, whole genome shotgun sequence	742035	753535
Chrysoperla carnea	car2	>NW_025408237.1 Chrysoperla carnea unplaced genomic scaffold, inChrCarn1.1, whole genome shotgun sequence	488499	588498
Chrysoperla carnea	car2	>NW_025408237.1 Chrysoperla carnea unplaced genomic scaffold, inChrCarn1.1, whole genome shotgun sequence	288499	388498
Chrysoperla carnea	car2	>NW_025408237.1 Chrysoperla carnea unplaced genomic scaffold, inChrCarn1.1, whole genome shotgun sequence	1	88498
Chrysoperla carnea	car2	>NW_025408237.1 Chrysoperla carnea unplaced genomic scaffold, inChrCarn1.1, whole genome shotgun sequence	88499	188498
Chrysoperla carnea	car2	>NW_025408237.1 Chrysoperla carnea unplaced genomic scaffold, inChrCarn1.1, whole genome shotgun sequence	588499	688498
Chrysoperla carnea	car2	>NW_025408237.1 Chrysoperla carnea unplaced genomic scaffold, inChrCarn1.1, whole genome shotgun sequence	688499	694170
Chrysoperla carnea	car2	>NW_025408237.1 Chrysoperla carnea unplaced genomic scaffold, inChrCarn1.1, whole genome shotgun sequence	388499	488498
Chrysoperla carnea	car2	>NW_025408237.1 Chrysoperla carnea unplaced genomic scaffold, inChrCarn1.1, whole genome shotgun sequence	188499	288498
Chrysoperla carnea	car2	>NW_025408238.1 Chrysoperla carnea unplaced genomic scaffold, inChrCarn1.1, whole genome shotgun sequence	494328	594327
Chrysoperla carnea	car2	>NW_025408238.1 Chrysoperla carnea unplaced genomic scaffold, inChrCarn1.1, whole genome shotgun sequence	294328	394327
Chrysoperla carnea	car2	>NW_025408238.1 Chrysoperla carnea unplaced genomic scaffold, inChrCarn1.1, whole genome shotgun sequence	94328	194327
Chrysoperla carnea	car2	>NW_025408238.1 Chrysoperla carnea unplaced genomic scaffold, inChrCarn1.1, whole genome shotgun sequence	194328	294327
Chrysoperla carnea	car2	>NW_025408238.1 Chrysoperla carnea unplaced genomic scaffold, inChrCarn1.1, whole genome shotgun sequence	394328	494327
Chrysoperla carnea	car2	>NW_025408238.1 Chrysoperla carnea unplaced genomic scaffold, inChrCarn1.1, whole genome shotgun sequence	594328	650676
Chrysoperla carnea	car2	>NW_025408238.1 Chrysoperla carnea unplaced genomic scaffold, inChrCarn1.1, whole genome shotgun sequence	1	94327
Chrysoperla carnea	car2	>NW_025408239.1 Chrysoperla carnea unplaced genomic scaffold, inChrCarn1.1, whole genome shotgun sequence	43651	143650
Chrysoperla carnea	car2	>NW_025408239.1 Chrysoperla carnea unplaced genomic scaffold, inChrCarn1.1, whole genome shotgun sequence	343651	443650
Chrysoperla carnea	car2	>NW_025408239.1 Chrysoperla carnea unplaced genomic scaffold, inChrCarn1.1, whole genome shotgun sequence	243651	343650
Chrysoperla carnea	car2	>NW_025408239.1 Chrysoperla carnea unplaced genomic scaffold, inChrCarn1.1, whole genome shotgun sequence	443651	447336
Chrysoperla carnea	car2	>NW_025408239.1 Chrysoperla carnea unplaced genomic scaffold, inChrCarn1.1, whole genome shotgun sequence	1	43650
Chrysoperla carnea	car2	>NW_025408239.1 Chrysoperla carnea unplaced genomic scaffold, inChrCarn1.1, whole genome shotgun sequence	143651	243650
Chrysoperla carnea	car2	>NW_025408240.1 Chrysoperla carnea unplaced genomic scaffold, inChrCarn1.1, whole genome shotgun sequence	296314	396313
Chrysoperla carnea	car2	>NW_025408240.1 Chrysoperla carnea unplaced genomic scaffold, inChrCarn1.1, whole genome shotgun sequence	196314	296313
Chrysoperla carnea	car2	>NW_025408240.1 Chrysoperla carnea unplaced genomic scaffold, inChrCarn1.1, whole genome shotgun sequence	96314	196313
Chrysoperla carnea	car2	>NW_025408240.1 Chrysoperla carnea unplaced genomic scaffold, inChrCarn1.1, whole genome shotgun sequence	1	96313
Chrysoperla carnea	car2	>NW_025408243.1 Chrysoperla carnea unplaced genomic scaffold, inChrCarn1.1, whole genome shotgun sequence	314830	352426
Chrysoperla carnea	car2	>NW_025408243.1 Chrysoperla carnea unplaced genomic scaffold, inChrCarn1.1, whole genome shotgun sequence	14830	114829
Chrysoperla carnea	car2	>NW_025408243.1 Chrysoperla carnea unplaced genomic scaffold, inChrCarn1.1, whole genome shotgun sequence	114830	214829
Chrysoperla carnea	car2	>NW_025408243.1 Chrysoperla carnea unplaced genomic scaffold, inChrCarn1.1, whole genome shotgun sequence	214830	314829
Chrysoperla carnea	car2	>NW_025408244.1 Chrysoperla carnea unplaced genomic scaffold, inChrCarn1.1, whole genome shotgun sequence	1	62402
Chrysoperla carnea	car2	>NW_025408244.1 Chrysoperla carnea unplaced genomic scaffold, inChrCarn1.1, whole genome shotgun sequence	162403	262402
Chrysoperla carnea	car2	>NW_025408244.1 Chrysoperla carnea unplaced genomic scaffold, inChrCarn1.1, whole genome shotgun sequence	62403	162402
Chrysoperla carnea	car2	>NW_025408247.1 Chrysoperla carnea unplaced genomic scaffold, inChrCarn1.1, whole genome shotgun sequence	168668	264881
Chrysoperla carnea	car2	>NW_025408247.1 Chrysoperla carnea unplaced genomic scaffold, inChrCarn1.1, whole genome shotgun sequence	68668	168667
Chrysoperla carnea	car2	>NW_025408248.1 Chrysoperla carnea unplaced genomic scaffold, inChrCarn1.1, whole genome shotgun sequence	203786	238428
Chrysoperla carnea	car2	>NW_025408248.1 Chrysoperla carnea unplaced genomic scaffold, inChrCarn1.1, whole genome shotgun sequence	1	3785
Chrysoperla carnea	car2	>NW_025408248.1 Chrysoperla carnea unplaced genomic scaffold, inChrCarn1.1, whole genome shotgun sequence	103786	203785
Chrysoperla carnea	car2	>NW_025408248.1 Chrysoperla carnea unplaced genomic scaffold, inChrCarn1.1, whole genome shotgun sequence	3786	103785
Chrysoperla carnea	car2	>NW_025408249.1 Chrysoperla carnea unplaced genomic scaffold, inChrCarn1.1, whole genome shotgun sequence	1	65356
Chrysoperla carnea	car2	>NW_025408249.1 Chrysoperla carnea unplaced genomic scaffold, inChrCarn1.1, whole genome shotgun sequence	165357	231477
Chrysoperla carnea	car2	>NW_025408249.1 Chrysoperla carnea unplaced genomic scaffold, inChrCarn1.1, whole genome shotgun sequence	65357	165356
Chrysoperla carnea	car2	>NW_025408250.1 Chrysoperla carnea unplaced genomic scaffold, inChrCarn1.1, whole genome shotgun sequence	1	33878
Chrysoperla carnea	car2	>NW_025408250.1 Chrysoperla carnea unplaced genomic scaffold, inChrCarn1.1, whole genome shotgun sequence	33879	133878
Chrysoperla carnea	car2	>NW_025408250.1 Chrysoperla carnea unplaced genomic scaffold, inChrCarn1.1, whole genome shotgun sequence	133879	226807
Chrysoperla carnea	car2	>NW_025408251.1 Chrysoperla carnea unplaced genomic scaffold, inChrCarn1.1, whole genome shotgun sequence	7071	107070
Chrysoperla carnea	car2	>NW_025408251.1 Chrysoperla carnea unplaced genomic scaffold, inChrCarn1.1, whole genome shotgun sequence	207071	220699
Chrysoperla carnea	car2	>NW_025408251.1 Chrysoperla carnea unplaced genomic scaffold, inChrCarn1.1, whole genome shotgun sequence	107071	207070
Chrysoperla carnea	car2	>NW_025408251.1 Chrysoperla carnea unplaced genomic scaffold, inChrCarn1.1, whole genome shotgun sequence	1	7070
Chrysoperla carnea	car2	>NW_025408252.1 Chrysoperla carnea unplaced genomic scaffold, inChrCarn1.1, whole genome shotgun sequence	1	86370
Chrysoperla carnea	car2	>NW_025408252.1 Chrysoperla carnea unplaced genomic scaffold, inChrCarn1.1, whole genome shotgun sequence	86371	186370
Chrysoperla carnea	car2	>NW_025408252.1 Chrysoperla carnea unplaced genomic scaffold, inChrCarn1.1, whole genome shotgun sequence	186371	213639
Chrysoperla carnea	car2	>NW_025408253.1 Chrysoperla carnea unplaced genomic scaffold, inChrCarn1.1, whole genome shotgun sequence	72731	172730
Chrysoperla carnea	car2	>NW_025408253.1 Chrysoperla carnea unplaced genomic scaffold, inChrCarn1.1, whole genome shotgun sequence	172731	194494
Chrysoperla carnea	car2	>NW_025408253.1 Chrysoperla carnea unplaced genomic scaffold, inChrCarn1.1, whole genome shotgun sequence	1	72730
Chrysoperla carnea	car2	>NW_025408254.1 Chrysoperla carnea unplaced genomic scaffold, inChrCarn1.1, whole genome shotgun sequence	178236	193651
Chrysoperla carnea	car2	>NW_025408254.1 Chrysoperla carnea unplaced genomic scaffold, inChrCarn1.1, whole genome shotgun sequence	1	78235
Chrysoperla carnea	car2	>NW_025408254.1 Chrysoperla carnea unplaced genomic scaffold, inChrCarn1.1, whole genome shotgun sequence	78236	178235
Chrysoperla carnea	car2	>NW_025408255.1 Chrysoperla carnea unplaced genomic scaffold, inChrCarn1.1, whole genome shotgun sequence	1	84583
Chrysoperla carnea	car2	>NW_025408255.1 Chrysoperla carnea unplaced genomic scaffold, inChrCarn1.1, whole genome shotgun sequence	84584	184583
Chrysoperla carnea	car2	>NW_025408255.1 Chrysoperla carnea unplaced genomic scaffold, inChrCarn1.1, whole genome shotgun sequence	184584	189677
Chrysoperla carnea	car2	>NW_025408256.1 Chrysoperla carnea unplaced genomic scaffold, inChrCarn1.1, whole genome shotgun sequence	94906	183926
Chrysoperla carnea	car2	>NW_025408256.1 Chrysoperla carnea unplaced genomic scaffold, inChrCarn1.1, whole genome shotgun sequence	1	94905
Chrysoperla carnea	car2	>NW_025408257.1 Chrysoperla carnea unplaced genomic scaffold, inChrCarn1.1, whole genome shotgun sequence	1	10978
Chrysoperla carnea	car2	>NW_025408258.1 Chrysoperla carnea unplaced genomic scaffold, inChrCarn1.1, whole genome shotgun sequence	32243	132242
Chrysoperla carnea	car2	>NW_025408258.1 Chrysoperla carnea unplaced genomic scaffold, inChrCarn1.1, whole genome shotgun sequence	132243	178377
Chrysoperla carnea	car2	>NW_025408259.1 Chrysoperla carnea unplaced genomic scaffold, inChrCarn1.1, whole genome shotgun sequence	53865	153864
Chrysoperla carnea	car2	>NW_025408259.1 Chrysoperla carnea unplaced genomic scaffold, inChrCarn1.1, whole genome shotgun sequence	153865	175668
Chrysoperla carnea	car2	>NW_025408259.1 Chrysoperla carnea unplaced genomic scaffold, inChrCarn1.1, whole genome shotgun sequence	1	53864
Chrysoperla carnea	car2	>NW_025408260.1 Chrysoperla carnea unplaced genomic scaffold, inChrCarn1.1, whole genome shotgun sequence	78196	174359
Chrysoperla carnea	car2	>NW_025408260.1 Chrysoperla carnea unplaced genomic scaffold, inChrCarn1.1, whole genome shotgun sequence	1	78195
Chrysoperla carnea	car2	>NW_025408261.1 Chrysoperla carnea unplaced genomic scaffold, inChrCarn1.1, whole genome shotgun sequence	1	3835
Chrysoperla carnea	car2	>NW_025408261.1 Chrysoperla carnea unplaced genomic scaffold, inChrCarn1.1, whole genome shotgun sequence	3836	103835
Chrysoperla carnea	car2	>NW_025408261.1 Chrysoperla carnea unplaced genomic scaffold, inChrCarn1.1, whole genome shotgun sequence	103836	173455
Chrysoperla carnea	car2	>NW_025408262.1 Chrysoperla carnea unplaced genomic scaffold, inChrCarn1.1, whole genome shotgun sequence	30380	130379
Chrysoperla carnea	car2	>NW_025408262.1 Chrysoperla carnea unplaced genomic scaffold, inChrCarn1.1, whole genome shotgun sequence	1	30379
Chrysoperla carnea	car2	>NW_025408262.1 Chrysoperla carnea unplaced genomic scaffold, inChrCarn1.1, whole genome shotgun sequence	130380	173771
Chrysoperla carnea	car2	>NW_025408263.1 Chrysoperla carnea unplaced genomic scaffold, inChrCarn1.1, whole genome shotgun sequence	56608	156607
Chrysoperla carnea	car2	>NW_025408263.1 Chrysoperla carnea unplaced genomic scaffold, inChrCarn1.1, whole genome shotgun sequence	156608	169648
Chrysoperla carnea	car2	>NW_025408263.1 Chrysoperla carnea unplaced genomic scaffold, inChrCarn1.1, whole genome shotgun sequence	1	56607
Chrysoperla carnea	car2	>NW_025408264.1 Chrysoperla carnea unplaced genomic scaffold, inChrCarn1.1, whole genome shotgun sequence	1	86958
Chrysoperla carnea	car2	>NW_025408264.1 Chrysoperla carnea unplaced genomic scaffold, inChrCarn1.1, whole genome shotgun sequence	86959	163797
Chrysoperla carnea	car2	>NW_025408265.1 Chrysoperla carnea unplaced genomic scaffold, inChrCarn1.1, whole genome shotgun sequence	23161	123160
Chrysoperla carnea	car2	>NW_025408265.1 Chrysoperla carnea unplaced genomic scaffold, inChrCarn1.1, whole genome shotgun sequence	123161	163128
Chrysoperla carnea	car2	>NW_025408265.1 Chrysoperla carnea unplaced genomic scaffold, inChrCarn1.1, whole genome shotgun sequence	1	23160
Chrysoperla carnea	car2	>NW_025408266.1 Chrysoperla carnea unplaced genomic scaffold, inChrCarn1.1, whole genome shotgun sequence	1	60031
Chrysoperla carnea	car2	>NW_025408266.1 Chrysoperla carnea unplaced genomic scaffold, inChrCarn1.1, whole genome shotgun sequence	60032	154540
Chrysoperla carnea	car2	>NW_025408267.1 Chrysoperla carnea unplaced genomic scaffold, inChrCarn1.1, whole genome shotgun sequence	105491	154284
Chrysoperla carnea	car2	>NW_025408267.1 Chrysoperla carnea unplaced genomic scaffold, inChrCarn1.1, whole genome shotgun sequence	5491	105490
Chrysoperla carnea	car2	>NW_025408267.1 Chrysoperla carnea unplaced genomic scaffold, inChrCarn1.1, whole genome shotgun sequence	1	5490
Chrysoperla carnea	car2	>NW_025408268.1 Chrysoperla carnea unplaced genomic scaffold, inChrCarn1.1, whole genome shotgun sequence	1	51205
Chrysoperla carnea	car2	>NW_025408268.1 Chrysoperla carnea unplaced genomic scaffold, inChrCarn1.1, whole genome shotgun sequence	151206	152042
Chrysoperla carnea	car2	>NW_025408268.1 Chrysoperla carnea unplaced genomic scaffold, inChrCarn1.1, whole genome shotgun sequence	51206	151205
Chrysoperla carnea	car2	>NW_025408269.1 Chrysoperla carnea unplaced genomic scaffold, inChrCarn1.1, whole genome shotgun sequence	1	99162
Chrysoperla carnea	car2	>NW_025408269.1 Chrysoperla carnea unplaced genomic scaffold, inChrCarn1.1, whole genome shotgun sequence	99163	148069
Chrysoperla carnea	car2	>NW_025408270.1 Chrysoperla carnea unplaced genomic scaffold, inChrCarn1.1, whole genome shotgun sequence	51093	147451
Chrysoperla carnea	car2	>NW_025408270.1 Chrysoperla carnea unplaced genomic scaffold, inChrCarn1.1, whole genome shotgun sequence	1	51092
Chrysoperla carnea	car2	>NW_025408271.1 Chrysoperla carnea unplaced genomic scaffold, inChrCarn1.1, whole genome shotgun sequence	3641	103640
Chrysoperla carnea	car2	>NW_025408271.1 Chrysoperla carnea unplaced genomic scaffold, inChrCarn1.1, whole genome shotgun sequence	1	3640
Chrysoperla carnea	car2	>NW_025408271.1 Chrysoperla carnea unplaced genomic scaffold, inChrCarn1.1, whole genome shotgun sequence	103641	145913
Chrysoperla carnea	car2	>NW_025408272.1 Chrysoperla carnea unplaced genomic scaffold, inChrCarn1.1, whole genome shotgun sequence	57727	141320
Chrysoperla carnea	car2	>NW_025408272.1 Chrysoperla carnea unplaced genomic scaffold, inChrCarn1.1, whole genome shotgun sequence	1	57726
Chrysoperla carnea	car2	>NW_025408273.1 Chrysoperla carnea unplaced genomic scaffold, inChrCarn1.1, whole genome shotgun sequence	116406	140378
Chrysoperla carnea	car2	>NW_025408273.1 Chrysoperla carnea unplaced genomic scaffold, inChrCarn1.1, whole genome shotgun sequence	1	16405
Chrysoperla carnea	car2	>NW_025408273.1 Chrysoperla carnea unplaced genomic scaffold, inChrCarn1.1, whole genome shotgun sequence	16406	116405
Chrysoperla carnea	car2	>NW_025408274.1 Chrysoperla carnea unplaced genomic scaffold, inChrCarn1.1, whole genome shotgun sequence	1	76026
Chrysoperla carnea	car2	>NW_025408274.1 Chrysoperla carnea unplaced genomic scaffold, inChrCarn1.1, whole genome shotgun sequence	76027	135831
Chrysoperla carnea	car2	>NW_025408275.1 Chrysoperla carnea unplaced genomic scaffold, inChrCarn1.1, whole genome shotgun sequence	40195	133596
Chrysoperla carnea	car2	>NW_025408275.1 Chrysoperla carnea unplaced genomic scaffold, inChrCarn1.1, whole genome shotgun sequence	1	40194
Chrysoperla carnea	car2	>NW_025408276.1 Chrysoperla carnea unplaced genomic scaffold, inChrCarn1.1, whole genome shotgun sequence	106598	130731
Chrysoperla carnea	car2	>NW_025408276.1 Chrysoperla carnea unplaced genomic scaffold, inChrCarn1.1, whole genome shotgun sequence	1	6597
Chrysoperla carnea	car2	>NW_025408276.1 Chrysoperla carnea unplaced genomic scaffold, inChrCarn1.1, whole genome shotgun sequence	6598	106597
Chrysoperla carnea	car2	>NW_025408277.1 Chrysoperla carnea unplaced genomic scaffold, inChrCarn1.1, whole genome shotgun sequence	1	75865
Chrysoperla carnea	car2	>NW_025408277.1 Chrysoperla carnea unplaced genomic scaffold, inChrCarn1.1, whole genome shotgun sequence	75866	121433
Chrysoperla carnea	car2	>NW_025408278.1 Chrysoperla carnea unplaced genomic scaffold, inChrCarn1.1, whole genome shotgun sequence	1	54431
Chrysoperla carnea	car2	>NW_025408278.1 Chrysoperla carnea unplaced genomic scaffold, inChrCarn1.1, whole genome shotgun sequence	54432	119059
Chrysoperla carnea	car2	>NW_025408279.1 Chrysoperla carnea unplaced genomic scaffold, inChrCarn1.1, whole genome shotgun sequence	35372	114098
Chrysoperla carnea	car2	>NW_025408279.1 Chrysoperla carnea unplaced genomic scaffold, inChrCarn1.1, whole genome shotgun sequence	1	35371
Chrysoperla carnea	car2	>NW_025408280.1 Chrysoperla carnea unplaced genomic scaffold, inChrCarn1.1, whole genome shotgun sequence	1	21272
Chrysoperla carnea	car2	>NW_025408280.1 Chrysoperla carnea unplaced genomic scaffold, inChrCarn1.1, whole genome shotgun sequence	21273	113056
Chrysoperla carnea	car2	>NW_025408281.1 Chrysoperla carnea unplaced genomic scaffold, inChrCarn1.1, whole genome shotgun sequence	1	8215
Chrysoperla carnea	car2	>NW_025408281.1 Chrysoperla carnea unplaced genomic scaffold, inChrCarn1.1, whole genome shotgun sequence	108216	111506
Chrysoperla carnea	car2	>NW_025408281.1 Chrysoperla carnea unplaced genomic scaffold, inChrCarn1.1, whole genome shotgun sequence	8216	108215
Chrysoperla carnea	car2	>NW_025408282.1 Chrysoperla carnea unplaced genomic scaffold, inChrCarn1.1, whole genome shotgun sequence	96709	108893
Chrysoperla carnea	car2	>NW_025408282.1 Chrysoperla carnea unplaced genomic scaffold, inChrCarn1.1, whole genome shotgun sequence	1	96708
Chrysoperla carnea	car2	>NW_025408283.1 Chrysoperla carnea unplaced genomic scaffold, inChrCarn1.1, whole genome shotgun sequence	1	87814
Chrysoperla carnea	car2	>NW_025408283.1 Chrysoperla carnea unplaced genomic scaffold, inChrCarn1.1, whole genome shotgun sequence	87815	106411
Chrysoperla carnea	car2	>NW_025408284.1 Chrysoperla carnea unplaced genomic scaffold, inChrCarn1.1, whole genome shotgun sequence	81403	102784
Chrysoperla carnea	car2	>NW_025408284.1 Chrysoperla carnea unplaced genomic scaffold, inChrCarn1.1, whole genome shotgun sequence	1	81402
Chrysoperla carnea	car2	>NW_025408285.1 Chrysoperla carnea unplaced genomic scaffold, inChrCarn1.1, whole genome shotgun sequence	1	78617
Chrysoperla carnea	car2	>NW_025408287.1 Chrysoperla carnea unplaced genomic scaffold, inChrCarn1.1, whole genome shotgun sequence	75701	99800
Chrysoperla carnea	car2	>NW_025408288.1 Chrysoperla carnea unplaced genomic scaffold, inChrCarn1.1, whole genome shotgun sequence	1	75899
Chrysoperla carnea	car2	>NW_025408288.1 Chrysoperla carnea unplaced genomic scaffold, inChrCarn1.1, whole genome shotgun sequence	75900	99619
Chrysoperla carnea	car2	>NW_025408289.1 Chrysoperla carnea unplaced genomic scaffold, inChrCarn1.1, whole genome shotgun sequence	1	76279
Chrysoperla carnea	car2	>NW_025408289.1 Chrysoperla carnea unplaced genomic scaffold, inChrCarn1.1, whole genome shotgun sequence	76280	98540
Chrysoperla carnea	car2	>NW_025408290.1 Chrysoperla carnea unplaced genomic scaffold, inChrCarn1.1, whole genome shotgun sequence	77739	98719
Chrysoperla carnea	car2	>NW_025408290.1 Chrysoperla carnea unplaced genomic scaffold, inChrCarn1.1, whole genome shotgun sequence	1	77738
Chrysoperla carnea	car2	>NW_025408291.1 Chrysoperla carnea unplaced genomic scaffold, inChrCarn1.1, whole genome shotgun sequence	79019	97980
Chrysoperla carnea	car2	>NW_025408291.1 Chrysoperla carnea unplaced genomic scaffold, inChrCarn1.1, whole genome shotgun sequence	1	79018
Chrysoperla carnea	car2	>NW_025408292.1 Chrysoperla carnea unplaced genomic scaffold, inChrCarn1.1, whole genome shotgun sequence	1	81037
Chrysoperla carnea	car2	>NW_025408293.1 Chrysoperla carnea unplaced genomic scaffold, inChrCarn1.1, whole genome shotgun sequence	84850	94074
Chrysoperla carnea	car2	>NW_025408294.1 Chrysoperla carnea unplaced genomic scaffold, inChrCarn1.1, whole genome shotgun sequence	1	90774
Chrysoperla carnea	car2	>NW_025408294.1 Chrysoperla carnea unplaced genomic scaffold, inChrCarn1.1, whole genome shotgun sequence	90775	92304
Chrysoperla carnea	car2	>NW_025408295.1 Chrysoperla carnea unplaced genomic scaffold, inChrCarn1.1, whole genome shotgun sequence	1	88622
Chrysoperla carnea	car2	>NW_025408296.1 Chrysoperla carnea unplaced genomic scaffold, inChrCarn1.1, whole genome shotgun sequence	9847	88100
Chrysoperla carnea	car2	>NW_025408296.1 Chrysoperla carnea unplaced genomic scaffold, inChrCarn1.1, whole genome shotgun sequence	1	9846
Chrysoperla carnea	car2	>NW_025408297.1 Chrysoperla carnea unplaced genomic scaffold, inChrCarn1.1, whole genome shotgun sequence	1	21745
Chrysoperla carnea	car2	>NW_025408298.1 Chrysoperla carnea unplaced genomic scaffold, inChrCarn1.1, whole genome shotgun sequence	34842	86830
Chrysoperla carnea	car2	>NW_025408299.1 Chrysoperla carnea unplaced genomic scaffold, inChrCarn1.1, whole genome shotgun sequence	48011	85668
Chrysoperla carnea	car2	>NW_025408299.1 Chrysoperla carnea unplaced genomic scaffold, inChrCarn1.1, whole genome shotgun sequence	1	48010
Chrysoperla carnea	car2	>NW_025408300.1 Chrysoperla carnea unplaced genomic scaffold, inChrCarn1.1, whole genome shotgun sequence	62342	84899
Chrysoperla carnea	car2	>NW_025408300.1 Chrysoperla carnea unplaced genomic scaffold, inChrCarn1.1, whole genome shotgun sequence	1	62341
Chrysoperla carnea	car2	>NW_025408301.1 Chrysoperla carnea unplaced genomic scaffold, inChrCarn1.1, whole genome shotgun sequence	1	77441
Chrysoperla carnea	car2	>NW_025408301.1 Chrysoperla carnea unplaced genomic scaffold, inChrCarn1.1, whole genome shotgun sequence	77442	84614
Chrysoperla carnea	car2	>NW_025408302.1 Chrysoperla carnea unplaced genomic scaffold, inChrCarn1.1, whole genome shotgun sequence	1	80960
Chrysoperla carnea	car2	>NW_025408303.1 Chrysoperla carnea unplaced genomic scaffold, inChrCarn1.1, whole genome shotgun sequence	11866	78678
Chrysoperla carnea	car2	>NW_025408303.1 Chrysoperla carnea unplaced genomic scaffold, inChrCarn1.1, whole genome shotgun sequence	1	11865
Chrysoperla carnea	car2	>NW_025408304.1 Chrysoperla carnea unplaced genomic scaffold, inChrCarn1.1, whole genome shotgun sequence	33187	77440
Chrysoperla carnea	car2	>NW_025408304.1 Chrysoperla carnea unplaced genomic scaffold, inChrCarn1.1, whole genome shotgun sequence	1	33186
Chrysoperla carnea	car2	>NW_025408305.1 Chrysoperla carnea unplaced genomic scaffold, inChrCarn1.1, whole genome shotgun sequence	1	55745
Chrysoperla carnea	car2	>NW_025408305.1 Chrysoperla carnea unplaced genomic scaffold, inChrCarn1.1, whole genome shotgun sequence	55746	77775
Chrysoperla carnea	car2	>NW_025408306.1 Chrysoperla carnea unplaced genomic scaffold, inChrCarn1.1, whole genome shotgun sequence	1	72391
Chrysoperla carnea	car2	>NW_025408307.1 Chrysoperla carnea unplaced genomic scaffold, inChrCarn1.1, whole genome shotgun sequence	5578	72231
Chrysoperla carnea	car2	>NW_025408307.1 Chrysoperla carnea unplaced genomic scaffold, inChrCarn1.1, whole genome shotgun sequence	1	5577
Chrysoperla carnea	car2	>NW_025408308.1 Chrysoperla carnea unplaced genomic scaffold, inChrCarn1.1, whole genome shotgun sequence	1	33345
Chrysoperla carnea	car2	>NW_025408308.1 Chrysoperla carnea unplaced genomic scaffold, inChrCarn1.1, whole genome shotgun sequence	33346	71585
Chrysoperla carnea	car2	>NW_025408309.1 Chrysoperla carnea unplaced genomic scaffold, inChrCarn1.1, whole genome shotgun sequence	61760	71300
Chrysoperla carnea	car2	>NW_025408309.1 Chrysoperla carnea unplaced genomic scaffold, inChrCarn1.1, whole genome shotgun sequence	1	61759
Chrysoperla carnea	car2	>NW_025408310.1 Chrysoperla carnea unplaced genomic scaffold, inChrCarn1.1, whole genome shotgun sequence	1	70674
Chrysoperla carnea	car2	>NW_025408311.1 Chrysoperla carnea unplaced genomic scaffold, inChrCarn1.1, whole genome shotgun sequence	19784	70126
Chrysoperla carnea	car2	>NW_025408311.1 Chrysoperla carnea unplaced genomic scaffold, inChrCarn1.1, whole genome shotgun sequence	1	19783
Chrysoperla carnea	car2	>NW_025408312.1 Chrysoperla carnea unplaced genomic scaffold, inChrCarn1.1, whole genome shotgun sequence	1	49656
Chrysoperla carnea	car2	>NW_025408312.1 Chrysoperla carnea unplaced genomic scaffold, inChrCarn1.1, whole genome shotgun sequence	49657	70020
Chrysoperla carnea	car2	>NW_025408313.1 Chrysoperla carnea unplaced genomic scaffold, inChrCarn1.1, whole genome shotgun sequence	1	65677
Chrysoperla carnea	car2	>NW_025408314.1 Chrysoperla carnea unplaced genomic scaffold, inChrCarn1.1, whole genome shotgun sequence	13958	64942
Chrysoperla carnea	car2	>NW_025408314.1 Chrysoperla carnea unplaced genomic scaffold, inChrCarn1.1, whole genome shotgun sequence	1	13957
Chrysoperla carnea	car2	>NW_025408315.1 Chrysoperla carnea unplaced genomic scaffold, inChrCarn1.1, whole genome shotgun sequence	49015	64521
Chrysoperla carnea	car2	>NW_025408315.1 Chrysoperla carnea unplaced genomic scaffold, inChrCarn1.1, whole genome shotgun sequence	1	49014
Chrysoperla carnea	car2	>NW_025408316.1 Chrysoperla carnea unplaced genomic scaffold, inChrCarn1.1, whole genome shotgun sequence	1	62346
Chrysoperla carnea	car2	>NW_025408317.1 Chrysoperla carnea unplaced genomic scaffold, inChrCarn1.1, whole genome shotgun sequence	1	22145
Chrysoperla carnea	car2	>NW_025408317.1 Chrysoperla carnea unplaced genomic scaffold, inChrCarn1.1, whole genome shotgun sequence	22146	61411
Chrysoperla carnea	car2	>NW_025408318.1 Chrysoperla carnea unplaced genomic scaffold, inChrCarn1.1, whole genome shotgun sequence	1	60418
Chrysoperla carnea	car2	>NW_025408319.1 Chrysoperla carnea unplaced genomic scaffold, inChrCarn1.1, whole genome shotgun sequence	315	59094
Chrysoperla carnea	car2	>NW_025408319.1 Chrysoperla carnea unplaced genomic scaffold, inChrCarn1.1, whole genome shotgun sequence	1	314
Chrysoperla carnea	car2	>NW_025408320.1 Chrysoperla carnea unplaced genomic scaffold, inChrCarn1.1, whole genome shotgun sequence	1	41219
Chrysoperla carnea	car2	>NW_025408320.1 Chrysoperla carnea unplaced genomic scaffold, inChrCarn1.1, whole genome shotgun sequence	41220	58711
Chrysoperla carnea	car2	>NW_025408321.1 Chrysoperla carnea unplaced genomic scaffold, inChrCarn1.1, whole genome shotgun sequence	1	58146
Chrysoperla carnea	car2	>NW_025408322.1 Chrysoperla carnea unplaced genomic scaffold, inChrCarn1.1, whole genome shotgun sequence	24361	57683
Chrysoperla carnea	car2	>NW_025408322.1 Chrysoperla carnea unplaced genomic scaffold, inChrCarn1.1, whole genome shotgun sequence	1	24360
Chrysoperla carnea	car2	>NW_025408323.1 Chrysoperla carnea unplaced genomic scaffold, inChrCarn1.1, whole genome shotgun sequence	1	57002
Chrysoperla carnea	car2	>NW_025408324.1 Chrysoperla carnea unplaced genomic scaffold, inChrCarn1.1, whole genome shotgun sequence	1	9673
Chrysoperla carnea	car2	>NW_025408324.1 Chrysoperla carnea unplaced genomic scaffold, inChrCarn1.1, whole genome shotgun sequence	9674	54676
Chrysoperla carnea	car2	>NW_025408325.1 Chrysoperla carnea unplaced genomic scaffold, inChrCarn1.1, whole genome shotgun sequence	1	52366
Chrysoperla carnea	car2	>NW_025408326.1 Chrysoperla carnea unplaced genomic scaffold, inChrCarn1.1, whole genome shotgun sequence	1	2629
Chrysoperla carnea	car2	>NW_025408326.1 Chrysoperla carnea unplaced genomic scaffold, inChrCarn1.1, whole genome shotgun sequence	2630	50053
Chrysoperla carnea	car2	>NW_025408327.1 Chrysoperla carnea unplaced genomic scaffold, inChrCarn1.1, whole genome shotgun sequence	1	48816
Chrysoperla carnea	car2	>NW_025408328.1 Chrysoperla carnea unplaced genomic scaffold, inChrCarn1.1, whole genome shotgun sequence	3759	47904
Chrysoperla carnea	car2	>NW_025408328.1 Chrysoperla carnea unplaced genomic scaffold, inChrCarn1.1, whole genome shotgun sequence	1	3758
Chrysoperla carnea	car2	>NW_025408329.1 Chrysoperla carnea unplaced genomic scaffold, inChrCarn1.1, whole genome shotgun sequence	1	47099
Chrysoperla carnea	car2	>NW_025408330.1 Chrysoperla carnea unplaced genomic scaffold, inChrCarn1.1, whole genome shotgun sequence	1	8753
Chrysoperla carnea	car2	>NW_025408330.1 Chrysoperla carnea unplaced genomic scaffold, inChrCarn1.1, whole genome shotgun sequence	8754	46810
Chrysoperla carnea	car2	>NW_025408331.1 Chrysoperla carnea unplaced genomic scaffold, inChrCarn1.1, whole genome shotgun sequence	1	46176
Chrysoperla carnea	car2	>NW_025408332.1 Chrysoperla carnea unplaced genomic scaffold, inChrCarn1.1, whole genome shotgun sequence	1	15765
Chrysoperla carnea	car2	>NW_025408332.1 Chrysoperla carnea unplaced genomic scaffold, inChrCarn1.1, whole genome shotgun sequence	15766	45666
Chrysoperla carnea	car2	>NW_025408333.1 Chrysoperla carnea unplaced genomic scaffold, inChrCarn1.1, whole genome shotgun sequence	1	45236
Chrysoperla carnea	car2	>NW_025408334.1 Chrysoperla carnea unplaced genomic scaffold, inChrCarn1.1, whole genome shotgun sequence	1	24861
Chrysoperla carnea	car2	>NW_025408334.1 Chrysoperla carnea unplaced genomic scaffold, inChrCarn1.1, whole genome shotgun sequence	24862	45085
Chrysoperla carnea	car2	>NW_025408335.1 Chrysoperla carnea unplaced genomic scaffold, inChrCarn1.1, whole genome shotgun sequence	1	44828
Chrysoperla carnea	car2	>NW_025408336.1 Chrysoperla carnea unplaced genomic scaffold, inChrCarn1.1, whole genome shotgun sequence	34947	43822
Chrysoperla carnea	car2	>NW_025408336.1 Chrysoperla carnea unplaced genomic scaffold, inChrCarn1.1, whole genome shotgun sequence	1	34946
Chrysoperla carnea	car2	>NW_025408337.1 Chrysoperla carnea unplaced genomic scaffold, inChrCarn1.1, whole genome shotgun sequence	1	43653
Chrysoperla carnea	car2	>NW_025408338.1 Chrysoperla carnea unplaced genomic scaffold, inChrCarn1.1, whole genome shotgun sequence	1	43334
Chrysoperla carnea	car2	>NW_025408339.1 Chrysoperla carnea unplaced genomic scaffold, inChrCarn1.1, whole genome shotgun sequence	1	4134
Chrysoperla carnea	car2	>NW_025408339.1 Chrysoperla carnea unplaced genomic scaffold, inChrCarn1.1, whole genome shotgun sequence	4135	41901
Chrysoperla carnea	car2	>NW_025408340.1 Chrysoperla carnea unplaced genomic scaffold, inChrCarn1.1, whole genome shotgun sequence	1	41658
Chrysoperla carnea	car2	>NW_025408341.1 Chrysoperla carnea unplaced genomic scaffold, inChrCarn1.1, whole genome shotgun sequence	20574	41069
Chrysoperla carnea	car2	>NW_025408341.1 Chrysoperla carnea unplaced genomic scaffold, inChrCarn1.1, whole genome shotgun sequence	1	20573
Chrysoperla carnea	car2	>NW_025408342.1 Chrysoperla carnea unplaced genomic scaffold, inChrCarn1.1, whole genome shotgun sequence	1	40540
Chrysoperla carnea	car2	>NW_025408343.1 Chrysoperla carnea unplaced genomic scaffold, inChrCarn1.1, whole genome shotgun sequence	1	38962
Chrysoperla carnea	car2	>NW_025408343.1 Chrysoperla carnea unplaced genomic scaffold, inChrCarn1.1, whole genome shotgun sequence	38963	40040
Chrysoperla carnea	car2	>NW_025408344.1 Chrysoperla carnea unplaced genomic scaffold, inChrCarn1.1, whole genome shotgun sequence	1	39602
Chrysoperla carnea	car2	>NW_025408345.1 Chrysoperla carnea unplaced genomic scaffold, inChrCarn1.1, whole genome shotgun sequence	1	39133
Chrysoperla carnea	car2	>NW_025408346.1 Chrysoperla carnea unplaced genomic scaffold, inChrCarn1.1, whole genome shotgun sequence	20185	38132
Chrysoperla carnea	car2	>NW_025408346.1 Chrysoperla carnea unplaced genomic scaffold, inChrCarn1.1, whole genome shotgun sequence	1	20184
Chrysoperla carnea	car2	>NW_025408347.1 Chrysoperla carnea unplaced genomic scaffold, inChrCarn1.1, whole genome shotgun sequence	1	38011
Chrysoperla carnea	car2	>NW_025408348.1 Chrysoperla carnea unplaced genomic scaffold, inChrCarn1.1, whole genome shotgun sequence	1	37171
Chrysoperla carnea	car2	>NW_025408349.1 Chrysoperla carnea unplaced genomic scaffold, inChrCarn1.1, whole genome shotgun sequence	6868	35496
Chrysoperla carnea	car2	>NW_025408349.1 Chrysoperla carnea unplaced genomic scaffold, inChrCarn1.1, whole genome shotgun sequence	1	6867
Chrysoperla carnea	car2	>NW_025408350.1 Chrysoperla carnea unplaced genomic scaffold, inChrCarn1.1, whole genome shotgun sequence	1	34234
Chrysoperla carnea	car2	>NW_025408351.1 Chrysoperla carnea unplaced genomic scaffold, inChrCarn1.1, whole genome shotgun sequence	1	33820
Chrysoperla carnea	car2	>NW_025408352.1 Chrysoperla carnea unplaced genomic scaffold, inChrCarn1.1, whole genome shotgun sequence	1	3314
Chrysoperla carnea	car2	>NW_025408352.1 Chrysoperla carnea unplaced genomic scaffold, inChrCarn1.1, whole genome shotgun sequence	3315	33697
Chrysoperla carnea	car2	>NW_025408353.1 Chrysoperla carnea unplaced genomic scaffold, inChrCarn1.1, whole genome shotgun sequence	1	32804
Chrysoperla carnea	car2	>NW_025408354.1 Chrysoperla carnea unplaced genomic scaffold, inChrCarn1.1, whole genome shotgun sequence	1	32192
Chrysoperla carnea	car2	>NW_025408355.1 Chrysoperla carnea unplaced genomic scaffold, inChrCarn1.1, whole genome shotgun sequence	4619	32006
Chrysoperla carnea	car2	>NW_025408355.1 Chrysoperla carnea unplaced genomic scaffold, inChrCarn1.1, whole genome shotgun sequence	1	4618
Chrysoperla carnea	car2	>NW_025408356.1 Chrysoperla carnea unplaced genomic scaffold, inChrCarn1.1, whole genome shotgun sequence	1	31903
Chrysoperla carnea	car2	>NW_025408357.1 Chrysoperla carnea unplaced genomic scaffold, inChrCarn1.1, whole genome shotgun sequence	1	31320
Chrysoperla carnea	car2	>NW_025408358.1 Chrysoperla carnea unplaced genomic scaffold, inChrCarn1.1, whole genome shotgun sequence	9387	31030
Chrysoperla carnea	car2	>NW_025408358.1 Chrysoperla carnea unplaced genomic scaffold, inChrCarn1.1, whole genome shotgun sequence	1	9386
Chrysoperla carnea	car2	>NW_025408359.1 Chrysoperla carnea unplaced genomic scaffold, inChrCarn1.1, whole genome shotgun sequence	1	30686
Chrysoperla carnea	car2	>NW_025408360.1 Chrysoperla carnea unplaced genomic scaffold, inChrCarn1.1, whole genome shotgun sequence	1	29711
Chrysoperla carnea	car2	>NW_025408361.1 Chrysoperla carnea unplaced genomic scaffold, inChrCarn1.1, whole genome shotgun sequence	1	17956
Chrysoperla carnea	car2	>NW_025408361.1 Chrysoperla carnea unplaced genomic scaffold, inChrCarn1.1, whole genome shotgun sequence	17957	28182
Chrysoperla carnea	car2	>NW_025408362.1 Chrysoperla carnea unplaced genomic scaffold, inChrCarn1.1, whole genome shotgun sequence	1	28105
Chrysoperla carnea	car2	>NW_025408363.1 Chrysoperla carnea unplaced genomic scaffold, inChrCarn1.1, whole genome shotgun sequence	1	27701
Chrysoperla carnea	car2	>NW_025408364.1 Chrysoperla carnea unplaced genomic scaffold, inChrCarn1.1, whole genome shotgun sequence	1	27078
Chrysoperla carnea	car2	>NW_025408365.1 Chrysoperla carnea unplaced genomic scaffold, inChrCarn1.1, whole genome shotgun sequence	6887	26556
Chrysoperla carnea	car2	>NW_025408365.1 Chrysoperla carnea unplaced genomic scaffold, inChrCarn1.1, whole genome shotgun sequence	1	6886
Chrysoperla carnea	car2	>NW_025408366.1 Chrysoperla carnea unplaced genomic scaffold, inChrCarn1.1, whole genome shotgun sequence	1	26224
Chrysoperla carnea	car2	>NW_025408367.1 Chrysoperla carnea unplaced genomic scaffold, inChrCarn1.1, whole genome shotgun sequence	1	26002
Chrysoperla carnea	car2	>NW_025408368.1 Chrysoperla carnea unplaced genomic scaffold, inChrCarn1.1, whole genome shotgun sequence	1	25073
Chrysoperla carnea	car2	>NW_025408369.1 Chrysoperla carnea unplaced genomic scaffold, inChrCarn1.1, whole genome shotgun sequence	1	3027
Chrysoperla carnea	car2	>NW_025408369.1 Chrysoperla carnea unplaced genomic scaffold, inChrCarn1.1, whole genome shotgun sequence	3028	23752
Chrysoperla carnea	car2	>NW_025408370.1 Chrysoperla carnea unplaced genomic scaffold, inChrCarn1.1, whole genome shotgun sequence	1	23576
Chrysoperla carnea	car2	>NW_025408371.1 Chrysoperla carnea unplaced genomic scaffold, inChrCarn1.1, whole genome shotgun sequence	1	23242
Chrysoperla carnea	car2	>NW_025408372.1 Chrysoperla carnea unplaced genomic scaffold, inChrCarn1.1, whole genome shotgun sequence	1	22810
Chrysoperla carnea	car2	>NW_025408373.1 Chrysoperla carnea unplaced genomic scaffold, inChrCarn1.1, whole genome shotgun sequence	1	9643
Ischnura elegans	ele1	>NC_060246.1 Ischnura elegans chromosome 1, ioIscEleg1.1, whole genome shotgun sequence	16600001	16700000
Ischnura elegans	ele1	>NC_060246.1 Ischnura elegans chromosome 1, ioIscEleg1.1, whole genome shotgun sequence	107600001	107700000
Ischnura elegans	ele1	>NC_060246.1 Ischnura elegans chromosome 1, ioIscEleg1.1, whole genome shotgun sequence	16500001	16600000
Ischnura elegans	ele1	>NC_060246.1 Ischnura elegans chromosome 1, ioIscEleg1.1, whole genome shotgun sequence	158500001	158600000
Ischnura elegans	ele1	>NC_060246.1 Ischnura elegans chromosome 1, ioIscEleg1.1, whole genome shotgun sequence	16700001	16800000
Ischnura elegans	ele1	>NC_060246.1 Ischnura elegans chromosome 1, ioIscEleg1.1, whole genome shotgun sequence	157200001	157300000
Ischnura elegans	ele1	>NC_060246.1 Ischnura elegans chromosome 1, ioIscEleg1.1, whole genome shotgun sequence	158600001	158700000
Ischnura elegans	ele1	>NC_060247.1 Ischnura elegans chromosome 2, ioIscEleg1.1, whole genome shotgun sequence	15924018	16024017
Ischnura elegans	ele1	>NC_060247.1 Ischnura elegans chromosome 2, ioIscEleg1.1, whole genome shotgun sequence	29324018	29424017
Ischnura elegans	ele1	>NC_060247.1 Ischnura elegans chromosome 2, ioIscEleg1.1, whole genome shotgun sequence	29424018	29524017
Ischnura elegans	ele1	>NC_060247.1 Ischnura elegans chromosome 2, ioIscEleg1.1, whole genome shotgun sequence	116724018	116824017
Ischnura elegans	ele1	>NC_060247.1 Ischnura elegans chromosome 2, ioIscEleg1.1, whole genome shotgun sequence	29224018	29324017
Ischnura elegans	ele1	>NC_060247.1 Ischnura elegans chromosome 2, ioIscEleg1.1, whole genome shotgun sequence	117324018	117424017
Ischnura elegans	ele1	>NC_060247.1 Ischnura elegans chromosome 2, ioIscEleg1.1, whole genome shotgun sequence	117424018	117524017
Ischnura elegans	ele1	>NC_060247.1 Ischnura elegans chromosome 2, ioIscEleg1.1, whole genome shotgun sequence	15824018	15924017
Ischnura elegans	ele1	>NC_060248.1 Ischnura elegans chromosome 3, ioIscEleg1.1, whole genome shotgun sequence	126225825	126325824
Ischnura elegans	ele1	>NC_060248.1 Ischnura elegans chromosome 3, ioIscEleg1.1, whole genome shotgun sequence	120725825	120825824
Ischnura elegans	ele1	>NC_060248.1 Ischnura elegans chromosome 3, ioIscEleg1.1, whole genome shotgun sequence	15525825	15625824
Ischnura elegans	ele1	>NC_060248.1 Ischnura elegans chromosome 3, ioIscEleg1.1, whole genome shotgun sequence	16025825	16125824
Ischnura elegans	ele1	>NC_060248.1 Ischnura elegans chromosome 3, ioIscEleg1.1, whole genome shotgun sequence	126125825	126225824
Ischnura elegans	ele1	>NC_060249.1 Ischnura elegans chromosome 4, ioIscEleg1.1, whole genome shotgun sequence	125887071	125987070
Ischnura elegans	ele1	>NC_060249.1 Ischnura elegans chromosome 4, ioIscEleg1.1, whole genome shotgun sequence	21187071	21287070
Ischnura elegans	ele1	>NC_060249.1 Ischnura elegans chromosome 4, ioIscEleg1.1, whole genome shotgun sequence	118787071	118887070
Ischnura elegans	ele1	>NC_060249.1 Ischnura elegans chromosome 4, ioIscEleg1.1, whole genome shotgun sequence	125987071	126087070
Ischnura elegans	ele1	>NC_060250.1 Ischnura elegans chromosome 5, ioIscEleg1.1, whole genome shotgun sequence	116413920	116513919
Ischnura elegans	ele1	>NC_060250.1 Ischnura elegans chromosome 5, ioIscEleg1.1, whole genome shotgun sequence	115813920	115913919
Ischnura elegans	ele1	>NC_060250.1 Ischnura elegans chromosome 5, ioIscEleg1.1, whole genome shotgun sequence	30113920	30213919
Ischnura elegans	ele1	>NC_060250.1 Ischnura elegans chromosome 5, ioIscEleg1.1, whole genome shotgun sequence	23913920	24013919
Ischnura elegans	ele1	>NC_060251.1 Ischnura elegans chromosome 6, ioIscEleg1.1, whole genome shotgun sequence	17982364	18082363
Ischnura elegans	ele1	>NC_060251.1 Ischnura elegans chromosome 6, ioIscEleg1.1, whole genome shotgun sequence	17882364	17982363
Ischnura elegans	ele1	>NC_060251.1 Ischnura elegans chromosome 6, ioIscEleg1.1, whole genome shotgun sequence	102882364	102982363
Ischnura elegans	ele1	>NC_060251.1 Ischnura elegans chromosome 6, ioIscEleg1.1, whole genome shotgun sequence	102982364	103082363
Ischnura elegans	ele1	>NC_060252.1 Ischnura elegans chromosome 7, ioIscEleg1.1, whole genome shotgun sequence	21279473	21379472
Ischnura elegans	ele1	>NC_060252.1 Ischnura elegans chromosome 7, ioIscEleg1.1, whole genome shotgun sequence	21479473	21579472
Ischnura elegans	ele1	>NC_060252.1 Ischnura elegans chromosome 7, ioIscEleg1.1, whole genome shotgun sequence	21379473	21479472
Ischnura elegans	ele1	>NC_060253.1 Ischnura elegans chromosome 8, ioIscEleg1.1, whole genome shotgun sequence	21676783	21776782
Ischnura elegans	ele1	>NC_060253.1 Ischnura elegans chromosome 8, ioIscEleg1.1, whole genome shotgun sequence	99576783	99676782
Ischnura elegans	ele1	>NC_060253.1 Ischnura elegans chromosome 8, ioIscEleg1.1, whole genome shotgun sequence	10676783	10776782
Ischnura elegans	ele1	>NC_060253.1 Ischnura elegans chromosome 8, ioIscEleg1.1, whole genome shotgun sequence	99676783	99776782
Ischnura elegans	ele1	>NC_060253.1 Ischnura elegans chromosome 8, ioIscEleg1.1, whole genome shotgun sequence	94376783	94476782
Ischnura elegans	ele1	>NC_060253.1 Ischnura elegans chromosome 8, ioIscEleg1.1, whole genome shotgun sequence	10476783	10576782
Ischnura elegans	ele1	>NC_060254.1 Ischnura elegans chromosome 9, ioIscEleg1.1, whole genome shotgun sequence	89757218	89857217
Ischnura elegans	ele1	>NC_060254.1 Ischnura elegans chromosome 9, ioIscEleg1.1, whole genome shotgun sequence	89557218	89657217
Ischnura elegans	ele1	>NC_060254.1 Ischnura elegans chromosome 9, ioIscEleg1.1, whole genome shotgun sequence	89657218	89757217
Ischnura elegans	ele1	>NC_060254.1 Ischnura elegans chromosome 9, ioIscEleg1.1, whole genome shotgun sequence	14757218	14857217
Ischnura elegans	ele1	>NC_060255.1 Ischnura elegans chromosome 10, ioIscEleg1.1, whole genome shotgun sequence	98239143	98339142
Ischnura elegans	ele1	>NC_060255.1 Ischnura elegans chromosome 10, ioIscEleg1.1, whole genome shotgun sequence	98439143	98539142
Ischnura elegans	ele1	>NC_060255.1 Ischnura elegans chromosome 10, ioIscEleg1.1, whole genome shotgun sequence	17639143	17739142
Ischnura elegans	ele1	>NC_060255.1 Ischnura elegans chromosome 10, ioIscEleg1.1, whole genome shotgun sequence	98339143	98439142
Ischnura elegans	ele1	>NC_060255.1 Ischnura elegans chromosome 10, ioIscEleg1.1, whole genome shotgun sequence	17539143	17639142
Ischnura elegans	ele1	>NC_060256.1 Ischnura elegans chromosome 11, ioIscEleg1.1, whole genome shotgun sequence	12119793	12219792
Ischnura elegans	ele1	>NC_060257.1 Ischnura elegans chromosome 12, ioIscEleg1.1, whole genome shotgun sequence	43306139	43406138
Ischnura elegans	ele1	>NC_060257.1 Ischnura elegans chromosome 12, ioIscEleg1.1, whole genome shotgun sequence	9706139	9806138
Ischnura elegans	ele1	>NC_060257.1 Ischnura elegans chromosome 12, ioIscEleg1.1, whole genome shotgun sequence	85206139	85306138
Ischnura elegans	ele1	>NC_060257.1 Ischnura elegans chromosome 12, ioIscEleg1.1, whole genome shotgun sequence	85306139	85406138
Ischnura elegans	ele1	>NC_060257.1 Ischnura elegans chromosome 12, ioIscEleg1.1, whole genome shotgun sequence	43206139	43306138
Ischnura elegans	ele1	>NC_060257.1 Ischnura elegans chromosome 12, ioIscEleg1.1, whole genome shotgun sequence	9606139	9706138
Ischnura elegans	ele1	>NC_060258.1 Ischnura elegans chromosome 13, ioIscEleg1.1, whole genome shotgun sequence	19162321	19262320
Ischnura elegans	ele1	>NC_060258.1 Ischnura elegans chromosome 13, ioIscEleg1.1, whole genome shotgun sequence	15362321	15462320
Ischnura elegans	ele1	>NC_060258.1 Ischnura elegans chromosome 13, ioIscEleg1.1, whole genome shotgun sequence	15462321	15562320
Ischnura elegans	ele1	>NC_060259.1 Ischnura elegans chromosome X, ioIscEleg1.1, whole genome shotgun sequence	99741948	99841947
Ischnura elegans	ele1	>NC_060259.1 Ischnura elegans chromosome X, ioIscEleg1.1, whole genome shotgun sequence	18041948	18141947
Ischnura elegans	ele1	>NC_060259.1 Ischnura elegans chromosome X, ioIscEleg1.1, whole genome shotgun sequence	5341948	5441947
Ischnura elegans	ele1	>NC_060259.1 Ischnura elegans chromosome X, ioIscEleg1.1, whole genome shotgun sequence	99541948	99641947
Ischnura elegans	ele1	>NC_060259.1 Ischnura elegans chromosome X, ioIscEleg1.1, whole genome shotgun sequence	99641948	99741947
Ischnura elegans	ele1	>NW_025791660.1 Ischnura elegans chromosome 13 unlocalized genomic scaffold, ioIscEleg1.1 SUPER_13_unloc_4, whole genome shotgun sequence	124860	224859
Ischnura elegans	ele1	>NW_025791660.1 Ischnura elegans chromosome 13 unlocalized genomic scaffold, ioIscEleg1.1 SUPER_13_unloc_4, whole genome shotgun sequence	24860	124859
Ischnura elegans	ele1	>NW_025791660.1 Ischnura elegans chromosome 13 unlocalized genomic scaffold, ioIscEleg1.1 SUPER_13_unloc_4, whole genome shotgun sequence	224860	324859
Ischnura elegans	ele1	>NW_025791733.1 Ischnura elegans unplaced genomic scaffold, ioIscEleg1.1, whole genome shotgun sequence	44105	51508
Ischnura elegans	ele1	>NW_025791734.1 Ischnura elegans unplaced genomic scaffold, ioIscEleg1.1, whole genome shotgun sequence	1	92595
Ischnura elegans	ele2	>NC_060247.1 Ischnura elegans chromosome 2, ioIscEleg1.1, whole genome shotgun sequence	116824018	116924017
Ischnura elegans	ele2	>NC_060248.1 Ischnura elegans chromosome 3, ioIscEleg1.1, whole genome shotgun sequence	15825825	15925824
Ischnura elegans	ele2	>NC_060248.1 Ischnura elegans chromosome 3, ioIscEleg1.1, whole genome shotgun sequence	15925825	16025824
Ischnura elegans	ele2	>NC_060249.1 Ischnura elegans chromosome 4, ioIscEleg1.1, whole genome shotgun sequence	15487071	15587070
Ischnura elegans	ele2	>NC_060249.1 Ischnura elegans chromosome 4, ioIscEleg1.1, whole genome shotgun sequence	15587071	15687070
Ischnura elegans	ele2	>NC_060249.1 Ischnura elegans chromosome 4, ioIscEleg1.1, whole genome shotgun sequence	15287071	15387070
Ischnura elegans	ele2	>NC_060249.1 Ischnura elegans chromosome 4, ioIscEleg1.1, whole genome shotgun sequence	15187071	15287070
Ischnura elegans	ele2	>NC_060249.1 Ischnura elegans chromosome 4, ioIscEleg1.1, whole genome shotgun sequence	15687071	15787070
Ischnura elegans	ele2	>NC_060249.1 Ischnura elegans chromosome 4, ioIscEleg1.1, whole genome shotgun sequence	15387071	15487070
Ischnura elegans	ele2	>NC_060250.1 Ischnura elegans chromosome 5, ioIscEleg1.1, whole genome shotgun sequence	115913920	116013919
Ischnura elegans	ele2	>NC_060250.1 Ischnura elegans chromosome 5, ioIscEleg1.1, whole genome shotgun sequence	116013920	116113919
Ischnura elegans	ele2	>NC_060250.1 Ischnura elegans chromosome 5, ioIscEleg1.1, whole genome shotgun sequence	116313920	116413919
Ischnura elegans	ele2	>NC_060250.1 Ischnura elegans chromosome 5, ioIscEleg1.1, whole genome shotgun sequence	116213920	116313919
Ischnura elegans	ele2	>NC_060250.1 Ischnura elegans chromosome 5, ioIscEleg1.1, whole genome shotgun sequence	116113920	116213919
Ischnura elegans	ele2	>NC_060251.1 Ischnura elegans chromosome 6, ioIscEleg1.1, whole genome shotgun sequence	103082364	103182363
Ischnura elegans	ele2	>NC_060251.1 Ischnura elegans chromosome 6, ioIscEleg1.1, whole genome shotgun sequence	18282364	18382363
Ischnura elegans	ele2	>NC_060251.1 Ischnura elegans chromosome 6, ioIscEleg1.1, whole genome shotgun sequence	18182364	18282363
Ischnura elegans	ele2	>NC_060251.1 Ischnura elegans chromosome 6, ioIscEleg1.1, whole genome shotgun sequence	18082364	18182363
Ischnura elegans	ele2	>NC_060252.1 Ischnura elegans chromosome 7, ioIscEleg1.1, whole genome shotgun sequence	102479473	102579472
Ischnura elegans	ele2	>NC_060255.1 Ischnura elegans chromosome 10, ioIscEleg1.1, whole genome shotgun sequence	17739143	17839142
Ischnura elegans	ele2	>NC_060257.1 Ischnura elegans chromosome 12, ioIscEleg1.1, whole genome shotgun sequence	80806139	80906138
Ischnura elegans	ele2	>NC_060258.1 Ischnura elegans chromosome 13, ioIscEleg1.1, whole genome shotgun sequence	15262321	15362320
Ischnura elegans	ele2	>NC_060259.1 Ischnura elegans chromosome X, ioIscEleg1.1, whole genome shotgun sequence	17841948	17941947
Ischnura elegans	ele2	>NW_025791658.1 Ischnura elegans chromosome 13 unlocalized genomic scaffold, ioIscEleg1.1 SUPER_13_unloc_2, whole genome shotgun sequence	7483606	7583605
Ischnura elegans	ele2	>NW_025791658.1 Ischnura elegans chromosome 13 unlocalized genomic scaffold, ioIscEleg1.1 SUPER_13_unloc_2, whole genome shotgun sequence	7583606	7683605
Ischnura elegans	ele2	>NW_025791725.1 Ischnura elegans unplaced genomic scaffold, ioIscEleg1.1, whole genome shotgun sequence	247621	313879
Ischnura elegans	ele2	>NW_025791725.1 Ischnura elegans unplaced genomic scaffold, ioIscEleg1.1, whole genome shotgun sequence	147621	247620
Ischnura elegans	ele2	>NW_025791726.1 Ischnura elegans unplaced genomic scaffold, ioIscEleg1.1, whole genome shotgun sequence	1	33740
Schistocerca americana	ame1	>CM038237.1 Schistocerca americana isolate TAMUIC-IGC-003095 chromosome 4, whole genome shotgun sequence	222153143	222253142
Schistocerca americana	ame1	>CM038238.1 Schistocerca americana isolate TAMUIC-IGC-003095 chromosome 5, whole genome shotgun sequence	619195960	619295959
Schistocerca americana	ame1	>CM038238.1 Schistocerca americana isolate TAMUIC-IGC-003095 chromosome 5, whole genome shotgun sequence	570795960	570895959
Schistocerca americana	ame1	>CM038238.1 Schistocerca americana isolate TAMUIC-IGC-003095 chromosome 5, whole genome shotgun sequence	619295960	619395959
Schistocerca americana	ame1	>CM038242.1 Schistocerca americana isolate TAMUIC-IGC-003095 chromosome 9, whole genome shotgun sequence	61496262	61596261
Schistocerca americana	ame1	>CM038244.1 Schistocerca americana isolate TAMUIC-IGC-003095 chromosome 11, whole genome shotgun sequence	93472823	93572822
Schistocerca americana	ame1	>CM038244.1 Schistocerca americana isolate TAMUIC-IGC-003095 chromosome 11, whole genome shotgun sequence	98472823	98572822
Schistocerca americana	ame1	>CM038244.1 Schistocerca americana isolate TAMUIC-IGC-003095 chromosome 11, whole genome shotgun sequence	103072823	103172822
Schistocerca americana	ame1	>CM038244.1 Schistocerca americana isolate TAMUIC-IGC-003095 chromosome 11, whole genome shotgun sequence	163872823	163972822
Schistocerca americana	ame1	>CM038244.1 Schistocerca americana isolate TAMUIC-IGC-003095 chromosome 11, whole genome shotgun sequence	184472823	184572822
Schistocerca americana	ame1	>CM038244.1 Schistocerca americana isolate TAMUIC-IGC-003095 chromosome 11, whole genome shotgun sequence	103272823	103372822
Schistocerca americana	ame1	>CM038244.1 Schistocerca americana isolate TAMUIC-IGC-003095 chromosome 11, whole genome shotgun sequence	93372823	93472822
Schistocerca americana	ame1	>CM038244.1 Schistocerca americana isolate TAMUIC-IGC-003095 chromosome 11, whole genome shotgun sequence	163672823	163772822
Schistocerca americana	ame1	>CM038244.1 Schistocerca americana isolate TAMUIC-IGC-003095 chromosome 11, whole genome shotgun sequence	163772823	163872822
Schistocerca americana	ame1	>CM038244.1 Schistocerca americana isolate TAMUIC-IGC-003095 chromosome 11, whole genome shotgun sequence	105172823	105272822
Schistocerca americana	ame1	>CM038244.1 Schistocerca americana isolate TAMUIC-IGC-003095 chromosome 11, whole genome shotgun sequence	103172823	103272822
Schistocerca americana	ame1	>CM038245.1 Schistocerca americana isolate TAMUIC-IGC-003095 chromosome X, whole genome shotgun sequence	266439101	266539100
Schistocerca americana	ame1	>CM038245.1 Schistocerca americana isolate TAMUIC-IGC-003095 chromosome X, whole genome shotgun sequence	266339101	266439100
Limnephilus lunatus	lun1	>OU830592.1 Limnephilus lunatus genome assembly, chromosome: 1	114301083	114401082
Limnephilus lunatus	lun1	>OU830592.1 Limnephilus lunatus genome assembly, chromosome: 1	107301083	107401082
Limnephilus lunatus	lun1	>OU830595.1 Limnephilus lunatus genome assembly, chromosome: 4	12346492	12446491
Limnephilus lunatus	lun1	>OU830595.1 Limnephilus lunatus genome assembly, chromosome: 4	5946492	6046491
Limnephilus lunatus	lun1	>OU830595.1 Limnephilus lunatus genome assembly, chromosome: 4	29546492	29646491
Limnephilus lunatus	lun1	>OU830603.1 Limnephilus lunatus genome assembly, chromosome: 12	19051805	19151804
Limnephilus lunatus	lun1	>OU830603.1 Limnephilus lunatus genome assembly, chromosome: 12	8551805	8651804
Limnephilus lunatus	lun1	>OU830604.1 Limnephilus lunatus genome assembly, chromosome: Z	21937356	22037355
Limnephilus lunatus	lun1	>OU830604.1 Limnephilus lunatus genome assembly, chromosome: Z	9137356	9237355
Limnephilus lunatus	lun1	>OU830604.1 Limnephilus lunatus genome assembly, chromosome: Z	41837356	41937355
Limnephilus lunatus	lun2	>CAKJTF020000007.1 Limnephilus lunatus genome assembly, contig: scaffold_78, whole genome shotgun sequence	12966	112965
Limnephilus lunatus	lun2	>CAKJTF020000024.1 Limnephilus lunatus genome assembly, contig: scaffold_766, whole genome shotgun sequence	991	16723
Limnephilus lunatus	lun2	>CAKJTF020000025.1 Limnephilus lunatus genome assembly, contig: scaffold_161, whole genome shotgun sequence	1	83183
Limnephilus lunatus	lun2	>OU830592.1 Limnephilus lunatus genome assembly, chromosome: 1	89701083	89801082
Limnephilus lunatus	lun2	>OU830592.1 Limnephilus lunatus genome assembly, chromosome: 1	1083	101082
Limnephilus lunatus	lun2	>OU830592.1 Limnephilus lunatus genome assembly, chromosome: 1	89801083	89901082
Limnephilus lunatus	lun2	>OU830592.1 Limnephilus lunatus genome assembly, chromosome: 1	1	1082
Limnephilus lunatus	lun2	>OU830592.1 Limnephilus lunatus genome assembly, chromosome: 1	31101083	31201082
Limnephilus lunatus	lun2	>OU830592.1 Limnephilus lunatus genome assembly, chromosome: 1	90001083	90101082
Limnephilus lunatus	lun2	>OU830592.1 Limnephilus lunatus genome assembly, chromosome: 1	31201083	31301082
Limnephilus lunatus	lun2	>OU830592.1 Limnephilus lunatus genome assembly, chromosome: 1	89901083	90001082
Limnephilus lunatus	lun2	>OU830592.1 Limnephilus lunatus genome assembly, chromosome: 1	70801083	70901082
Limnephilus lunatus	lun2	>OU830592.1 Limnephilus lunatus genome assembly, chromosome: 1	114401083	114501082
Limnephilus lunatus	lun2	>OU830592.1 Limnephilus lunatus genome assembly, chromosome: 1	31001083	31101082
Limnephilus lunatus	lun2	>OU830592.1 Limnephilus lunatus genome assembly, chromosome: 1	30901083	31001082
Limnephilus lunatus	lun2	>OU830592.1 Limnephilus lunatus genome assembly, chromosome: 1	101083	201082
Limnephilus lunatus	lun2	>OU830593.1 Limnephilus lunatus genome assembly, chromosome: 2	14186447	14286446
Limnephilus lunatus	lun2	>OU830593.1 Limnephilus lunatus genome assembly, chromosome: 2	83986447	84086446
Limnephilus lunatus	lun2	>OU830593.1 Limnephilus lunatus genome assembly, chromosome: 2	84086447	84186446
Limnephilus lunatus	lun2	>OU830593.1 Limnephilus lunatus genome assembly, chromosome: 2	14286447	14386446
Limnephilus lunatus	lun2	>OU830593.1 Limnephilus lunatus genome assembly, chromosome: 2	28786447	28886446
Limnephilus lunatus	lun2	>OU830593.1 Limnephilus lunatus genome assembly, chromosome: 2	118186447	118188895
Limnephilus lunatus	lun2	>OU830593.1 Limnephilus lunatus genome assembly, chromosome: 2	84186447	84286446
Limnephilus lunatus	lun2	>OU830593.1 Limnephilus lunatus genome assembly, chromosome: 2	13986447	14086446
Limnephilus lunatus	lun2	>OU830593.1 Limnephilus lunatus genome assembly, chromosome: 2	14086447	14186446
Limnephilus lunatus	lun2	>OU830593.1 Limnephilus lunatus genome assembly, chromosome: 2	84286447	84386446
Limnephilus lunatus	lun2	>OU830593.1 Limnephilus lunatus genome assembly, chromosome: 2	117986447	118086446
Limnephilus lunatus	lun2	>OU830593.1 Limnephilus lunatus genome assembly, chromosome: 2	118086447	118186446
Limnephilus lunatus	lun2	>OU830593.1 Limnephilus lunatus genome assembly, chromosome: 2	105386447	105486446
Limnephilus lunatus	lun2	>OU830593.1 Limnephilus lunatus genome assembly, chromosome: 2	13786447	13886446
Limnephilus lunatus	lun2	>OU830593.1 Limnephilus lunatus genome assembly, chromosome: 2	13886447	13986446
Limnephilus lunatus	lun2	>OU830594.1 Limnephilus lunatus genome assembly, chromosome: 3	21597551	21697550
Limnephilus lunatus	lun2	>OU830594.1 Limnephilus lunatus genome assembly, chromosome: 3	95797551	95897550
Limnephilus lunatus	lun2	>OU830594.1 Limnephilus lunatus genome assembly, chromosome: 3	95897551	95997550
Limnephilus lunatus	lun2	>OU830594.1 Limnephilus lunatus genome assembly, chromosome: 3	71397551	71497550
Limnephilus lunatus	lun2	>OU830594.1 Limnephilus lunatus genome assembly, chromosome: 3	1	97550
Limnephilus lunatus	lun2	>OU830594.1 Limnephilus lunatus genome assembly, chromosome: 3	95697551	95797550
Limnephilus lunatus	lun2	>OU830594.1 Limnephilus lunatus genome assembly, chromosome: 3	50897551	50997550
Limnephilus lunatus	lun2	>OU830594.1 Limnephilus lunatus genome assembly, chromosome: 3	114697551	114751058
Limnephilus lunatus	lun2	>OU830594.1 Limnephilus lunatus genome assembly, chromosome: 3	71497551	71597550
Limnephilus lunatus	lun2	>OU830594.1 Limnephilus lunatus genome assembly, chromosome: 3	82697551	82797550
Limnephilus lunatus	lun2	>OU830594.1 Limnephilus lunatus genome assembly, chromosome: 3	82597551	82697550
Limnephilus lunatus	lun2	>OU830595.1 Limnephilus lunatus genome assembly, chromosome: 4	112746492	112840161
Limnephilus lunatus	lun2	>OU830595.1 Limnephilus lunatus genome assembly, chromosome: 4	13846492	13946491
Limnephilus lunatus	lun2	>OU830595.1 Limnephilus lunatus genome assembly, chromosome: 4	13946492	14046491
Limnephilus lunatus	lun2	>OU830595.1 Limnephilus lunatus genome assembly, chromosome: 4	1	46491
Limnephilus lunatus	lun2	>OU830596.1 Limnephilus lunatus genome assembly, chromosome: 5	85806330	85906329
Limnephilus lunatus	lun2	>OU830596.1 Limnephilus lunatus genome assembly, chromosome: 5	1	6329
Limnephilus lunatus	lun2	>OU830596.1 Limnephilus lunatus genome assembly, chromosome: 5	62606330	62706329
Limnephilus lunatus	lun2	>OU830596.1 Limnephilus lunatus genome assembly, chromosome: 5	85606330	85706329
Limnephilus lunatus	lun2	>OU830596.1 Limnephilus lunatus genome assembly, chromosome: 5	104406330	104506329
Limnephilus lunatus	lun2	>OU830596.1 Limnephilus lunatus genome assembly, chromosome: 5	85706330	85806329
Limnephilus lunatus	lun2	>OU830596.1 Limnephilus lunatus genome assembly, chromosome: 5	85506330	85606329
Limnephilus lunatus	lun2	>OU830596.1 Limnephilus lunatus genome assembly, chromosome: 5	40006330	40106329
Limnephilus lunatus	lun2	>OU830596.1 Limnephilus lunatus genome assembly, chromosome: 5	104506330	104606329
Limnephilus lunatus	lun2	>OU830597.1 Limnephilus lunatus genome assembly, chromosome: 6	15627474	15727473
Limnephilus lunatus	lun2	>OU830597.1 Limnephilus lunatus genome assembly, chromosome: 6	78027474	78127473
Limnephilus lunatus	lun2	>OU830597.1 Limnephilus lunatus genome assembly, chromosome: 6	15527474	15627473
Limnephilus lunatus	lun2	>OU830597.1 Limnephilus lunatus genome assembly, chromosome: 6	95327474	95392806
Limnephilus lunatus	lun2	>OU830597.1 Limnephilus lunatus genome assembly, chromosome: 6	78127474	78227473
Limnephilus lunatus	lun2	>OU830597.1 Limnephilus lunatus genome assembly, chromosome: 6	35027474	35127473
Limnephilus lunatus	lun2	>OU830597.1 Limnephilus lunatus genome assembly, chromosome: 6	15727474	15827473
Limnephilus lunatus	lun2	>OU830597.1 Limnephilus lunatus genome assembly, chromosome: 6	77927474	78027473
Limnephilus lunatus	lun2	>OU830598.1 Limnephilus lunatus genome assembly, chromosome: 7	15334667	15434666
Limnephilus lunatus	lun2	>OU830598.1 Limnephilus lunatus genome assembly, chromosome: 7	15434667	15534666
Limnephilus lunatus	lun2	>OU830598.1 Limnephilus lunatus genome assembly, chromosome: 7	94234667	94334666
Limnephilus lunatus	lun2	>OU830598.1 Limnephilus lunatus genome assembly, chromosome: 7	33734667	33834666
Limnephilus lunatus	lun2	>OU830598.1 Limnephilus lunatus genome assembly, chromosome: 7	70734667	70834666
Limnephilus lunatus	lun2	>OU830598.1 Limnephilus lunatus genome assembly, chromosome: 7	94434667	94534666
Limnephilus lunatus	lun2	>OU830598.1 Limnephilus lunatus genome assembly, chromosome: 7	15234667	15334666
Limnephilus lunatus	lun2	>OU830598.1 Limnephilus lunatus genome assembly, chromosome: 7	1	34666
Limnephilus lunatus	lun2	>OU830598.1 Limnephilus lunatus genome assembly, chromosome: 7	94334667	94434666
Limnephilus lunatus	lun2	>OU830598.1 Limnephilus lunatus genome assembly, chromosome: 7	70834667	70934666
Limnephilus lunatus	lun2	>OU830598.1 Limnephilus lunatus genome assembly, chromosome: 7	33834667	33934666
Limnephilus lunatus	lun2	>OU830600.1 Limnephilus lunatus genome assembly, chromosome: 9	70553751	70653750
Limnephilus lunatus	lun2	>OU830600.1 Limnephilus lunatus genome assembly, chromosome: 9	55853751	55953750
Limnephilus lunatus	lun2	>OU830600.1 Limnephilus lunatus genome assembly, chromosome: 9	87553751	87632201
Limnephilus lunatus	lun2	>OU830600.1 Limnephilus lunatus genome assembly, chromosome: 9	70353751	70453750
Limnephilus lunatus	lun2	>OU830600.1 Limnephilus lunatus genome assembly, chromosome: 9	70453751	70553750
Limnephilus lunatus	lun2	>OU830600.1 Limnephilus lunatus genome assembly, chromosome: 9	70653751	70753750
Limnephilus lunatus	lun2	>OU830600.1 Limnephilus lunatus genome assembly, chromosome: 9	87453751	87553750
Limnephilus lunatus	lun2	>OU830601.1 Limnephilus lunatus genome assembly, chromosome: 10	121549	221548
Limnephilus lunatus	lun2	>OU830601.1 Limnephilus lunatus genome assembly, chromosome: 10	87321549	87370151
Limnephilus lunatus	lun2	>OU830601.1 Limnephilus lunatus genome assembly, chromosome: 10	1	21548
Limnephilus lunatus	lun2	>OU830601.1 Limnephilus lunatus genome assembly, chromosome: 10	49721549	49821548
Limnephilus lunatus	lun2	>OU830601.1 Limnephilus lunatus genome assembly, chromosome: 10	49621549	49721548
Limnephilus lunatus	lun2	>OU830601.1 Limnephilus lunatus genome assembly, chromosome: 10	37021549	37121548
Limnephilus lunatus	lun2	>OU830601.1 Limnephilus lunatus genome assembly, chromosome: 10	21549	121548
Limnephilus lunatus	lun2	>OU830601.1 Limnephilus lunatus genome assembly, chromosome: 10	37121549	37221548
Limnephilus lunatus	lun2	>OU830602.1 Limnephilus lunatus genome assembly, chromosome: 11	19951397	20051396
Limnephilus lunatus	lun2	>OU830602.1 Limnephilus lunatus genome assembly, chromosome: 11	1	51396
Limnephilus lunatus	lun2	>OU830602.1 Limnephilus lunatus genome assembly, chromosome: 11	37151397	37251396
Limnephilus lunatus	lun2	>OU830602.1 Limnephilus lunatus genome assembly, chromosome: 11	19751397	19851396
Limnephilus lunatus	lun2	>OU830602.1 Limnephilus lunatus genome assembly, chromosome: 11	19851397	19951396
Limnephilus lunatus	lun2	>OU830602.1 Limnephilus lunatus genome assembly, chromosome: 11	47951397	48051396
Limnephilus lunatus	lun2	>OU830602.1 Limnephilus lunatus genome assembly, chromosome: 11	70751397	70851396
Limnephilus lunatus	lun2	>OU830603.1 Limnephilus lunatus genome assembly, chromosome: 12	25951805	26051804
Limnephilus lunatus	lun2	>OU830603.1 Limnephilus lunatus genome assembly, chromosome: 12	52451805	52551804
Limnephilus lunatus	lun2	>OU830603.1 Limnephilus lunatus genome assembly, chromosome: 12	68651805	68714448
Limnephilus lunatus	lun2	>OU830603.1 Limnephilus lunatus genome assembly, chromosome: 12	52251805	52351804
Limnephilus lunatus	lun2	>OU830603.1 Limnephilus lunatus genome assembly, chromosome: 12	52351805	52451804
Limnephilus lunatus	lun2	>OU830604.1 Limnephilus lunatus genome assembly, chromosome: Z	1	37355
Limnephilus lunatus	lun2	>OU830604.1 Limnephilus lunatus genome assembly, chromosome: Z	35637356	35737355
Harmonia axyridis	axy1	>NC_059502.1 Harmonia axyridis chromosome 2, icHarAxyr1.1, whole genome shotgun sequence	46054864	46154863
Harmonia axyridis	axy1	>NC_059502.1 Harmonia axyridis chromosome 2, icHarAxyr1.1, whole genome shotgun sequence	40854864	40954863
Harmonia axyridis	axy1	>NC_059502.1 Harmonia axyridis chromosome 2, icHarAxyr1.1, whole genome shotgun sequence	43854864	43954863
Harmonia axyridis	axy1	>NC_059502.1 Harmonia axyridis chromosome 2, icHarAxyr1.1, whole genome shotgun sequence	45254864	45354863
Harmonia axyridis	axy1	>NC_059502.1 Harmonia axyridis chromosome 2, icHarAxyr1.1, whole genome shotgun sequence	45054864	45154863
Harmonia axyridis	axy1	>NC_059502.1 Harmonia axyridis chromosome 2, icHarAxyr1.1, whole genome shotgun sequence	43954864	44054863
Harmonia axyridis	axy1	>NC_059502.1 Harmonia axyridis chromosome 2, icHarAxyr1.1, whole genome shotgun sequence	40954864	41054863
Harmonia axyridis	axy1	>NC_059502.1 Harmonia axyridis chromosome 2, icHarAxyr1.1, whole genome shotgun sequence	41854864	41954863
Harmonia axyridis	axy1	>NC_059502.1 Harmonia axyridis chromosome 2, icHarAxyr1.1, whole genome shotgun sequence	43054864	43154863
Harmonia axyridis	axy1	>NC_059502.1 Harmonia axyridis chromosome 2, icHarAxyr1.1, whole genome shotgun sequence	42954864	43054863
Harmonia axyridis	axy1	>NC_059502.1 Harmonia axyridis chromosome 2, icHarAxyr1.1, whole genome shotgun sequence	41954864	42054863
Harmonia axyridis	axy1	>NC_059502.1 Harmonia axyridis chromosome 2, icHarAxyr1.1, whole genome shotgun sequence	41254864	41354863
Harmonia axyridis	axy1	>NC_059502.1 Harmonia axyridis chromosome 2, icHarAxyr1.1, whole genome shotgun sequence	45854864	45954863
Harmonia axyridis	axy1	>NC_059502.1 Harmonia axyridis chromosome 2, icHarAxyr1.1, whole genome shotgun sequence	44954864	45054863
Harmonia axyridis	axy1	>NC_059502.1 Harmonia axyridis chromosome 2, icHarAxyr1.1, whole genome shotgun sequence	44054864	44154863
Harmonia axyridis	axy1	>NC_059502.1 Harmonia axyridis chromosome 2, icHarAxyr1.1, whole genome shotgun sequence	41054864	41154863
Harmonia axyridis	axy1	>NC_059502.1 Harmonia axyridis chromosome 2, icHarAxyr1.1, whole genome shotgun sequence	40254864	40354863
Harmonia axyridis	axy1	>NC_059502.1 Harmonia axyridis chromosome 2, icHarAxyr1.1, whole genome shotgun sequence	43254864	43354863
Harmonia axyridis	axy1	>NC_059502.1 Harmonia axyridis chromosome 2, icHarAxyr1.1, whole genome shotgun sequence	44854864	44954863
Harmonia axyridis	axy1	>NC_059502.1 Harmonia axyridis chromosome 2, icHarAxyr1.1, whole genome shotgun sequence	45954864	46054863
Harmonia axyridis	axy1	>NC_059502.1 Harmonia axyridis chromosome 2, icHarAxyr1.1, whole genome shotgun sequence	40554864	40654863
Harmonia axyridis	axy1	>NC_059502.1 Harmonia axyridis chromosome 2, icHarAxyr1.1, whole genome shotgun sequence	43554864	43654863
Harmonia axyridis	axy1	>NC_059502.1 Harmonia axyridis chromosome 2, icHarAxyr1.1, whole genome shotgun sequence	45354864	45454863
Harmonia axyridis	axy1	>NC_059502.1 Harmonia axyridis chromosome 2, icHarAxyr1.1, whole genome shotgun sequence	45154864	45254863
Harmonia axyridis	axy1	>NC_059502.1 Harmonia axyridis chromosome 2, icHarAxyr1.1, whole genome shotgun sequence	44654864	44754863
Harmonia axyridis	axy1	>NC_059502.1 Harmonia axyridis chromosome 2, icHarAxyr1.1, whole genome shotgun sequence	45454864	45554863
Harmonia axyridis	axy1	>NC_059502.1 Harmonia axyridis chromosome 2, icHarAxyr1.1, whole genome shotgun sequence	45754864	45854863
Harmonia axyridis	axy1	>NC_059502.1 Harmonia axyridis chromosome 2, icHarAxyr1.1, whole genome shotgun sequence	45654864	45754863
Harmonia axyridis	axy1	>NC_059502.1 Harmonia axyridis chromosome 2, icHarAxyr1.1, whole genome shotgun sequence	44454864	44554863
Harmonia axyridis	axy1	>NC_059502.1 Harmonia axyridis chromosome 2, icHarAxyr1.1, whole genome shotgun sequence	44754864	44854863
Harmonia axyridis	axy1	>NC_059502.1 Harmonia axyridis chromosome 2, icHarAxyr1.1, whole genome shotgun sequence	42054864	42154863
Harmonia axyridis	axy1	>NC_059502.1 Harmonia axyridis chromosome 2, icHarAxyr1.1, whole genome shotgun sequence	43454864	43554863
Harmonia axyridis	axy1	>NC_059502.1 Harmonia axyridis chromosome 2, icHarAxyr1.1, whole genome shotgun sequence	40454864	40554863
Harmonia axyridis	axy1	>NC_059502.1 Harmonia axyridis chromosome 2, icHarAxyr1.1, whole genome shotgun sequence	43754864	43854863
Harmonia axyridis	axy1	>NC_059502.1 Harmonia axyridis chromosome 2, icHarAxyr1.1, whole genome shotgun sequence	40754864	40854863
Harmonia axyridis	axy1	>NC_059502.1 Harmonia axyridis chromosome 2, icHarAxyr1.1, whole genome shotgun sequence	41154864	41254863
Harmonia axyridis	axy1	>NC_059502.1 Harmonia axyridis chromosome 2, icHarAxyr1.1, whole genome shotgun sequence	40654864	40754863
Harmonia axyridis	axy1	>NC_059502.1 Harmonia axyridis chromosome 2, icHarAxyr1.1, whole genome shotgun sequence	41354864	41454863
Harmonia axyridis	axy1	>NC_059502.1 Harmonia axyridis chromosome 2, icHarAxyr1.1, whole genome shotgun sequence	42354864	42454863
Harmonia axyridis	axy1	>NC_059502.1 Harmonia axyridis chromosome 2, icHarAxyr1.1, whole genome shotgun sequence	42754864	42854863
Harmonia axyridis	axy1	>NC_059502.1 Harmonia axyridis chromosome 2, icHarAxyr1.1, whole genome shotgun sequence	45554864	45654863
Harmonia axyridis	axy1	>NC_059502.1 Harmonia axyridis chromosome 2, icHarAxyr1.1, whole genome shotgun sequence	41754864	41854863
Harmonia axyridis	axy1	>NC_059502.1 Harmonia axyridis chromosome 2, icHarAxyr1.1, whole genome shotgun sequence	42454864	42554863
Harmonia axyridis	axy1	>NC_059502.1 Harmonia axyridis chromosome 2, icHarAxyr1.1, whole genome shotgun sequence	44554864	44654863
Harmonia axyridis	axy1	>NC_059502.1 Harmonia axyridis chromosome 2, icHarAxyr1.1, whole genome shotgun sequence	43154864	43254863
Harmonia axyridis	axy1	>NC_059502.1 Harmonia axyridis chromosome 2, icHarAxyr1.1, whole genome shotgun sequence	40354864	40454863
Harmonia axyridis	axy1	>NC_059502.1 Harmonia axyridis chromosome 2, icHarAxyr1.1, whole genome shotgun sequence	42654864	42754863
Harmonia axyridis	axy1	>NC_059503.1 Harmonia axyridis chromosome 3, icHarAxyr1.1, whole genome shotgun sequence	46321660	46421659
Harmonia axyridis	axy1	>NC_059503.1 Harmonia axyridis chromosome 3, icHarAxyr1.1, whole genome shotgun sequence	43921660	44021659
Harmonia axyridis	axy1	>NC_059503.1 Harmonia axyridis chromosome 3, icHarAxyr1.1, whole genome shotgun sequence	50121660	50221659
Harmonia axyridis	axy1	>NC_059503.1 Harmonia axyridis chromosome 3, icHarAxyr1.1, whole genome shotgun sequence	48721660	48821659
Harmonia axyridis	axy1	>NC_059503.1 Harmonia axyridis chromosome 3, icHarAxyr1.1, whole genome shotgun sequence	46021660	46121659
Harmonia axyridis	axy1	>NC_059503.1 Harmonia axyridis chromosome 3, icHarAxyr1.1, whole genome shotgun sequence	48921660	49021659
Harmonia axyridis	axy1	>NC_059503.1 Harmonia axyridis chromosome 3, icHarAxyr1.1, whole genome shotgun sequence	48221660	48321659
Harmonia axyridis	axy1	>NC_059503.1 Harmonia axyridis chromosome 3, icHarAxyr1.1, whole genome shotgun sequence	48321660	48421659
Harmonia axyridis	axy1	>NC_059503.1 Harmonia axyridis chromosome 3, icHarAxyr1.1, whole genome shotgun sequence	46721660	46821659
Harmonia axyridis	axy1	>NC_059503.1 Harmonia axyridis chromosome 3, icHarAxyr1.1, whole genome shotgun sequence	48021660	48121659
Harmonia axyridis	axy1	>NC_059503.1 Harmonia axyridis chromosome 3, icHarAxyr1.1, whole genome shotgun sequence	46221660	46321659
Harmonia axyridis	axy1	>NC_059503.1 Harmonia axyridis chromosome 3, icHarAxyr1.1, whole genome shotgun sequence	46921660	47021659
Harmonia axyridis	axy1	>NC_059503.1 Harmonia axyridis chromosome 3, icHarAxyr1.1, whole genome shotgun sequence	47021660	47121659
Harmonia axyridis	axy1	>NC_059503.1 Harmonia axyridis chromosome 3, icHarAxyr1.1, whole genome shotgun sequence	47921660	48021659
Harmonia axyridis	axy1	>NC_059503.1 Harmonia axyridis chromosome 3, icHarAxyr1.1, whole genome shotgun sequence	49221660	49321659
Harmonia axyridis	axy1	>NC_059503.1 Harmonia axyridis chromosome 3, icHarAxyr1.1, whole genome shotgun sequence	44621660	44721659
Harmonia axyridis	axy1	>NC_059503.1 Harmonia axyridis chromosome 3, icHarAxyr1.1, whole genome shotgun sequence	47321660	47421659
Harmonia axyridis	axy1	>NC_059503.1 Harmonia axyridis chromosome 3, icHarAxyr1.1, whole genome shotgun sequence	44221660	44321659
Harmonia axyridis	axy1	>NC_059503.1 Harmonia axyridis chromosome 3, icHarAxyr1.1, whole genome shotgun sequence	49021660	49121659
Harmonia axyridis	axy1	>NC_059503.1 Harmonia axyridis chromosome 3, icHarAxyr1.1, whole genome shotgun sequence	47221660	47321659
Harmonia axyridis	axy1	>NC_059503.1 Harmonia axyridis chromosome 3, icHarAxyr1.1, whole genome shotgun sequence	45921660	46021659
Harmonia axyridis	axy1	>NC_059503.1 Harmonia axyridis chromosome 3, icHarAxyr1.1, whole genome shotgun sequence	44321660	44421659
Harmonia axyridis	axy1	>NC_059503.1 Harmonia axyridis chromosome 3, icHarAxyr1.1, whole genome shotgun sequence	44821660	44921659
Harmonia axyridis	axy1	>NC_059503.1 Harmonia axyridis chromosome 3, icHarAxyr1.1, whole genome shotgun sequence	44021660	44121659
Harmonia axyridis	axy1	>NC_059503.1 Harmonia axyridis chromosome 3, icHarAxyr1.1, whole genome shotgun sequence	50021660	50121659
Harmonia axyridis	axy1	>NC_059503.1 Harmonia axyridis chromosome 3, icHarAxyr1.1, whole genome shotgun sequence	46121660	46221659
Harmonia axyridis	axy1	>NC_059503.1 Harmonia axyridis chromosome 3, icHarAxyr1.1, whole genome shotgun sequence	48121660	48221659
Harmonia axyridis	axy1	>NC_059503.1 Harmonia axyridis chromosome 3, icHarAxyr1.1, whole genome shotgun sequence	47121660	47221659
Harmonia axyridis	axy1	>NC_059503.1 Harmonia axyridis chromosome 3, icHarAxyr1.1, whole genome shotgun sequence	49121660	49221659
Harmonia axyridis	axy1	>NC_059503.1 Harmonia axyridis chromosome 3, icHarAxyr1.1, whole genome shotgun sequence	49921660	50021659
Harmonia axyridis	axy1	>NC_059503.1 Harmonia axyridis chromosome 3, icHarAxyr1.1, whole genome shotgun sequence	44121660	44221659
Harmonia axyridis	axy1	>NC_059503.1 Harmonia axyridis chromosome 3, icHarAxyr1.1, whole genome shotgun sequence	45221660	45321659
Harmonia axyridis	axy1	>NC_059503.1 Harmonia axyridis chromosome 3, icHarAxyr1.1, whole genome shotgun sequence	46821660	46921659
Harmonia axyridis	axy1	>NC_059503.1 Harmonia axyridis chromosome 3, icHarAxyr1.1, whole genome shotgun sequence	45021660	45121659
Harmonia axyridis	axy1	>NC_059503.1 Harmonia axyridis chromosome 3, icHarAxyr1.1, whole genome shotgun sequence	43821660	43921659
Harmonia axyridis	axy1	>NC_059503.1 Harmonia axyridis chromosome 3, icHarAxyr1.1, whole genome shotgun sequence	45321660	45421659
Harmonia axyridis	axy1	>NC_059503.1 Harmonia axyridis chromosome 3, icHarAxyr1.1, whole genome shotgun sequence	48821660	48921659
Harmonia axyridis	axy1	>NC_059503.1 Harmonia axyridis chromosome 3, icHarAxyr1.1, whole genome shotgun sequence	44921660	45021659
Harmonia axyridis	axy1	>NC_059503.1 Harmonia axyridis chromosome 3, icHarAxyr1.1, whole genome shotgun sequence	44721660	44821659
Harmonia axyridis	axy1	>NC_059503.1 Harmonia axyridis chromosome 3, icHarAxyr1.1, whole genome shotgun sequence	46621660	46721659
Harmonia axyridis	axy1	>NC_059503.1 Harmonia axyridis chromosome 3, icHarAxyr1.1, whole genome shotgun sequence	45121660	45221659
Harmonia axyridis	axy1	>NC_059503.1 Harmonia axyridis chromosome 3, icHarAxyr1.1, whole genome shotgun sequence	48421660	48521659
Harmonia axyridis	axy1	>NC_059503.1 Harmonia axyridis chromosome 3, icHarAxyr1.1, whole genome shotgun sequence	47421660	47521659
Harmonia axyridis	axy1	>NC_059503.1 Harmonia axyridis chromosome 3, icHarAxyr1.1, whole genome shotgun sequence	49821660	49921659
Harmonia axyridis	axy1	>NC_059503.1 Harmonia axyridis chromosome 3, icHarAxyr1.1, whole genome shotgun sequence	44521660	44621659
Harmonia axyridis	axy1	>NC_059503.1 Harmonia axyridis chromosome 3, icHarAxyr1.1, whole genome shotgun sequence	47521660	47621659
Harmonia axyridis	axy1	>NC_059503.1 Harmonia axyridis chromosome 3, icHarAxyr1.1, whole genome shotgun sequence	44421660	44521659
Harmonia axyridis	axy1	>NC_059506.1 Harmonia axyridis chromosome 6, icHarAxyr1.1, whole genome shotgun sequence	11887872	11987871
Harmonia axyridis	axy1	>NC_059506.1 Harmonia axyridis chromosome 6, icHarAxyr1.1, whole genome shotgun sequence	12687872	12787871
Harmonia axyridis	axy1	>NC_059506.1 Harmonia axyridis chromosome 6, icHarAxyr1.1, whole genome shotgun sequence	14487872	14587871
Harmonia axyridis	axy1	>NC_059506.1 Harmonia axyridis chromosome 6, icHarAxyr1.1, whole genome shotgun sequence	13587872	13687871
Harmonia axyridis	axy1	>NC_059506.1 Harmonia axyridis chromosome 6, icHarAxyr1.1, whole genome shotgun sequence	13487872	13587871
Harmonia axyridis	axy1	>NC_059506.1 Harmonia axyridis chromosome 6, icHarAxyr1.1, whole genome shotgun sequence	14587872	14687871
Harmonia axyridis	axy1	>NC_059506.1 Harmonia axyridis chromosome 6, icHarAxyr1.1, whole genome shotgun sequence	13887872	13987871
Harmonia axyridis	axy1	>NC_059506.1 Harmonia axyridis chromosome 6, icHarAxyr1.1, whole genome shotgun sequence	13687872	13787871
Harmonia axyridis	axy1	>NC_059506.1 Harmonia axyridis chromosome 6, icHarAxyr1.1, whole genome shotgun sequence	12487872	12587871
Harmonia axyridis	axy1	>NC_059506.1 Harmonia axyridis chromosome 6, icHarAxyr1.1, whole genome shotgun sequence	14687872	14787871
Harmonia axyridis	axy1	>NC_059506.1 Harmonia axyridis chromosome 6, icHarAxyr1.1, whole genome shotgun sequence	12887872	12987871
Harmonia axyridis	axy1	>NC_059506.1 Harmonia axyridis chromosome 6, icHarAxyr1.1, whole genome shotgun sequence	14887872	14987871
Harmonia axyridis	axy1	>NC_059506.1 Harmonia axyridis chromosome 6, icHarAxyr1.1, whole genome shotgun sequence	12587872	12687871
Harmonia axyridis	axy1	>NC_059506.1 Harmonia axyridis chromosome 6, icHarAxyr1.1, whole genome shotgun sequence	11487872	11587871
Harmonia axyridis	axy1	>NC_059506.1 Harmonia axyridis chromosome 6, icHarAxyr1.1, whole genome shotgun sequence	11587872	11687871
Harmonia axyridis	axy1	>NC_059506.1 Harmonia axyridis chromosome 6, icHarAxyr1.1, whole genome shotgun sequence	11687872	11787871
Harmonia axyridis	axy1	>NC_059506.1 Harmonia axyridis chromosome 6, icHarAxyr1.1, whole genome shotgun sequence	12387872	12487871
Harmonia axyridis	axy1	>NC_059506.1 Harmonia axyridis chromosome 6, icHarAxyr1.1, whole genome shotgun sequence	12087872	12187871
Harmonia axyridis	axy1	>NC_059506.1 Harmonia axyridis chromosome 6, icHarAxyr1.1, whole genome shotgun sequence	12287872	12387871
Harmonia axyridis	axy1	>NC_059506.1 Harmonia axyridis chromosome 6, icHarAxyr1.1, whole genome shotgun sequence	11987872	12087871
Harmonia axyridis	axy1	>NC_059506.1 Harmonia axyridis chromosome 6, icHarAxyr1.1, whole genome shotgun sequence	11787872	11887871
Harmonia axyridis	axy1	>NC_059506.1 Harmonia axyridis chromosome 6, icHarAxyr1.1, whole genome shotgun sequence	13187872	13287871
Harmonia axyridis	axy1	>NC_059506.1 Harmonia axyridis chromosome 6, icHarAxyr1.1, whole genome shotgun sequence	12787872	12887871
Harmonia axyridis	axy1	>NC_059506.1 Harmonia axyridis chromosome 6, icHarAxyr1.1, whole genome shotgun sequence	14787872	14887871
Harmonia axyridis	axy1	>NC_059506.1 Harmonia axyridis chromosome 6, icHarAxyr1.1, whole genome shotgun sequence	12987872	13087871
Harmonia axyridis	axy1	>NC_059506.1 Harmonia axyridis chromosome 6, icHarAxyr1.1, whole genome shotgun sequence	12187872	12287871
Harmonia axyridis	axy1	>NC_059506.1 Harmonia axyridis chromosome 6, icHarAxyr1.1, whole genome shotgun sequence	13787872	13887871
Harmonia axyridis	axy1	>NC_059506.1 Harmonia axyridis chromosome 6, icHarAxyr1.1, whole genome shotgun sequence	14387872	14487871
Harmonia axyridis	axy1	>NC_059506.1 Harmonia axyridis chromosome 6, icHarAxyr1.1, whole genome shotgun sequence	13287872	13387871
Harmonia axyridis	axy1	>NC_059506.1 Harmonia axyridis chromosome 6, icHarAxyr1.1, whole genome shotgun sequence	13387872	13487871
Harmonia axyridis	axy1	>NC_059506.1 Harmonia axyridis chromosome 6, icHarAxyr1.1, whole genome shotgun sequence	14287872	14387871
Harmonia axyridis	axy1	>NC_059506.1 Harmonia axyridis chromosome 6, icHarAxyr1.1, whole genome shotgun sequence	13087872	13187871
Harmonia axyridis	axy1	>NC_059507.1 Harmonia axyridis chromosome 7, icHarAxyr1.1, whole genome shotgun sequence	16549183	16649182
Harmonia axyridis	axy1	>NC_059507.1 Harmonia axyridis chromosome 7, icHarAxyr1.1, whole genome shotgun sequence	16749183	16849182
Harmonia axyridis	axy1	>NC_059507.1 Harmonia axyridis chromosome 7, icHarAxyr1.1, whole genome shotgun sequence	16649183	16749182
Harmonia axyridis	axy1	>NC_059507.1 Harmonia axyridis chromosome 7, icHarAxyr1.1, whole genome shotgun sequence	16449183	16549182
Harmonia axyridis	axy1	>NC_059508.1 Harmonia axyridis chromosome X, icHarAxyr1.1, whole genome shotgun sequence	25021585	25121584
Harmonia axyridis	axy1	>NC_059508.1 Harmonia axyridis chromosome X, icHarAxyr1.1, whole genome shotgun sequence	26421585	26521584
Harmonia axyridis	axy1	>NC_059508.1 Harmonia axyridis chromosome X, icHarAxyr1.1, whole genome shotgun sequence	23021585	23121584
Harmonia axyridis	axy1	>NC_059508.1 Harmonia axyridis chromosome X, icHarAxyr1.1, whole genome shotgun sequence	25121585	25221584
Harmonia axyridis	axy1	>NC_059508.1 Harmonia axyridis chromosome X, icHarAxyr1.1, whole genome shotgun sequence	23121585	23221584
Harmonia axyridis	axy1	>NC_059508.1 Harmonia axyridis chromosome X, icHarAxyr1.1, whole genome shotgun sequence	25421585	25521584
Harmonia axyridis	axy1	>NC_059508.1 Harmonia axyridis chromosome X, icHarAxyr1.1, whole genome shotgun sequence	27421585	27521584
Harmonia axyridis	axy1	>NC_059508.1 Harmonia axyridis chromosome X, icHarAxyr1.1, whole genome shotgun sequence	24021585	24121584
Harmonia axyridis	axy1	>NC_059508.1 Harmonia axyridis chromosome X, icHarAxyr1.1, whole genome shotgun sequence	24221585	24321584
Harmonia axyridis	axy1	>NC_059508.1 Harmonia axyridis chromosome X, icHarAxyr1.1, whole genome shotgun sequence	24121585	24221584
Harmonia axyridis	axy1	>NC_059508.1 Harmonia axyridis chromosome X, icHarAxyr1.1, whole genome shotgun sequence	23421585	23521584
Harmonia axyridis	axy1	>NC_059508.1 Harmonia axyridis chromosome X, icHarAxyr1.1, whole genome shotgun sequence	26121585	26221584
Harmonia axyridis	axy1	>NC_059508.1 Harmonia axyridis chromosome X, icHarAxyr1.1, whole genome shotgun sequence	28121585	28221584
Harmonia axyridis	axy1	>NC_059508.1 Harmonia axyridis chromosome X, icHarAxyr1.1, whole genome shotgun sequence	27021585	27121584
Harmonia axyridis	axy1	>NC_059508.1 Harmonia axyridis chromosome X, icHarAxyr1.1, whole genome shotgun sequence	22421585	22521584
Harmonia axyridis	axy1	>NC_059508.1 Harmonia axyridis chromosome X, icHarAxyr1.1, whole genome shotgun sequence	25221585	25321584
Harmonia axyridis	axy1	>NC_059508.1 Harmonia axyridis chromosome X, icHarAxyr1.1, whole genome shotgun sequence	24421585	24521584
Harmonia axyridis	axy1	>NC_059508.1 Harmonia axyridis chromosome X, icHarAxyr1.1, whole genome shotgun sequence	27121585	27221584
Harmonia axyridis	axy1	>NC_059508.1 Harmonia axyridis chromosome X, icHarAxyr1.1, whole genome shotgun sequence	26021585	26121584
Harmonia axyridis	axy1	>NC_059508.1 Harmonia axyridis chromosome X, icHarAxyr1.1, whole genome shotgun sequence	28021585	28121584
Harmonia axyridis	axy1	>NC_059508.1 Harmonia axyridis chromosome X, icHarAxyr1.1, whole genome shotgun sequence	24721585	24821584
Harmonia axyridis	axy1	>NC_059508.1 Harmonia axyridis chromosome X, icHarAxyr1.1, whole genome shotgun sequence	25521585	25621584
Harmonia axyridis	axy1	>NC_059508.1 Harmonia axyridis chromosome X, icHarAxyr1.1, whole genome shotgun sequence	25321585	25421584
Harmonia axyridis	axy1	>NC_059508.1 Harmonia axyridis chromosome X, icHarAxyr1.1, whole genome shotgun sequence	22721585	22821584
Harmonia axyridis	axy1	>NC_059508.1 Harmonia axyridis chromosome X, icHarAxyr1.1, whole genome shotgun sequence	26521585	26621584
Harmonia axyridis	axy1	>NC_059508.1 Harmonia axyridis chromosome X, icHarAxyr1.1, whole genome shotgun sequence	26321585	26421584
Harmonia axyridis	axy1	>NC_059508.1 Harmonia axyridis chromosome X, icHarAxyr1.1, whole genome shotgun sequence	26621585	26721584
Harmonia axyridis	axy1	>NC_059508.1 Harmonia axyridis chromosome X, icHarAxyr1.1, whole genome shotgun sequence	25821585	25921584
Harmonia axyridis	axy1	>NC_059508.1 Harmonia axyridis chromosome X, icHarAxyr1.1, whole genome shotgun sequence	27821585	27921584
Harmonia axyridis	axy1	>NC_059508.1 Harmonia axyridis chromosome X, icHarAxyr1.1, whole genome shotgun sequence	26921585	27021584
Harmonia axyridis	axy1	>NC_059508.1 Harmonia axyridis chromosome X, icHarAxyr1.1, whole genome shotgun sequence	27621585	27721584
Harmonia axyridis	axy1	>NC_059508.1 Harmonia axyridis chromosome X, icHarAxyr1.1, whole genome shotgun sequence	25621585	25721584
Harmonia axyridis	axy1	>NC_059508.1 Harmonia axyridis chromosome X, icHarAxyr1.1, whole genome shotgun sequence	25921585	26021584
Harmonia axyridis	axy1	>NC_059508.1 Harmonia axyridis chromosome X, icHarAxyr1.1, whole genome shotgun sequence	27921585	28021584
Harmonia axyridis	axy1	>NC_059508.1 Harmonia axyridis chromosome X, icHarAxyr1.1, whole genome shotgun sequence	22921585	23021584
Harmonia axyridis	axy1	>NC_059508.1 Harmonia axyridis chromosome X, icHarAxyr1.1, whole genome shotgun sequence	24621585	24721584
Harmonia axyridis	axy1	>NC_059508.1 Harmonia axyridis chromosome X, icHarAxyr1.1, whole genome shotgun sequence	22621585	22721584
Harmonia axyridis	axy1	>NC_059508.1 Harmonia axyridis chromosome X, icHarAxyr1.1, whole genome shotgun sequence	24921585	25021584
Harmonia axyridis	axy1	>NC_059508.1 Harmonia axyridis chromosome X, icHarAxyr1.1, whole genome shotgun sequence	23321585	23421584
Harmonia axyridis	axy1	>NC_059508.1 Harmonia axyridis chromosome X, icHarAxyr1.1, whole genome shotgun sequence	24821585	24921584
Harmonia axyridis	axy1	>NC_059508.1 Harmonia axyridis chromosome X, icHarAxyr1.1, whole genome shotgun sequence	23521585	23621584
Harmonia axyridis	axy1	>NC_059508.1 Harmonia axyridis chromosome X, icHarAxyr1.1, whole genome shotgun sequence	21521585	21621584
Harmonia axyridis	axy1	>NC_059508.1 Harmonia axyridis chromosome X, icHarAxyr1.1, whole genome shotgun sequence	22821585	22921584
Harmonia axyridis	axy1	>NC_059508.1 Harmonia axyridis chromosome X, icHarAxyr1.1, whole genome shotgun sequence	21621585	21721584
Harmonia axyridis	axy1	>NC_059508.1 Harmonia axyridis chromosome X, icHarAxyr1.1, whole genome shotgun sequence	23921585	24021584
Harmonia axyridis	axy1	>NC_059508.1 Harmonia axyridis chromosome X, icHarAxyr1.1, whole genome shotgun sequence	26721585	26821584
Harmonia axyridis	axy1	>NC_059508.1 Harmonia axyridis chromosome X, icHarAxyr1.1, whole genome shotgun sequence	23621585	23721584
Harmonia axyridis	axy1	>NC_059508.1 Harmonia axyridis chromosome X, icHarAxyr1.1, whole genome shotgun sequence	22521585	22621584
Harmonia axyridis	axy1	>NC_059508.1 Harmonia axyridis chromosome X, icHarAxyr1.1, whole genome shotgun sequence	25721585	25821584
Harmonia axyridis	axy1	>NC_059508.1 Harmonia axyridis chromosome X, icHarAxyr1.1, whole genome shotgun sequence	22321585	22421584
Harmonia axyridis	axy1	>NC_059508.1 Harmonia axyridis chromosome X, icHarAxyr1.1, whole genome shotgun sequence	24321585	24421584
Harmonia axyridis	axy1	>NC_059508.1 Harmonia axyridis chromosome X, icHarAxyr1.1, whole genome shotgun sequence	23821585	23921584
Harmonia axyridis	axy1	>NC_059508.1 Harmonia axyridis chromosome X, icHarAxyr1.1, whole genome shotgun sequence	24521585	24621584
