# Supplementary material for: Unsupervised AI reveals insect species-specific genome signatures
Source: PeerJ. 2024 Mar 6;12:e17025. doi: 10.7717/peerj.17025 (PMC10924456; doi:10.7717/peerj.17025)
Supplement: Table S4 [file peerj-12-17025-s023.xlsx]

## Sheet: Sheet1
Table S4: The color list of BLSOM for 22 insect species.
Order	Organism Name	Color
Diplura	Campodea augens
Collembola	Folsomia candida
Odonata	Ischnura elegans
Ephemeroptera	Cloeon dipterum
Plecoptera	Brachyptera putata
Orthoptera	Schistocerca americana
Phasmida	Timema cristinae
Dermaptera	Anisolabis maritima
Blattaria	Periplaneta americana
Isoptera	Reticulitermes speratus
Mallophaga	Columbicola columbae
Anoplura	Pediculus humanus corporis
Hemiptera	Schizaphis graminum
Thysanoptera	Thrips palmi
Neuroptera	Chrysoperla carnea
Strepsiptera	Mengenilla moldrzyki
Siphonaptera	Ctenocephalides felis
Diptera	Drosophila melanogaster
Lepidoptera	Aricia agestis
Trichoptera	Limnephilus lunatus
Hymenoptera	Aphidius gifuensis
Coleoptera	Harmonia axyridis
