# Supplementary material for: Unsupervised AI reveals insect species-specific genome signatures
Source: PeerJ. 2024 Mar 6;12:e17025. doi: 10.7717/peerj.17025 (PMC10924456; doi:10.7717/peerj.17025)
Supplement: Table S5 [file peerj-12-17025-s024.xlsx]

## Sheet: Sheet1
Table S5: The color list of DegePenta BLSOM for 100-kb sequences of a single species.
	S. americana	I. elegans	A. agestis	L. lunatus	H. sapiens
chr1
chr2
chr3
chr4
chr5
chr6
chr7
chr8
chr9
chr10
chr11
chr12
chr13
chr14
chr15
chr16
chr17
chr18
chr19
chr20
chr21
chr22
chrX
chrY
chrZ
